# Supplementary material for: Growth-rate-dependent and nutrient-specific gene expression resource allocation in fission yeast
Source: Life Sci Alliance. 2022 Feb 28;5(5):e202101223. doi: 10.26508/lsa.202101223 (PMC8886410; doi:10.26508/lsa.202101223)
Supplement: Supplementary file 2 [file LSA-2021-01223_TableS2.xlsx]

## Sheet: TableS2
PomBaseIDs	n_proteins	Protein IDs	total_peptides_all	total_peptides_razor	total_peptides_unique	sequence_coverage	sequence_lengths	mol_weight
SPBC1815.01	1	SPBC1815.01:pep	51	51	50	94.8	439	47.435
SPBC32F12.11	1	SPBC32F12.11:pep	49	49	26	93.5	336	35.869
SPBC14F5.04c	1	SPBC14F5.04c:pep	63	63	63	97.1	414	43.963
SPCC13B11.01	1	SPCC13B11.01:pep	27	27	27	73.1	350	37.396
SPAC9.09	1	SPAC9.09:pep	86	86	86	91.6	764	85.339
SPCC794.09c	1	SPCC794.09c:pep	53	53	1	85.9	460	49.66
SPAC1F8.07c	1	SPAC1F8.07c:pep	53	53	53	85.4	568	61.547
SPBC19C2.07	1	SPBC19C2.07:pep	32	32	32	81.6	358	39.57
SPAC4H3.10c	1	SPAC4H3.10c:pep	56	56	56	88.8	509	55.514
SPCC1739.13	1	SPCC1739.13:pep	68	68	39	78.8	647	70.232
SPCC24B10.21	1	SPCC24B10.21:pep	29	29	29	95.6	249	27.227
SPAC926.04c	1	SPAC926.04c:pep	75	75	75	85.7	704	80.595
SPBC26H8.01	1	SPBC26H8.01:pep	32	32	32	83.2	328	35.274
SPAC26F1.06	1	SPAC26F1.06:pep	35	35	35	89.6	211	23.765
SPAC29B12.04	1	SPAC29B12.04:pep	32	32	32	82.8	296	31.403
SPBC56F2.12	1	SPBC56F2.12:pep	42	42	42	76.5	404	45.188
SPBC1604.05	1	SPBC1604.05:pep	40	40	40	72	550	60.883
SPBC660.16	1	SPBC660.16:pep	47	47	47	88.2	492	53.679
SPCP31B10.07;SPAC513.01c	2	SPCP31B10.07:pep;SPAC513.01c:pep	64;64	64;64	63;63	77	842;842	93.23
SPCC417.08	1	SPCC417.08:pep	79	79	79	78.9	1047	115.8
SPBC8D2.18c	1	SPBC8D2.18c:pep	33	33	33	62.8	433	47.383
SPAC1071.10c	1	SPAC1071.10c:pep	50	50	40	49.2	919	99.883
SPBC16H5.02	1	SPBC16H5.02:pep	66	66	66	78.5	942	102.55
SPAC24C9.12c	1	SPAC24C9.12c:pep	40	40	39	85.9	467	51.86
SPBC32H8.12c	1	SPBC32H8.12c:pep	29	29	29	81.6	375	41.764
SPCC1223.02	1	SPCC1223.02:pep	38	38	38	90.8	346	38.965
SPAC12G12.04	1	SPAC12G12.04:pep	59	59	59	88.1	582	62.167
SPBP8B7.03c	1	SPBP8B7.03c:pep	32	32	13	64.2	363	39.767
SPBC14F5.05c	1	SPBC14F5.05c:pep	32	32	32	81.4	382	41.831
SPAC4A8.11c	1	SPAC4A8.11c:pep	132	132	132	74.4	1842	202.17
SPCC1020.06c	1	SPCC1020.06c:pep	25	25	25	74.8	322	35.238
SPBC2G5.05	1	SPBC2G5.05:pep	49	49	49	80.6	685	75.181
SPAC6B12.15	1	SPAC6B12.15:pep	24	24	24	82.5	314	34.851
SPAC922.03	1	SPAC922.03:pep	20	20	20	75.1	338	36.687
SPAC9E9.09c	1	SPAC9E9.09c:pep	39	39	39	75.1	503	54.768
SPAC821.10c	1	SPAC821.10c:pep	13	13	13	92.9	154	15.912
SPCC330.06c	1	SPCC330.06c:pep	13	13	13	94.2	156	16.675
SPAC4F8.07c	1	SPAC4F8.07c:pep	39	39	39	80.7	455	50.92
SPBC215.08c	1	SPBC215.08c:pep	77	76	76	67.9	1160	127.48
SPAC23C11.05	1	SPAC23C11.05:pep	27	27	27	92.7	289	32.467
SPBC428.02c	1	SPBC428.02c:pep	26	26	26	57.1	427	47.855
SPBC17G9.11c	1	SPBC17G9.11c:pep	79	79	79	65.1	1185	130.86
SPAC8E11.02c	1	SPAC8E11.02c:pep	30	30	27	86.3	270	30.082
SPAC926.09c	1	SPAC926.09c:pep	125	125	125	62.4	2073	230.56
SPCC576.03c	1	SPCC576.03c:pep	13	13	13	70.8	192	21.191
SPCC794.12c	1	SPCC794.12c:pep	45	45	38	77.2	565	62.534
SPBC1709.05	1	SPBC1709.05:pep	47	47	47	74.4	613	67.205
SPBC215.05	1	SPBC215.05:pep	34	34	34	90.1	385	41.995
SPAC25B8.12c	1	SPAC25B8.12c:pep	18	18	18	73.9	303	33.85
SPAC17A5.03;SPAPB8E5.06c	2	SPAC17A5.03:pep;SPAPB8E5.06c:pep	44;43	44;43	44;43	75	388;388	43.802
SPBC28F2.03	1	SPBC28F2.03:pep	15	15	15	92	162	17.402
SPBC16G5.14c	1	SPBC16G5.14c:pep	29	29	29	88.8	249	27.553
SPBC24C6.04	1	SPBC24C6.04:pep	40	40	40	67	548	60.218
SPAC22H12.04c	1	SPAC22H12.04c:pep	30	30	17	79.4	252	28.521
SPAC589.10c;SPAC6G10.11c;SPBC337.08c	3	SPAC589.10c:pep;SPAC6G10.11c:pep;SPBC337.08c:pep	17;17;11	17;17;11	6;6;0	66.7	150;150;382	17.215
SPBC119.10	1	SPBC119.10:pep	39	39	39	80.6	557	63.24
SPBC428.05c	1	SPBC428.05c:pep	30	30	30	65.1	410	46.084
SPAC664.11	1	SPAC664.11:pep	54	54	54	68.8	674	72.976
SPBC2G2.04c	1	SPBC2G2.04c:pep	10	10	10	66	162	17.543
SPBC3B8.03	1	SPBC3B8.03:pep	31	31	31	70	450	49.938
SPCC132.04c	1	SPCC132.04c:pep	70	70	70	74.5	1106	125.71
SPAC144.03	1	SPAC144.03:pep	30	30	30	71	434	47.876
SPAC110.04c	1	SPAC110.04c:pep	69	69	69	75.6	720	80.374
SPAC1006.07	1	SPAC1006.07:pep	31	31	29	77	392	44.436
SPCC576.08c	1	SPCC576.08c:pep	16	16	16	51	253	27.637
SPBC11C11.09c;SPAC3H5.12c	2	SPBC11C11.09c:pep;SPAC3H5.12c:pep	25;25	25;25	25;25	72.4	294;294	33.485
SPAC24H6.07	1	SPAC24H6.07:pep	21	21	3	69.1	191	22.161
SPCC1259.01c;SPBC16D10.11c	2	SPCC1259.01c:pep;SPBC16D10.11c:pep	16;16	16;16	16;16	65.8	152;152	17.435
SPAC26H5.10c	1	SPAC26H5.10c:pep	16	16	5	87.9	157	17.152
SPBC27.08c	1	SPBC27.08c:pep	40	40	40	68.6	490	54.754
SPAC31G5.03;SPAC144.11	2	SPAC31G5.03:pep;SPAC144.11:pep	20;20	20;20	20;20	78.3	152;152	17.5
SPBC18H10.12c	1	SPBC18H10.12c:pep	33	33	27	80.1	251	28.73
SPAC227.18	1	SPAC227.18:pep	26	26	26	67.7	368	41.392
SPBC839.04;SPBC2F12.07c;SPAC1F7.13c	3	SPBC839.04:pep;SPBC2F12.07c:pep;SPAC1F7.13c:pep	18;18;18	18;18;18	18;18;18	70.8	253;253;253	27.1
SPBP8B7.05c	1	SPBP8B7.05c:pep	28	28	28	57.6	328	37.009
SPBC1105.02c	1	SPBC1105.02c:pep	26	26	26	73.4	418	46.292
SPAC328.10c	1	SPAC328.10c:pep	15	15	2	58.6	203	22.357
SPBC19F8.08	1	SPBC19F8.08:pep	27	27	0	67.6	262	29.688
SPCPB16A4.03c	1	SPCPB16A4.03c:pep	50	50	50	88	585	64.123
SPAC3A12.10;SPAC26A3.04	2	SPAC3A12.10:pep;SPAC26A3.04:pep	25;25	25;25	25;25	77.8	176;176	20.599
SPCC622.12c	1	SPCC622.12c:pep	37	37	37	89.1	451	48.789
SPBC4F6.04	1	SPBC4F6.04:pep	14	14	4	65.2	141	15.767
SPBP16F5.03c	1	SPBP16F5.03c:pep	21	21	21	5.9	3699	422.33
SPAC521.05;SPAC2C4.16c	2	SPAC521.05:pep;SPAC2C4.16c:pep	16;16	16;16	16;16	60.5	200;200	22.564
SPAC56E4.04c	1	SPAC56E4.04c:pep	132	132	132	66.3	2280	256.84
SPBC530.10c	1	SPBC530.10c:pep	20	20	20	64.6	322	35.02
SPAC17G8.06c	1	SPAC17G8.06c:pep	43	43	43	80.4	598	63.926
SPAC29A4.02c	1	SPAC29A4.02c:pep	27	27	27	69.9	409	45.701
SPBC25D12.04	1	SPBC25D12.04:pep	32	32	32	72.9	391	45.405
SPAC1039.06	1	SPAC1039.06:pep	28	28	28	75.7	415	45.647
SPBC29A3.04	1	SPBC29A3.04:pep	26	26	26	68.3	259	28.606
SPBC18E5.04	1	SPBC18E5.04:pep	19	19	1	58.4	221	25.373
SPAC56E4.03	1	SPAC56E4.03:pep	23	23	23	63.7	474	53.166
SPAC3A11.07	1	SPAC3A11.07:pep	37	37	37	68.2	551	61.674
SPBC4F6.18c	1	SPBC4F6.18c:pep	14	14	14	81.1	180	20.618
SPAC3C7.14c	1	SPAC3C7.14c:pep	12	12	12	75.7	202	21.898
SPAC22A12.15c	1	SPAC22A12.15c:pep	50	49	49	57.8	663	73.226
SPAP7G5.04c	1	SPAP7G5.04c:pep	80	80	80	66.8	1419	156.89
SPAC1565.08	1	SPAC1565.08:pep	63	63	63	83.7	815	90.124
SPAC24C9.06c	1	SPAC24C9.06c:pep	46	46	44	50.1	789	86.112
SPAC24H6.04	1	SPAC24H6.04:pep	36	36	36	69.4	484	53.597
SPCC777.09c	1	SPCC777.09c:pep	33	33	33	79.4	441	47.509
SPCC1450.04	1	SPCC1450.04:pep	15	15	15	74.8	214	23.484
SPBC215.09c	1	SPBC215.09c:pep	27	27	27	89.1	395	40.997
SPAC6G10.08	1	SPAC6G10.08:pep	36	36	36	70.4	439	49.478
SPAC6F6.07c	1	SPAC6F6.07c:pep	14	14	14	67.5	151	16.953
SPBC1703.07	1	SPBC1703.07:pep	46	46	46	75.3	615	67.203
SPAC14C4.14	1	SPAC14C4.14:pep	32	32	32	57.8	536	58.587
SPCC1322.04	1	SPCC1322.04:pep	34	34	34	70.6	506	56.429
SPAC1783.08c	1	SPAC1783.08c:pep	16	16	1	57.7	201	23.822
SPAC23H4.06	1	SPAC23H4.06:pep	24	24	24	72.4	359	40.018
SPBC17G9.10;SPAC26A3.07c	2	SPBC17G9.10:pep;SPAC26A3.07c:pep	19;19	19;19	19;19	78.2	174;174	19.891
SPCC364.07	1	SPCC364.07:pep	31	31	31	72.1	466	50.882
SPAC5D6.01;SPAC22A12.04c	2	SPAC5D6.01:pep;SPAC22A12.04c:pep	13;13	13;13	13;13	72.3	130;130	14.76
SPBC18H10.13;SPAC3H5.05c	2	SPBC18H10.13:pep;SPAC3H5.05c:pep	13;13	13;13	13;13	77.7	139;139	14.699
SPAC7D4.07c	1	SPAC7D4.07c:pep	10	10	10	91.3	103	11.297
SPBP8B7.06	1	SPBP8B7.06:pep	10	5	5	100	110	11.158
SPAC9E9.11;SPCC1281.04	2	SPAC9E9.11:pep;SPCC1281.04:pep	23;1	23;1	23;1	63.4	333;333	36.814
SPBC8D2.06	1	SPBC8D2.06:pep	63	63	63	52.7	1064	122.91
SPCC1827.06c	1	SPCC1827.06c:pep	25	25	25	74.8	357	38.55
SPAC20G4.06c	1	SPAC20G4.06c:pep	15	15	15	80.3	137	15.62
SPAPJ698.02c	1	SPAPJ698.02c:pep	22	22	19	64.5	287	31.42
SPAC26F1.07	1	SPAC26F1.07:pep	28	28	28	79.4	321	36.192
SPAC1834.02	1	SPAC1834.02:pep	88	88	88	64.5	1573	173.78
SPAC10F6.06	1	SPAC10F6.06:pep	23	23	23	93.8	257	27.459
SPCC622.18	1	SPCC622.18:pep	15	15	15	62.6	195	21.248
SPAC1002.09c	1	SPAC1002.09c:pep	33	33	33	66.7	511	54.731
SPAC19A8.15	1	SPAC19A8.15:pep	44	44	44	78.9	697	75.436
SPAPB1E7.07	1	SPAPB1E7.07:pep	102	102	102	55.9	2111	232.85
SPCC576.09	1	SPCC576.09:pep	10	10	10	57.6	118	13.544
SPAC10F6.01c	1	SPAC10F6.01c:pep	85	85	85	71.7	1473	163.84
SPBC25H2.05	1	SPBC25H2.05:pep	19	19	19	84.4	173	18.785
SPAC3C7.11c	1	SPAC3C7.11c:pep	25	25	25	56.8	560	63.465
SPAC6F12.13c	1	SPAC6F12.13c:pep	23	23	23	62.2	347	39.516
SPBC25H2.02	1	SPBC25H2.02:pep	53	53	53	71	703	80.137
SPBC1685.10	1	SPBC1685.10:pep	6	6	6	50.6	83	9.1718
SPAC3A12.18	1	SPAC3A12.18:pep	42	42	42	81.4	500	57.204
SPAC26A3.05	1	SPAC26A3.05:pep	73	73	73	54.7	1666	190.02
SPAC57A7.04c	1	SPAC57A7.04c:pep	48	48	48	72.3	653	71.512
SPAC23H4.10c	1	SPAC23H4.10c:pep	34	34	34	81.9	518	55.565
SPAPB1E7.12	1	SPAPB1E7.12:pep	19	19	1	58.6	239	27.475
SPCC965.07c;SPCC191.09c	2	SPCC965.07c:pep;SPCC191.09c:pep	18;2	18;2	18;2	62.2	230;229	26.843
SPAC22A12.11	1	SPAC22A12.11:pep	39	39	39	71.7	580	62.316
SPAC664.05	1	SPAC664.05:pep	22	22	22	71.6	208	23.529
SPAC4G9.16c	1	SPAC4G9.16c:pep	15	15	10	76.8	190	21.513
SPAC18G6.14c	1	SPAC18G6.14c:pep	12	12	12	60.5	195	21.947
SPBC1A4.02c	1	SPBC1A4.02c:pep	25	25	25	77.1	371	39.732
SPAC22G7.06c	1	SPAC22G7.06c:pep	119	119	118	55.3	2244	248.31
SPBC1703.13c	1	SPBC1703.13c:pep	18	18	18	59.5	311	33.843
SPAC4G9.03	1	SPAC4G9.03:pep	25	25	25	85.5	220	24.375
SPCC31H12.04c;SPCC16C4.13c	2	SPCC31H12.04c:pep;SPCC16C4.13c:pep	12;12	12;12	12;12	68.5	165;165	17.666
SPBC12C2.07c	1	SPBC12C2.07c:pep	20	20	20	81.2	298	33.149
SPCC18.14c	1	SPCC18.14c:pep	15	15	15	51.3	312	33.565
SPAC977.14c;SPAC750.01	2	SPAC977.14c:pep;SPAC750.01:pep	32;17	32;17	32;17	81.5	351;325	39.914
SPAP8A3.07c	1	SPAP8A3.07c:pep	29	29	28	76.6	372	40.638
SPAC9E9.03	1	SPAC9E9.03:pep	41	41	41	63.2	758	82.782
SPCC1223.07c	1	SPCC1223.07c:pep	35	35	35	64	580	66.67
SPAC6C3.04	1	SPAC6C3.04:pep	28	28	28	56.7	483	54.16
SPAC3G9.11c	1	SPAC3G9.11c:pep	33	33	32	78.8	570	62.652
SPCC1795.11	1	SPCC1795.11:pep	44	44	43	77.5	636	69.758
SPAC1805.13	1	SPAC1805.13:pep	13	13	13	66.4	134	15.21
SPAC1071.08	1	SPAC1071.08:pep	11	11	6	100	110	11.114
SPCC645.14c	1	SPCC645.14c:pep	52	52	52	78	591	65.544
SPBC3E7.16c	1	SPBC3E7.16c:pep	33	33	33	59.8	584	64.041
SPAC1F12.02c	1	SPAC1F12.02c:pep	14	14	14	94.6	168	19.048
SPCC1183.08c	1	SPCC1183.08c:pep	20	20	9	62.5	216	23.917
SPAP7G5.02c	1	SPAP7G5.02c:pep	42	42	42	73.3	539	60.044
SPAC521.03	1	SPAC521.03:pep	17	17	17	63.7	259	28.148
SPBC11C11.07	1	SPBC11C11.07:pep	15	15	7	50.8	187	21.19
SPAC1F5.02	1	SPAC1F5.02:pep	34	34	34	63.4	492	54.88
SPCC16A11.10c	1	SPCC16A11.10c:pep	7	7	7	54.3	129	14.252
SPAC1556.07	1	SPAC1556.07:pep	23	23	23	82.9	257	29.223
SPBC336.10c	1	SPBC336.10c:pep	13	2	2	54.4	169	18.563
SPAC222.12c	1	SPAC222.12c:pep	29	29	29	76.6	525	56.875
SPBC1778.06c	1	SPBC1778.06c:pep	40	40	40	75.6	614	68.617
SPBC18E5.06	1	SPBC18E5.06:pep	9	9	9	87.4	87	9.6166
SPACUNK4.10	1	SPACUNK4.10:pep	26	26	26	75.1	334	36.701
SPCC736.15	1	SPCC736.15:pep	17	17	17	52.7	351	39.805
SPAC10F6.13c	1	SPAC10F6.13c:pep	26	26	25	86.8	409	46.14
SPBC1539.03c	1	SPBC1539.03c:pep	33	33	31	63.9	460	51.571
SPAC343.05	1	SPAC343.05:pep	43	43	43	74.8	619	68.805
SPAC26F1.13c	1	SPAC26F1.13c:pep	67	67	67	59.8	1111	126.45
SPAC22A12.16	1	SPAC22A12.16:pep	27	27	27	60.4	492	53.942
SPBC1773.10c	1	SPBC1773.10c:pep	39	39	39	69.4	568	63.869
SPBC1921.05	1	SPBC1921.05:pep	58	58	58	69.6	882	99.445
SPBC2G5.06c	1	SPBC2G5.06c:pep	33	33	33	74.3	459	51.574
SPBC14F5.09c	1	SPBC14F5.09c:pep	35	35	35	66.8	482	54.307
SPAC26H5.09c	1	SPAC26H5.09c:pep	20	20	20	59.1	369	41.432
SPBC1289.03c	1	SPBC1289.03c:pep	16	16	16	46.3	216	24.555
SPBC17G9.03c	1	SPBC17G9.03c:pep	40	40	40	71.6	591	67.493
SPBC18H10.14;SPAC664.04c	2	SPBC18H10.14:pep;SPAC664.04c:pep	20;20	20;20	20;20	89.3	140;140	15.395
SPBC25B2.09c	1	SPBC25B2.09c:pep	50	50	50	78.5	618	70.689
SPAC4G9.09c	1	SPAC4G9.09c:pep	40	40	40	51	885	97.704
SPAC31G5.04	1	SPAC31G5.04:pep	25	25	25	58.8	362	39.256
SPAC17A5.15c	1	SPAC17A5.15c:pep	46	46	46	64.5	716	80.749
SPBC776.03	1	SPBC776.03:pep	30	30	30	84.3	376	40.037
SPAC13G6.02c	1	SPAC13G6.02c:pep	28	15	15	77.8	252	28.488
SPAC25G10.08	1	SPAC25G10.08:pep	63	63	63	76.4	725	84.034
SPAC9E9.06c	1	SPAC9E9.06c:pep	33	33	33	76.3	514	57.631
SPBC1709.02c	1	SPBC1709.02c:pep	54	54	54	61.5	980	111.32
SPAC1F12.07	1	SPAC1F12.07:pep	26	26	26	67.6	389	42.797
SPBC839.16	1	SPBC839.16:pep	64	64	63	69.5	937	101.2
SPCC550.06c	1	SPCC550.06c:pep	11	11	11	63.5	104	11.282
SPCC24B10.09	1	SPCC24B10.09:pep	21	21	12	75.8	132	15.534
SPAC6F12.10c	1	SPAC6F12.10c:pep	64	64	64	56.5	1323	144.86
SPAC1556.02c	1	SPAC1556.02c:pep	38	38	38	70.8	641	70.465
SPBC409.10	1	SPBC409.10:pep	22	22	22	76.3	299	33.913
SPBC428.11	1	SPBC428.11:pep	21	21	21	67.6	429	46.408
SPBC21C3.08c	1	SPBC21C3.08c:pep	27	27	27	70.8	438	48.247
SPBC11B10.02c	1	SPBC11B10.02c:pep	24	24	24	62	384	42.733
SPBC1604.21c	1	SPBC1604.21c:pep	54	54	54	61.7	1012	112.95
SPBC16A3.08c	1	SPBC16A3.08c:pep	25	25	25	71.1	284	30.949
SPBC32F12.10	1	SPBC32F12.10:pep	37	37	37	69	554	60.598
SPAC23A1.11	1	SPAC23A1.11:pep	10	10	2	41.6	197	22.005
SPCC1223.08c	1	SPCC1223.08c:pep	33	33	33	76.8	461	51.522
SPBC17G9.07	1	SPBC17G9.07:pep	10	10	6	54.5	134	15.539
SPCC1322.11;SPAC3G9.03	2	SPCC1322.11:pep;SPAC3G9.03:pep	8;8	8;8	8;8	61.9	139;139	14.882
SPCC70.03c	1	SPCC70.03c:pep	33	33	33	70.3	492	55.812
SPAC13A11.05	1	SPAC13A11.05:pep	34	34	34	65.1	513	56.194
SPBC460.02c	1	SPBC460.02c:pep	25	25	21	74.1	220	25.717
SPCC550.14	1	SPCC550.14:pep	61	61	61	57.6	1291	142.61
SPBP22H7.08	1	SPBP22H7.08:pep	15	15	7	77.6	147	16.443
SPAC17A2.13c	1	SPAC17A2.13c:pep	23	20	20	72.6	270	30.369
SPAC3H5.07	1	SPAC3H5.07:pep	27	21	20	78	250	28.449
SPAC4F8.14c	1	SPAC4F8.14c:pep	29	29	29	66	447	49.238
SPAC26F1.03	1	SPAC26F1.03:pep	29	29	29	72.6	409	45.137
SPCC23B6.01c	1	SPCC23B6.01c:pep	29	29	29	66.6	479	54.647
SPAC3F10.03	1	SPAC3F10.03:pep	41	41	41	62.1	652	74.004
SPCC191.02c	1	SPCC191.02c:pep	44	44	44	68	662	73.035
SPBP35G2.07	1	SPBP35G2.07:pep	35	35	35	51.4	669	73.193
SPBC1773.07c	1	SPBC1773.07c:pep	13	13	13	65.1	215	24.15
SPBC2F12.14c	1	SPBC2F12.14c:pep	32	32	32	60.7	524	57.026
SPAC4A8.04	1	SPAC4A8.04:pep	7	7	7	23.3	467	49.366
SPBC19C7.06	1	SPBC19C7.06:pep	51	51	51	77.9	716	78.874
SPAC1687.06c	1	SPAC1687.06c:pep	16	16	16	66.4	134	14.755
SPBC1703.10	1	SPBC1703.10:pep	14	14	13	70.4	203	22.816
SPBC16C6.11	1	SPBC16C6.11:pep	12	12	6	55.9	127	14.445
SPBC17G9.09	1	SPBC17G9.09:pep	28	28	28	66.8	446	48.78
SPBC29B5.03c	1	SPBC29B5.03c:pep	13	13	13	52.4	126	14.341
SPBP4G3.02	1	SPBP4G3.02:pep	10	10	10	24.1	453	50.557
SPAC27F1.02c	1	SPAC27F1.02c:pep	22	22	22	86.3	161	18.964
SPBC2F12.04	1	SPBC2F12.04:pep	15	15	5	62.6	187	20.814
SPCC622.09	1	SPCC622.09:pep	7	7	7	42.9	126	13.819
SPCC962.04	1	SPCC962.04:pep	12	12	8	88.3	145	15.616
SPAC23C11.09	1	SPAC23C11.09:pep	57	57	57	65.6	959	107.38
SPCC330.14c;SPAC6G9.09c	2	SPCC330.14c:pep;SPAC6G9.09c:pep	9;9	9;9	9;9	36.9	149;149	16.912
SPAC24C9.08	1	SPAC24C9.08:pep	19	19	19	38.9	596	66.606
SPCC1322.13	1	SPCC1322.13:pep	32	32	32	65	552	60.013
SPBC2D10.10c	1	SPBC2D10.10c:pep	24	24	24	67.5	305	32.04
SPAC5H10.03	1	SPAC5H10.03:pep	20	20	20	81.7	219	24.716
SPAC13G6.06c	1	SPAC13G6.06c:pep	51	51	51	61.4	1031	114.23
SPAC23D3.04c	1	SPAC23D3.04c:pep	24	24	24	80.7	373	40.874
SPBC16G5.05c	1	SPBC16G5.05c:pep	22	22	22	70.8	383	41.234
SPAC637.05c	1	SPAC637.05c:pep	30	30	30	82.1	503	55.841
SPCC794.07	1	SPCC794.07:pep	28	28	28	62.9	483	52.06
SPAC19A8.04	1	SPAC19A8.04:pep	38	38	38	74.4	543	62.27
SPBC685.07c	1	SPBC685.07c:pep	11	11	7	60.3	136	15.389
SPAC11E3.15	1	SPAC11E3.15:pep	9	9	9	59	117	13.32
SPAC17G6.14c	1	SPAC17G6.14c:pep	28	28	28	79	434	49.231
SPAC9G1.03c	1	SPAC9G1.03c:pep	6	6	6	55	109	11.591
SPBC1711.13	1	SPBC1711.13:pep	18	18	18	45.1	439	47.553
SPBC17D11.05	1	SPBC17D11.05:pep	61	61	61	64.6	932	107.07
SPAC29A4.15	1	SPAC29A4.15:pep	38	38	38	74.2	450	51.642
SPAC25G10.05c	1	SPAC25G10.05c:pep	21	21	21	65.2	310	34.029
SPAC11D3.07c	1	SPAC11D3.07c:pep	2	2	2	3.5	637	73.418
SPCC1672.05c	1	SPCC1672.05c:pep	29	29	29	72.6	401	44.575
SPAC4A8.16c	1	SPAC4A8.16c:pep	40	40	40	54	918	104.37
SPCC613.10	1	SPCC613.10:pep	23	23	23	65.7	426	45.651
SPBC8D2.03c;SPBC1105.12;SPAC1834.03c	3	SPBC8D2.03c:pep;SPBC1105.12:pep;SPAC1834.03c:pep	11;11;11	11;11;11	11;11;11	63.1	103;103;103	11.423
SPAC19G12.09	1	SPAC19G12.09:pep	17	17	17	65.1	284	31.569
SPCC1827.03c	1	SPCC1827.03c:pep	27	27	27	60	512	56.274
SPAC959.08	1	SPAC959.08:pep	13	13	2	72.5	160	18.353
SPBC1198.08	1	SPBC1198.08:pep	25	25	25	50.4	476	52.84
SPAC343.16	1	SPAC343.16:pep	39	39	39	62.6	721	78.024
SPBP16F5.08c	1	SPBP16F5.08c:pep	26	26	26	62	447	49.889
SPCC306.09c	1	SPCC306.09c:pep	35	35	35	67.9	551	60.243
SPBC530.07c	1	SPBC530.07c:pep	20	20	20	77.3	242	27.839
SPBC4C3.10c	1	SPBC4C3.10c:pep	15	15	15	75.7	226	24.564
SPBC1921.01c	1	SPBC1921.01c:pep	10	10	6	67.6	108	12.187
SPBC26H8.07c	2	SPBC26H8.07c:pep;CON__ENSEMBL:ENSBTAP00000025008	19;3	19;3	19;3	50	448;536	49.471
SPCC584.01c	1	SPCC584.01c:pep	57	57	57	61.2	1006	111.35
SPBC3F6.03	1	SPBC3F6.03:pep	11	11	11	52.2	322	34.618
SPBC11C11.06c	1	SPBC11C11.06c:pep	7	7	7	39.3	178	19.126
SPBC1734.11	1	SPBC1734.11:pep	23	23	23	56.8	407	44.821
SPBC15D4.15	1	SPBC15D4.15:pep	24	24	24	76.5	298	32.793
SPAC3G9.09c	1	SPAC3G9.09c:pep	27	27	27	83	306	34.525
SPBC1539.06	1	SPBC1539.06:pep	11	11	11	85.1	87	9.838
SPBC18H10.02	1	SPBC18H10.02:pep	33	33	33	55.5	676	75.965
SPBC4F6.05c	1	SPBC4F6.05c:pep	14	14	14	58.9	384	42.768
SPBC1711.06	1	SPBC1711.06:pep	31	12	12	67.2	363	39.91
SPBC21C3.13	1	SPBC21C3.13:pep	12	12	6	53.5	144	16.15
SPBP8B7.18c	1	SPBP8B7.18c:pep	24	24	24	56.4	551	61.354
SPBC1773.03c	1	SPBC1773.03c:pep	27	27	27	77.6	459	50.496
SPBP19A11.03c	1	SPBP19A11.03c:pep	44	44	44	58.8	891	97.998
SPBC16D10.08c	1	SPBC16D10.08c:pep	60	60	60	67.4	905	100.51
SPBC405.01	1	SPBC405.01:pep	43	43	43	70.2	788	85.23
SPBC56F2.02	1	SPBC56F2.02:pep	20	20	6	56	193	22.723
SPBC725.01	1	SPBC725.01:pep	24	23	23	65.7	437	48.243
SPAC57A7.12	1	SPAC57A7.12:pep	29	29	29	58.7	566	61.285
SPBC902.05c	1	SPBC902.05c:pep	21	21	21	62	379	41.188
SPAC4D7.05	1	SPAC4D7.05:pep	23	23	23	86.9	328	36.811
SPBC839.05c	1	SPBC839.05c:pep	17	8	8	74	131	15.514
SPAC30C2.04	1	SPAC30C2.04:pep	24	24	24	62.7	450	50.606
SPBC418.01c	1	SPBC418.01c:pep	36	36	36	76.2	541	59.399
SPCC5E4.07	1	SPCC5E4.07:pep	11	11	3	63.5	148	16.653
SPBC9B6.08	1	SPBC9B6.08:pep	19	19	19	81.2	229	25.863
SPBP4H10.13;SPAC23C11.02c	2	SPBP4H10.13:pep;SPAC23C11.02c:pep	10;10	10;10	10;10	62.2	143;143	15.655
SPCC306.08c	1	SPCC306.08c:pep	22	22	22	79.2	341	35.787
SPAC1635.01	1	SPAC1635.01:pep	17	17	17	92.2	282	29.653
SPBC106.03	1	SPBC106.03:pep	23	23	23	68.1	357	40.006
SPAC694.02	1	SPAC694.02:pep	70	70	70	43.6	1717	195.06
SPAC1B3.03c	1	SPAC1B3.03c:pep	21	21	21	57.9	356	40.161
SPBC685.06	1	SPBC685.06:pep	21	18	18	58.9	292	31.759
SPBC839.17c	1	SPBC839.17c:pep	9	9	9	67	112	12.043
SPBC30D10.05c	1	SPBC30D10.05c:pep	22	22	22	80.6	247	26.645
SPAC27E2.03c	1	SPAC27E2.03c:pep	29	29	29	77.8	392	44.332
SPAC3G9.06	1	SPAC3G9.06:pep	32	32	32	65.7	499	56.266
SPAC57A7.10c	1	SPAC57A7.10c:pep	45	45	45	54.3	905	100.93
SPBC16A3.15c	1	SPBC16A3.15c:pep	24	24	12	62.9	455	51.152
SPAC4F10.14c	1	SPAC4F10.14c:pep	11	11	11	66.9	151	16.202
SPBC1677.03c	1	SPBC1677.03c:pep	32	32	32	65.7	600	66.543
SPCC338.14	1	SPCC338.14:pep	15	15	15	63.8	340	36.708
SPAC8E11.10	1	SPAC8E11.10:pep	17	17	17	66.3	255	27.437
SPBC31F10.06c	1	SPBC31F10.06c:pep	15	15	15	81.6	190	21.28
SPAC16.02c	1	SPAC16.02c:pep	25	25	25	67.9	365	42.566
SPBC12C2.12c	1	SPBC12C2.12c:pep	22	22	22	66.9	302	34.41
SPBC146.13c	1	SPBC146.13c:pep	59	59	59	61.4	1217	135.71
SPBC17A3.04c	1	SPBC17A3.04c:pep	41	41	41	59.3	782	88.88
SPAC139.02c	1	SPAC139.02c:pep	18	18	18	59.1	320	35.547
SPBC3D6.02	1	SPBC3D6.02:pep	11	11	11	33.1	390	43.625
SPBC646.05c	1	SPBC646.05c:pep	28	28	28	60.2	460	53.321
SPAC13A11.02c	1	SPAC13A11.02c:pep	28	28	28	62.6	495	56.331
SPAC6G10.09	1	SPAC6G10.09:pep	44	44	44	56.6	808	92.888
SPBC16A3.02c	1	SPBC16A3.02c:pep	17	17	17	63.4	347	38.186
SPBP23A10.15c	1	SPBP23A10.15c:pep	26	26	26	66.5	457	50.737
SPAC23H3.09c	1	SPAC23H3.09c:pep	22	22	22	59.8	376	41.318
SPBC17D11.07c	1	SPBC17D11.07c:pep	48	48	48	57.8	965	107.28
SPCC1183.02	1	SPCC1183.02:pep	19	15	15	79.1	220	25.503
SPCC285.15c;SPAC25G10.06	2	SPCC285.15c:pep;SPAC25G10.06:pep	8;8	8;8	8;8	73.5	68;68	7.6638
SPBC32F12.03c	1	SPBC32F12.03c:pep	10	10	10	63.3	158	18.06
SPCC18B5.01c	1	SPCC18B5.01c:pep	59	59	59	46.7	1530	171.75
SPCC1393.03	1	SPCC1393.03:pep	10	10	6	69.3	153	17.519
SPBC16C6.13c	1	SPBC16C6.13c:pep	42	42	42	61.6	796	89.802
SPAC11E3.07	1	SPAC11E3.07:pep	16	16	16	45.4	227	25.741
SPBC1778.01c	1	SPBC1778.01c:pep	27	27	27	65.8	442	50.209
SPAPB8E5.02c;SPAC1420.03	2	SPAPB8E5.02c:pep;SPAC1420.03:pep	32;32	32;32	32;32	76.1	443;443	51.618
SPBC31A8.01c	1	SPBC31A8.01c:pep	11	11	11	38.6	308	33.659
SPAC17H9.14c	1	SPAC17H9.14c:pep	20	20	20	58.8	359	40.691
SPAC1296.02	1	SPAC1296.02:pep	11	11	11	65.9	164	18.161
SPBPJ4664.04	1	SPBPJ4664.04:pep	64	64	64	69	1207	136.37
SPBP4H10.04	1	SPBP4H10.04:pep	12	12	12	33.6	554	63.714
SPAC31G5.14	1	SPAC31G5.14:pep	23	23	23	65.6	387	42.408
SPAC4F10.20	1	SPAC4F10.20:pep	8	8	8	87.1	101	11.261
SPAC4A8.15c	1	SPAC4A8.15c:pep	4	4	4	44.9	127	13.411
SPAC32A11.04c	1	SPAC32A11.04c:pep	36	36	36	81.3	321	35.96
SPAC14C4.11	1	SPAC14C4.11:pep	38	38	38	55.4	734	85.444
SPBC26H8.03	1	SPBC26H8.03:pep	30	30	30	41.4	905	102.76
SPAC10F6.09c	1	SPAC10F6.09c:pep	20	20	20	20.2	1194	136.85
SPAPB17E12.13	1	SPAPB17E12.13:pep	12	4	4	50.3	187	21.184
SPBP4H10.15	1	SPBP4H10.15:pep	37	35	35	53.5	918	99.9
SPAC31G5.05c	1	SPAC31G5.05c:pep	14	14	14	86.4	228	25.205
SPCC364.06	1	SPCC364.06:pep	16	16	16	49.9	393	44.347
SPACUNK4.07c	1	SPACUNK4.07c:pep	54	54	54	48.1	1211	136.26
SPAC23A1.08c;SPCC1322.15	2	SPAC23A1.08c:pep;SPCC1322.15:pep	8;7	8;7	8;7	58	112;111	12.87
SPBC16H5.08c	1	SPBC16H5.08c:pep	38	38	38	65	618	69.212
SPAC17C9.03	1	SPAC17C9.03:pep	60	60	60	47.8	1403	154.03
SPAC1B3.16c	1	SPAC1B3.16c:pep	16	16	16	31.2	568	62.821
SPAP8A3.04c	1	SPAP8A3.04c:pep	5	5	5	50	68	7.5031
SPCC970.05;SPBC405.07	2	SPCC970.05:pep;SPBC405.07:pep	7;7	7;7	7;7	49.5	99;99	11.263
SPAC1D4.04	1	SPAC1D4.04:pep	28	28	28	67.7	527	56.676
SPAC458.02c	1	SPAC458.02c:pep	34	34	34	61.8	468	53.735
SPCC757.07c	1	SPCC757.07c:pep	24	24	24	55.9	512	58.279
SPBC646.10c	1	SPBC646.10c:pep	26	26	26	64.2	497	55.388
SPCC1235.14	1	SPCC1235.14:pep	11	11	11	28.6	546	60.32
SPAC23G3.06	1	SPAC23G3.06:pep	24	24	24	55.5	508	55.758
SPBC725.09c	1	SPBC725.09c:pep	20	20	20	69.7	264	30.094
SPCC1450.13c	1	SPCC1450.13c:pep	12	12	12	70.2	208	22.861
SPAC1F7.05	1	SPAC1F7.05:pep	38	38	38	55.2	811	91.998
SPACUNK4.16c	1	SPACUNK4.16c:pep	37	37	37	45.9	944	106.82
SPAC11H11.06	1	SPAC11H11.06:pep	19	19	19	47.9	390	44.23
SPCC613.06	1	SPCC613.06:pep	11	6	6	57.1	189	21.382
SPCC584.04;REV__SPCC584.04	2	SPCC584.04:pep;REV__SPCC584.04:pep	47;1	47;1	47;1	67.1	662;662	72.555
SPCC1840.02c	1	SPCC1840.02c:pep	59	59	53	34.7	1955	225.18
SPAC18G6.04c	1	SPAC18G6.04c:pep	27	26	26	62.7	488	53.978
SPBC1A4.08c	1	SPBC1A4.08c:pep	31	31	31	60.6	528	58.48
SPAC14C4.02c	1	SPAC14C4.02c:pep	3	3	3	2.8	1076	124.26
SPBC8D2.20c	1	SPBC8D2.20c:pep	59	59	59	63.6	1224	132.5
SPBC18E5.02c	1	SPBC18E5.02c:pep	25	25	25	53	509	57.468
SPAC3H8.10	1	SPAC3H8.10:pep	21	21	21	74.8	286	32.746
SPBC646.16	1	SPBC646.16:pep	20	20	20	79.1	244	26.539
SPCC1223.14	1	SPCC1223.14:pep	22	22	22	54.7	395	42.324
SPBC12C2.04	1	SPBC12C2.04:pep	18	18	17	57.6	384	43.031
SPBC146.14c	1	SPBC146.14c:pep	35	35	35	51.1	940	104.7
SPAC1039.10	1	SPAC1039.10:pep	7	7	7	70.6	126	13.344
SPBC365.14c	1	SPBC365.14c:pep	19	19	19	75.8	355	39.233
SPAC4D7.08c	1	SPAC4D7.08c:pep	35	35	35	67	533	59.831
SPBC106.06	1	SPBC106.06:pep	28	28	28	54.3	527	56.968
SPAC23C4.02	1	SPAC23C4.02:pep	43	43	43	66.4	601	67.015
SPAC19G12.10c	1	SPAC19G12.10c:pep	22	22	22	28.7	1002	114.24
SPAC3A12.14	1	SPAC3A12.14:pep	9	9	9	66	150	16.905
SPAC1805.11c	1	SPAC1805.11c:pep	6	6	5	40.3	119	13.862
SPAC1A6.04c	1	SPAC1A6.04c:pep	10	10	10	20.9	613	67.118
SPBC19F5.04	1	SPBC19F5.04:pep	27	27	27	48.9	519	56.812
SPCC1450.07c	1	SPCC1450.07c:pep	17	17	17	55.5	348	38.714
SPBC530.14c	1	SPBC530.14c:pep	6	6	6	13.2	544	61.055
SPAC31G5.16c	1	SPAC31G5.16c:pep	16	16	16	77.1	236	26.672
SPBC342.02	1	SPBC342.02:pep	53	53	53	63.6	811	92.072
SPAC1782.11	1	SPAC1782.11:pep	10	10	10	73.8	202	22.669
SPCC1753.04	1	SPCC1753.04:pep	24	24	24	70.5	353	38.747
SPAC18G6.05c	1	SPAC18G6.05c:pep	82	82	82	39.3	2670	297.33
SPAC2G11.07c	1	SPAC2G11.07c:pep	25	25	25	60.6	414	44.856
SPAC4G9.12	1	SPAC4G9.12:pep	11	11	11	67.9	193	21.648
SPCC1281.06c	1	SPCC1281.06c:pep	20	20	20	43.4	479	54.438
SPAC140.01	1	SPAC140.01:pep	15	15	15	50.9	275	31.425
SPBC14F5.03c	1	SPBC14F5.03c:pep	40	40	40	52.3	1067	117.83
SPCC1442.09	1	SPCC1442.09:pep	30	30	30	56.6	489	54.959
SPBC646.13	1	SPBC646.13:pep	20	20	20	60.3	408	44.288
SPBC16C6.08c	1	SPBC16C6.08c:pep	17	17	17	72.9	214	24.307
SPAC3C7.08c	1	SPAC3C7.08c:pep	46	46	46	59.2	1057	116.7
SPCC1906.01	1	SPCC1906.01:pep	18	18	18	65.8	363	39.718
SPBC8E4.04	1	SPBC8E4.04:pep	22	22	22	71.4	325	36.628
SPAC1687.04	1	SPAC1687.04:pep	5	5	5	13.8	501	56.6
SPAC1142.02c	1	SPAC1142.02c:pep	20	20	20	62.5	317	34.001
SPBC18H10.04c	1	SPBC18H10.04c:pep	18	18	18	49	388	42.513
SPAC9E9.13	1	SPAC9E9.13:pep	11	11	11	48.4	186	20.951
SPAC2E1P3.04	1	SPAC2E1P3.04:pep	27	27	26	52.1	712	81.24
SPAC1142.01	1	SPAC1142.01:pep	10	10	10	20.4	656	75.014
SPBC14C8.04	1	SPBC14C8.04:pep	16	16	16	68.2	289	31.834
SPAC29A4.04c	1	SPAC29A4.04c:pep	30	30	30	64.1	474	53.11
SPBC354.12	1	SPBC354.12:pep	35	12	12	80.9	335	35.674
SPAC637.07	1	SPAC637.07:pep	31	31	31	60.8	567	62.636
SPAC1805.02c	1	SPAC1805.02c:pep	12	12	12	53.1	254	27.743
SPBC18E5.07	1	SPBC18E5.07:pep	32	32	32	64.4	615	65.328
SPCC965.06	1	SPCC965.06:pep	22	22	22	72.4	344	38.43
SPBC9B6.04c	1	SPBC9B6.04c:pep	27	27	27	67.7	439	48.282
SPCC11E10.01	1	SPCC11E10.01:pep	15	15	15	56.4	390	42.773
SPAC1039.07c	1	SPAC1039.07c:pep	18	18	18	55.4	448	48.445
SPAC24H6.10c	1	SPAC24H6.10c:pep	19	18	18	66.6	368	39.76
SPAC8C9.04	1	SPAC8C9.04:pep	28	28	28	65.2	647	67.035
SPCC338.10c	1	SPCC338.10c:pep	14	14	14	57.5	186	20.735
SPAC22F8.08	1	SPAC22F8.08:pep	31	31	31	39.6	926	101.9
SPBC17A3.07	1	SPBC17A3.07:pep	18	18	18	52.6	464	49.999
SPBC16E9.05	1	SPBC16E9.05:pep	21	21	21	56.6	378	42.867
SPCC1322.14c	1	SPCC1322.14c:pep	37	37	37	58.7	721	83.634
SPAC630.03	1	SPAC630.03:pep	21	21	21	59.7	427	47.373
SPBC2G2.12	1	SPBC2G2.12:pep	34	34	34	61.1	563	63.304
SPBC8D2.04;SPBC1105.11c;SPAC1834.04	3	SPBC8D2.04:pep;SPBC1105.11c:pep;SPAC1834.04:pep	5;5;5	5;5;5	5;5;5	25	136;136;136	15.357
SPCC16C4.10	1	SPCC16C4.10:pep	21	21	21	70.8	257	28.351
SPBC646.11	1	SPBC646.11:pep	27	27	27	67.3	535	58.548
SPBC337.05c	1	SPBC337.05c:pep	27	27	27	58.4	546	59.955
SPBC30D10.13c	1	SPBC30D10.13c:pep	16	16	16	65.8	366	39.623
SPBC13G1.02	1	SPBC13G1.02:pep	21	21	21	71	414	46.096
SPCC1672.02c	1	SPCC1672.02c:pep	24	24	24	74	254	29.127
SPCC1442.06	1	SPCC1442.06:pep	13	13	13	71	245	26.404
SPAC1486.01	1	SPAC1486.01:pep	10	10	10	62.4	218	24.346
SPCC645.08c	1	SPCC645.08c:pep	36	36	36	54.2	878	98.16
SPBC14F5.06	1	SPBC14F5.06:pep	28	28	28	56.3	593	66.589
SPAC6G10.04c	1	SPAC6G10.04c:pep	19	19	19	64	272	30.11
SPBC25H2.12c	1	SPBC25H2.12c:pep	36	36	36	72	558	60.686
SPCC1682.16	1	SPCC1682.16:pep	28	28	27	72.4	388	43.608
SPBC16C6.07c	1	SPBC16C6.07c:pep	34	34	34	69.6	438	48.965
SPAC1071.07c	1	SPAC1071.07c:pep	10	6	6	69.5	154	17.633
SPCC18.18c	1	SPCC18.18c:pep	15	15	15	43.7	520	56.321
SPCC364.03	1	SPCC364.03:pep	15	5	5	63.6	187	20.827
SPBC23G7.12c	1	SPBC23G7.12c:pep	25	24	24	62.3	403	45.069
SPBP4H10.12	1	SPBP4H10.12:pep	9	9	9	55.9	179	20.101
SPBC16D10.01c	1	SPBC16D10.01c:pep	7	7	7	23.5	336	38.108
SPBC582.09	1	SPBC582.09:pep	14	14	14	65.1	238	26.478
SPBC12C2.06	1	SPBC12C2.06:pep	33	33	33	74.2	503	56.304
SPBPB21E7.07	1	SPBPB21E7.07:pep	15	15	15	81.8	296	32.228
SPBC713.12	1	SPBC713.12:pep	21	21	21	51.2	457	50.338
SPBC21B10.08c	1	SPBC21B10.08c:pep	14	14	14	75.3	198	21.833
SPAC17A2.03c	1	SPAC17A2.03c:pep	20	20	20	62.7	343	39.323
SPAC328.03	1	SPAC328.03:pep	22	22	22	52.8	513	58.493
SPCC330.05c	1	SPCC330.05c:pep	21	21	21	84.8	264	29.361
SPAC17G6.06	1	SPAC17G6.06:pep	9	5	5	46.3	134	15.47
SPCC613.05c	1	SPCC613.05c:pep	9	9	9	41.8	122	14.302
SPAC644.15	1	SPAC644.15:pep	8	6	2	99.1	109	11.141
SPBC1685.13	1	SPBC1685.13:pep	6	6	6	26.8	183	20.273
SPAC11G7.03	1	SPAC11G7.03:pep	19	19	19	63.2	356	38.758
SPAC688.11	1	SPAC688.11:pep	47	47	47	48.5	1102	124.37
SPBC776.09	1	SPBC776.09:pep	27	27	27	61.4	485	54.794
SPBC1685.09	1	SPBC1685.09:pep	5	5	5	58.9	56	6.6575
SPAC1834.01	1	SPAC1834.01:pep	17	17	17	64.7	433	48.803
SPAC56F8.03	1	SPAC56F8.03:pep	46	46	46	54.5	1079	119.93
SPAC23A1.12c	1	SPAC23A1.12c:pep	26	26	26	54.2	589	66.849
SPBC4.06	1	SPBC4.06:pep	24	24	24	68	462	51.975
SPAC15E1.03	1	SPAC15E1.03:pep	5	5	5	35.8	106	12.205
SPBC725.15	1	SPBC725.15:pep	14	14	14	53.5	215	23.716
SPAC22F8.06	1	SPAC22F8.06:pep	12	12	12	63.1	225	25.082
SPAC1F7.04	1	SPAC1F7.04:pep	10	10	5	53	202	22.523
SPAC1002.17c	1	SPAC1002.17c:pep	10	10	10	68.1	204	22.083
SPAC806.04c	1	SPAC806.04c:pep	18	18	17	45.2	438	49.894
SPBC4F6.17c	1	SPBC4F6.17c:pep	37	37	37	48.2	803	90.153
SPAC22F8.05	1	SPAC22F8.05:pep	32	32	32	44.7	891	100.66
SPAC20H4.09	1	SPAC20H4.09:pep	5	5	5	7.9	647	73.032
SPCC338.15	1	SPCC338.15:pep	21	21	21	62.9	437	48.898
SPAC20G8.06	1	SPAC20G8.06:pep	58	58	58	34.8	2100	237.13
SPAC1834.11c	1	SPAC1834.11c:pep	45	45	44	67.8	792	87.553
SPCC162.02c	1	SPCC162.02c:pep	44	44	44	55.2	981	109.85
SPBC428.03c	1	SPBC428.03c:pep	10	10	10	28.3	463	52.118
SPAC30.04c	1	SPAC30.04c:pep	31	31	31	26.1	1469	164.79
SPBC713.02c	1	SPBC713.02c:pep	57	57	57	55.7	1129	130.83
SPAPB8E5.09	1	SPAPB8E5.09:pep	26	26	26	64.9	456	50.052
SPAC1805.16c	1	SPAC1805.16c:pep	21	21	21	79	315	34.238
SPBC56F2.09c	1	SPBC56F2.09c:pep	19	19	19	74.9	415	45.661
SPAC3F10.04	1	SPAC3F10.04:pep	29	29	29	74.3	498	56.152
SPAC13C5.01c	1	SPAC13C5.01c:pep	12	12	12	48	248	27.925
SPAC3H1.07	1	SPAC3H1.07:pep	17	17	12	57	323	35.703
SPBC146.07	1	SPBC146.07:pep	8	8	8	22.2	517	58.932
SPBC3F6.02c	1	SPBC3F6.02c:pep	15	15	15	42.6	340	38.317
SPCC825.01	1	SPCC825.01:pep	40	40	40	53.9	822	92.689
SPBP8B7.25	1	SPBP8B7.25:pep	12	12	12	73.6	201	22.156
SPBC106.18	1	SPBC106.18:pep	13	3	3	64.5	141	15.835
SPBC660.07	1	SPBC660.07:pep	34	34	34	52.2	735	84.602
SPAC8C9.08	1	SPAC8C9.08:pep	14	1	1	58.6	203	22.224
SPAC1687.21	1	SPAC1687.21:pep	11	11	11	54.1	209	23.698
SPBP4H10.11c	1	SPBP4H10.11c:pep	29	29	29	49.9	689	75.79
SPBC119.01	1	SPBC119.01:pep	26	26	26	58.1	497	57.346
SPAC19G12.15c	1	SPAC19G12.15c:pep	40	40	40	53.6	817	93.876
SPAC20G8.04c	1	SPAC20G8.04c:pep	26	26	26	54	632	69.472
SPBC12C2.11	1	SPBC12C2.11:pep	32	32	32	58	696	77.321
SPAC18G6.03	1	SPAC18G6.03:pep	13	13	13	60.3	214	23.861
SPCC1682.09c	1	SPCC1682.09c:pep	14	14	14	54.7	300	33.047
SPAC9G1.05	1	SPAC9G1.05:pep	28	28	28	68.7	595	65.266
SPBC776.15c	1	SPBC776.15c:pep	27	27	27	60.6	452	48.964
SPBC4.07c	1	SPBC4.07c:pep	22	22	22	61.2	448	50.06
SPCC1442.16c	1	SPCC1442.16c:pep	20	20	20	79	329	34.947
SPAC10F6.03c	1	SPAC10F6.03c:pep	29	29	29	54	600	66.867
SPAC5H10.06c	1	SPAC5H10.06c:pep	13	13	13	48.5	379	40.674
SPAC6B12.12	1	SPAC6B12.12:pep	36	36	36	67	625	69.516
SPCC1672.03c	1	SPCC1672.03c:pep	22	22	22	54.3	527	58.046
SPBC106.04	1	SPBC106.04:pep	30	30	30	41.9	831	95.886
SPBC1539.09c	1	SPBC1539.09c:pep	39	39	39	53.1	759	83.039
SPAC22H10.03c	1	SPAC22H10.03c:pep	14	14	14	18.3	993	111.86
SPCC663.09c	1	SPCC663.09c:pep	17	17	15	70.8	253	27.946
SPBC29A10.16c	1	SPBC29A10.16c:pep	5	5	5	65.3	124	13.91
SPBC646.08c	1	SPBC646.08c:pep	32	32	32	60.7	516	58.691
SPBC23E6.06c	1	SPBC23E6.06c:pep	16	16	16	82.4	204	22.564
SPAC1006.01	1	SPAC1006.01:pep	5	5	5	20.8	451	48.732
SPAPB24D3.08c	1	SPAPB24D3.08c:pep	17	17	17	61.3	349	38.612
SPAC23A1.17	1	SPAC23A1.17:pep	44	44	44	36.5	1611	170.53
SPAC23G3.11	1	SPAC23G3.11:pep	17	17	17	55.3	421	47.341
SPAC11D3.02c	1	SPAC11D3.02c:pep	13	13	13	72	150	17.414
SPBC3H7.03c	1	SPBC3H7.03c:pep	35	35	35	44.6	1009	114.16
SPAC3A11.12c	1	SPAC3A11.12c:pep	23	23	23	55.9	438	48.835
SPBC646.07c	1	SPBC646.07c:pep	13	13	13	38.3	295	34.64
SPAC631.01c	1	SPAC631.01c:pep	16	16	16	68.7	268	29.845
SPAC1071.02	1	SPAC1071.02:pep	24	24	24	27	1018	114.67
SPBC29A10.13	1	SPBC29A10.13:pep	13	13	13	63.4	175	19.138
SPBC106.16	1	SPBC106.16:pep	15	15	15	62.2	259	28.277
SPBC27B12.13	1	SPBC27B12.13:pep	18	18	18	72.4	344	37.552
SPAC56F8.05c	1	SPAC56F8.05c:pep	17	17	17	70.3	286	31.747
SPAP8A3.11c	1	SPAP8A3.11c:pep	5	5	5	12.4	419	45.499
SPCC965.08c	1	SPCC965.08c:pep	16	16	16	54.7	375	41.585
SPBC23G7.15c	1	SPBC23G7.15c:pep	7	5	5	100	110	11.12
SPAC890.08	1	SPAC890.08:pep	14	14	14	71.7	113	13.261
SPCC777.03c;SPAC11D3.10	2	SPCC777.03c:pep;SPAC11D3.10:pep	11;1	11;1	11;1	36.4	396;434	44.217
SPBC30D10.03c	1	SPBC30D10.03c:pep	18	18	18	55.6	405	45.805
SPAC57A10.12c	1	SPAC57A10.12c:pep	31	31	31	69.5	443	48.295
SPAC23A1.03	1	SPAC23A1.03:pep	14	14	14	79.3	188	20.746
SPAC13G7.02c	1	SPAC13G7.02c:pep	48	19	19	68.6	644	70.142
SPAP8A3.08	1	SPAP8A3.08:pep	7	7	7	50.4	141	15.661
SPAC19A8.05c	1	SPAC19A8.05c:pep	18	18	18	42.1	610	68.242
SPCC1682.01	1	SPCC1682.01:pep	4	4	4	44.7	85	9.7879
SPBC83.08	1	SPBC83.08:pep	26	26	26	58.7	465	51.561
SPAC959.02	1	SPAC959.02:pep	17	17	17	67.1	289	32.222
SPAC1093.02	1	SPAC1093.02:pep	12	12	12	45.9	231	27.014
SPAC1B2.04	1	SPAC1B2.04:pep	8	8	8	65	140	15.938
SPBC19F5.03	1	SPBC19F5.03:pep	25	25	25	47.7	598	68.712
SPAC6B12.04c	1	SPAC6B12.04c:pep	18	18	18	51.8	421	47.569
SPAC15A10.04c	1	SPAC15A10.04c:pep	21	21	21	66.2	459	51.376
SPBC119.02	1	SPBC119.02:pep	4	4	4	43.5	147	16.476
SPAC17H9.16	1	SPAC17H9.16:pep	5	5	5	36.1	144	15.912
SPBC1711.08	1	SPBC1711.08:pep	18	18	18	71.4	336	37.419
SPBC21D10.12	1	SPBC21D10.12:pep	17	17	17	42.1	466	51.391
SPAC23C11.11	1	SPAC23C11.11:pep	23	23	23	68.7	332	39.527
SPBC1604.07	1	SPBC1604.07:pep	11	11	11	50.4	244	26.7
SPCP31B10.08c	1	SPCP31B10.08c:pep	10	6	6	63	108	12.108
SPAC22E12.17c	1	SPAC22E12.17c:pep	20	20	20	47.2	483	52.583
SPAC23C11.13c	1	SPAC23C11.13c:pep	9	9	9	73.8	206	23.572
SPBC8E4.03	1	SPBC8E4.03:pep	14	14	14	48.9	413	45.901
SPAC22G7.01c	1	SPAC22G7.01c:pep	21	21	21	52.8	598	66.68
SPAPB1E7.09	1	SPAPB1E7.09:pep	23	23	23	36.9	739	85.036
SPAC23H4.09	1	SPAC23H4.09:pep	28	28	28	65.1	381	41.597
SPBC8E4.01c	1	SPBC8E4.01c:pep	20	20	15	34.3	572	63.645
SPCC1223.09	1	SPCC1223.09:pep	18	18	18	73.3	296	33.61
SPCC23B6.04c	1	SPCC23B6.04c:pep	51	51	51	58.4	1008	110.72
SPBC3E7.05c	1	SPBC3E7.05c:pep	25	25	25	45.3	550	63.214
SPAC19G12.08	1	SPAC19G12.08:pep	14	14	14	39.2	347	40.229
SPAC589.06c	1	SPAC589.06c:pep	11	11	11	61.4	202	21.742
SPAC1420.02c	1	SPAC1420.02c:pep	31	31	31	61.5	546	59.377
SPBP8B7.19	1	SPBP8B7.19:pep	45	45	45	50	1019	116.45
SPAC31G5.17c	1	SPAC31G5.17c:pep	14	6	6	72.9	144	16.275
SPBC1773.04	1	SPBC1773.04:pep	21	21	21	60.4	336	37.806
SPCC1235.02	1	SPCC1235.02:pep	17	17	17	40.2	363	40.65
SPBC12D12.03	1	SPBC12D12.03:pep	29	29	29	57.7	556	60.046
SPAC17A2.05	1	SPAC17A2.05:pep	27	27	27	71.7	513	55.483
SPCC737.09c	1	SPCC737.09c:pep	24	24	24	34.3	830	93.993
SPCC962.01	1	SPCC962.01:pep	50	50	50	45.2	1429	156.03
SPCC1682.10	1	SPCC1682.10:pep	15	15	15	67.6	324	35.595
SPCC13B11.04c	1	SPCC13B11.04c:pep	12	11	11	40.5	380	40.711
SPCC1620.06c	1	SPCC1620.06c:pep	21	21	21	57	321	34.779
SPAC23G3.01	1	SPAC23G3.01:pep	47	47	47	43.1	1210	137.85
SPAC12B10.07	1	SPAC12B10.07:pep	18	18	18	68.8	256	29.808
SPAC823.14	1	SPAC823.14:pep	12	12	12	57.2	229	26.271
SPCC663.01c	1	SPCC663.01c:pep	31	31	31	48	838	94.966
SPAC323.02c	1	SPAC323.02c:pep	15	15	15	68	247	27.573
SPAC3H1.03	1	SPAC3H1.03:pep	2	2	2	13.7	146	17.242
SPBC36.04	1	SPBC36.04:pep	16	16	16	59.5	351	37.853
SPBC16H5.06	1	SPBC16H5.06:pep	8	8	8	29.4	228	24.74
SPCC757.09c	1	SPCC757.09c:pep	16	16	16	51.3	398	43.377
SPAC1751.03	1	SPAC1751.03:pep	17	17	17	47.8	402	45.085
SPAC29B12.07	1	SPAC29B12.07:pep	24	24	24	15.1	1995	218.09
SPCC970.03	1	SPCC970.03:pep	18	18	18	57.1	301	33.723
SPAC7D4.10	1	SPAC7D4.10:pep	24	24	24	66.4	450	51.436
SPAC922.04	1	SPAC922.04:pep	3	3	3	22.2	117	12.817
SPAC4G9.10	1	SPAC4G9.10:pep	21	21	21	69.4	327	36.119
SPAC21E11.04	1	SPAC21E11.04:pep	10	10	10	67	209	23.809
SPCC162.09c	1	SPCC162.09c:pep	27	27	27	30.2	1053	114.88
SPCC622.08c;SPAC19G12.06c	2	SPCC622.08c:pep;SPAC19G12.06c:pep	6;4	6;4	5;3	43.9	132;131	13.878
SPBC21H7.07c	1	SPBC21H7.07c:pep	12	12	12	63.9	216	23.52
SPAC513.05	1	SPAC513.05:pep	33	33	33	38.1	1077	122.44
SPBP19A11.01	1	SPBP19A11.01:pep	4	4	4	35.5	169	18.017
SPBC25H2.16c	1	SPBC25H2.16c:pep	23	23	23	40.2	533	59.481
SPBC18H10.03;REV__SPBC15D4.03	2	SPBC18H10.03:pep;REV__SPBC15D4.03:pep	20;1	20;1	20;1	61.3	282;807	31.494
SPAC1A6.10	1	SPAC1A6.10:pep	24	24	24	59.8	485	54.299
SPBC651.01c	1	SPBC651.01c:pep	34	34	34	55.6	642	72.798
SPCC1322.05c	1	SPCC1322.05c:pep	26	26	26	50.8	612	69.521
SPAC1952.11c	1	SPAC1952.11c:pep	26	26	26	44.2	835	91.181
SPAC3H1.05	1	SPAC3H1.05:pep	16	16	16	33.3	474	54.001
SPCPJ732.02c	1	SPCPJ732.02c:pep	26	26	26	46.1	555	61.682
SPAC607.05	1	SPAC607.05:pep	19	19	19	63.5	381	43.457
SPAC12G12.07c	1	SPAC12G12.07c:pep	15	15	15	51.9	412	45.724
SPAC2F3.09	1	SPAC2F3.09:pep	30	30	30	68.1	558	60.959
SPCC1183.07	1	SPCC1183.07:pep	59	59	59	41.5	1690	187.52
SPBC3B9.19	1	SPBC3B9.19:pep	9	9	9	45.7	223	25.334
SPBC365.06	1	SPBC365.06:pep	7	7	7	49.6	117	12.934
SPAC767.01c	1	SPAC767.01c:pep	31	31	30	54.1	678	75.79
SPAC144.12	1	SPAC144.12:pep	15	15	15	61.3	274	29.329
SPBC660.11	1	SPBC660.11:pep	23	23	23	62.8	349	38.002
SPAC13D6.02c	1	SPAC13D6.02c:pep	7	7	7	52	179	19.342
SPCC70.08c	1	SPCC70.08c:pep	13	13	13	66.2	260	29.688
SPCC1259.09c	1	SPCC1259.09c:pep	24	24	24	53.7	456	50.883
SPAC6F6.15	1	SPAC6F6.15:pep	13	13	13	72.5	211	22.985
SPBC14C8.03	1	SPBC14C8.03:pep	22	22	22	59.9	426	47.271
SPAC1F5.06	1	SPAC1F5.06:pep	31	31	31	47.9	848	94.897
SPAC1142.06	1	SPAC1142.06:pep	11	11	11	44.1	329	36.548
SPBC16H5.12c	1	SPBC16H5.12c:pep	33	33	33	60.4	737	82.52
SPAC6F12.07	1	SPAC6F12.07:pep	7	7	7	59.9	152	17.529
SPAC22A12.07c	1	SPAC22A12.07c:pep	17	17	17	24.3	893	101.33
SPAC21E11.08	1	SPAC21E11.08:pep	31	31	31	57	603	67.518
SPBC3B9.01	1	SPBC3B9.01:pep	17	17	17	56.4	287	32.744
SPAC1805.17	1	SPAC1805.17:pep	30	30	30	35.2	1078	123.57
SPCC4F11.02	1	SPCC4F11.02:pep	13	13	13	49	347	38.676
SPAC31A2.04c	1	SPAC31A2.04c:pep	6	6	6	39.7	194	21.967
SPBC4C3.03	1	SPBC4C3.03:pep	15	15	15	57.4	338	36.608
SPAC22E12.07	1	SPAC22E12.07:pep	25	25	25	71.2	386	43.235
SPBC16D10.09	1	SPBC16D10.09:pep	14	14	14	58.5	260	28.969
SPBC29A3.18	1	SPBC29A3.18:pep	11	11	11	46.6	307	34.34
SPAC6F6.10c	1	SPAC6F6.10c:pep	22	22	22	68.8	317	36.974
SPBC365.03c	1	SPBC365.03c:pep	12	1	1	67.5	160	18.38
SPCC1281.01;SPAC1527.01	2	SPCC1281.01:pep;SPAC1527.01:pep	47;2	47;2	43;0	27.4	2410;2397	272.12
SPBC354.10	1	SPBC354.10:pep	28	28	28	38.7	963	100.13
SPCC1672.06c	1	SPCC1672.06c:pep	39	39	39	46.2	920	105.68
SPAC20G4.08	1	SPAC20G4.08:pep	34	34	34	43.3	1076	119.23
SPAC23D3.07	1	SPAC23D3.07:pep	15	15	15	66.7	267	29.337
SPCC297.03	1	SPCC297.03:pep	4	4	4	8.3	652	73.991
SPCC1795.04c	1	SPCC1795.04c:pep	12	12	12	44.3	253	28.031
SPAC25G10.09c	1	SPAC25G10.09c:pep	41	41	41	39.1	1794	193.28
SPAC23C11.17	1	SPAC23C11.17:pep	16	16	16	34.4	485	55.723
SPAC3G9.05	1	SPAC3G9.05:pep	21	21	21	39.6	659	73.872
SPAC27F1.07	1	SPAC27F1.07:pep	16	16	16	47.1	450	51.683
SPBC3H7.15	1	SPBC3H7.15:pep	18	17	16	56.7	365	42.45
SPCC126.06	1	SPCC126.06:pep	22	22	22	68.6	328	36.78
SPBC582.07c	1	SPBC582.07c:pep	21	21	21	45.7	409	46.68
SPAC821.11	1	SPAC821.11:pep	26	26	26	70.7	451	48.706
SPAC4C5.02c	1	SPAC4C5.02c:pep	9	9	9	45.8	201	23.136
SPCC5E4.05c	1	SPCC5E4.05c:pep	20	20	20	73	378	41.623
SPAC26A3.11	1	SPAC26A3.11:pep	17	17	17	53.7	322	35.679
SPAC140.02	1	SPAC140.02:pep	13	13	13	29.6	500	52.987
SPAC57A10.10c	1	SPAC57A10.10c:pep	18	18	18	48.3	298	34.616
SPBC543.02c	1	SPBC543.02c:pep	31	31	31	66.6	476	53.304
SPAC644.05c	1	SPAC644.05c:pep	6	6	6	65.7	140	14.862
SPAC1F7.12	1	SPAC1F7.12:pep	16	16	16	50	340	37.71
SPAPYUK71.03c	1	SPAPYUK71.03c:pep	33	33	33	35.4	1225	135.78
SPBC30D10.14	1	SPBC30D10.14:pep	15	15	15	55	249	27.414
SPAC1F5.10	1	SPAC1F5.10:pep	17	15	15	47.5	394	44.706
SPAC19G12.05	1	SPAC19G12.05:pep	12	12	12	42.6	291	31.573
SPAC694.04c	1	SPAC694.04c:pep	19	19	19	68.5	324	36.672
SPBC2G2.11	1	SPBC2G2.11:pep	21	21	21	51.5	466	53.696
SPAC29E6.06c	1	SPAC29E6.06c:pep	26	26	26	38.2	754	85.554
SPMIT.11	1	SPMIT.11:pep	6	6	6	30.6	248	28.137
SPBC1D7.04	1	SPBC1D7.04:pep	14	14	14	60.8	199	21.791
SPBC29A3.12	1	SPBC29A3.12:pep	20	2	2	66.7	192	22.245
SPCP1E11.09c	1	SPCP1E11.09c:pep	8	5	5	70.6	109	11.216
SPBC19C7.07c	1	SPBC19C7.07c:pep	6	6	6	24.3	284	32.807
SPAC3F10.13	1	SPAC3F10.13:pep	18	18	18	33.7	612	68.72
SPBC2D10.11c	1	SPBC2D10.11c:pep	15	15	15	49.3	379	43.37
SPBC947.15c	1	SPBC947.15c:pep	20	20	20	46.8	551	60.78
SPBC4.03c	1	SPBC4.03c:pep	26	26	26	34.2	891	98.068
SPAC22F3.06c	1	SPAC22F3.06c:pep	43	43	43	45.1	1067	118.64
SPCP1E11.06	1	SPCP1E11.06:pep	26	26	26	42.3	865	96.04
SPCC737.06c	1	SPCC737.06c:pep	16	16	16	53	287	32.66
SPBC215.15	1	SPBC215.15:pep	21	21	21	68	297	32.568
SPBC582.08	1	SPBC582.08:pep	21	21	21	47.5	505	56.627
SPAC2F7.13c	1	SPAC2F7.13c:pep	26	26	26	72.9	395	44.91
SPAC13G7.06	1	SPAC13G7.06:pep	13	13	13	45.9	266	30.56
SPAC1039.02	1	SPAC1039.02:pep	10	10	7	19.6	601	68.065
SPCC338.12	1	SPCC338.12:pep	4	4	4	49.4	77	8.5515
SPCC63.14	1	SPCC63.14:pep	40	40	40	51.4	1184	131.06
SPBC106.17c	1	SPBC106.17c:pep	25	25	25	66.5	504	56.362
SPAC15F9.03c	1	SPAC15F9.03c:pep	5	5	5	43.9	123	14.078
SPBC29B5.02c	1	SPBC29B5.02c:pep	8	8	8	16.2	785	89.191
SPAC24C9.03	1	SPAC24C9.03:pep	19	19	19	56.5	393	42.755
SPAC4A8.13c	1	SPAC4A8.13c:pep	12	12	12	48.2	272	29.986
SPBC800.05c	1	SPBC800.05c:pep	21	9	9	51.7	449	50.535
SPCC576.10c	1	SPCC576.10c:pep	23	22	22	66.6	389	43.552
SPAC5H10.10	1	SPAC5H10.10:pep	23	23	23	64.3	392	44.983
SPAC3F10.11c	1	SPAC3F10.11c:pep	43	43	43	38.7	1478	166.94
SPBC1703.15c	1	SPBC1703.15c:pep	9	9	9	13.5	592	67.599
SPAC222.14c	1	SPAC222.14c:pep	36	36	36	50.1	762	87.509
SPAC13G6.04	1	SPAC13G6.04:pep	8	8	8	88.5	87	9.9873
SPBC106.15	1	SPBC106.15:pep	18	18	18	83	229	27.108
SPBC11G11.07	1	SPBC11G11.07:pep	17	17	17	19.1	955	108.17
SPAP8A3.12c	1	SPAP8A3.12c:pep	39	39	39	37.4	1274	142.92
SPCC31H12.07	1	SPCC31H12.07:pep	25	25	24	39.8	759	84.844
SPAC31G5.13	1	SPAC31G5.13:pep	11	11	11	41.6	308	34.572
SPAPB2B4.05	1	SPAPB2B4.05:pep	18	18	17	61.2	394	44.361
SPCC736.13	1	SPCC736.13:pep	15	15	15	53.7	339	38.513
SPAP8A3.09c	1	SPAP8A3.09c:pep	29	29	29	62.5	590	66.616
SPCC737.02c	1	SPCC737.02c:pep	10	10	10	67.2	137	16.03
SPCC1223.05c;SPAPB17E12.05	2	SPCC1223.05c:pep;SPAPB17E12.05:pep	6;5	6;5	6;5	52.7	91;89	10.087
SPBC4C3.07	1	SPBC4C3.07:pep	12	12	12	55	302	33.251
SPBC577.10	1	SPBC577.10:pep	13	13	13	74.8	262	29.22
SPAC637.04	1	SPAC637.04:pep	19	19	19	23.5	862	98.306
SPBPJ4664.06	1	SPBPJ4664.06:pep	53	53	53	43	1448	165.47
SPAC26A3.12c	1	SPAC26A3.12c:pep	22	22	22	25.1	991	112.37
SPAC1F7.01c	1	SPAC1F7.01c:pep	42	42	42	40.3	1365	157.21
SPAC343.10	1	SPAC343.10:pep	24	24	24	48.4	641	72.139
SPAC19B12.02c	1	SPAC19B12.02c:pep	4	4	4	12.5	542	58.115
SPBC1539.07c	1	SPBC1539.07c:pep	14	14	13	37.3	378	40.444
SPBC646.09c	1	SPBC646.09c:pep	22	22	22	48.9	501	57.114
SPBC887.17	1	SPBC887.17:pep	14	14	14	20.3	625	68.562
SPBC1289.06c	1	SPBC1289.06c:pep	20	20	20	50.5	481	54.652
SPAC25B8.10	1	SPAC25B8.10:pep	10	10	9	38.3	256	29.376
SPAC1805.08	1	SPAC1805.08:pep	6	6	6	58.6	111	12.254
SPBP8B7.16c	1	SPBP8B7.16c:pep	33	32	32	57.3	550	61.547
SPAC4D7.02c	1	SPAC4D7.02c:pep	15	15	15	51.1	311	35.585
SPCC4B3.01	1	SPCC4B3.01:pep	19	19	19	70.1	298	32.8
SPAC16C9.02c	1	SPAC16C9.02c:pep	15	15	15	51.8	307	33.847
SPBC29A3.02c	1	SPBC29A3.02c:pep	13	13	13	44.6	417	46.182
SPBC2D10.12	1	SPBC2D10.12:pep	13	13	13	37.8	368	40.135
SPBC365.16	1	SPBC365.16:pep	10	10	10	35	277	30.406
SPBC365.01	1	SPBC365.01:pep	24	24	24	74.6	355	41.015
SPCC31H12.08c	1	SPCC31H12.08c:pep	17	17	17	34.8	690	76.455
SPBC17G9.06c	1	SPBC17G9.06c:pep	14	14	14	40.4	334	39.775
SPCC1442.14c	1	SPCC1442.14c:pep	7	7	7	69.9	133	14.58
SPBC2G2.16	1	SPBC2G2.16:pep	17	17	17	45.6	412	45.59
SPBC31F10.16	1	SPBC31F10.16:pep	27	27	27	49.9	649	74.094
SPAC2F7.05c	1	SPAC2F7.05c:pep	18	18	18	51.4	395	44.944
SPAC222.08c	1	SPAC222.08c:pep	10	10	10	58.5	234	25.901
SPCC1450.12	1	SPCC1450.12:pep	29	29	29	39.7	821	96.106
SPAC22H10.12c	1	SPAC22H10.12c:pep	22	22	22	59.1	440	49.555
SPBC947.02	1	SPBC947.02:pep	30	30	30	49.5	683	76.681
SPBC21C3.15c	1	SPBC21C3.15c:pep	20	20	20	56.1	522	57.571
SPBC21B10.10	1	SPBC21B10.10:pep	27	2	2	67.6	262	29.658
SPBC713.03	1	SPBC713.03:pep	22	22	22	53.6	526	58.472
SPAC29A4.05	1	SPAC29A4.05:pep	12	12	12	58.7	143	16.218
SPAC1B3.06c	1	SPAC1B3.06c:pep	16	16	16	61.2	278	31.773
SPBC3D6.13c	1	SPBC3D6.13c:pep	24	24	24	31.1	726	81.236
SPBC215.11c	1	SPBC215.11c:pep	19	19	19	73.2	306	33.922
SPAC688.04c	1	SPAC688.04c:pep	8	8	8	37.6	242	28.113
SPCC126.08c	1	SPCC126.08c:pep	13	13	13	56.4	312	35.128
SPAC23H3.15c	1	SPAC23H3.15c:pep	18	18	18	70.5	325	34.692
SPBC9B6.10	1	SPBC9B6.10:pep	23	23	23	57.5	466	52.553
SPBC29A3.09c	1	SPBC29A3.09c:pep	28	28	28	43.6	736	83.761
SPBP8B7.11	1	SPBP8B7.11:pep	13	13	13	42.4	434	47.972
SPBC23E6.04c	1	SPBC23E6.04c:pep	42	42	42	31.2	1649	186.41
SPAC9.03c	1	SPAC9.03c:pep	61	61	61	34.9	2176	248.81
SPAC22A12.08c	1	SPAC22A12.08c:pep	17	17	17	36.8	570	63.879
SPAC821.05	1	SPAC821.05:pep	13	13	13	50.4	357	39.78
SPAPB21F2.02	1	SPAPB21F2.02:pep	15	15	15	10.5	1687	192.65
SPAPB1A10.12c	1	SPAPB1A10.12c:pep	18	18	18	42.7	461	52.027
SPBC1539.04	1	SPBC1539.04:pep	11	11	11	39.8	279	31.57
SPAC22F3.10c	1	SPAC22F3.10c:pep	30	30	30	56.1	669	76.522
SPBC30D10.18c	1	SPBC30D10.18c:pep	18	7	7	53.7	216	23.884
SPAC18B11.04	1	SPAC18B11.04:pep	10	10	10	45.3	190	22.033
SPCC417.16	1	SPCC417.16:pep	3	3	3	78.8	52	5.6246
SPBC577.02	1	SPBC577.02:pep	5	5	3	47.3	74	8.4919
SPAC24B11.05	1	SPAC24B11.05:pep	11	11	11	60.6	226	26.513
SPCPB1C11.03	1	SPCPB1C11.03:pep	12	12	12	18.2	570	64.328
SPBC83.17	1	SPBC83.17:pep	14	14	14	64.2	148	15.979
SPBC1271.12	1	SPBC1271.12:pep	16	16	16	35.1	388	44.591
SPBC29A10.08	1	SPBC29A10.08:pep	9	9	9	25.9	459	50.614
SPBC28F2.11	1	SPBC28F2.11:pep	24	24	24	75.2	310	33.891
SPAC4H3.07c	1	SPAC4H3.07c:pep	9	9	9	58.5	142	16.185
SPAC11D3.15	1	SPAC11D3.15:pep	51	51	51	50	1317	143.72
SPAC1B1.03c	1	SPAC1B1.03c:pep	15	15	15	23.9	863	94.746
SPAC1786.01c	1	SPAC1786.01c:pep	26	26	26	45.2	630	72.521
SPAC26H5.07c	1	SPAC26H5.07c:pep	9	9	9	22.8	505	56.858
SPAC890.07c	1	SPAC890.07c:pep	19	19	19	55.3	340	39.018
SPBC336.04	1	SPBC336.04:pep	17	17	17	20.6	1086	123.57
SPAC22E12.03c	1	SPAC22E12.03c:pep	13	13	13	74.9	191	21.078
SPAC4G8.02c	1	SPAC4G8.02c:pep	5	5	5	72.9	70	7.7912
SPAC922.07c	1	SPAC922.07c:pep	18	18	18	48	496	54.027
SPBC428.16c	1	SPBC428.16c:pep	9	9	9	58.9	185	20.515
SPCC4B3.07	1	SPCC4B3.07:pep	14	14	14	47.1	393	44.449
SPAC25H1.07	1	SPAC25H1.07:pep	28	28	28	40.8	885	100.92
SPCC74.05	1	SPCC74.05:pep	10	6	6	62.5	136	15.305
SPAC513.07	1	SPAC513.07:pep	18	18	18	56.2	336	37.461
SPBC26H8.11c	1	SPBC26H8.11c:pep	10	10	10	60	175	19.59
SPAC1783.05	1	SPAC1783.05:pep	29	27	27	23.5	1373	158.55
SPBC839.15c;SPAC23A1.10	2	SPBC839.15c:pep;SPAC23A1.10:pep	53;53	1;1	1;1	85.9	460;460	49.674
SPBC1711.04	1	SPBC1711.04:pep	22	22	22	69.7	320	35.814
SPCC1840.05c	1	SPCC1840.05c:pep	25	25	25	47.4	587	65.494
SPBC17D1.06	1	SPBC17D1.06:pep	28	28	28	59	578	63.912
SPAC1002.18	1	SPAC1002.18:pep	14	14	14	37.6	399	44.21
SPAC1B3.01c	1	SPAC1B3.01c:pep	12	12	12	74.9	219	24.466
SPAPYUG7.05	1	SPAPYUG7.05:pep	12	12	12	57.8	282	29.875
SPBC354.07c	1	SPBC354.07c:pep	15	15	15	38	397	45.066
SPBC18E5.01	1	SPBC18E5.01:pep	16	16	16	75.1	342	38.22
SPAC23C11.14	1	SPAC23C11.14:pep	7	7	7	31.8	387	42.941
SPCC320.10	1	SPCC320.10:pep	23	23	23	45.1	561	63.28
SPAC26A3.16	1	SPAC26A3.16:pep	13	13	13	44.4	354	36.819
SPCC550.11	1	SPCC550.11:pep	24	24	24	30.6	1029	116.47
SPCC18.16c	1	SPCC18.16c:pep	11	11	11	73	163	18.913
SPAC20G8.09c	1	SPAC20G8.09c:pep	36	36	36	45.6	1033	116.46
SPAC9E9.04	1	SPAC9E9.04:pep	8	8	8	41	188	21.238
SPAC1486.05	1	SPAC1486.05:pep	37	37	37	24.9	1807	192.2
SPBC3F6.01c	1	SPBC3F6.01c:pep	18	18	18	42.9	473	53.29
SPCC1223.06	1	SPCC1223.06:pep	14	14	14	19.6	1147	127.43
SPAC630.08c	1	SPAC630.08c:pep	10	10	10	35.3	300	35.802
SPAC15E1.04	1	SPAC15E1.04:pep	18	18	18	43.8	625	69.893
SPBC776.02c	1	SPBC776.02c:pep	15	14	14	63.6	327	37.636
SPCC70.02c	1	SPCC70.02c:pep	5	5	5	48.9	90	10.674
SPBC12C2.08	1	SPBC12C2.08:pep	22	21	21	35.6	781	87.008
SPAC17G8.04c	1	SPAC17G8.04c:pep	9	9	9	92.1	152	16.91
SPCC1620.08	1	SPCC1620.08:pep	19	19	19	56.4	433	47.287
SPBC16G5.01	1	SPBC16G5.01:pep	14	14	14	55.6	270	30.899
SPBC4B4.04	1	SPBC4B4.04:pep	30	30	30	58.9	576	63.496
SPBC14C8.06	1	SPBC14C8.06:pep	15	15	15	51.7	377	41.596
SPBC12C2.05c	1	SPBC12C2.05c:pep	17	17	17	31.2	642	72.216
SPAC17H9.11	1	SPAC17H9.11:pep	7	7	7	68.8	141	16.281
SPBC19G7.03c;SPAC19B12.04	2	SPBC19G7.03c:pep;SPAC19B12.04:pep	3;3	3;3	3;3	34.4	61;61	6.9101
SPAC1F5.03c	1	SPAC1F5.03c:pep	13	13	13	46.3	382	41.501
SPAC20G4.01	1	SPAC20G4.01:pep	13	13	13	50.7	280	31.292
SPBC4C3.05c	1	SPBC4C3.05c:pep	51	51	50	39.3	1689	189.24
SPCPB1C11.01	1	SPCPB1C11.01:pep	11	11	11	21.7	497	53.386
SPAC16E8.15	1	SPAC16E8.15:pep	9	9	9	38.5	218	24.958
SPBC21D10.11c	1	SPBC21D10.11c:pep	18	18	18	48.5	501	55.543
SPCC4B3.06c	1	SPCC4B3.06c:pep	14	14	14	78	200	22.124
SPBC646.04	1	SPBC646.04:pep	19	19	19	46.3	566	64.108
SPBC776.11	1	SPBC776.11:pep	11	3	3	63.5	148	16.685
SPAC30C2.08	1	SPAC30C2.08:pep	20	20	20	47.5	457	52.69
SPAC26F1.14c	1	SPAC26F1.14c:pep	29	29	29	57.8	611	66.565
SPCC1682.05c	1	SPCC1682.05c:pep	24	24	24	40.5	597	67.859
SPAC1F3.06c	1	SPAC1F3.06c:pep	71	71	71	41.5	1957	222.78
SPCC794.11c	1	SPCC794.11c:pep	18	18	18	39.1	476	51.751
SPCC1795.05c	1	SPCC1795.05c:pep	10	10	10	52.9	191	21.716
SPCC162.03	1	SPCC162.03:pep	11	11	11	44.9	292	32.614
SPAC6G9.03c	1	SPAC6G9.03c:pep	5	5	5	15.2	376	42.418
SPAC607.03c	1	SPAC607.03c:pep	4	4	4	50.4	125	13.535
SPAC890.06	1	SPAC890.06:pep	41	41	41	41.4	1315	147.63
SPCC31H12.03c	1	SPCC31H12.03c:pep	14	14	14	46.5	245	26.781
SPAC1705.03c	1	SPAC1705.03c:pep	3	3	3	9.3	421	43.345
SPAC1142.07c	1	SPAC1142.07c:pep	11	11	11	44.1	222	25.301
SPBC16E9.16c	1	SPBC16E9.16c:pep	25	25	25	37.6	756	82.221
SPBC29A10.01	1	SPBC29A10.01:pep	24	24	24	44	678	76.774
SPBC1347.02	1	SPBC1347.02:pep	13	13	13	41.3	361	39.301
SPCC1393.13	1	SPCC1393.13:pep	18	17	17	43.2	442	50.117
SPBC16H5.11c	1	SPBC16H5.11c:pep	23	23	23	43.4	645	73.166
SPAC57A10.09c	1	SPAC57A10.09c:pep	7	7	7	57.4	108	12.361
SPAC1805.06c	1	SPAC1805.06c:pep	17	17	17	59.3	329	36.12
SPACUNK4.15	1	SPACUNK4.15:pep	12	12	12	72.1	208	23.655
SPBC1271.02	1	SPBC1271.02:pep	19	19	19	29.4	752	84.973
SPCC1840.03	1	SPCC1840.03:pep	24	24	24	30	1095	121.87
SPBC24C6.05	1	SPBC24C6.05:pep	13	13	13	50.3	288	31.774
SPAC1F3.05	1	SPAC1F3.05:pep	13	13	13	30.8	510	56.789
SPBC28F2.12	1	SPBC28F2.12:pep	37	36	36	29.9	1752	194.16
SPBC215.10	1	SPBC215.10:pep	9	9	9	29.1	302	33.261
SPBC409.20c	1	SPBC409.20c:pep	6	6	6	21.9	215	24.06
SPAC23A1.14c	1	SPAC23A1.14c:pep	14	14	14	55.5	398	43.284
SPBC15D4.09c	1	SPBC15D4.09c:pep	20	20	20	36.4	610	68.967
SPBC1215.02c	1	SPBC1215.02c:pep	33	33	33	48.6	811	92.456
SPBC106.05c	1	SPBC106.05c:pep	10	10	10	80.4	92	10.711
SPCC1739.12	1	SPCC1739.12:pep	13	13	13	46.9	305	35.259
SPCC338.07c	1	SPCC338.07c:pep	32	32	32	44.6	729	83.677
SPAC1F7.07c	1	SPAC1F7.07c:pep	6	6	6	19.4	397	44.314
SPBC3D6.15;SPAC694.05c	2	SPBC3D6.15:pep;SPAC694.05c:pep	7;7	7;7	7;7	59.1	88;89	9.8194
SPAC806.03c	1	SPAC806.03c:pep	5	4	4	37.5	120	13.876
SPAC1805.05	1	SPAC1805.05:pep	18	18	17	45.6	439	50.214
SPCPB16A4.05c	1	SPCPB16A4.05c:pep	10	10	10	37.8	286	31.33
SPCC74.03c	1	SPCC74.03c:pep	22	22	22	48.4	576	65.995
SPAC9.07c	1	SPAC9.07c:pep	26	26	26	82.5	366	40.375
SPBC19C7.10	1	SPBC19C7.10:pep	20	20	20	48.4	432	47.826
SPAC1B2.03c	1	SPAC1B2.03c:pep	5	5	5	27.2	334	38.337
SPAC16E8.07c	1	SPAC16E8.07c:pep	26	26	26	46.5	831	94.158
SPBC365.12c	1	SPBC365.12c:pep	21	21	21	36.5	684	75.698
SPBC30D10.17c	1	SPBC30D10.17c:pep	13	13	13	28.6	504	55.557
SPBC776.07	1	SPBC776.07:pep	9	9	9	41.6	269	30.616
SPAC6G9.12	1	SPAC6G9.12:pep	24	24	24	58.4	620	67.23
SPBC19G7.17	1	SPBC19G7.17:pep	9	9	9	18.7	475	52.438
SPAC144.02	1	SPAC144.02:pep	4	4	4	20.9	249	28.348
SPAC227.07c	1	SPAC227.07c:pep	17	17	17	51.2	463	52.795
SPCC830.10	1	SPCC830.10:pep	14	14	14	75	188	20.978
SPCC663.15c	1	SPCC663.15c:pep	27	27	27	46.5	678	77.086
SPBC13E7.04	1	SPBC13E7.04:pep	8	8	8	59.9	167	18.41
SPBC800.10c	1	SPBC800.10c:pep	34	34	34	46.2	1116	120.54
SPBC29A3.10c	1	SPBC29A3.10c:pep	7	7	7	63.1	103	11.57
SPCC830.08c	1	SPCC830.08c:pep	5	5	5	24.7	182	20.782
SPCC338.05c	1	SPCC338.05c:pep	9	9	9	46	139	15.554
SPCC965.03	1	SPCC965.03:pep	13	13	13	44.2	285	32.219
SPBC1271.14	1	SPBC1271.14:pep	15	15	15	42.9	445	47.287
SPCC830.07c	1	SPCC830.07c:pep	25	25	25	71.2	379	40.259
SPAC17C9.12	1	SPAC17C9.12:pep	10	10	10	40.4	319	34.005
SPBC16C6.02c	1	SPBC16C6.02c:pep	53	53	53	22	3004	339.01
SPAC26A3.15c	1	SPAC26A3.15c:pep	24	24	24	57	598	60.73
SPCC191.07	2	SPCC191.07:pep;CON__P62894	8;1	8;1	8;1	51.4	109;105	12.021
SPAC4G9.13c	1	SPAC4G9.13c:pep	13	13	13	47.7	298	35.779
SPBC887.04c	1	SPBC887.04c:pep	22	22	22	38.9	718	79.221
SPBC1685.02c	1	SPBC1685.02c:pep	9	5	5	65.5	148	15.871
SPBC215.01	1	SPBC215.01:pep	24	24	24	33.9	834	95.005
SPBC56F2.04	1	SPBC56F2.04:pep	39	39	39	17.1	2493	285.22
SPBC21C3.09c	1	SPBC21C3.09c:pep	9	9	9	60.6	221	24.173
SPCC584.11c	1	SPCC584.11c:pep	17	17	17	54.5	380	42.961
SPBC16H5.10c	1	SPBC16H5.10c:pep	28	28	27	43.4	735	83.803
SPAC17A2.02c	1	SPAC17A2.02c:pep	6	6	6	20	290	33.042
SPAC22H12.01c	1	SPAC22H12.01c:pep	15	15	15	64.1	234	27.521
SPAC4F8.12c	1	SPAC4F8.12c:pep	51	51	51	25.8	2363	274.55
SPAC12B10.02c	1	SPAC12B10.02c:pep	10	10	10	53.6	235	26.934
SPBC16E9.09c	1	SPBC16E9.09c:pep	10	10	10	47.4	215	24.845
SPAC3G6.05	1	SPAC3G6.05:pep	6	6	6	28.6	206	23.409
SPAC20G8.07c	1	SPAC20G8.07c:pep	6	6	6	21	219	24.671
SPBC6B1.08c	1	SPBC6B1.08c:pep	18	18	18	41.4	515	59.177
SPAC17C9.10	1	SPAC17C9.10:pep	3	3	3	10.3	271	30.614
SPAC24H6.13	1	SPAC24H6.13:pep	24	24	24	33.6	871	98.441
SPCC1020.10	1	SPCC1020.10:pep	8	8	8	13.1	650	73.231
SPCC320.13c	1	SPCC320.13c:pep	5	5	5	16.3	355	40.596
SPAC824.07	1	SPAC824.07:pep	10	10	10	52	256	28.483
SPBC800.04c	1	SPBC800.04c:pep	7	7	4	58.5	94	10.422
SPBC27B12.08	1	SPBC27B12.08:pep	40	40	40	24.9	1919	217.69
SPBC2A9.09	1	SPBC2A9.09:pep	14	14	14	67	233	26.246
SPAC17C9.09c	1	SPAC17C9.09c:pep	6	6	6	66.3	95	10.742
SPAC1F7.08	1	SPAC1F7.08:pep	10	10	10	21.2	622	69.907
SPBC1271.07c	1	SPBC1271.07c:pep	7	7	7	55.2	163	18.478
SPAC4C5.01	1	SPAC4C5.01:pep	11	11	11	59.8	249	27.382
SPBC29A3.01	1	SPBC29A3.01:pep	17	17	17	30.1	904	97.894
SPAC19G12.03	1	SPAC19G12.03:pep	12	12	12	60	320	36.206
SPAC1851.02	1	SPAC1851.02:pep	11	11	11	45.5	279	31.393
SPCC417.09c	1	SPCC417.09c:pep	2	2	2	3.5	767	87.387
SPAC9E9.07c	1	SPAC9E9.07c:pep	10	9	9	67.5	200	22.755
SPBC1271.04c	1	SPBC1271.04c:pep	16	16	16	56.6	350	38.811
SPBC405.04c	1	SPBC405.04c:pep	11	11	10	66.8	205	22.994
SPBC119.03	1	SPBC119.03:pep	15	15	14	67.7	266	30.266
SPBC14F5.13c	1	SPBC14F5.13c:pep	13	13	13	27.4	532	58.666
SPAC18G6.07c	1	SPAC18G6.07c:pep	18	18	18	57.1	359	39.775
SPAPB17E12.11	1	SPAPB17E12.11:pep	8	8	8	30.7	309	34.983
SPAC1F7.02c	1	SPAC1F7.02c:pep	25	25	25	51	578	65.261
SPCC576.11	1	SPCC576.11:pep	16	1	1	57.7	201	23.806
SPBC1604.08c	1	SPBC1604.08c:pep	18	18	18	54.5	539	59.852
SPBC543.09	1	SPBC543.09:pep	20	20	20	32.6	773	85.368
SPCC1494.05c	1	SPCC1494.05c:pep	29	29	29	34.8	979	111.97
SPBC16H5.07c	1	SPBC16H5.07c:pep	14	14	13	62.7	322	36.489
SPBC1685.14c	1	SPBC1685.14c:pep	22	22	22	33.7	801	92.426
SPAC23C4.08	1	SPAC23C4.08:pep	8	7	7	39	205	22.501
SPAC24B11.06c	1	SPAC24B11.06c:pep	11	11	11	37.8	349	40.222
SPACUNK4.17	1	SPACUNK4.17:pep	15	14	14	48.3	406	45.755
SPBC27.01c	1	SPBC27.01c:pep	5	5	5	47.7	132	15.636
SPBC13G1.11	1	SPBC13G1.11:pep	8	8	8	31	197	22.651
SPBC16H5.13	1	SPBC16H5.13:pep	5	5	5	6.4	1026	115.55
SPBC9B6.11c	1	SPBC9B6.11c:pep	13	13	13	34.7	502	57.65
SPAC17H9.13c	1	SPAC17H9.13c:pep	16	16	16	50.2	402	43.933
SPBC2D10.05	1	SPBC2D10.05:pep	15	15	15	43.3	464	53.701
SPCC794.03	1	SPCC794.03:pep	13	13	13	27.4	554	60.857
SPBC14C8.02	1	SPBC14C8.02:pep	24	24	24	58.8	427	48.549
SPAC167.05	1	SPAC167.05:pep	16	16	16	37.6	601	65.947
SPCC553.06	1	SPCC553.06:pep	5	5	5	25.1	271	29.329
SPBC1773.17c	1	SPBC1773.17c:pep	14	14	14	47.9	340	37.658
SPAC17G6.15c	1	SPAC17G6.15c:pep	17	17	17	53.7	322	35.447
SPBC1289.07c	1	SPBC1289.07c:pep	15	15	15	47.7	348	39.154
SPAC13A11.01c	1	SPAC13A11.01c:pep	29	29	29	48.6	777	88.207
SPCC16A11.02	1	SPCC16A11.02:pep	20	20	20	39.4	777	85.871
SPAC30.01c	1	SPAC30.01c:pep	44	44	44	30.5	1822	206.8
SPAC343.09	1	SPAC343.09:pep	20	20	20	80.2	410	44.896
SPBC354.02c	1	SPBC354.02c:pep	8	8	8	15.9	479	53.253
SPBC21D10.09c	1	SPBC21D10.09c:pep	30	30	30	24	1610	184.37
SPAC17H9.12c	1	SPAC17H9.12c:pep	16	16	16	73.3	266	29.375
SPBC32H8.03	1	SPBC32H8.03:pep	10	10	10	39.5	299	33.133
SPAC644.13c	1	SPAC644.13c:pep	6	6	6	28.4	225	25.309
SPBC83.16c	1	SPBC83.16c:pep	17	17	17	31.8	563	63.484
SPBC609.05	1	SPBC609.05:pep	23	23	23	51.2	512	57.456
SPAC4G9.11c	1	SPAC4G9.11c:pep	10	10	10	35.4	223	26.304
SPAC4D7.09	1	SPAC4D7.09:pep	18	18	18	48.9	458	50.461
SPAC5H10.01	1	SPAC5H10.01:pep	11	11	11	50.8	301	33.756
SPAC6G10.07	1	SPAC6G10.07:pep	24	24	24	43.5	780	90.077
SPBC21B10.04c	1	SPBC21B10.04c:pep	3	3	3	16.4	122	13.388
SPBC1198.04c	1	SPBC1198.04c:pep	7	7	7	10.6	897	102.82
SPBP23A10.07	1	SPBP23A10.07:pep	33	33	33	36.6	1174	131.69
SPAC56F8.10	1	SPAC56F8.10:pep	27	27	27	48.3	603	69.011
SPBC337.10c	1	SPBC337.10c:pep	10	10	10	41.3	288	31.534
SPCC18B5.07c	1	SPCC18B5.07c:pep	15	15	15	27.7	549	59.165
SPAC25H1.10c	1	SPAC25H1.10c:pep	3	3	3	38.2	68	7.7199
SPBC8D2.02c	1	SPBC8D2.02c:pep	4	4	4	24.7	170	18.816
SPBC19G7.10c	1	SPBC19G7.10c:pep	23	23	23	32.5	754	84.116
SPAC1565.01	1	SPAC1565.01:pep	13	13	13	53.3	242	27.052
SPAC1B3.14	1	SPAC1B3.14:pep	2	2	2	11.2	161	16.325
SPAC22E12.10c	1	SPAC22E12.10c:pep	12	12	12	23.1	616	68.583
SPBP23A10.16	1	SPBP23A10.16:pep	5	5	5	28.9	159	17.744
SPCC777.13	1	SPCC777.13:pep	27	27	27	38.4	836	96.407
SPAC959.07	1	SPAC959.07:pep	27	3	3	67.6	262	29.674
SPBC1734.04	1	SPBC1734.04:pep	17	17	17	48.8	430	48.99
SPBP23A10.08	1	SPBP23A10.08:pep	17	17	17	40.6	433	48.772
SPAC17A5.14	1	SPAC17A5.14:pep	35	35	35	30.9	1328	152.59
SPAC14C4.04	1	SPAC14C4.04:pep	11	11	11	49.4	267	29.71
SPBC16E9.02c	1	SPBC16E9.02c:pep	27	27	27	52.5	569	63.725
SPBC26H8.06	1	SPBC26H8.06:pep	8	8	8	45.1	244	27.099
SPBC1773.14	1	SPBC1773.14:pep	18	16	16	49.5	461	51.738
SPBC1709.11c	1	SPBC1709.11c:pep	2	2	2	7.5	305	34.876
SPCC1795.02c	1	SPCC1795.02c:pep	3	3	3	10.2	412	45.108
SPBC776.04	1	SPBC776.04:pep	24	23	23	36.3	765	85.381
SPBC337.09	1	SPBC337.09:pep	4	4	4	27.2	136	15.252
SPBC1289.05c	1	SPBC1289.05c:pep	12	12	12	72.2	108	12.162
SPCC965.12	1	SPCC965.12:pep	17	17	17	61.8	416	47.42
SPBC21C3.14c	1	SPBC21C3.14c:pep	22	22	22	30.9	841	94.027
SPBPB2B2.06c	1	SPBPB2B2.06c:pep	10	7	7	20	601	68.417
SPBC4F6.16c	1	SPBC4F6.16c:pep	14	14	14	40.3	467	54.625
SPAC1002.03c	1	SPAC1002.03c:pep	25	25	25	29.9	923	106.28
SPCC4B3.05c	1	SPCC4B3.05c:pep	12	12	12	37.3	359	40.633
SPBC19F5.05c	1	SPBC19F5.05c:pep	19	19	19	42.8	607	69.188
SPAC4F10.11	1	SPAC4F10.11:pep	14	14	14	34.8	469	53.737
SPAC1782.06c	1	SPAC1782.06c:pep	13	13	13	57.4	282	31.053
SPBC23G7.10c	1	SPBC23G7.10c:pep	17	17	17	51.6	395	43.683
SPAC26F1.04c	1	SPAC26F1.04c:pep	13	13	13	46.5	372	41.229
SPAC15E1.05c	1	SPAC15E1.05c:pep	12	12	12	49.9	365	41.556
SPAC22A12.10	1	SPAC22A12.10:pep	6	6	6	14.2	386	44.083
SPCC576.14	1	SPCC576.14:pep	9	9	9	41.7	283	32.043
SPBC216.03	1	SPBC216.03:pep	13	13	13	56.3	247	27.209
SPBC11C11.02	1	SPBC11C11.02:pep	25	25	25	47.3	670	75.166
SPAC8F11.10c	1	SPAC8F11.10c:pep	12	12	12	31.2	401	44.871
SPAC23G3.12c	1	SPAC23G3.12c:pep	32	32	32	40.2	996	110.41
SPCC962.03c	1	SPCC962.03c:pep	17	17	17	40.2	542	60.425
SPAC16E8.17c	1	SPAC16E8.17c:pep	13	13	13	49.5	331	34.706
SPAC19D5.04	1	SPAC19D5.04:pep	51	51	51	20.2	3227	365.03
SPBC1718.04	1	SPBC1718.04:pep	17	17	17	29.3	675	76.627
SPAC1250.05	1	SPAC1250.05:pep	8	8	8	64.1	117	12.242
SPBC3E7.07c	1	SPBC3E7.07c:pep	10	10	10	76.2	147	17.405
SPAC4A8.12c	1	SPAC4A8.12c:pep	13	13	13	45.2	332	38.066
SPCC4G3.04c	1	SPCC4G3.04c:pep	14	14	14	52.5	305	33.887
SPAC4D7.01c	1	SPAC4D7.01c:pep	32	32	31	22.5	1811	206.93
SPBC30B4.05	1	SPBC30B4.05:pep	23	23	23	25.7	967	109.42
SPCC14G10.04	1	SPCC14G10.04:pep	18	18	18	51.3	497	52.624
SPBC3D6.12	1	SPBC3D6.12:pep	25	25	25	38.5	922	103.43
SPBC29A10.04	1	SPBC29A10.04:pep	13	13	13	14.7	1228	140.52
SPAC23D3.12	1	SPAC23D3.12:pep	13	13	13	23.6	559	62.315
SPBC3H7.01	1	SPBC3H7.01:pep	12	12	12	37.7	395	45.077
SPBC26H8.10	1	SPBC26H8.10:pep	30	30	30	35.9	970	110.14
SPBC17A3.05c	1	SPBC17A3.05c:pep	14	14	14	36	403	46.399
SPCC645.04	1	SPCC645.04:pep	4	4	4	14.9	328	37.276
SPAC1F8.03c	1	SPAC1F8.03c:pep	9	9	9	16.3	630	70.557
SPBC11B10.01	1	SPBC11B10.01:pep	17	17	17	38.1	506	57.166
SPAC27F1.06c	1	SPAC27F1.06c:pep	17	17	17	52.2	362	40.54
SPAC6G9.07c	1	SPAC6G9.07c:pep	10	10	10	68.5	168	19.614
SPAC1782.10c	1	SPAC1782.10c:pep	6	6	6	42.9	154	17.178
SPCC306.02c	1	SPCC306.02c:pep	8	8	8	38	171	18.84
SPBC23G7.05	1	SPBC23G7.05:pep	6	6	6	70.6	109	12.434
SPCC285.17	1	SPCC285.17:pep	19	19	19	67.4	233	26.651
SPCC18.15	1	SPCC18.15:pep	16	16	16	60.1	326	37.04
SPCC1919.09	1	SPCC1919.09:pep	8	8	8	54.9	244	26.232
SPBC354.01	1	SPBC354.01:pep	25	25	25	63.4	363	40.749
SPCC1322.08	1	SPCC1322.08:pep	18	18	18	40	580	66.135
SPAC15A10.16	1	SPAC15A10.16:pep	29	29	29	31.8	1385	154.32
SPBC23E6.01c	1	SPBC23E6.01c:pep	8	8	8	28.5	473	51.704
SPAPB8E5.03	1	SPAPB8E5.03:pep	6	6	6	16	438	49.304
SPBC31E1.02c	1	SPBC31E1.02c:pep	26	26	26	44.3	899	98.358
SPCC290.03c	1	SPCC290.03c:pep	31	31	31	25	1647	186.41
SPAC4F8.03	1	SPAC4F8.03:pep	18	18	18	60.6	246	28.075
SPCC1235.15	1	SPCC1235.15:pep	14	14	14	39.7	345	39.485
SPCC1322.09	1	SPCC1322.09:pep	14	14	14	44.8	455	50.886
SPAPB8E5.07c	1	SPAPB8E5.07c:pep	34	34	34	36.9	1163	130.53
SPBC800.09	1	SPBC800.09:pep	14	14	14	35.2	426	46.224
SPAC23C4.09c	1	SPAC23C4.09c:pep	6	6	6	60.3	131	15.042
SPAC926.08c	1	SPAC926.08c:pep	14	14	14	50.8	317	36.071
SPBC32F12.12c	1	SPBC32F12.12c:pep	4	4	4	25.6	164	17.922
SPAC30C2.02	1	SPAC30C2.02:pep	20	20	20	76.7	318	35.689
SPBC13A2.04c	1	SPBC13A2.04c:pep	13	13	13	23.1	618	68.499
SPAC1F3.09	1	SPAC1F3.09:pep	15	15	15	31	561	63.216
SPAC19B12.01	1	SPAC19B12.01:pep	29	29	29	45.7	817	94.268
SPBC16E9.10c	1	SPBC16E9.10c:pep	13	13	13	24.5	779	86.178
SPBC21C3.01c	1	SPBC21C3.01c:pep	3	3	3	1.4	3071	354.01
SPAC6C3.08	1	SPAC6C3.08:pep	11	11	11	55.6	234	25.93
SPCC1682.14	1	SPCC1682.14:pep	15	1	1	46.6	193	22.753
SPAC22F8.09	1	SPAC22F8.09:pep	10	10	10	33.9	419	48.129
SPCC1672.12c	1	SPCC1672.12c:pep	12	12	12	44.6	303	34.352
SPAC4A8.14	1	SPAC4A8.14:pep	15	15	15	46.5	409	45.352
SPBC3E7.14	1	SPBC3E7.14:pep	7	7	7	73.1	78	8.66
SPBC3E7.10	1	SPBC3E7.10:pep	16	16	16	51.2	379	42.139
SPCC594.02c	1	SPCC594.02c:pep	14	14	14	35.4	489	54.866
SPAC2F3.06c	1	SPAC2F3.06c:pep	18	18	18	20.7	910	101.72
SPBC8D2.10c	1	SPBC8D2.10c:pep	18	18	18	34.6	543	61.76
SPBC409.05	1	SPBC409.05:pep	13	13	13	68.9	161	18.772
SPBC1773.02c	1	SPBC1773.02c:pep	7	7	7	47.2	195	21.164
SPAC5D6.13	1	SPAC5D6.13:pep	11	11	11	35	337	38.375
SPAC1687.15	1	SPAC1687.15:pep	11	10	10	32.3	387	44.165
SPBC36.07	1	SPBC36.07:pep	29	29	29	26.2	1253	141.61
SPAC16E8.01	1	SPAC16E8.01:pep	28	28	28	31	1420	154.63
SPAP11E10.01	1	SPAP11E10.01:pep	13	13	13	58.2	330	35.799
SPCC1259.02c	1	SPCC1259.02c:pep	9	9	9	15.1	822	91.841
SPAC328.06	1	SPAC328.06:pep	29	29	29	28.5	1141	130.3
SPAC17G6.09	1	SPAC17G6.09:pep	10	10	10	34.1	273	31.585
SPBC577.06c	1	SPBC577.06c:pep	33	33	33	24.8	1877	213.96
SPAC1F5.11c	1	SPAC1F5.11c:pep	21	21	21	6.8	3655	420.78
SPCC737.08	1	SPCC737.08:pep	56	56	56	17.4	4717	537.78
SPAC27D7.07c	1	SPAC27D7.07c:pep	4	4	4	57.3	117	13.089
SPAC23A1.15c	1	SPAC23A1.15c:pep	6	6	6	37.2	226	26.289
SPCP1E11.05c	1	SPCP1E11.05c:pep	7	7	7	18.2	472	55.156
SPBC11B10.09	1	SPBC11B10.09:pep	10	10	10	26.9	297	34.358
SPAC17H9.09c	1	SPAC17H9.09c:pep	9	9	9	53.4	219	24.734
SPCC4G3.14	1	SPCC4G3.14:pep	16	16	16	31.4	528	57.188
SPAPB2B4.07	1	SPAPB2B4.07:pep	10	10	10	41.8	239	26.697
SPBC409.13	1	SPBC409.13:pep	11	11	11	79.2	159	17.188
SPAC6G9.04	1	SPAC6G9.04:pep	3	3	3	2.7	1318	150.94
SPCC553.02	1	SPCC553.02:pep	20	20	20	35.3	700	79.519
SPAC732.02c	1	SPAC732.02c:pep	16	16	16	52.2	408	46.947
SPAC16C9.03	1	SPAC16C9.03:pep	15	15	15	34.5	498	56.55
SPCC188.06c	1	SPCC188.06c:pep	19	19	19	41.6	522	56.697
SPAC2C4.03c	1	SPAC2C4.03c:pep	6	6	6	57.4	115	13.095
SPACUNK4.12c	1	SPACUNK4.12c:pep	27	27	27	35.2	969	112.14
SPCC1682.02c	1	SPCC1682.02c:pep	27	27	27	38.8	879	97.48
SPAP7G5.06	1	SPAP7G5.06:pep	12	12	12	22.3	583	64.081
SPBC4F6.13c	1	SPBC4F6.13c:pep	19	19	19	39.9	740	82.944
SPBC660.13c	1	SPBC660.13c:pep	26	26	26	52.9	609	68.196
SPBC30D10.02	1	SPBC30D10.02:pep	11	11	11	65.2	161	18.326
SPAC13C5.04	1	SPAC13C5.04:pep	11	11	11	59.3	248	28.003
SPAC3H5.10	1	SPAC3H5.10:pep	7	1	1	44.1	127	14.458
SPCC31H12.05c	1	SPCC31H12.05c:pep	16	16	14	56.8	322	36.829
SPAC4H3.09	1	SPAC4H3.09:pep	1	1	1	15.2	112	12.519
SPAC27D7.06	1	SPAC27D7.06:pep	11	11	11	33.4	341	36.393
SPAC1F7.11c	1	SPAC1F7.11c:pep	11	11	11	18.4	782	89.377
SPAC8C9.03	1	SPAC8C9.03:pep	16	16	16	59	412	46.468
SPAC25A8.01c	1	SPAC25A8.01c:pep	27	27	27	33.8	922	104.5
SPMIT.05	1	SPMIT.05:pep	4	4	4	9.3	387	43.736
SPBC2F12.05c	1	SPBC2F12.05c:pep	37	37	37	39.3	1310	148.47
SPAC11G7.02	1	SPAC11G7.02:pep	21	21	17	32.6	767	87.267
SPAC13G6.03	1	SPAC13G6.03:pep	14	14	14	22.2	758	85.645
SPBC83.01	1	SPBC83.01:pep	22	22	22	33.2	829	91.118
SPBC530.03c	1	SPBC530.03c:pep	10	10	10	54.9	206	23.325
SPAC323.07c	1	SPAC323.07c:pep	4	4	4	9.2	533	58.597
SPAC343.14c	1	SPAC343.14c:pep	17	17	17	61.8	393	43.221
SPAC16E8.04c	1	SPAC16E8.04c:pep	11	11	11	53	251	29.05
SPAC11E3.13c	1	SPAC11E3.13c:pep	7	7	7	13.5	510	53.692
SPAC17C9.08	1	SPAC17C9.08:pep	11	11	11	46.9	322	36.428
SPBC557.03c	1	SPBC557.03c:pep	21	21	21	55.8	539	58.349
SPAC17G6.10	1	SPAC17G6.10:pep	20	20	20	47.1	527	59.638
SPBC11B10.04c	1	SPBC11B10.04c:pep	4	4	4	14.6	288	33.952
SPAC4F10.13c	1	SPAC4F10.13c:pep	31	31	31	39.8	992	106.14
SPBC3B8.04c	1	SPBC3B8.04c:pep	14	14	14	20	867	97.049
SPAC222.09	1	SPAC222.09:pep	16	16	16	37.7	620	66.439
SPAPJ760.02c	1	SPAPJ760.02c:pep	21	21	21	36.2	857	91.136
SPAC6F12.16c	1	SPAC6F12.16c:pep	27	27	25	28.5	1117	126.19
SPBC119.17	1	SPBC119.17:pep	32	32	32	36.3	992	111.4
SPBC17G9.08c	1	SPBC17G9.08c:pep	18	18	18	25.6	870	99.081
SPBC8D2.12c	1	SPBC8D2.12c:pep	7	7	7	29.4	293	32.926
SPBC16G5.08	1	SPBC16G5.08:pep	12	12	12	47.7	354	37.556
SPAC323.04	1	SPAC323.04:pep	17	17	17	42.1	487	54.841
SPAC4G9.20c	1	SPAC4G9.20c:pep	9	9	9	42.6	298	32.743
SPAC13G7.01c	1	SPAC13G7.01c:pep	18	18	18	27.9	721	82.818
SPBC2F12.03c	1	SPBC2F12.03c:pep	9	9	9	11.3	891	98.567
SPBC56F2.11	1	SPBC56F2.11:pep	14	14	14	39.7	501	55.499
SPBC337.16	1	SPBC337.16:pep	4	4	4	17.6	221	24.767
SPAC3H8.02	1	SPAC3H8.02:pep	20	20	20	55.9	444	51.473
SPBC800.06	1	SPBC800.06:pep	13	13	13	47.5	295	33.899
SPBC3F6.04c	1	SPBC3F6.04c:pep	12	12	12	19	827	95.151
SPBC146.12	1	SPBC146.12:pep	12	12	12	21.7	479	53.574
SPAC824.08	1	SPAC824.08:pep	11	11	11	34.4	556	61.588
SPAC6F12.06	1	SPAC6F12.06:pep	10	10	10	64.4	205	23.031
SPAC1687.01	1	SPAC1687.01:pep	8	8	8	91.2	125	13.721
SPCPJ732.01	1	SPCPJ732.01:pep	16	16	16	38	576	64.23
SPBC1709.18	1	SPBC1709.18:pep	10	10	10	44.4	243	27.653
SPCC663.06c	1	SPCC663.06c:pep	9	7	5	47.4	253	27.783
SPBC660.15	1	SPBC660.15:pep	20	20	20	47.9	474	52.818
SPBC19G7.15	1	SPBC19G7.15:pep	15	15	15	40.7	403	44.483
SPAC821.06	1	SPAC821.06:pep	15	15	15	59.5	331	38.129
SPAC1952.08c	1	SPAC1952.08c:pep	9	9	9	55.8	190	21.653
SPAPB24D3.06c	1	SPAPB24D3.06c:pep	12	12	12	49.7	316	34.734
SPAC589.12	1	SPAC589.12:pep	17	17	17	20.7	971	110.03
SPAC630.14c	1	SPAC630.14c:pep	18	18	18	37.8	598	65.56
SPBC16A3.05c	1	SPBC16A3.05c:pep	16	16	16	61.1	352	38.626
SPBC29A10.07	1	SPBC29A10.07:pep	23	23	23	25	1250	139.58
SPBC725.05c	1	SPBC725.05c:pep	9	9	9	20.4	485	55.148
SPBC13G1.09	1	SPBC13G1.09:pep	15	15	15	47	449	51.365
SPBC409.21	1	SPBC409.21:pep	9	9	9	50.5	192	22.135
SPCC16C4.09	1	SPCC16C4.09:pep	19	19	19	26.5	1066	117.6
SPCC1494.04c	1	SPCC1494.04c:pep	19	19	19	57.5	431	48.905
SPAC3H8.07c	1	SPAC3H8.07c:pep	11	11	11	58	169	19.445
SPBC2G2.08	1	SPBC2G2.08:pep	32	31	31	46.1	972	105.76
SPAC4A8.02c	1	SPAC4A8.02c:pep	6	6	6	53.5	142	15.88
SPCC11E10.07c	1	SPCC11E10.07c:pep	14	14	14	49.6	341	37.773
SPCC1322.16	1	SPCC1322.16:pep	13	13	13	49.7	288	32.338
SPBC1A4.09	1	SPBC1A4.09:pep	22	22	22	44.9	680	76.437
SPBC20F10.05	1	SPBC20F10.05:pep	2	2	2	2.9	972	113.25
SPBP16F5.05c	1	SPBP16F5.05c:pep	8	8	8	70.5	146	16.28
SPBC56F2.15	1	SPBC56F2.15:pep	6	6	6	69.5	95	10.171
SPAC1486.06	1	SPAC1486.06:pep	19	19	19	56.6	410	46.694
SPAPB2B4.02	1	SPAPB2B4.02:pep	6	6	6	46.6	146	16.533
SPBC115.03	1	SPBC115.03:pep	15	15	15	37	368	41.271
SPBC800.12c	1	SPBC800.12c:pep	5	5	5	46	137	15.303
SPCC330.08	1	SPCC330.08:pep	13	13	13	33.3	471	53.277
SPAC23C4.05c	1	SPAC23C4.05c:pep	15	15	15	29.7	431	49.532
SPBC1306.01c	1	SPBC1306.01c:pep	21	21	21	33.8	770	86.324
SPAC8C9.15c	1	SPAC8C9.15c:pep	21	21	21	34.7	678	76.325
SPAC3G6.02	1	SPAC3G6.02:pep	2	2	2	87.3	71	8.1105
SPAC4G9.15	1	SPAC4G9.15:pep	12	12	12	48.1	341	37.307
SPBC21B10.03c	1	SPBC21B10.03c:pep	16	16	16	31.9	791	85.523
SPAC15A10.01	1	SPAC15A10.01:pep	20	20	20	34.3	693	77.055
SPBC21C3.12c	1	SPBC21C3.12c:pep	9	9	9	71.8	124	13.932
SPBC216.07c	1	SPBC216.07c:pep	35	35	34	18.6	2337	266.38
SPAC1565.05	1	SPAC1565.05:pep	22	22	22	31.2	773	86.679
SPBC215.12	1	SPBC215.12:pep	29	28	28	34.1	984	111.31
SPAC29A4.18	1	SPAC29A4.18:pep	15	15	15	54.5	431	48.476
SPAC3A11.10c	1	SPAC3A11.10c:pep	13	13	13	47.9	409	46.047
SPAC1002.12c	1	SPAC1002.12c:pep	18	18	17	43.3	547	58.833
SPBC651.02	1	SPBC651.02:pep	11	11	11	48.6	276	30.421
SPCC645.05c	1	SPCC645.05c:pep	29	29	29	22	1526	176.43
SPBC4B4.08	1	SPBC4B4.08:pep	7	7	7	16.9	531	58.845
SPAC1486.08	1	SPAC1486.08:pep	5	5	5	41.6	113	13.691
SPBP4H10.17c	1	SPBP4H10.17c:pep	11	11	11	39	341	38.092
SPAC1002.19	1	SPAC1002.19:pep	18	18	18	47.6	439	49.034
SPAC1039.09	1	SPAC1039.09:pep	10	10	10	16.6	580	63.849
SPCC330.12c	1	SPCC330.12c:pep	4	4	4	35	180	20.136
SPAC4H3.01	1	SPAC4H3.01:pep	22	22	22	56.4	392	44.768
SPBC27B12.03c	1	SPBC27B12.03c:pep	6	6	6	20.4	329	39.063
SPAC227.13c	1	SPAC227.13c:pep	9	9	9	55.2	192	20.616
SPBC577.08c	1	SPBC577.08c:pep	11	11	11	51	290	31.889
SPBC4F6.06	1	SPBC4F6.06:pep	17	17	17	23.9	891	98.748
SPCC1739.09c	1	SPCC1739.09c:pep	4	4	4	29.2	130	15.199
SPBC16C6.09	1	SPBC16C6.09:pep	14	14	14	23.1	778	90.09
SPAC9.10	1	SPAC9.10:pep	10	10	10	21	591	65.069
SPBP4H10.20	1	SPBP4H10.20:pep	13	13	13	39.1	304	35.106
SPAC644.08	1	SPAC644.08:pep	10	10	10	58.8	216	24.423
SPCC622.14	1	SPCC622.14:pep	13	13	13	43	321	35.518
SPAC22E12.04	1	SPAC22E12.04:pep	13	13	13	55.2	297	32.243
SPBP8B7.26	1	SPBP8B7.26:pep	10	10	10	37.8	262	27.489
SPBP35G2.12	1	SPBP35G2.12:pep	9	9	9	77.1	205	23.032
SPAC139.01c	1	SPAC139.01c:pep	22	22	22	35.7	802	90.152
SPCC1827.02c	1	SPCC1827.02c:pep	22	22	22	64.6	362	41.75
SPAC17C9.11c	1	SPAC17C9.11c:pep	9	9	9	39.2	240	27.602
SPBC428.14	1	SPBC428.14:pep	10	10	10	30.6	350	41.354
SPBC1826.01c	1	SPBC1826.01c:pep	31	31	31	20.6	1953	217.63
SPBC1711.12	1	SPBC1711.12:pep	15	15	15	27.1	683	77.765
SPBC2D10.09	1	SPBC2D10.09:pep	15	15	15	41	429	47.934
SPBC3E7.02c	1	SPBC3E7.02c:pep	5	5	5	49.7	143	15.968
SPCP31B10.06	1	SPCP31B10.06:pep	21	21	21	23.5	1188	133.68
SPAC19B12.03	1	SPAC19B12.03:pep	28	26	26	19.3	1826	210.83
SPAC15A10.08	1	SPAC15A10.08:pep	15	15	15	29	621	72.442
SPAC11E3.04c	1	SPAC11E3.04c:pep	10	10	10	79.7	148	16.855
SPAC227.10	1	SPAC227.10:pep	7	7	7	65.8	114	13.296
SPAC25B8.09	1	SPAC25B8.09:pep	10	9	9	37.5	251	28.468
SPAC10F6.17c	1	SPAC10F6.17c:pep	12	12	12	38.1	444	49.74
SPAC12B10.16c	1	SPAC12B10.16c:pep	14	14	14	31.8	509	57.153
SPAC5H10.08c	1	SPAC5H10.08c:pep	13	13	13	52.3	283	31.876
SPAC23H4.01c	1	SPAC23H4.01c:pep	23	23	23	31	945	106.81
SPCC777.06c	1	SPCC777.06c:pep	14	14	14	74.1	301	33.805
SPAC21E11.06	1	SPAC21E11.06:pep	10	10	10	34.7	467	51.583
SPBC4B4.09	1	SPBC4B4.09:pep	19	19	19	37.9	612	71.246
SPAC4F10.10c	1	SPAC4F10.10c:pep	12	12	12	40.1	337	38.296
SPCC70.05c	1	SPCC70.05c:pep	14	14	14	21.9	781	85.909
SPCC4B3.03c	1	SPCC4B3.03c:pep	12	12	12	25	679	74.305
SPAC13D6.05	1	SPAC13D6.05:pep	12	12	12	66.2	234	26.672
SPBC1105.07c	1	SPBC1105.07c:pep	7	7	7	20.1	442	50.836
SPCC1919.03c	1	SPCC1919.03c:pep	7	7	7	33.2	298	32.969
SPAC12G12.06c	1	SPAC12G12.06c:pep	15	15	15	52.1	363	39.525
SPBC354.15	1	SPBC354.15:pep	17	17	17	46.4	412	46.319
SPCC825.03c	1	SPCC825.03c:pep	10	10	10	31	284	32.55
SPAC8C9.12c	1	SPAC8C9.12c:pep	7	7	7	28.1	303	32.652
SPBC1709.07	1	SPBC1709.07:pep	10	10	10	34	338	38.724
SPAC1486.04c	1	SPAC1486.04c:pep	45	45	45	32.4	1727	197.86
SPBC428.15	1	SPBC428.15:pep	17	17	17	54.5	409	44.461
SPBC4C3.06	1	SPBC4C3.06:pep	19	19	19	37.9	818	90.756
SPBC1289.16c	1	SPBC1289.16c:pep	22	21	21	36.9	794	90.126
SPCC5E4.03c	1	SPCC5E4.03c:pep	15	15	15	34.1	643	72.38
SPAC56E4.06c	1	SPAC56E4.06c:pep	11	11	11	23.2	611	67.825
SPBC1706.03	1	SPBC1706.03:pep	21	21	21	31.3	758	87.101
SPBC902.04	1	SPBC902.04:pep	11	11	11	21.4	589	66.898
SPAC1782.07	1	SPAC1782.07:pep	7	7	7	54.3	92	10.467
SPAC13G6.10c	1	SPAC13G6.10c:pep	3	3	3	7.2	530	54.21
SPAC19B12.06c	1	SPAC19B12.06c:pep	3	3	3	13.2	258	28.593
SPBC20F10.01	1	SPBC20F10.01:pep	7	7	7	29.4	194	20.131
SPAC26A3.17c	1	SPAC26A3.17c:pep	14	14	14	52.9	357	40.708
SPAC24B11.12c	1	SPAC24B11.12c:pep	25	25	24	24.2	1402	159.35
SPAC23C4.15	1	SPAC23C4.15:pep	8	8	8	42.4	210	23.915
SPAC23C4.19	1	SPAC23C4.19:pep	27	27	27	36	990	109.01
SPAC27D7.11c	1	SPAC27D7.11c:pep	2	2	2	7.6	463	48.392
SPCC285.08	1	SPCC285.08:pep	9	9	9	31.2	240	27.097
SPCC757.12	1	SPCC757.12:pep	7	7	7	17.1	625	68.086
SPBC26H8.02c	1	SPBC26H8.02c:pep	4	4	4	11.7	419	46.43
SPBC31F10.07	1	SPBC31F10.07:pep	11	11	11	40.5	304	34.195
SPCC162.08c	1	SPCC162.08c:pep	35	35	35	27.1	1837	211.46
SPAC57A7.08	1	SPAC57A7.08:pep	13	12	12	29.1	515	57.131
SPAC23H4.12	1	SPAC23H4.12:pep	12	12	12	43.9	337	39.138
SPBC691.03c	1	SPBC691.03c:pep	22	22	22	35.6	878	100.08
SPBC1198.05	1	SPBC1198.05:pep	15	15	15	52.5	202	22.394
SPAC343.12	1	SPAC343.12:pep	5	5	5	23.1	402	43.827
SPAC1250.01	1	SPAC1250.01:pep	31	31	30	31.9	1199	140.09
SPBC1289.04c	1	SPBC1289.04c:pep	19	19	19	30.5	871	93.772
SPBC1709.19c	1	SPBC1709.19c:pep	10	10	10	59.6	260	28.844
SPCC320.05	1	SPCC320.05:pep	10	10	10	22.8	667	73.467
SPAC17G6.05c	1	SPAC17G6.05c:pep	19	19	19	33	775	86.621
SPBC3B9.18c	1	SPBC3B9.18c:pep	7	7	7	80.8	120	13.618
SPBC1711.03	1	SPBC1711.03:pep	8	8	8	31.8	258	28.883
SPBC13G1.06c	1	SPBC13G1.06c:pep	6	6	6	34.3	102	12.004
SPCC16C4.03	1	SPCC16C4.03:pep	11	11	11	60	175	19.773
SPBC725.04	1	SPBC725.04:pep	12	12	12	29.4	568	61.936
SPBC1734.13	1	SPBC1734.13:pep	10	10	10	28.9	301	33.577
SPCC830.11c	1	SPCC830.11c:pep	6	6	6	48	175	20.222
SPAC664.06	1	SPAC664.06:pep	9	9	9	45.4	249	29.165
SPBC13A2.03	1	SPBC13A2.03:pep	8	8	8	16.4	439	49.936
SPAC23H4.03c	1	SPAC23H4.03c:pep	8	8	8	41.2	216	24.485
SPAC17A5.13	1	SPAC17A5.13:pep	12	12	12	54.9	235	26.492
SPAC630.09c	1	SPAC630.09c:pep	11	11	11	48.4	277	31.809
SPAC20H4.10	1	SPAC20H4.10:pep	19	19	19	22.9	1010	115.28
SPBC20F10.09	1	SPBC20F10.09:pep	3	3	3	58.8	80	8.8533
SPBC19G7.05c	1	SPBC19G7.05c:pep	33	30	29	22.6	1729	199.67
SPCC1450.02	1	SPCC1450.02:pep	18	18	18	32	578	65.192
SPAPB2C8.01	1	SPAPB2C8.01:pep	3	3	3	5.3	1220	124.08
SPAC27D7.02c	1	SPAC27D7.02c:pep	24	24	24	38.7	750	87.264
SPBC776.17	1	SPBC776.17:pep	3	3	3	14.3	238	27.974
SPAC977.12	1	SPAC977.12:pep	12	12	1	43.5	356	38.115
SPBC23G7.08c	1	SPBC23G7.08c:pep	16	16	16	25.8	695	76.678
SPBP8B7.20c	1	SPBP8B7.20c:pep	18	18	18	33.2	608	68.934
SPCC1672.11c	1	SPCC1672.11c:pep	19	19	19	17.3	1315	148.78
SPBC839.02	1	SPBC839.02:pep	9	9	9	29.2	504	57.93
SPCC1620.11	1	SPCC1620.11:pep	20	20	20	24.9	851	97.563
SPAC31A2.05c	1	SPAC31A2.05c:pep	5	5	5	3.5	1587	180.72
SPCC338.06c	1	SPCC338.06c:pep	7	7	7	48.2	139	15.807
SPCC576.07	1	SPCC576.07:pep	7	7	7	31.6	190	21.686
SPBC660.12c	1	SPBC660.12c:pep	9	9	9	27.8	392	44.535
SPAC167.06c	1	SPAC167.06c:pep	6	6	6	54.5	121	13.357
SPCC74.01	1	SPCC74.01:pep	21	21	21	38.7	639	71.664
SPBC3B9.03	1	SPBC3B9.03:pep	13	13	13	29.3	547	61.077
SPAC23D3.06c	1	SPAC23D3.06c:pep	22	22	22	23.6	1325	145.78
SPCC188.02	1	SPCC188.02:pep	13	13	13	26.3	548	63.345
SPAC222.03c	1	SPAC222.03c:pep	5	5	5	49.4	89	10.195
SPCC1494.07	1	SPCC1494.07:pep	19	19	19	14.8	1502	171.17
SPBC3H7.07c;REV__SPBC3H7.07c	2	SPBC3H7.07c:pep;REV__SPBC3H7.07c:pep	12;1	12;1	12;1	57.7	298;298	32.411
SPBC1709.17	1	SPBC1709.17:pep	12	12	12	33.5	505	56.317
SPBC16H5.04	1	SPBC16H5.04:pep	8	8	8	41.8	194	21.964
SPAC15A10.07	1	SPAC15A10.07:pep	8	8	8	59.9	162	18.15
SPAC31A2.02	1	SPAC31A2.02:pep	5	5	5	61.9	126	14.075
SPAC2F7.11	1	SPAC2F7.11:pep	13	13	13	39.3	529	57.76
SPAC1952.09c	1	SPAC1952.09c:pep	17	17	17	43	521	57.915
SPBC691.05c	1	SPBC691.05c:pep	14	14	14	26.3	668	76.67
SPBC1604.04	1	SPBC1604.04:pep	9	9	9	35.7	283	31.025
SPBC839.08c	1	SPBC839.08c:pep	14	14	14	15.7	935	106.4
SPBC409.06	1	SPBC409.06:pep	10	10	10	37.7	300	34.195
SPAC4F10.02	1	SPAC4F10.02:pep	18	18	18	50.5	467	51.74
SPBC713.09	1	SPBC713.09:pep	15	15	15	36.2	395	44.77
SPAP7G5.05	1	SPAP7G5.05:pep	19	1	1	58.4	221	25.359
SPAC17C9.06	1	SPAC17C9.06:pep	15	15	15	41.9	475	51.762
SPBC2G2.03c	1	SPBC2G2.03c:pep	3	3	3	39.2	102	10.444
SPAC22H12.02	1	SPAC22H12.02:pep	7	7	7	43.2	241	27.638
SPCC417.12	1	SPCC417.12:pep	10	10	10	24.7	539	61.253
SPBC16G5.02c	1	SPBC16G5.02c:pep	10	10	10	46.2	318	33.25
SPAC1B3.13	1	SPAC1B3.13:pep	19	19	19	29.7	806	88.937
SPAC1556.08c	1	SPAC1556.08c:pep	9	9	9	37.7	334	37.427
SPAC17A2.01	1	SPAC17A2.01:pep	6	6	6	18.4	526	58.484
SPBC23E6.05	1	SPBC23E6.05:pep	15	15	15	43.2	417	45.672
SPAC8F11.04	1	SPAC8F11.04:pep	11	11	11	31.9	373	41.357
SPBC1347.05c	1	SPBC1347.05c:pep	14	14	14	33.7	398	44.287
SPAC2C4.04c	1	SPAC2C4.04c:pep	6	6	6	51.2	125	14.55
SPCC1450.15	1	SPCC1450.15:pep	8	8	8	26.1	494	55.643
SPBC16A3.18	1	SPBC16A3.18:pep	14	14	14	28.4	490	53.477
SPAC6F6.05	1	SPAC6F6.05:pep	5	5	5	38.5	122	13.333
SPAC22E12.01	1	SPAC22E12.01:pep	3	3	3	15	374	42.3
SPCC550.15c	1	SPCC550.15c:pep	13	13	13	35.6	463	52.25
SPBC1711.07	1	SPBC1711.07:pep	14	14	14	44	480	53.834
SPAC7D4.04	1	SPAC7D4.04:pep	11	11	11	14.3	926	106.77
SPAC20G4.07c	1	SPAC20G4.07c:pep	6	6	6	14.1	453	52.545
SPCC825.02	1	SPCC825.02:pep	18	18	18	49	506	57.074
SPBC839.13c	1	SPBC839.13c:pep	10	2	2	41.6	197	22.17
SPBC1347.06c	1	SPBC1347.06c:pep	14	13	12	43.9	446	50.424
SPBC1703.03c	1	SPBC1703.03c:pep	11	11	11	19.7	664	74.81
SPBC337.07c	1	SPBC337.07c:pep	6	6	6	13.7	497	57.485
SPAC3H1.09c	1	SPAC3H1.09c:pep	14	14	14	28	656	73.06
SPCC1739.10	1	SPCC1739.10:pep	8	8	8	19.9	336	37.074
SPBC1709.08	1	SPBC1709.08:pep	24	24	24	22.6	1441	160.3
SPAPJ696.02	1	SPAPJ696.02:pep	13	13	13	40.2	430	46.373
SPBC16C6.06	1	SPBC16C6.06:pep	23	23	23	21	1466	165.06
SPCC126.10	1	SPCC126.10:pep	8	8	8	44.3	246	27.991
SPAC1B3.05	1	SPAC1B3.05:pep	19	19	19	34.8	640	72.759
SPAC15F9.02	1	SPAC15F9.02:pep	12	12	12	49.6	339	38.564
SPCC1840.06	1	SPCC1840.06:pep	4	4	4	27.8	216	23.988
SPBC30D10.07c	1	SPBC30D10.07c:pep	17	17	17	32.2	631	70.631
SPCC757.05c	1	SPCC757.05c:pep	5	5	5	15	400	44.283
SPCC1672.07	1	SPCC1672.07:pep	26	26	26	42.2	902	100.57
SPBC3D6.06c	1	SPBC3D6.06c:pep	12	12	12	46.3	341	37.338
SPAC806.07	1	SPAC806.07:pep	9	9	9	64.2	151	17.012
SPAC732.01	1	SPAC732.01:pep	2	2	2	13.6	162	16.785
SPAC22F3.07c	1	SPAC22F3.07c:pep	5	5	5	49.2	118	13.64
SPAC2G11.03c	1	SPAC2G11.03c:pep	17	17	17	37.6	558	63.551
SPCC1442.10c	1	SPCC1442.10c:pep	9	9	9	40.4	297	33.716
SPAP27G11.10c	1	SPAP27G11.10c:pep	24	24	24	19.8	1628	184.3
SPBC1289.10c	1	SPBC1289.10c:pep	6	6	6	12.4	743	81.158
SPAP32A8.02	1	SPAP32A8.02:pep	12	12	12	47.3	283	31.832
SPBC354.14c	1	SPBC354.14c:pep	14	14	14	35.3	550	60.232
SPBC12C2.03c	1	SPBC12C2.03c:pep	21	21	21	40.8	571	63.976
SPAC17G6.13	1	SPAC17G6.13:pep	13	13	13	39	433	49.136
SPAC1834.05	1	SPAC1834.05:pep	6	6	6	14.2	577	66.27
SPAC22F3.13	1	SPAC22F3.13:pep	18	18	18	22.8	899	103.43
SPBC21C3.07c	1	SPBC21C3.07c:pep	6	6	6	22.8	307	35.835
SPBC19F8.02	1	SPBC19F8.02:pep	9	9	9	58.4	166	19.443
SPCC63.12c	1	SPCC63.12c:pep	5	5	5	29.4	204	22.661
SPBC887.02	1	SPBC887.02:pep	7	7	7	12.9	696	76.605
SPAC16C9.06c	1	SPAC16C9.06c:pep	23	23	23	32.8	925	104.53
SPBC25H2.07	1	SPBC25H2.07:pep	8	8	8	48.6	138	15.677
SPBP16F5.04	1	SPBP16F5.04:pep	4	4	4	34.9	166	18.72
SPBP4H10.06c	1	SPBP4H10.06c:pep	24	24	24	25.2	1172	134.14
SPAPB1A11.03	1	SPAPB1A11.03:pep	3	3	3	12.8	407	45.31
SPAC25B8.13c	1	SPAC25B8.13c:pep	7	7	7	27.7	397	43.81
SPBC725.08	1	SPBC725.08:pep	19	19	19	41.4	609	70.864
SPAC20G8.05c	1	SPAC20G8.05c:pep	21	21	21	31.4	927	102.12
SPCC18.17c	1	SPCC18.17c:pep	16	16	16	38.3	488	55.357
SPCC70.07c	1	SPCC70.07c:pep	6	6	6	28.1	210	24.249
SPAPB1A10.16	1	SPAPB1A10.16:pep	8	8	8	39.9	143	16.838
SPBC1604.03c	1	SPBC1604.03c:pep	10	10	10	35.8	330	37.372
SPCC285.05	1	SPCC285.05:pep	4	4	4	16.4	348	38.139
SPAC343.11c	1	SPAC343.11c:pep	4	4	4	3.9	1588	180.35
SPBC29A3.15c	1	SPBC29A3.15c:pep	15	15	15	37	476	53.229
SPAC227.14	1	SPAC227.14:pep	10	10	10	62.6	235	26.619
SPCC736.07c	1	SPCC736.07c:pep	5	5	5	9	699	78.258
SPBC887.12	1	SPBC887.12:pep	16	16	16	16.2	1258	142.38
SPAC4D7.04c	1	SPAC4D7.04c:pep	12	12	12	53	264	30.543
SPAC3F10.09	1	SPAC3F10.09:pep	12	12	12	45.1	264	29.345
SPBP35G2.14	1	SPBP35G2.14:pep	19	19	19	26.9	1065	114.23
SPBC8D2.17	1	SPBC8D2.17:pep	10	10	10	42.1	328	36.998
SPBC4F6.09	1	SPBC4F6.09:pep	8	8	8	14.5	612	68.155
SPAC6F12.05c	1	SPAC6F12.05c:pep	13	13	13	26.2	569	64.235
SPCC1183.09c	1	SPCC1183.09c:pep	2	2	2	38.5	109	11.962
SPAC6F6.11c	1	SPAC6F6.11c:pep	12	12	12	57.3	309	33.998
SPAC630.11	1	SPAC630.11:pep	5	5	5	16.4	128	14.096
SPCC162.07	1	SPCC162.07:pep	15	15	15	31.6	702	79.75
SPBC1734.15	1	SPBC1734.15:pep	17	17	17	41.1	542	60.666
SPBC8D2.01	1	SPBC8D2.01:pep	12	12	11	34.6	381	43.381
SPBC16C6.05	1	SPBC16C6.05:pep	9	9	9	38.4	190	21.633
SPAC9E9.15	1	SPAC9E9.15:pep	10	10	10	58.4	219	25.166
SPBC30D10.16	1	SPBC30D10.16:pep	11	11	11	45.6	287	31.592
SPAC227.05	1	SPAC227.05:pep	6	6	6	45.5	123	14.189
SPAC16C9.04c	1	SPAC16C9.04c:pep	14	14	14	29.2	489	54.417
SPBC21B10.02	1	SPBC21B10.02:pep	7	7	7	68.1	141	16.092
SPCC1620.01c	1	SPCC1620.01c:pep	6	6	6	69.8	96	10.989
SPBC887.15c	1	SPBC887.15c:pep	8	8	8	32.8	293	34.19
SPBC685.04c	1	SPBC685.04c:pep	4	4	4	33.6	143	16.938
SPAC9G1.11c	1	SPAC9G1.11c:pep	13	13	13	36.3	380	44.773
SPBC18A7.01	1	SPBC18A7.01:pep	12	12	12	37.3	451	50.594
SPCC1020.07	1	SPCC1020.07:pep	12	12	12	61.4	236	26.496
SPAC1F12.04c	1	SPAC1F12.04c:pep	7	7	7	50.3	191	21.549
SPBC119.08	1	SPBC119.08:pep	12	12	12	32.2	422	48.261
SPAC30D11.03	1	SPAC30D11.03:pep	15	15	15	22.9	754	85.452
SPBC1778.10c	1	SPBC1778.10c:pep	14	14	14	34.8	551	62.715
SPCP1E11.11	1	SPCP1E11.11:pep	16	16	16	29	642	72.634
SPAC8C9.05	1	SPAC8C9.05:pep	7	7	7	54.4	149	16.334
SPBP4H10.08	1	SPBP4H10.08:pep	3	3	3	41.8	79	9.1247
SPCC663.02	1	SPCC663.02:pep	7	7	7	27.5	229	26.108
SPAC1B2.05	1	SPAC1B2.05:pep	20	19	19	40	720	80.099
SPBC359.03c	1	SPBC359.03c:pep	10	10	5	19.7	579	63.259
SPBC1734.14c	1	SPBC1734.14c:pep	5	5	5	41.6	113	13.446
SPBC21H7.03c	1	SPBC21H7.03c:pep	5	5	5	12.1	463	52.758
SPAC2F3.11	1	SPAC2F3.11:pep	16	16	16	38.5	384	43.296
SPCC1281.07c	1	SPCC1281.07c:pep	13	13	13	42.4	337	40.066
SPAC23C4.17	1	SPAC23C4.17:pep	19	19	18	33.1	685	77.821
SPAC167.07c	1	SPAC167.07c:pep	11	11	11	15.9	1029	117.77
SPAC2H10.02c	1	SPAC2H10.02c:pep	7	7	7	33.8	213	23.891
SPCC895.06	1	SPCC895.06:pep	17	17	17	32.2	760	84.948
SPAC3G6.01	1	SPAC3G6.01:pep	30	30	28	27.9	1388	159.38
SPAPB1A10.10c	1	SPAPB1A10.10c:pep	8	7	7	46.6	208	23.474
SPAC10F6.16	1	SPAC10F6.16:pep	4	4	4	35.3	139	15.441
SPBC337.03	1	SPBC337.03:pep	13	13	13	32	387	42.927
SPCC417.10	1	SPCC417.10:pep	7	7	7	14.4	508	56.664
SPAC823.03	1	SPAC823.03:pep	13	13	13	29.4	534	61.49
SPAC637.13c	1	SPAC637.13c:pep	15	15	15	35.9	498	56.087
SPCP1E11.04c	1	SPCP1E11.04c:pep	16	16	16	50.6	425	46.628
SPAC890.04c	1	SPAC890.04c:pep	18	18	18	55.2	440	48.334
SPBC17D11.08	1	SPBC17D11.08:pep	11	11	11	38.6	435	47.742
SPBC18E5.12c	1	SPBC18E5.12c:pep	13	13	13	30.9	502	55.577
SPCC965.14c	1	SPCC965.14c:pep	5	5	5	51.9	162	17.882
SPBC56F2.06	1	SPBC56F2.06:pep	8	8	8	31.9	411	46.218
SPBC29A10.17	1	SPBC29A10.17:pep	6	6	6	39.2	153	17.547
SPBC15C4.01c	1	SPBC15C4.01c:pep	9	9	9	43.3	282	32.822
SPBC29A10.10c	1	SPBC29A10.10c:pep	7	7	7	5.6	1944	222.21
SPAC16E8.06c	1	SPAC16E8.06c:pep	17	17	17	42	438	49.38
SPBC1683.02	1	SPBC1683.02:pep	9	9	9	36.6	339	39.436
SPAC1006.05c	1	SPAC1006.05c:pep	8	8	8	30.8	396	45.929
SPAC6F6.03c	1	SPAC6F6.03c:pep	21	21	21	48.8	537	59.913
SPCC14G10.02	1	SPCC14G10.02:pep	23	23	23	15.9	1568	179.23
SPCC1739.14	1	SPCC1739.14:pep	20	20	20	25.7	933	105.71
SPCC663.04	1	SPCC663.04:pep	4	4	4	41.2	51	6.3084
SPBC25B2.10	1	SPBC25B2.10:pep	8	8	8	32.6	307	34.082
SPAC29A4.08c	1	SPAC29A4.08c:pep	11	11	11	24.4	488	54.191
SPAC2C4.05	1	SPAC2C4.05:pep	3	3	3	23.9	134	15.738
SPBC3E7.15c	1	SPBC3E7.15c:pep	8	8	8	30.2	384	45.335
SPBC1A4.03c	1	SPBC1A4.03c:pep	31	31	31	23.6	1485	167.89
SPBC23E6.09	1	SPBC23E6.09:pep	20	20	20	26.6	1102	121.52
SPBC3D6.08c	1	SPBC3D6.08c:pep	7	7	7	66.4	140	16.171
SPAP8A3.05	1	SPAP8A3.05:pep	2	2	2	3.3	695	77.881
SPAC6F12.17	1	SPAC6F12.17:pep	19	19	19	29.9	733	83.925
SPBC3B8.06	1	SPBC3B8.06:pep	8	8	8	17.6	511	57.703
SPAC14C4.07	1	SPAC14C4.07:pep	9	9	9	22.8	644	71.755
SPAC1687.19c	1	SPAC1687.19c:pep	15	15	15	49	404	45.176
SPBC83.13	1	SPBC83.13:pep	8	8	8	29.7	293	31.575
SPBC12C2.13c	1	SPBC12C2.13c:pep	9	9	9	20.2	531	58.058
SPBC119.15	1	SPBC119.15:pep	8	8	8	25.1	367	41.642
SPAC22E12.18	1	SPAC22E12.18:pep	16	16	16	57.4	336	38.445
SPCC1259.05c	1	SPCC1259.05c:pep	2	2	2	31	58	6.6437
SPAC2E1P3.01	1	SPAC2E1P3.01:pep	10	10	10	35.3	348	37.929
SPBC543.10	1	SPBC543.10:pep	6	6	6	26.3	171	20.191
SPBC713.04c	1	SPBC713.04c:pep	20	20	20	30.3	854	95.44
SPBC25D12.05	1	SPBC25D12.05:pep	11	11	11	25.2	548	60.297
SPAC23G3.10c	1	SPAC23G3.10c:pep	22	22	22	65.6	425	49.759
SPAC3A12.17c	1	SPAC3A12.17c:pep	15	15	15	50.6	395	43.086
SPAC637.03	1	SPAC637.03:pep	4	4	4	19.3	269	30.6
SPBPB7E8.02	1	SPBPB7E8.02:pep	13	13	13	29.1	749	82.21
SPAC11E3.14	1	SPAC11E3.14:pep	15	15	15	30.8	588	67.09
SPBC31F10.12	1	SPBC31F10.12:pep	8	8	8	40.3	181	20.249
SPAC17G8.08c	1	SPAC17G8.08c:pep	6	6	6	28.9	287	31.302
SPAC2E1P5.05	1	SPAC2E1P5.05:pep	12	12	12	26	524	59.134
SPCC663.13c	1	SPCC663.13c:pep	7	7	7	61.1	144	16.323
SPAC1782.01	1	SPAC1782.01:pep	25	25	25	18.9	1679	190.97
SPAC2G11.06	1	SPAC2G11.06:pep	15	15	15	48.8	432	48.401
SPBC649.02	1	SPBC649.02:pep	9	3	3	50.3	143	16.062
SPAC24H6.11c	1	SPAC24H6.11c:pep	8	8	8	11.2	958	107.12
SPBC1215.01	1	SPBC1215.01:pep	6	6	6	29.7	290	33.38
SPCC569.08c	1	SPCC569.08c:pep	10	10	10	46.4	207	22.252
SPAC20H4.01	1	SPAC20H4.01:pep	19	19	19	35.9	666	73.697
SPBC119.09c	1	SPBC119.09c:pep	6	6	6	36	186	21.467
SPCC1450.14c	1	SPCC1450.14c:pep	15	15	15	35.3	567	65.435
SPBC3B9.16c	1	SPBC3B9.16c:pep	17	17	17	18	1136	129.78
SPAC328.01c	1	SPAC328.01c:pep	19	19	19	21.7	1234	140.42
SPAC23D3.09	1	SPAC23D3.09:pep	13	13	13	48.6	424	47.1
SPAC9G1.06c	1	SPAC9G1.06c:pep	13	13	13	23.4	886	98.262
SPCC63.03	1	SPCC63.03:pep	13	13	13	28.3	612	68.787
SPBP22H7.02c	1	SPBP22H7.02c:pep	18	18	18	32.1	833	93.676
SPBC14C8.14c	1	SPBC14C8.14c:pep	19	19	19	24.6	959	109.72
SPCC576.01c	1	SPCC576.01c:pep	8	8	8	29.8	413	46.604
SPCC126.15c	1	SPCC126.15c:pep	6	6	6	27.7	213	23.5
SPAP14E8.03	1	SPAP14E8.03:pep	9	9	9	46	235	26.854
SPAC30D11.11	1	SPAC30D11.11:pep	15	15	15	33.5	442	51.056
SPAC4F8.01	1	SPAC4F8.01:pep	6	6	6	34.3	210	23.928
SPBC557.04	1	SPBC557.04:pep	18	18	18	27.8	872	96.125
SPAC23H3.06	1	SPAC23H3.06:pep	11	11	11	17.6	745	83.87
SPBC146.03c	1	SPBC146.03c:pep	16	16	16	16.4	1324	150.65
SPAC12B10.04	1	SPAC12B10.04:pep	3	3	3	5.7	403	46.523
SPAC110.03	1	SPAC110.03:pep	5	5	5	27.6	192	21.329
SPCC16C4.18c	1	SPCC16C4.18c:pep	12	12	12	30.1	452	50.272
SPBC1861.05	1	SPBC1861.05:pep	15	15	15	29.2	747	80.758
SPBP4H10.07	1	SPBP4H10.07:pep	2	2	2	4.8	583	64.385
SPBC725.07	1	SPBC725.07:pep	5	5	5	8.2	598	67.103
SPAC13G6.09	1	SPAC13G6.09:pep	10	10	10	35	274	31.089
SPAC16C9.01c	1	SPAC16C9.01c:pep	11	11	11	50.4	361	40.05
SPBC1604.11	1	SPBC1604.11:pep	4	4	4	49	96	10.872
SPBC11G11.02c	1	SPBC11G11.02c:pep	14	14	14	42.9	375	42.18
SPAC3H1.02c	1	SPAC3H1.02c:pep	19	19	19	20.6	1036	117.42
SPCC663.03	1	SPCC663.03:pep	23	23	23	22.5	1362	149.63
SPAC22H12.03	1	SPAC22H12.03:pep	10	10	10	41.9	270	30.749
SPAC27D7.14c	1	SPAC27D7.14c:pep	27	27	27	31.7	1039	119.15
SPBC4.04c	1	SPBC4.04c:pep	24	24	23	41.4	830	92.83
SPBC56F2.08c	1	SPBC56F2.08c:pep	15	15	15	30.3	661	72.822
SPAC3C7.05c	1	SPAC3C7.05c:pep	12	12	12	32.1	442	49.78
SPAC24B11.11c	1	SPAC24B11.11c:pep	11	11	11	23.1	607	70.491
SPCC1682.04	1	SPCC1682.04:pep	11	11	11	47.7	176	20.47
SPAC1D4.14	1	SPAC1D4.14:pep	19	19	19	13.6	1628	188.83
SPAC19A8.12	1	SPAC19A8.12:pep	11	11	11	19.7	741	83.233
SPCC285.16c	1	SPCC285.16c:pep	11	11	11	12	1254	141.51
SPBC211.07c	1	SPBC211.07c:pep	5	5	5	28.8	184	20.99
SPCC1620.14c	1	SPCC1620.14c:pep	11	10	10	9.3	1680	189.91
SPBC16E9.01c	1	SPBC16E9.01c:pep	3	3	3	14.9	295	32.726
SPBC16D10.10	1	SPBC16D10.10:pep	10	10	10	28.8	386	43.291
SPBC27.04	1	SPBC27.04:pep	5	5	5	6.4	1052	118.26
SPAC2G11.09	1	SPAC2G11.09:pep	12	12	12	20.6	793	90.572
SPAC24B11.09	1	SPAC24B11.09:pep	4	4	4	33.9	118	13.536
SPBC776.08c	1	SPBC776.08c:pep	16	16	16	19.1	1097	126.08
SPAC20G8.03	1	SPAC20G8.03:pep	9	9	9	18.3	557	61.136
SPCC162.11c	1	SPCC162.11c:pep	14	14	14	38.8	454	51.389
SPBC31F10.15c	1	SPBC31F10.15c:pep	3	3	3	43.3	67	7.7406
SPAC6B12.09	1	SPAC6B12.09:pep	16	16	16	52	304	35.47
SPBP16F5.07	1	SPBP16F5.07:pep	13	13	13	31	426	48.955
SPAC23H3.10	1	SPAC23H3.10:pep	12	12	12	25.8	503	57.684
SPAC1556.01c	1	SPAC1556.01c:pep	27	27	27	22.6	1285	149.03
SPAC2E1P5.04c	1	SPAC2E1P5.04c:pep	3	3	3	12.4	355	40.023
SPBC30D10.10c	1	SPBC30D10.10c:pep	7	6	6	3.2	2335	266.18
SPAC328.09	1	SPAC328.09:pep	10	10	10	34.2	298	33.099
SPBC1711.10c	1	SPBC1711.10c:pep	10	10	10	24.7	572	63.618
SPAC823.08c	1	SPAC823.08c:pep	13	13	13	34.4	465	51.863
SPAC57A7.06	1	SPAC57A7.06:pep	13	13	13	15.6	929	105.06
SPAC16A10.03c	1	SPAC16A10.03c:pep	3	3	3	4.4	847	97.485
SPBC83.02c	1	SPBC83.02c:pep	5	2	2	52.1	94	10.38
SPBC577.12	1	SPBC577.12:pep	14	14	14	38	606	67.624
SPAC144.04c	1	SPAC144.04c:pep	14	14	14	35.6	432	47.843
SPAC4F10.09c	1	SPAC4F10.09c:pep	22	22	22	26.6	860	97.992
SPBC83.15	1	SPBC83.15:pep	13	13	13	35.4	387	43.767
SPAC8F11.09c	1	SPAC8F11.09c:pep	7	7	7	34.5	255	28.489
SPCC757.08	1	SPCC757.08:pep	11	11	11	42.6	291	32.378
SPBC16H5.03c	1	SPBC16H5.03c:pep	13	13	13	25.2	628	70.613
SPAC25H1.08c	1	SPAC25H1.08c:pep	7	7	7	27.3	399	43.431
SPBC19F5.02c	1	SPBC19F5.02c:pep	14	14	14	25.6	710	79.121
SPBC6B1.06c	1	SPBC6B1.06c:pep	18	18	18	30.5	775	86.782
SPAC222.13c	1	SPAC222.13c:pep	12	12	12	24.5	592	68.639
SPAC105.02c	1	SPAC105.02c:pep	4	4	4	37.6	170	18.557
SPBC119.12	1	SPBC119.12:pep	12	12	12	34.7	401	46.153
SPBC17G9.04c	1	SPBC17G9.04c:pep	12	12	12	25.9	675	78.021
SPAC1296.01c	1	SPAC1296.01c:pep	14	14	14	31.2	542	58.915
SPAC1D4.02c	1	SPAC1D4.02c:pep	8	8	8	36.5	345	37.834
SPBC11G11.03	1	SPBC11G11.03:pep	9	9	9	51.9	241	26.663
SPAC144.18	1	SPAC144.18:pep	2	2	2	6.7	345	38.018
SPCC1442.08c	1	SPCC1442.08c:pep	7	7	7	76.7	86	10.264
SPBC725.02	1	SPBC725.02:pep	7	7	7	37.6	295	32.55
SPAC13C5.05c	1	SPAC13C5.05c:pep	11	11	11	25.5	518	56.347
SPAC328.05	1	SPAC328.05:pep	2	2	2	4.7	464	51.593
SPAC644.11c	1	SPAC644.11c:pep	13	13	13	39.8	425	48.187
SPAC11D3.04c	1	SPAC11D3.04c:pep	6	6	6	51.5	130	14.645
SPBC1734.03	1	SPBC1734.03:pep	20	20	20	35.3	733	81.925
SPBC9B6.05c	1	SPBC9B6.05c:pep	5	5	5	80.6	93	10.665
SPBC16A3.01	1	SPBC16A3.01:pep	13	13	13	39.8	412	46.66
SPCC1235.11	1	SPCC1235.11:pep	5	5	5	39.7	141	16.055
SPAC17H9.05	1	SPAC17H9.05:pep	9	9	9	28.2	333	37.818
SPAPB2B4.04c	1	SPAPB2B4.04c:pep	20	20	20	22.1	1292	142.23
SPBC19C2.15c	1	SPBC19C2.15c:pep	3	3	3	16.3	208	24.036
SPCC4G3.02	1	SPCC4G3.02:pep	11	11	11	69.2	182	20.685
SPAC19A8.03	1	SPAC19A8.03:pep	11	11	11	27.7	559	64.152
SPBC119.11c	1	SPBC119.11c:pep	5	5	5	17.6	363	41.538
SPBC21C3.20c	1	SPBC21C3.20c:pep	4	4	4	6.7	1098	128.3
SPBC713.07c	1	SPBC713.07c:pep	10	10	10	26.2	577	66.025
SPBC1734.01c	1	SPBC1734.01c:pep	17	17	17	34.3	682	77.753
SPBC215.02	1	SPBC215.02:pep	7	7	7	50	154	16.774
SPAC589.04	1	SPAC589.04:pep	10	10	10	47.6	271	30.897
SPCC320.14	1	SPCC320.14:pep	13	13	13	57	323	35.048
SPAC18B11.10	1	SPAC18B11.10:pep	16	16	16	35.8	614	67.33
SPAC821.03c	1	SPAC821.03c:pep	10	10	10	32.2	485	53.991
SPAC3A11.13	1	SPAC3A11.13:pep	6	6	6	60.5	114	12.813
SPBC3B9.07c	1	SPBC3B9.07c:pep	8	8	8	48.6	173	19.385
SPAC806.06c	1	SPAC806.06c:pep	9	9	9	26.4	368	42.149
SPBC4B4.01c	1	SPBC4B4.01c:pep	10	10	10	39.7	403	44.861
SPCC970.06	1	SPCC970.06:pep	5	5	5	24.8	302	34.385
SPAC26A3.14c	1	SPAC26A3.14c:pep	2	2	2	15.1	73	8.2493
SPAC1687.03c	1	SPAC1687.03c:pep	11	11	11	38.6	342	37.654
SPCC4B3.10c	1	SPCC4B3.10c:pep	15	15	15	26.9	640	72.765
SPBC17G9.02c	1	SPBC17G9.02c:pep	13	13	13	51.8	371	42.629
SPAC23H3.13c	1	SPAC23H3.13c:pep	7	7	7	28	354	40.522
SPBC36B7.07	1	SPBC36B7.07:pep	8	8	8	56.9	225	24.97
SPBC215.07c	1	SPBC215.07c:pep	17	17	17	35.6	568	62.824
SPAC12G12.03	1	SPAC12G12.03:pep	11	11	11	25.3	576	62.068
SPAC1D4.08	1	SPAC1D4.08:pep	3	3	3	14.8	237	26.924
SPCC553.08c	1	SPCC553.08c:pep	14	14	14	15.9	1000	112.13
SPBC649.05	1	SPBC649.05:pep	5	5	5	8.6	548	61.957
SPBC19G7.16	1	SPBC19G7.16:pep	16	16	16	45.3	428	49.114
SPAC630.13c	1	SPAC630.13c:pep	14	14	14	12.6	1339	154.81
SPAC1527.03	1	SPAC1527.03:pep	17	17	17	47.6	475	53.232
SPAC3H8.08c	1	SPAC3H8.08c:pep	6	6	6	14.9	563	64.69
SPCC663.08c;SPCC24B10.20	2	SPCC663.08c:pep;SPCC24B10.20:pep	8;2	5;1	5;1	42.3	253;254	27.696
SPBC19C7.12c	1	SPBC19C7.12c:pep	11	11	11	21.3	390	46.514
SPAC6F6.12	1	SPAC6F6.12:pep	11	11	11	30.9	401	46.376
SPAC26A3.08	1	SPAC26A3.08:pep	8	8	8	55.1	147	15.476
SPAC227.06	1	SPAC227.06:pep	5	5	5	22.1	249	27.931
SPBC19C2.14	1	SPBC19C2.14:pep	4	4	4	54.6	97	11.033
SPCC576.02	1	SPCC576.02:pep	6	6	6	36	236	24.953
SPBC31E1.06	1	SPBC31E1.06:pep	20	20	20	25.4	1121	127.64
SPAC26F1.12c	1	SPAC26F1.12c:pep	10	10	10	40.2	356	41.26
SPAC1D4.09c	1	SPAC1D4.09c:pep	3	3	3	12.9	240	27.057
SPAC4G8.09	1	SPAC4G8.09:pep	8	8	8	8.6	874	100.89
SPCC188.08c	1	SPCC188.08c:pep	23	23	23	27.9	1108	128.67
SPCC569.07	1	SPCC569.07:pep	9	9	9	27	470	53.613
SPAC23C11.06c	1	SPAC23C11.06c:pep	10	10	10	23.2	535	60.123
SPCC18.06c	1	SPCC18.06c:pep	7	7	7	26.6	335	37.533
SPCC13B11.03c	1	SPCC13B11.03c:pep	2	2	2	10.5	256	28.628
SPBC2G5.01	1	SPBC2G5.01:pep	9	9	9	32.6	374	43.097
SPBC428.04	1	SPBC428.04:pep	4	4	4	40	115	12.762
SPAC144.17c	1	SPAC144.17c:pep	14	14	14	41.6	449	52.01
SPAC12B10.01c	1	SPAC12B10.01c:pep	16	16	16	13.1	1647	185.61
SPAC1006.09	1	SPAC1006.09:pep	18	18	18	16.2	1436	163.27
SPAC23H4.14	1	SPAC23H4.14:pep	10	10	10	12.7	905	103.69
SPBC14F5.11c	1	SPBC14F5.11c:pep	16	16	16	36.3	586	67.001
SPCC16A11.03c	1	SPCC16A11.03c:pep	13	13	13	29.6	466	53.677
SPAC13G6.11c	1	SPAC13G6.11c:pep	12	12	12	33.2	404	43.406
SPBC1105.09	1	SPBC1105.09:pep	3	3	3	12	167	19.106
SPAC1D4.10	1	SPAC1D4.10:pep	6	6	6	7	809	90.602
SPCC16C4.11	1	SPCC16C4.11:pep	8	8	8	39.9	288	32.736
SPBC16G5.07c	1	SPBC16G5.07c:pep	7	7	7	23.2	354	39.274
SPAC2F3.02	1	SPAC2F3.02:pep	7	7	7	38	192	21.657
SPAC4G9.17c	1	SPAC4G9.17c:pep	11	11	11	31.5	387	43.957
SPAC23H4.15	1	SPAC23H4.15:pep	15	15	15	27.8	783	90.125
SPAC23G3.03	1	SPAC23G3.03:pep	9	9	9	25.8	431	48.582
SPBC11C11.08	1	SPBC11C11.08:pep	8	8	8	37.5	275	31.068
SPCC16A11.17	1	SPCC16A11.17:pep	14	14	14	20.1	911	101.54
SPAC2F3.05c	1	SPAC2F3.05c:pep	12	12	12	57.8	275	31.172
SPAC869.10c	1	SPAC869.10c:pep	7	7	7	14.3	552	61.119
SPAC3F10.17	1	SPAC3F10.17:pep	11	11	11	37.8	386	44.479
SPCC16C4.08c	1	SPCC16C4.08c:pep	6	6	6	22.6	341	37.709
SPCC126.12	1	SPCC126.12:pep	10	10	10	55.4	278	29.85
SPCC188.07	1	SPCC188.07:pep	10	10	10	17.6	735	83.3
SPBC17D11.03c	1	SPBC17D11.03c:pep	6	6	6	34.3	213	23.489
SPAPJ698.03c	1	SPAPJ698.03c:pep	18	18	18	21	1206	134.97
SPAPB17E12.14c	1	SPAPB17E12.14c:pep	17	17	17	30.8	668	76.392
SPBC1711.17	1	SPBC1711.17:pep	4	3	3	3.8	1173	132.97
SPAC607.06c	1	SPAC607.06c:pep	15	15	15	32.4	612	68.57
SPCC16C4.07	1	SPCC16C4.07:pep	14	14	14	32.4	561	60.393
SPBC1685.05	1	SPBC1685.05:pep	11	11	11	17.1	997	111.29
SPBC1604.14c	1	SPBC1604.14c:pep	15	15	15	33.3	658	72.357
SPBC691.04	1	SPBC691.04:pep	20	20	20	49.2	535	59.449
SPAPYUG7.03c	1	SPAPYUG7.03c:pep	2	2	2	3.8	706	78.96
SPBC725.10	1	SPBC725.10:pep	3	3	3	21.3	164	18.388
SPCC777.05	1	SPCC777.05:pep	6	6	6	22.3	314	35.591
SPBC29A3.06	1	SPBC29A3.06:pep	13	13	13	31.2	555	62.472
SPAP27G11.09c	1	SPAP27G11.09c:pep	16	16	16	66	326	36.524
SPBP8B7.09c	1	SPBP8B7.09c:pep	14	14	14	17.8	978	110.11
SPAC1786.02	1	SPAC1786.02:pep	12	12	12	22.4	644	70.57
SPAC2F3.13c	1	SPAC2F3.13c:pep	12	12	12	51.7	348	38.45
SPAC23G3.02c	1	SPAC23G3.02c:pep	33	33	33	8.9	4924	559.84
SPAC18B11.07c	1	SPAC18B11.07c:pep	2	2	2	16.6	151	17.097
SPBC365.13c	1	SPBC365.13c:pep	15	15	15	38.1	399	43.2
SPAC23C11.15	1	SPAC23C11.15:pep	19	19	19	22.5	1075	124.85
SPBC16A3.12c	1	SPBC16A3.12c:pep	12	12	12	33.2	443	51.547
SPCC14G10.01	1	SPCC14G10.01:pep	8	8	8	36.9	236	26.828
SPCC4B3.09c	1	SPCC4B3.09c:pep	6	6	6	47.4	173	18.966
SPAC15E1.02c	1	SPAC15E1.02c:pep	3	3	3	25	148	15.94
SPAPB1E7.05	1	SPAPB1E7.05:pep	18	18	18	22	1076	118.13
SPAC16.03c	1	SPAC16.03c:pep	13	13	13	41.2	337	37.552
SPCC16C4.01	1	SPCC16C4.01:pep	10	10	10	32.5	382	44.641
SPBC2G2.06c	1	SPBC2G2.06c:pep	8	8	8	16	677	76.534
SPAC15A10.11	1	SPAC15A10.11:pep	28	28	28	15.9	2052	234.04
SPAC17A5.09c	1	SPAC17A5.09c:pep	14	14	14	49.4	310	34.978
SPAC343.01c	1	SPAC343.01c:pep	9	9	9	25.4	426	47.322
SPBC16G5.10	1	SPBC16G5.10:pep	8	8	8	38.8	299	32.013
SPBC11G11.05	1	SPBC11G11.05:pep	10	10	10	48.2	251	28.01
SPBC29A3.11c	1	SPBC29A3.11c:pep	6	6	6	23.6	297	33.191
SPBC211.04c	1	SPBC211.04c:pep	18	18	18	28.5	892	99.549
SPBC28F2.08c	1	SPBC28F2.08c:pep	15	15	15	28.5	713	80.259
SPBC211.03c	1	SPBC211.03c:pep	19	19	19	17	1462	165.43
SPBC25B2.01	1	SPBC25B2.01:pep	12	12	12	27.2	592	66.016
SPBC1289.11	1	SPBC1289.11:pep	13	13	13	57.1	340	37.427
SPBC1289.09	1	SPBC1289.09:pep	8	8	8	30.9	223	25.568
SPBC25D12.03c	1	SPBC25D12.03c:pep	19	19	19	30.8	760	85.621
SPAC11D3.01c	1	SPAC11D3.01c:pep	5	5	5	78.5	79	8.7724
SPCC736.04c	1	SPCC736.04c:pep	8	8	8	25.9	375	42.621
SPCC736.12c	1	SPCC736.12c:pep	11	11	11	25.2	488	54.538
SPBC646.02	1	SPBC646.02:pep	20	20	20	18.5	1284	148.37
SPAC806.02c	1	SPAC806.02c:pep	12	12	12	29.3	608	67.68
SPAC1A6.03c	1	SPAC1A6.03c:pep	8	8	8	18	662	73.041
SPAC22G7.02	1	SPAC22G7.02:pep	9	9	9	10.2	990	111.47
SPBC13G1.03c	1	SPBC13G1.03c:pep	11	11	11	44.4	286	32.813
SPBC11C11.10	1	SPBC11C11.10:pep	9	9	9	31.2	407	45.166
SPAC17G8.02	1	SPAC17G8.02:pep	4	4	4	18.8	330	36.063
SPAC8E11.07c	1	SPAC8E11.07c:pep	6	6	6	68.1	119	13.531
SPAC24B11.13	1	SPAC24B11.13:pep	12	12	12	41.1	336	36.826
SPBC25B2.06c	1	SPBC25B2.06c:pep	6	6	6	26.4	284	31.775
SPBC15C4.04c	1	SPBC15C4.04c:pep	6	6	6	14.2	542	59.726
SPAC57A10.11c	1	SPAC57A10.11c:pep	11	11	11	40.3	313	34.914
SPBP22H7.06	1	SPBP22H7.06:pep	5	5	5	21.7	230	26.264
SPAC1F7.10	1	SPAC1F7.10:pep	8	8	8	47.1	238	25.429
SPCC61.03	1	SPCC61.03:pep	10	10	10	33.6	327	36.093
SPCC1919.05	1	SPCC1919.05:pep	12	12	12	11.5	1389	157.87
SPBC887.01	1	SPBC887.01:pep	8	8	8	50.6	178	20.936
SPAC17G6.12	1	SPAC17G6.12:pep	15	15	15	22.6	767	89.425
SPAC16.04	1	SPAC16.04:pep	14	14	14	30.5	617	69.698
SPBC19G7.01c	1	SPBC19G7.01c:pep	16	16	16	20.7	982	109.74
SPCC1840.09	1	SPCC1840.09:pep	6	6	6	27.5	276	29.919
SPAC29A4.16	1	SPAC29A4.16:pep	13	13	13	27.5	636	69.114
SPBC36B7.03	1	SPBC36B7.03:pep	11	11	11	25.7	611	69.725
SPAC1002.13c	1	SPAC1002.13c:pep	2	2	2	5.8	417	41.75
SPAC3C7.12	1	SPAC3C7.12:pep	12	12	12	27.3	461	52.607
SPBC2F12.10	1	SPBC2F12.10:pep	7	7	7	25	308	35.641
SPAP27G11.02	1	SPAP27G11.02:pep	9	9	9	28.9	356	40.508
SPBC3E7.11c	1	SPBC3E7.11c:pep	10	10	10	35.5	355	40.53
SPCC1840.07c	1	SPCC1840.07c:pep	5	5	5	21.4	332	37.435
SPBC409.07c	1	SPBC409.07c:pep	10	10	10	21.5	605	64.762
SPAC19D5.07	1	SPAC19D5.07:pep	6	6	6	17.5	474	52.945
SPCC16A11.16c	1	SPCC16A11.16c:pep	6	6	6	19.8	388	43.902
SPAC57A7.07c	1	SPAC57A7.07c:pep	10	10	10	41.9	308	34.541
SPBC1347.04	1	SPBC1347.04:pep	11	11	11	36.9	347	39.803
SPAC1786.03	1	SPAC1786.03:pep	11	11	11	25.6	601	69.354
SPAC7D4.11c	1	SPAC7D4.11c:pep	12	12	12	20.3	769	87.51
SPBC83.05	1	SPBC83.05:pep	15	15	15	26.9	773	88.2
SPAC644.18c	1	SPAC644.18c:pep	4	4	4	26.2	183	20.837
SPCC18.11c	1	SPCC18.11c:pep	4	4	4	78	109	11.856
SPCC1442.05c	1	SPCC1442.05c:pep	9	9	9	61	177	20.036
SPCC645.10	1	SPCC645.10:pep	9	9	9	22.3	484	54.722
SPBC28F2.02	1	SPBC28F2.02:pep	12	12	12	37.3	292	33.281
SPBC365.10	1	SPBC365.10:pep	19	19	19	33.6	721	82.363
SPBC887.10	1	SPBC887.10:pep	12	12	12	24.1	522	57.239
SPCC24B10.17	1	SPCC24B10.17:pep	5	5	5	21.1	199	23.138
SPAC12G12.05c	1	SPAC12G12.05c:pep	7	7	7	62	163	18.448
SPBC1347.09	1	SPBC1347.09:pep	9	9	9	38	284	31.71
SPMIT.09	1	SPMIT.09:pep	1	1	1	16.7	48	5.6357
SPBC25H2.09	1	SPBC25H2.09:pep	6	6	6	35.8	162	18.767
SPCC594.01	1	SPCC594.01:pep	12	12	12	19.5	791	88.748
SPBC29A3.16	1	SPBC29A3.16:pep	5	5	5	37.3	166	19.044
SPAC1071.06	1	SPAC1071.06:pep	16	16	16	44	523	59.138
SPCC790.02	1	SPCC790.02:pep	11	11	11	15	900	103.72
SPAPB1A10.13	1	SPAPB1A10.13:pep	13	13	13	37.1	529	56.249
SPAC5D6.04	1	SPAC5D6.04:pep	4	4	4	13.7	452	49.575
SPCC364.01	1	SPCC364.01:pep	4	4	4	19.1	320	36.017
SPBC839.06	1	SPBC839.06:pep	11	11	11	15.9	1037	115.33
SPBC800.14c	1	SPBC800.14c:pep	3	3	3	14.4	160	17.701
SPBC1711.16	1	SPBC1711.16:pep	10	10	10	23.6	516	57.336
SPAC688.07c	1	SPAC688.07c:pep	13	13	13	14.5	1038	113.94
SPAC1B3.12c	1	SPAC1B3.12c:pep	3	3	3	63.4	71	8.2757
SPCC777.12c	1	SPCC777.12c:pep	4	4	4	18.1	238	26.889
SPBC15C4.05	1	SPBC15C4.05:pep	17	17	17	16	1428	161.46
SPCC4G3.17	1	SPCC4G3.17:pep	10	10	10	69.7	198	22.929
SPCC1827.05c	1	SPCC1827.05c:pep	9	9	9	34.8	276	31.404
SPBC3B9.10	1	SPBC3B9.10:pep	8	8	8	44.4	214	24.743
SPBC12D12.07c	1	SPBC12D12.07c:pep	6	6	6	42.1	133	15.079
SPBC16A3.10	1	SPBC16A3.10:pep	7	7	7	13.4	509	58.821
SPBC1683.06c	1	SPBC1683.06c:pep	8	8	8	41	310	33.667
SPBC776.13	1	SPBC776.13:pep	14	14	14	12.1	1158	131.32
SPAC637.06	1	SPAC637.06:pep	10	10	10	36.3	347	41.127
SPCC970.10c	1	SPCC970.10c:pep	16	16	16	26.9	680	78.052
SPAC1B3.20	1	SPAC1B3.20:pep	5	5	5	62.8	78	8.5512
SPAC1805.04	1	SPAC1805.04:pep	14	14	14	15.3	1162	132.07
SPAC3C7.13c	1	SPAC3C7.13c:pep	10	10	10	21.6	473	54.429
SPAC17H9.04c	1	SPAC17H9.04c:pep	10	10	10	23	604	66.396
SPAC13G6.07c	1	SPAC13G6.07c:pep	19	1	1	58.6	239	27.499
SPAC664.03	1	SPAC664.03:pep	9	9	9	26.1	456	51.189
SPAC19D5.05c	1	SPAC19D5.05c:pep	7	7	7	42.1	183	21.777
SPBC26H8.08c	1	SPBC26H8.08c:pep	14	14	14	34.7	470	52.434
SPAC22E12.05c	1	SPAC22E12.05c:pep	5	5	5	20.7	184	22.386
SPAC3G6.09c	1	SPAC3G6.09c:pep	11	11	11	17	849	96.34
SPAC29E6.05c	1	SPAC29E6.05c:pep	7	7	7	42.9	170	19.437
SPAPB24D3.01	1	SPAPB24D3.01:pep	5	5	5	11.3	594	68.965
SPBC16D10.03	1	SPBC16D10.03:pep	11	11	11	40.5	346	37.515
SPAC13A11.04c	1	SPAC13A11.04c:pep	1	1	1	2.4	449	51.72
SPBP8B7.17c	1	SPBP8B7.17c:pep	16	16	16	33.8	506	55.753
SPCC1235.05c	1	SPCC1235.05c:pep	19	19	19	20.5	1284	143.67
SPCC1739.08c	1	SPCC1739.08c:pep	10	10	10	46.7	261	28.376
SPCC757.13	1	SPCC757.13:pep	5	5	5	11.3	522	58.696
SPCC1739.01	1	SPCC1739.01:pep	10	10	10	22.9	547	57.978
SPBPB2B2.01	1	SPBPB2B2.01:pep	7	7	7	14.5	585	65.128
SPAC630.05	1	SPAC630.05:pep	7	7	7	14.1	743	86.792
SPAC1851.03	1	SPAC1851.03:pep	4	4	4	23.8	231	26.677
SPBC1683.03c	1	SPBC1683.03c:pep	4	4	4	9.1	519	56.954
SPAC3F10.16c	1	SPAC3F10.16c:pep	14	14	14	31.3	616	69.674
SPCC777.04	1	SPCC777.04:pep	7	7	7	15.5	521	57.234
SPCC126.03	1	SPCC126.03:pep	13	13	13	34.1	534	60.323
SPAC4F8.13c	1	SPAC4F8.13c:pep	16	16	16	12.3	1489	171.67
SPAC17G8.01c	1	SPAC17G8.01c:pep	18	18	18	29.3	803	92.229
SPCC24B10.05	1	SPCC24B10.05:pep	3	3	3	52.4	84	9.805
SPAC1565.06c	1	SPAC1565.06c:pep	5	5	5	29.3	198	22.543
SPBC3B8.08	1	SPBC3B8.08:pep	7	7	7	52.3	153	17.186
SPBPB21E7.09;SPAC186.03	2	SPBPB21E7.09:pep;SPAC186.03:pep	6;5	5;4	5;4	21.4	360;360	38.597
SPAPB18E9.01	1	SPAPB18E9.01:pep	9	9	9	20.4	450	51.747
SPAC15A10.13	1	SPAC15A10.13:pep	14	14	14	26.2	637	71.632
SPAC9.02c	1	SPAC9.02c:pep	10	10	10	66.1	165	18.791
SPAC13G6.14	1	SPAC13G6.14:pep	10	10	10	45.7	210	23.724
SPAC22H10.05c	1	SPAC22H10.05c:pep	13	13	13	45.6	456	50.449
SPBC6B1.10	1	SPBC6B1.10:pep	16	16	16	34.2	558	63.132
SPBC17A3.01c	1	SPBC17A3.01c:pep	10	10	10	24.8	452	52.571
SPAC24C9.10c	1	SPAC24C9.10c:pep	6	6	6	31.2	263	29.311
SPAC23H4.07c	1	SPAC23H4.07c:pep	8	8	8	35.7	227	25.611
SPCP25A2.03	1	SPCP25A2.03:pep	13	13	13	21.4	752	85.239
SPBC106.10	1	SPBC106.10:pep	7	7	7	16.6	512	57.577
SPAC3A12.15	1	SPAC3A12.15:pep	13	13	13	27.5	756	87.505
SPBC337.14	1	SPBC337.14:pep	9	9	9	77	135	15.361
SPAC637.10c	1	SPAC637.10c:pep	5	5	5	30.9	243	27.14
SPBC29B5.04c	1	SPBC29B5.04c:pep	13	13	13	29.1	605	68.508
SPBC1778.07	1	SPBC1778.07:pep	7	7	7	20.4	373	43.334
SPCC4G3.18	1	SPCC4G3.18:pep	14	14	14	22.1	828	91.995
SPCC74.06	1	SPCC74.06:pep	9	9	9	4	2344	266.85
SPAC869.05c	1	SPAC869.05c:pep	12	12	11	19.8	840	93.517
SPBC3B8.09	1	SPBC3B8.09:pep	11	11	11	28.3	597	68.02
SPAC24C9.16c	1	SPAC24C9.16c:pep	1	1	1	16.7	66	7.5018
SPAC664.02c	1	SPAC664.02c:pep	11	11	11	20.5	662	75.192
SPAC8E11.04c	1	SPAC8E11.04c:pep	10	10	10	54	224	24.474
SPAC30.02c	1	SPAC30.02c:pep	10	10	10	56.2	281	32.495
SPAC1486.09	1	SPAC1486.09:pep	10	10	10	37.1	388	43.874
SPAC22G7.05	1	SPAC22G7.05:pep	14	14	14	35.8	598	69.523
SPCC1235.10c	1	SPCC1235.10c:pep	13	13	13	21.1	752	85.853
SPAC9G1.02	1	SPAC9G1.02:pep	14	14	14	15.6	1401	160.54
SPBC3B9.13c	1	SPBC3B9.13c:pep	8	2	2	99.1	110	11.171
SPBC428.01c	1	SPBC428.01c:pep	14	14	14	22.5	813	93.262
SPAC4G9.08c	1	SPAC4G9.08c:pep	19	19	19	19.4	1165	130.24
SPBC23E6.10c	1	SPBC23E6.10c:pep	11	11	11	44.8	359	39.379
SPBC2A9.08c	1	SPBC2A9.08c:pep	4	4	4	17.7	215	24.902
SPAC1F7.09c	1	SPAC1F7.09c:pep	12	12	12	39.5	342	37.965
SPAC24C9.14	1	SPAC24C9.14:pep	7	7	7	30.7	329	35.668
SPBC1718.06	1	SPBC1718.06:pep	10	10	10	14.2	903	101.9
SPAC24B11.10c	1	SPAC24B11.10c:pep	14	14	14	22.6	932	103.18
SPAC1783.02c	1	SPAC1783.02c:pep	7	7	7	27.3	300	33.247
SPCC1840.01c	1	SPCC1840.01c:pep	5	5	5	27.9	190	20.884
SPAC10F6.14c	1	SPAC10F6.14c:pep	11	11	11	25.2	535	61.952
SPBC1198.13c	1	SPBC1198.13c:pep	7	7	7	31.3	307	34.622
SPAC23D3.13c	1	SPAC23D3.13c:pep	15	15	15	11.1	1616	181.45
SPCC794.01c	1	SPCC794.01c:pep	16	16	16	43.2	475	53.509
SPAC17D4.04	1	SPAC17D4.04:pep	13	12	12	21.8	688	78.514
SPBC1709.06	1	SPBC1709.06:pep	10	10	10	29	479	53.146
SPBC3B9.08c	1	SPBC3B9.08c:pep	6	6	6	55.1	147	17.267
SPBC530.05	1	SPBC530.05:pep	13	13	13	23	762	85.198
SPAP8A3.03	1	SPAP8A3.03:pep	10	10	10	22.7	453	50.277
SPBC646.12c	1	SPBC646.12c:pep	12	12	12	23	766	87.539
SPBC1539.10	1	SPBC1539.10:pep	7	7	7	31.1	209	23.946
SPAC23C11.03	1	SPAC23C11.03:pep	7	7	7	15.2	598	67.706
SPAC222.11	1	SPAC222.11:pep	18	18	18	65.4	312	36.244
SPCC364.04c	1	SPCC364.04c:pep	8	8	8	14.1	633	72.182
SPCC306.05c	1	SPCC306.05c:pep	4	4	4	19.9	281	31.881
SPAC31A2.14	1	SPAC31A2.14:pep	13	13	13	17.2	962	107.28
SPBC2G2.13c	1	SPBC2G2.13c:pep	8	8	8	36.6	322	35.974
SPBC839.10	1	SPBC839.10:pep	15	15	15	30.6	695	81.043
SPAC688.13	1	SPAC688.13:pep	2	2	2	9.6	335	38.458
SPBC31F10.02	1	SPBC31F10.02:pep	3	3	3	33.5	161	17.181
SPBC30D10.06	1	SPBC30D10.06:pep	5	5	5	43	121	13.941
SPAC869.04	1	SPAC869.04:pep	13	13	13	47.1	410	44.792
SPAC27F1.09c	1	SPAC27F1.09c:pep	13	13	13	15.4	1166	132.67
SPCP1E11.10	1	SPCP1E11.10:pep	9	9	9	72	207	22.863
SPCC548.06c	1	SPCC548.06c:pep	1	1	1	2.9	547	60.176
SPAC4D7.13	1	SPAC4D7.13:pep	12	12	12	25.5	695	81.929
SPBC409.18	1	SPBC409.18:pep	5	5	5	21.9	279	31.192
SPAC5H10.05c	1	SPAC5H10.05c:pep	7	7	7	45.4	196	22.104
SPAC1071.05	1	SPAC1071.05:pep	9	9	9	36	339	38.247
SPAC1F3.01	1	SPAC1F3.01:pep	15	15	15	23.4	777	89.559
SPCC188.11	1	SPCC188.11:pep	5	5	5	9.7	557	62.696
SPAC1565.07c	1	SPAC1565.07c:pep	13	13	13	12	1220	137.88
SPBC36.12c	1	SPBC36.12c:pep	6	6	6	18.7	379	42.961
SPAPB8E5.04c	1	SPAPB8E5.04c:pep	6	6	6	42	188	20.531
SPAC29E6.03c	1	SPAC29E6.03c:pep	14	14	14	14	1091	124.33
SPAC24H6.03	1	SPAC24H6.03:pep	6	6	6	8.2	785	90.511
SPAPB1A10.06c	1	SPAPB1A10.06c:pep	13	13	13	14.8	1183	133.99
SPAC8F11.08c	1	SPAC8F11.08c:pep	10	10	10	32.4	376	41.754
SPAC2F7.14c	1	SPAC2F7.14c:pep	4	4	4	17	329	36.687
SPCC550.03c	1	SPCC550.03c:pep	14	14	14	12.9	1213	138.03
SPBP23A10.05	1	SPBP23A10.05:pep	10	10	10	35.2	395	44.254
SPBC36.05c	1	SPBC36.05c:pep	8	8	8	25.7	405	46.111
SPBC14F5.08	1	SPBC14F5.08:pep	9	9	9	26.1	376	43.509
SPBC30D10.08	1	SPBC30D10.08:pep	9	9	9	43.7	270	31.178
SPAC3A12.13c	1	SPAC3A12.13c:pep	15	15	15	51.1	274	30.532
SPBC16G5.09	1	SPBC16G5.09:pep	10	10	10	22.4	510	57.643
SPBC1921.03c	1	SPBC1921.03c:pep	8	8	8	18.3	596	66.534
SPBC405.06	1	SPBC405.06:pep	12	12	12	29.3	413	46.126
SPAC11D3.18c	1	SPAC11D3.18c:pep	5	5	5	17.3	498	55.351
SPBP22H7.07	1	SPBP22H7.07:pep	10	10	10	30.9	473	52.418
SPBC8D2.15	1	SPBC8D2.15:pep	10	10	10	40.8	370	41.69
SPCC1827.04	1	SPCC1827.04:pep	13	13	13	26.2	600	68.792
SPCC4G3.13c	1	SPCC4G3.13c:pep	8	8	8	62.8	215	23.524
SPCC18B5.08c	1	SPCC18B5.08c:pep	10	10	10	10.9	973	111.25
SPBP35G2.02	1	SPBP35G2.02:pep	6	6	6	52.7	207	23.397
SPAC637.08	1	SPAC637.08:pep	7	7	7	34.7	317	34.261
SPAC1834.08	1	SPAC1834.08:pep	12	12	12	9.9	1639	184.58
SPAC17A5.16	1	SPAC17A5.16:pep	14	14	14	19.7	925	104.83
SPAC1687.11	1	SPAC1687.11:pep	10	10	10	20	802	90.905
SPAC13G7.12c	1	SPAC13G7.12c:pep	11	11	11	23.2	456	52.535
SPCC4B3.17	1	SPCC4B3.17:pep	7	7	7	26.9	283	32.972
SPAC56E4.05	1	SPAC56E4.05:pep	2	2	2	20.3	192	22.104
SPAC17A2.14	1	SPAC17A2.14:pep	6	6	6	17.5	617	71.197
SPAC8E11.05c	1	SPAC8E11.05c:pep	8	8	8	36.7	338	38.2
SPBC337.13c	1	SPBC337.13c:pep	8	8	8	33.8	308	35.01
SPAC29B12.08	1	SPAC29B12.08:pep	6	6	6	12	689	75.679
SPBC2A9.06c	1	SPBC2A9.06c:pep	9	9	9	48.1	258	29.862
SPAC343.02	1	SPAC343.02:pep	9	9	9	33.5	182	21.373
SPBC13A2.02;REV__SPAC323.05c	2	SPBC13A2.02:pep;REV__SPAC323.05c:pep	13;1	13;1	13;1	22.3	803;231	90.611
SPAC4F10.04	1	SPAC4F10.04:pep	10	10	10	33.2	325	37.169
SPAC9G1.12	1	SPAC9G1.12:pep	12	12	12	36.5	364	41.733
SPCC4G3.16	1	SPCC4G3.16:pep	9	9	9	24.7	405	45.604
SPBC14C8.12	1	SPBC14C8.12:pep	4	4	4	40.8	125	14.3
SPBC1709.15c	1	SPBC1709.15c:pep	15	15	15	21.6	797	89.45
SPBC1778.03c	1	SPBC1778.03c:pep	10	10	10	28.7	376	42.807
SPAC23D3.16	1	SPAC23D3.16:pep	4	4	4	77.8	81	8.9751
SPAC27E2.09	1	SPAC27E2.09:pep	10	10	10	5.7	2310	264.62
SPAC644.09	1	SPAC644.09:pep	5	5	5	30	237	26.393
SPCC285.14	1	SPCC285.14:pep	9	9	9	10.4	1150	132.87
SPBC1711.05	1	SPBC1711.05:pep	5	5	5	13.3	451	47.427
SPCC1795.10c	1	SPCC1795.10c:pep	3	3	3	11.9	227	25.801
SPAC27F1.08	1	SPAC27F1.08:pep	5	5	5	11.5	521	57.641
SPBC36.03c	1	SPBC36.03c:pep	9	9	9	24.2	538	59.169
SPAC3F10.19	1	SPAC3F10.19:pep	3	3	3	43.1	102	11.834
SPAC1002.07c	1	SPAC1002.07c:pep	8	8	8	44	168	19.149
SPAC1834.06c	1	SPAC1834.06c:pep	9	9	9	29.8	329	38.521
SPAC15E1.08	1	SPAC15E1.08:pep	5	5	5	42.4	177	20.305
SPCC4B3.04c	1	SPCC4B3.04c:pep	16	16	16	15.3	1316	147.84
SPBC16E9.06c	1	SPBC16E9.06c:pep	5	5	5	47.1	102	11.806
SPBC25B2.05	1	SPBC25B2.05:pep	12	12	12	42.2	327	38.587
SPBC25H2.03	1	SPBC25H2.03:pep	16	16	16	22.2	811	92.452
SPAC22H12.05c	1	SPAC22H12.05c:pep	13	13	13	16.8	728	82.588
SPAC27E2.10c	1	SPAC27E2.10c:pep	5	5	5	23.4	342	38.439
SPCC132.01c	1	SPCC132.01c:pep	17	17	17	24.1	1021	114.24
SPAC6G9.08	1	SPAC6G9.08:pep	9	9	9	25.9	468	52.316
SPAC1782.05	1	SPAC1782.05:pep	6	6	6	20.2	352	40.288
SPBC2D10.04	1	SPBC2D10.04:pep	9	9	9	16.7	658	72.731
SPCC330.09	1	SPCC330.09:pep	11	11	11	21.9	634	72.238
SPAC15A10.05c	1	SPAC15A10.05c:pep	6	6	6	31.8	242	26.466
SPBC1105.04c	1	SPBC1105.04c:pep	12	12	12	20.9	522	59.839
SPBC1773.05c	1	SPBC1773.05c:pep	7	7	7	23.9	360	38.851
SPAC25B8.08	1	SPAC25B8.08:pep	11	11	11	20.7	590	68.051
SPAC5H10.09c	1	SPAC5H10.09c:pep	3	3	3	15.7	267	29.111
SPBC1703.14c	1	SPBC1703.14c:pep	16	16	16	21.4	814	93.979
SPCC1827.01c	1	SPCC1827.01c:pep	14	14	14	26.2	652	75.651
SPBC337.15c	1	SPBC337.15c:pep	5	5	5	32.9	216	24.397
SPCC1223.11	1	SPCC1223.11:pep	8	8	8	33.5	370	40.878
SPAC823.12	1	SPAC823.12:pep	15	15	15	18.5	906	102.52
SPAC4F10.15c	1	SPAC4F10.15c:pep	11	11	11	27.7	574	59.605
SPAC4A8.07c	1	SPAC4A8.07c:pep	10	10	10	26.2	458	51.288
SPBC1685.03	1	SPBC1685.03:pep	6	6	6	28.6	189	21.403
SPCC16A11.15c	1	SPCC16A11.15c:pep	3	3	3	29.9	117	12.997
SPCC320.09	1	SPCC320.09:pep	8	8	8	25.8	423	47.234
[truncated: 1,591 more rows]
