# Supplementary material for: Growth-rate-dependent and nutrient-specific gene expression resource allocation in fission yeast
Source: Life Sci Alliance. 2022 Feb 28;5(5):e202101223. doi: 10.26508/lsa.202101223 (PMC8886410; doi:10.26508/lsa.202101223)
Supplement: Supplementary file 3 [file LSA-2021-01223_TableS3.xlsx]

## Sheet: TableS3
PomBaseIDs	medium	replicate	iBAQ	raw	lfq	psi_P
SPBC1815.01	Glu	1	21790000000	392220000000	603070000000	0.0112533
SPBC32F12.11	Glu	1	26547000000	504400000000	759560000000	0.01371
SPBC14F5.04c	Glu	1	12615000000	353220000000	847370000000	0.00651492
SPCC13B11.01	Glu	1	11048000000	198870000000	416820000000	0.00570566
SPAC9.09	Glu	1	4868000000	243400000000	426210000000	0.00251404
SPCC794.09c	Glu	1	8619900000	206880000000	337050000000	0.00445168
SPAC1F8.07c	Glu	1	8228900000	213950000000	434880000000	0.00424975
SPBC19C2.07	Glu	1	15649000000	250390000000	473990000000	0.00808181
SPAC4H3.10c	Glu	1	8978400000	251400000000	489950000000	0.00463683
SPCC1739.13	Glu	1	6280500000	213540000000	426470000000	0.00324352
SPCC24B10.21	Glu	1	6071700000	97147000000	178660000000	0.00313568
SPAC926.04c	Glu	1	4756800000	171250000000	267300000000	0.00245661
SPBC26H8.01	Glu	1	8940700000	151990000000	245590000000	0.00461736
SPAC26F1.06	Glu	1	12020000000	156250000000	288530000000	0.00620764
SPAC29B12.04	Glu	1	2939700000	49975000000	64147000000	0.00151819
SPBC56F2.12	Glu	1	3736500000	78467000000	163520000000	0.00192969
SPBC1604.05	Glu	1	2118300000	55075000000	81373000000	0.00109398
SPBC660.16	Glu	1	3475000000	93825000000	166430000000	0.00179464
SPCP31B10.07;SPAC513.01c	Glu	1	2086000000	95956000000	173670000000	0.0010773
SPCC417.08	Glu	1	2086100000	106390000000	132550000000	0.00107735
SPBC8D2.18c	Glu	1	4198900000	83977000000	173120000000	0.00216849
SPAC1071.10c	Glu	1	3135100000	100320000000	225730000000	0.0016191
SPBC16H5.02	Glu	1	1725400000	79371000000	123210000000	0.00089107
SPAC24C9.12c	Glu	1	2654200000	71664000000	108430000000	0.00137074
SPBC32H8.12c	Glu	1	3978300000	79567000000	118340000000	0.00205456
SPCC1223.02	Glu	1	4228300000	84566000000	153120000000	0.00218367
SPAC12G12.04	Glu	1	1837200000	67976000000	108320000000	0.000948808
SPBP8B7.03c	Glu	1	3402800000	57848000000	98135000000	0.00175735
SPBC14F5.05c	Glu	1	2829300000	62246000000	99206000000	0.00146117
SPAC4A8.11c	Glu	1	421080000	42108000000	59788000000	0.000217464
SPCC1020.06c	Glu	1	2111500000	38007000000	62251000000	0.00109047
SPBC2G5.05	Glu	1	1904900000	66670000000	105280000000	0.000983772
SPAC6B12.15	Glu	1	2512500000	45225000000	88212000000	0.00129756
SPAC9E9.09c	Glu	1	974660000	26316000000	43302000000	0.000503356
SPAC821.10c	Glu	1	3306600000	26453000000	65901000000	0.00170767
SPCC330.06c	Glu	1	2763100000	24868000000	33825000000	0.00142698
SPAC4F8.07c	Glu	1	2971900000	59439000000	79854000000	0.00153482
SPBC215.08c	Glu	1	499340000	32457000000	60529000000	0.00025788
SPAC23C11.05	Glu	1	2477500000	42117000000	109810000000	0.00127949
SPBC428.02c	Glu	1	781110000	17966000000	31925000000	0.000403398
SPBC17G9.11c	Glu	1	376890000	23367000000	38375000000	0.000194642
SPAC8E11.02c	Glu	1	3180800000	47712000000	83515000000	0.0016427
SPAC926.09c	Glu	1	430740000	41351000000	66738000000	0.000222452
SPCC576.03c	Glu	1	3029400000	33324000000	59001000000	0.00156451
SPCC794.12c	Glu	1	2234300000	67029000000	103140000000	0.00115389
SPBC1709.05	Glu	1	3015500000	81419000000	109130000000	0.00155733
SPBC215.05	Glu	1	1237800000	32182000000	56213000000	0.000639253
SPAC25B8.12c	Glu	1	2398800000	38380000000	77439000000	0.00123884
SPAC17A5.03;SPAPB8E5.06c	Glu	1	1822700000	38277000000	64600000000	0.00094132
SPBC28F2.03	Glu	1	5545800000	49912000000	93376000000	0.00286409
SPBC16G5.14c	Glu	1	2231600000	37937000000	66044000000	0.00115249
SPBC24C6.04	Glu	1	1647400000	44480000000	60188000000	0.000850788
SPAC22H12.04c	Glu	1	2684500000	42952000000	72418000000	0.00138639
SPAC589.10c;SPAC6G10.11c;SPBC337.08c	Glu	1	2399800000	16798000000	38888000000	0.00123936
SPBC119.10	Glu	1	560520000	18497000000	26975000000	0.000289476
SPBC428.05c	Glu	1	1127800000	23684000000	46239000000	0.000582444
SPAC664.11	Glu	1	1332600000	47975000000	78821000000	0.000688211
SPBC2G2.04c	Glu	1	1589900000	15899000000	58539000000	0.000821092
SPBC3B8.03	Glu	1	1316900000	31606000000	64596000000	0.000680103
SPCC132.04c	Glu	1	602050000	38531000000	56498000000	0.000310924
SPAC144.03	Glu	1	612920000	13484000000	16650000000	0.000316538
SPAC110.04c	Glu	1	846560000	34709000000	67141000000	0.0004372
SPAC1006.07	Glu	1	1412300000	31071000000	49290000000	0.000729372
SPCC576.08c	Glu	1	1978800000	31661000000	48406000000	0.00102194
SPBC11C11.09c;SPAC3H5.12c	Glu	1	1972500000	21698000000	30779000000	0.00101868
SPAC24H6.07	Glu	1	2453700000	26991000000	47325000000	0.0012672
SPCC1259.01c;SPBC16D10.11c	Glu	1	4951800000	44566000000	82418000000	0.00255732
SPAC26H5.10c	Glu	1	2878100000	23025000000	36341000000	0.00148637
SPBC27.08c	Glu	1	1297000000	37614000000	64872000000	0.000669826
SPAC31G5.03;SPAC144.11	Glu	1	3264600000	29381000000	39702000000	0.00168598
SPBC18H10.12c	Glu	1	2223400000	31128000000	53478000000	0.00114826
SPAC227.18	Glu	1	802360000	15245000000	21013000000	0.000414373
SPBC839.04;SPBC2F12.07c;SPAC1F7.13c	Glu	1	2006100000	24073000000	47795000000	0.00103604
SPBP8B7.05c	Glu	1	489000000	10269000000	16253000000	0.00025254
SPBC1105.02c	Glu	1	1624700000	35743000000	60371000000	0.000839064
SPAC328.10c	Glu	1	2574400000	28318000000	42870000000	0.00132953
SPBC19F8.08	Glu	1	1982000000	29731000000	48904000000	0.00102359
SPCPB16A4.03c	Glu	1	862150000	30175000000	53651000000	0.000445251
SPAC3A12.10;SPAC26A3.04	Glu	1	3022200000	27200000000	54061000000	0.00156079
SPCC622.12c	Glu	1	472220000	12278000000	21541000000	0.000243875
SPBC4F6.04	Glu	1	4963200000	24816000000	51180000000	0.00256321
SPBP16F5.03c	Glu	1	61811000	13784000000	41554000000	3.19218e-05
SPAC521.05;SPAC2C4.16c	Glu	1	4195800000	33566000000	70808000000	0.00216689
SPAC56E4.04c	Glu	1	153030000	18823000000	25955000000	7.90312e-05
SPBC530.10c	Glu	1	845470000	13528000000	16359000000	0.000436637
SPAC17G8.06c	Glu	1	579780000	17393000000	28934000000	0.000299423
SPAC29A4.02c	Glu	1	899020000	20678000000	47091000000	0.000464292
SPBC25D12.04	Glu	1	407060000	9769300000	17426000000	0.000210223
SPAC1039.06	Glu	1	58501000	1462500000	3995200000	3.02124e-05
SPBC29A3.04	Glu	1	1619600000	27534000000	52767000000	0.00083643
SPBC18E5.04	Glu	1	1800000000	16200000000	38797000000	0.000929597
SPAC56E4.03	Glu	1	520850000	10938000000	24377000000	0.000268989
SPAC3A11.07	Glu	1	539570000	15108000000	28256000000	0.000278657
SPBC4F6.18c	Glu	1	748330000	8980000000	15873000000	0.000386469
SPAC3C7.14c	Glu	1	2405700000	19246000000	34061000000	0.00124241
SPAC22A12.15c	Glu	1	793930000	24612000000	33899000000	0.000410019
SPAP7G5.04c	Glu	1	232110000	17408000000	23549000000	0.000119871
SPAC1565.08	Glu	1	475350000	21866000000	23841000000	0.000245491
SPAC24C9.06c	Glu	1	530500000	17506000000	28692000000	0.000273973
SPAC24H6.04	Glu	1	843400000	18555000000	21266000000	0.000435568
SPCC777.09c	Glu	1	577960000	15605000000	25418000000	0.000298483
SPCC1450.04	Glu	1	2463700000	27100000000	37299000000	0.00127236
SPBC215.09c	Glu	1	1110400000	23319000000	30813000000	0.000573458
SPAC6G10.08	Glu	1	547500000	13687000000	19063000000	0.000282752
SPAC6F6.07c	Glu	1	2935500000	26419000000	23627000000	0.00151602
SPBC1703.07	Glu	1	387980000	14743000000	23168000000	0.000200369
SPAC14C4.14	Glu	1	699700000	20291000000	35172000000	0.000361355
SPCC1322.04	Glu	1	756530000	18157000000	36231000000	0.000390704
SPAC1783.08c	Glu	1	1375100000	15126000000	32404000000	0.00071016
SPAC23H4.06	Glu	1	959320000	18227000000	33871000000	0.000495434
SPBC17G9.10;SPAC26A3.07c	Glu	1	1772800000	14183000000	29171000000	0.000915549
SPCC364.07	Glu	1	1169800000	30414000000	33057000000	0.000604135
SPAC5D6.01;SPAC22A12.04c	Glu	1	2539000000	20312000000	48593000000	0.00131125
SPBC18H10.13;SPAC3H5.05c	Glu	1	3138300000	21968000000	43703000000	0.00162075
SPAC7D4.07c	Glu	1	2955200000	17731000000	45891000000	0.00152619
SPBP8B7.06	Glu	1	1728000000	10368000000	17655000000	0.000892413
SPAC9E9.11;SPCC1281.04	Glu	1	480160000	9123000000	16331000000	0.000247975
SPBC8D2.06	Glu	1	282350000	14118000000	18162000000	0.000145818
SPCC1827.06c	Glu	1	1214800000	23082000000	32263000000	0.000627374
SPAC20G4.06c	Glu	1	1722900000	13783000000	37264000000	0.000889779
SPAPJ698.02c	Glu	1	2282300000	29670000000	40819000000	0.00117868
SPAC26F1.07	Glu	1	827840000	14901000000	28332000000	0.000427532
SPAC1834.02	Glu	1	187220000	14978000000	20037000000	9.66884e-05
SPAC10F6.06	Glu	1	859640000	14614000000	26342000000	0.000443955
SPCC622.18	Glu	1	3268100000	29413000000	47240000000	0.00168779
SPAC1002.09c	Glu	1	426830000	12805000000	25925000000	0.000220433
SPAC19A8.15	Glu	1	534440000	18171000000	24796000000	0.000276008
SPAPB1E7.07	Glu	1	163390000	17483000000	26665000000	8.43816e-05
SPCC576.09	Glu	1	2047500000	12285000000	23618000000	0.00105742
SPAC10F6.01c	Glu	1	282120000	20313000000	21820000000	0.000145699
SPBC25H2.05	Glu	1	1985300000	21838000000	44688000000	0.00102529
SPAC3C7.11c	Glu	1	485920000	14092000000	21112000000	0.00025095
SPAC6F12.13c	Glu	1	598400000	9574400000	12891000000	0.000309039
SPBC25H2.02	Glu	1	351990000	14080000000	26006000000	0.000181783
SPBC1685.10	Glu	1	3962200000	15849000000	19963000000	0.00204625
SPAC3A12.18	Glu	1	293440000	8216300000	12674000000	0.000151545
SPAC26A3.05	Glu	1	182310000	13855000000	16083000000	9.41527e-05
SPAC57A7.04c	Glu	1	935650000	27134000000	41353000000	0.00048321
SPAC23H4.10c	Glu	1	717610000	19375000000	29409000000	0.000370604
SPAPB1E7.12	Glu	1	1926400000	17338000000	24826000000	0.000994875
SPCC965.07c;SPCC191.09c	Glu	1	92151000	1105800000	2564600000	4.75907e-05
SPAC22A12.11	Glu	1	161380000	5487000000	8546500000	8.33435e-05
SPAC664.05	Glu	1	1509500000	15095000000	30038000000	0.00077957
SPAC4G9.16c	Glu	1	923320000	10157000000	23236000000	0.000476842
SPAC18G6.14c	Glu	1	2643300000	23789000000	38868000000	0.00136511
SPBC1A4.02c	Glu	1	891070000	18712000000	28437000000	0.000460187
SPAC22G7.06c	Glu	1	156380000	17202000000	23675000000	8.07613e-05
SPBC1703.13c	Glu	1	592440000	9479000000	14831000000	0.000305961
SPAC4G9.03	Glu	1	831500000	13304000000	22375000000	0.000429422
SPCC31H12.04c;SPCC16C4.13c	Glu	1	1688000000	16880000000	29193000000	0.000871755
SPBC12C2.07c	Glu	1	574930000	9198800000	10896000000	0.000296918
SPCC18.14c	Glu	1	2689100000	24202000000	45315000000	0.00138877
SPAC977.14c;SPAC750.01	Glu	1	79136000	1899300000	2938600000	4.08692e-05
SPAP8A3.07c	Glu	1	1159300000	20867000000	30747000000	0.000598712
SPAC9E9.03	Glu	1	678210000	23737000000	31303000000	0.000350257
SPCC1223.07c	Glu	1	260310000	8329800000	11572000000	0.000134435
SPAC6C3.04	Glu	1	350390000	8409300000	23073000000	0.000180956
SPAC3G9.11c	Glu	1	776190	26390000	1582000	4.00858e-07
SPCC1795.11	Glu	1	377480000	14344000000	18507000000	0.000194947
SPAC1805.13	Glu	1	2566400000	17964000000	36487000000	0.0013254
SPAC1071.08	Glu	1	2294300000	11471000000	23489000000	0.00118487
SPCC645.14c	Glu	1	576260000	20745000000	28383000000	0.000297605
SPBC3E7.16c	Glu	1	406300000	11783000000	16949000000	0.000209831
SPAC1F12.02c	Glu	1	1406300000	12657000000	16425000000	0.000726273
SPCC1183.08c	Glu	1	1287800000	11590000000	21144000000	0.000665075
SPAP7G5.02c	Glu	1	396230000	12679000000	17973000000	0.00020463
SPAC521.03	Glu	1	466030000	6990500000	19714000000	0.000240678
SPBC11C11.07	Glu	1	1201300000	12013000000	22117000000	0.000620403
SPAC1F5.02	Glu	1	370520000	10375000000	13742000000	0.000191352
SPCC16A11.10c	Glu	1	900420000	6302900000	11230000000	0.000465015
SPAC1556.07	Glu	1	789110000	12626000000	14019000000	0.00040753
SPBC336.10c	Glu	1	618420000	5565800000	10302000000	0.000319378
SPAC222.12c	Glu	1	1021300000	26553000000	37587000000	0.000527443
SPBC1778.06c	Glu	1	213880000	8127300000	11880000000	0.000110457
SPBC18E5.06	Glu	1	2329500000	11647000000	13028000000	0.00120305
SPACUNK4.10	Glu	1	883990000	17680000000	22225000000	0.00045653
SPCC736.15	Glu	1	701570000	11927000000	16681000000	0.000362321
SPAC10F6.13c	Glu	1	322620000	7743000000	12491000000	0.000166615
SPBC1539.03c	Glu	1	283270000	7081700000	10787000000	0.000146293
SPAC343.05	Glu	1	297940000	10726000000	13533000000	0.000153869
SPAC26F1.13c	Glu	1	195210000	11908000000	20535000000	0.000100815
SPAC22A12.16	Glu	1	490140000	9802700000	12188000000	0.000253129
SPBC1773.10c	Glu	1	255780000	7417600000	12997000000	0.000132096
SPBC1921.05	Glu	1	149350000	7617000000	12082000000	7.71307e-05
SPBC2G5.06c	Glu	1	354850000	10646000000	15545000000	0.00018326
SPBC14F5.09c	Glu	1	442380000	11502000000	21586000000	0.000228464
SPAC26H5.09c	Glu	1	728170000	13835000000	34956000000	0.000376058
SPBC1289.03c	Glu	1	1347700000	12130000000	15887000000	0.00069601
SPBC17G9.03c	Glu	1	408870000	12266000000	12946000000	0.000211158
SPBC18H10.14;SPAC664.04c	Glu	1	2042900000	22472000000	36267000000	0.00105504
SPBC25B2.09c	Glu	1	206400000	8462300000	13532000000	0.000106594
SPAC4G9.09c	Glu	1	177510000	7277700000	11212000000	9.16737e-05
SPAC31G5.04	Glu	1	599660000	11993000000	21765000000	0.00030969
SPAC17A5.15c	Glu	1	216610000	8881100000	13751000000	0.000111867
SPBC776.03	Glu	1	702680000	14054000000	28126000000	0.000362894
SPAC13G6.02c	Glu	1	801760000	12828000000	16383000000	0.000414063
SPAC25G10.08	Glu	1	226320000	9505600000	14421000000	0.000116881
SPAC9E9.06c	Glu	1	445970000	11595000000	14763000000	0.000230318
SPBC1709.02c	Glu	1	221810000	11534000000	14226000000	0.000114552
SPAC1F12.07	Glu	1	589420000	10610000000	17641000000	0.000304402
SPBC839.16	Glu	1	269270000	14541000000	21208000000	0.000139063
SPCC550.06c	Glu	1	1849500000	11097000000	17440000000	0.000955161
SPCC24B10.09	Glu	1	2501800000	15011000000	21432000000	0.00129204
SPAC6F12.10c	Glu	1	145510000	9458100000	12823000000	7.51476e-05
SPAC1556.02c	Glu	1	416830000	14172000000	20242000000	0.000215269
SPBC409.10	Glu	1	272560000	5723700000	6792900000	0.000140762
SPBC428.11	Glu	1	738190000	15502000000	16001000000	0.000381233
SPBC21C3.08c	Glu	1	1033000000	21692000000	34200000000	0.000533485
SPBC11B10.02c	Glu	1	343000000	7203100000	13797000000	0.00017714
SPBC1604.21c	Glu	1	162360000	8929800000	12081000000	8.38496e-05
SPBC16A3.08c	Glu	1	1392300000	15315000000	32766000000	0.000719043
SPBC32F12.10	Glu	1	274480000	8509000000	10729000000	0.000141753
SPAC23A1.11	Glu	1	1006900000	10069000000	16074000000	0.000520006
SPCC1223.08c	Glu	1	398460000	9961500000	12268000000	0.000205782
SPBC17G9.07	Glu	1	1994100000	11965000000	21404000000	0.00102984
SPCC1322.11;SPAC3G9.03	Glu	1	2335100000	21015000000	30132000000	0.00120595
SPCC70.03c	Glu	1	157690000	4573100000	9000000000	8.14378e-05
SPAC13A11.05	Glu	1	182520000	5840600000	7841600000	9.42611e-05
SPBC460.02c	Glu	1	330660000	5290600000	7310400000	0.000170767
SPCC550.14	Glu	1	132940000	9305800000	14622000000	6.86559e-05
SPBP22H7.08	Glu	1	2026800000	14188000000	25681000000	0.00104673
SPAC17A2.13c	Glu	1	439830000	7477100000	15542000000	0.000227147
SPAC3H5.07	Glu	1	770200000	10783000000	12702000000	0.000397764
SPAC4F8.14c	Glu	1	631750000	14530000000	26274000000	0.000326263
SPAC26F1.03	Glu	1	274780000	6319900000	9485200000	0.000141908
SPCC23B6.01c	Glu	1	188640000	6036400000	8798300000	9.74217e-05
SPAC3F10.03	Glu	1	269830000	9443900000	12817000000	0.000139352
SPCC191.02c	Glu	1	270080000	9992800000	12403000000	0.000139481
SPBP35G2.07	Glu	1	235610000	8953200000	12950000000	0.000121679
SPBC1773.07c	Glu	1	524480000	6293800000	8923200000	0.000270864
SPBC2F12.14c	Glu	1	587310000	12334000000	13634000000	0.000303312
SPAC4A8.04	Glu	1	57281000	630090000	1084500000	2.95823e-05
SPBC19C7.06	Glu	1	270640000	11367000000	15954000000	0.00013977
SPAC1687.06c	Glu	1	1720800000	13767000000	16399000000	0.000888694
SPBC1703.10	Glu	1	422590000	5916200000	7150800000	0.000218243
SPBC16C6.11	Glu	1	1249000000	11241000000	20172000000	0.000645037
SPBC17G9.09	Glu	1	429000000	9009000000	13659000000	0.000221554
SPBC29B5.03c	Glu	1	2264100000	11320000000	17794000000	0.00116928
SPBP4G3.02	Glu	1	2049700000	22547000000	36471000000	0.00105855
SPAC27F1.02c	Glu	1	477770000	4777700000	7736500000	0.000246741
SPBC2F12.04	Glu	1	1687300000	16873000000	29788000000	0.000871394
SPCC622.09	Glu	1	796940000	5578600000	11497000000	0.000411574
SPCC962.04	Glu	1	3340800000	20045000000	26417000000	0.00172533
SPAC23C11.09	Glu	1	134490000	7396900000	9254400000	6.94564e-05
SPCC330.14c;SPAC6G9.09c	Glu	1	1318900000	10551000000	35226000000	0.000681136
SPAC24C9.08	Glu	1	82104000	2381000000	4633000000	4.2402e-05
SPCC1322.13	Glu	1	217000000	6076100000	7203800000	0.000112068
SPBC2D10.10c	Glu	1	373700000	6726600000	11880000000	0.000192995
SPAC5H10.03	Glu	1	910030000	10920000000	12654000000	0.000469978
SPAC13G6.06c	Glu	1	163240000	8488500000	9487900000	8.43041e-05
SPAC23D3.04c	Glu	1	396150000	8715200000	15438000000	0.000204589
SPBC16G5.05c	Glu	1	471900000	7078600000	10117000000	0.000243709
SPAC637.05c	Glu	1	324580000	8763800000	14796000000	0.000167627
SPCC794.07	Glu	1	320290000	8648000000	13593000000	0.000165411
SPAC19A8.04	Glu	1	224700000	6965700000	9725600000	0.000116045
SPBC685.07c	Glu	1	3142100000	18852000000	38381000000	0.00162271
SPAC11E3.15	Glu	1	2314400000	11572000000	36095000000	0.00119525
SPAC17G6.14c	Glu	1	466760000	8401700000	12815000000	0.000241055
SPAC9G1.03c	Glu	1	1915100000	11490000000	18135000000	0.000989039
SPBC1711.13	Glu	1	256050000	4864900000	12410000000	0.000132235
SPBC17D11.05	Glu	1	143170000	7874500000	9711300000	7.39391e-05
SPAC29A4.15	Glu	1	297850000	8637500000	14430000000	0.000153822
SPAC25G10.05c	Glu	1	504260000	7564000000	10098000000	0.000260421
SPAC11D3.07c	Glu	1	167290000	4684200000	11089000000	8.63957e-05
SPCC1672.05c	Glu	1	239880000	6236800000	7805600000	0.000123884
SPAC4A8.16c	Glu	1	145950000	5984000000	8347700000	7.53748e-05
SPCC613.10	Glu	1	371070000	9647900000	16110000000	0.000191636
SPBC8D2.03c;SPBC1105.12;SPAC1834.03c	Glu	1	1382800000	8296500000	11340000000	0.000714137
SPAC19G12.09	Glu	1	168210000	3027800000	8267000000	8.68708e-05
SPCC1827.03c	Glu	1	376130000	9779400000	14856000000	0.00019425
SPAC959.08	Glu	1	1362500000	6812400000	12333000000	0.000703653
SPBC1198.08	Glu	1	279400000	5308700000	9669800000	0.000144294
SPAC343.16	Glu	1	150460000	6018400000	9122600000	7.7704e-05
SPBP16F5.08c	Glu	1	152340000	3808400000	7222000000	7.86749e-05
SPCC306.09c	Glu	1	188800000	5663900000	7113100000	9.75044e-05
SPBC530.07c	Glu	1	554570000	8318600000	10987000000	0.000286404
SPBC4C3.10c	Glu	1	234250000	3513700000	6334900000	0.000120977
SPBC1921.01c	Glu	1	649950000	5849500000	11744000000	0.000335662
SPBC26H8.07c	Glu	1	563080000	7883100000	10544000000	0.000290799
SPCC584.01c	Glu	1	236480000	11114000000	14584000000	0.000122128
SPBC3F6.03	Glu	1	650900000	7810800000	10867000000	0.000336152
SPBC11C11.06c	Glu	1	132410000	1191700000	2112700000	6.83822e-05
SPBC1734.11	Glu	1	481130000	8179200000	10436000000	0.000248476
SPBC15D4.15	Glu	1	662090000	11256000000	19889000000	0.000341931
SPAC3G9.09c	Glu	1	240870000	4817300000	7947700000	0.000124396
SPBC1539.06	Glu	1	641130000	3846800000	5121200000	0.000331107
SPBC18H10.02	Glu	1	239120000	6456100000	9278000000	0.000123492
SPBC4F6.05c	Glu	1	53125000	850010000	9346800000	2.7436e-05
SPBC1711.06	Glu	1	781760000	13290000000	13255000000	0.000403734
SPBC21C3.13	Glu	1	999600000	8996400000	11611000000	0.000516236
SPBP8B7.18c	Glu	1	286960000	7174000000	10711000000	0.000148198
SPBC1773.03c	Glu	1	9729600	262700000	993680000	5.02478e-06
SPBP19A11.03c	Glu	1	106380000	5212800000	7370600000	5.49392e-05
SPBC16D10.08c	Glu	1	122020000	5246700000	7153300000	6.30163e-05
SPBC405.01	Glu	1	130760000	5622600000	8887000000	6.753e-05
SPBC56F2.02	Glu	1	1252400000	10019000000	19221000000	0.000646793
SPBC725.01	Glu	1	147190000	3532500000	3945400000	7.60152e-05
SPAC57A7.12	Glu	1	375650000	9015700000	12968000000	0.000194002
SPBC902.05c	Glu	1	209670000	4403100000	8071600000	0.000108283
SPAC4D7.05	Glu	1	328640000	6901400000	9274900000	0.000169724
SPBC839.05c	Glu	1	1196500000	8375200000	7793900000	0.000617924
SPAC30C2.04	Glu	1	289780000	7244400000	8841900000	0.000149655
SPBC418.01c	Glu	1	223610000	7602900000	9452700000	0.000115482
SPCC5E4.07	Glu	1	1366000000	12294000000	15591000000	0.000705461
SPBC9B6.08	Glu	1	249990000	2999800000	4511000000	0.000129105
SPBP4H10.13;SPAC23C11.02c	Glu	1	1473300000	11786000000	19332000000	0.000760875
SPCC306.08c	Glu	1	409960000	7789300000	16973000000	0.000211721
SPAC1635.01	Glu	1	576040000	8064500000	18929000000	0.000297492
SPBC106.03	Glu	1	113840000	2163000000	3463300000	5.87918e-05
SPAC694.02	Glu	1	62158000	4724000000	6205300000	3.2101e-05
SPAC1B3.03c	Glu	1	456710000	8677500000	11204000000	0.000235865
SPBC685.06	Glu	1	702610000	8431300000	14046000000	0.000362858
SPBC839.17c	Glu	1	864480000	6051400000	8053100000	0.000446454
SPBC30D10.05c	Glu	1	416470000	7496400000	9764600000	0.000215083
SPAC27E2.03c	Glu	1	327640000	6880500000	8634600000	0.000169207
SPAC3G9.06	Glu	1	176680000	4947000000	8175200000	9.12451e-05
SPAC57A7.10c	Glu	1	120980000	4960100000	5920100000	6.24792e-05
SPBC16A3.15c	Glu	1	303360000	6370500000	9827900000	0.000156668
SPAC4F10.14c	Glu	1	1228600000	8600200000	11356000000	0.000634501
SPBC1677.03c	Glu	1	197680000	6127900000	8367300000	0.00010209
SPCC338.14	Glu	1	668200000	9354700000	14804000000	0.000345087
SPAC8E11.10	Glu	1	868810000	11294000000	16013000000	0.000448691
SPBC31F10.06c	Glu	1	514950000	6179500000	8959400000	0.000265942
SPAC16.02c	Glu	1	285430000	4852400000	6186600000	0.000147408
SPBC12C2.12c	Glu	1	111300000	1892100000	3096400000	5.74801e-05
SPBC146.13c	Glu	1	61608000	4435800000	6257000000	3.1817e-05
SPBC17A3.04c	Glu	1	124540000	5355200000	7489800000	6.43178e-05
SPAC139.02c	Glu	1	145560000	2765700000	4140100000	7.51734e-05
SPBC3D6.02	Glu	1	446100000	8922000000	13763000000	0.000230385
SPBC646.05c	Glu	1	185200000	4815100000	6193400000	9.56452e-05
SPAC13A11.02c	Glu	1	185620000	4083600000	5513500000	9.58621e-05
SPAC6G10.09	Glu	1	79005000	3634200000	5585400000	4.08015e-05
SPBC16A3.02c	Glu	1	65873000	1185700000	2052700000	3.40196e-05
SPBP23A10.15c	Glu	1	303050000	7576300000	13901000000	0.000156508
SPAC23H3.09c	Glu	1	250120000	5252600000	6990200000	0.000129173
SPBC17D11.07c	Glu	1	78139000	3985100000	5352200000	4.03543e-05
SPCC1183.02	Glu	1	296680000	4746800000	4548700000	0.000153218
SPCC285.15c;SPAC25G10.06	Glu	1	2961900000	8885700000	15381000000	0.00152965
SPBC32F12.03c	Glu	1	328190000	3281900000	4387400000	0.000169491
SPCC18B5.01c	Glu	1	64396000	4443300000	5888600000	3.32568e-05
SPCC1393.03	Glu	1	866360000	6930800000	8769100000	0.000447425
SPBC16C6.13c	Glu	1	103500000	4760800000	6264900000	5.34518e-05
SPAC11E3.07	Glu	1	458790000	4129100000	4689500000	0.000236939
SPBC1778.01c	Glu	1	190220000	4565400000	8952300000	9.82377e-05
SPAPB8E5.02c;SPAC1420.03	Glu	1	143990000	3887700000	6113100000	7.43626e-05
SPBC31A8.01c	Glu	1	466780000	6068100000	7462500000	0.000241065
SPAC17H9.14c	Glu	1	307940000	5850900000	4950900000	0.000159033
SPAC1296.02	Glu	1	252520000	3030200000	3297300000	0.000130412
SPBPJ4664.04	Glu	1	83425000	5672900000	7434200000	4.30842e-05
SPBP4H10.04	Glu	1	10096000	302890000	3978300000	5.214e-06
SPAC31G5.14	Glu	1	319570000	6711000000	9794000000	0.00016504
SPAC4F10.20	Glu	1	1184700000	7108200000	8313400000	0.00061183
SPAC4A8.15c	Glu	1	1225100000	4900300000	8570100000	0.000632694
SPAC32A11.04c	Glu	1	315680000	5997900000	7609200000	0.000163031
SPAC14C4.11	Glu	1	75997000	3115900000	5696200000	3.92481e-05
SPBC26H8.03	Glu	1	127540000	4719100000	6844900000	6.58671e-05
SPAC10F6.09c	Glu	1	11802000	790710000	2818200000	6.09506e-06
SPAPB17E12.13	Glu	1	599770000	5997700000	10456000000	0.000309747
SPBP4H10.15	Glu	1	163450000	6374500000	6550400000	8.44125e-05
SPAC31G5.05c	Glu	1	462950000	4629500000	6920500000	0.000239087
SPCC364.06	Glu	1	252980000	4047700000	5797500000	0.00013065
SPACUNK4.07c	Glu	1	56656000	3682700000	5464100000	2.92596e-05
SPAC23A1.08c;SPCC1322.15	Glu	1	2019400000	8077400000	9379500000	0.0010429
SPBC16H5.08c	Glu	1	209020000	6061600000	11404000000	0.000107947
SPAC17C9.03	Glu	1	75290000	5119700000	7274700000	3.8883e-05
SPAC1B3.16c	Glu	1	20411000	387810000	903150000	1.05411e-05
SPAP8A3.04c	Glu	1	233050000	1165200000	4787100000	0.000120357
SPCC970.05;SPBC405.07	Glu	1	4704400000	14113000000	19939000000	0.00242955
SPAC1D4.04	Glu	1	209960000	6298700000	8311700000	0.000108432
SPAC458.02c	Glu	1	168580000	4383200000	8393600000	8.70619e-05
SPCC757.07c	Glu	1	41965000	1175000000	2097100000	2.16725e-05
SPBC646.10c	Glu	1	157130000	4242500000	4835200000	8.11486e-05
SPCC1235.14	Glu	1	195700000	3131200000	5268800000	0.000101068
SPAC23G3.06	Glu	1	197070000	5123700000	9065100000	0.000101775
SPBC725.09c	Glu	1	125160000	2503200000	5874700000	6.4638e-05
SPCC1450.13c	Glu	1	87573000	963300000	1947500000	4.52264e-05
SPAC1F7.05	Glu	1	123070000	5169100000	6560800000	6.35586e-05
SPACUNK4.16c	Glu	1	74778000	3215500000	3352900000	3.86185e-05
SPAC11H11.06	Glu	1	158170000	2688800000	5903700000	8.16857e-05
SPCC613.06	Glu	1	455190000	3641500000	5398500000	0.00023508
SPCC584.04;REV__SPCC584.04	Glu	1	134080000	4827000000	9628600000	6.92446e-05
SPCC1840.02c	Glu	1	48590000	3644200000	4111000000	2.50939e-05
SPAC18G6.04c	Glu	1	120360000	3249600000	5821200000	6.2159e-05
SPBC1A4.08c	Glu	1	181230000	6161800000	6863300000	9.35949e-05
SPBC8D2.20c	Glu	1	81743000	5803800000	7373700000	4.22156e-05
SPBC18E5.02c	Glu	1	102400000	2457600000	3727200000	5.28837e-05
SPAC3H8.10	Glu	1	177590000	2841400000	4025400000	9.1715e-05
SPBC646.16	Glu	1	205000000	3485000000	5882200000	0.000105871
SPCC1223.14	Glu	1	165870000	3649200000	4160800000	8.56623e-05
SPBC12C2.04	Glu	1	178270000	3030600000	5991600000	9.20662e-05
SPBC146.14c	Glu	1	96633000	4155200000	6957100000	4.99054e-05
SPAC1039.10	Glu	1	1277300	12773000	36856000	6.59652e-07
SPBC365.14c	Glu	1	214660000	3863800000	5224800000	0.00011086
SPAC4D7.08c	Glu	1	107380000	3221500000	3826500000	5.54556e-05
SPBC106.06	Glu	1	166170000	4819000000	5072200000	8.58173e-05
SPAC23C4.02	Glu	1	149010000	4768200000	5202200000	7.69551e-05
SPAC19G12.10c	Glu	1	80891000	2669400000	3834900000	4.17756e-05
SPAC3A12.14	Glu	1	140210000	981460000	1348100000	7.24104e-05
SPAC1805.11c	Glu	1	2543900000	10176000000	19260000000	0.00131378
SPAC1A6.04c	Glu	1	606310000	10307000000	17761000000	0.000313124
SPBC19F5.04	Glu	1	188870000	5288300000	9383100000	9.75405e-05
SPCC1450.07c	Glu	1	17046000	272740000	329250000	8.80328e-06
SPBC530.14c	Glu	1	2275900	61450000	3569600000	1.17537e-06
SPAC31G5.16c	Glu	1	181280000	2537900000	3246500000	9.36207e-05
SPBC342.02	Glu	1	59020000	3128000000	4046100000	3.04804e-05
SPAC1782.11	Glu	1	817890000	6543100000	12294000000	0.000422393
SPCC1753.04	Glu	1	187440000	4123600000	4603100000	9.6802e-05
SPAC18G6.05c	Glu	1	26670000	3733800000	4946200000	1.37735e-05
SPAC2G11.07c	Glu	1	178520000	4641600000	4732500000	9.21953e-05
SPAC4G9.12	Glu	1	354170000	3541700000	11043000000	0.000182908
SPCC1281.06c	Glu	1	182070000	3823400000	4832600000	9.40287e-05
SPAC140.01	Glu	1	400680000	4808100000	5914000000	0.000206928
SPBC14F5.03c	Glu	1	82255000	4441800000	5734100000	4.248e-05
SPCC1442.09	Glu	1	123620000	3461500000	4236300000	6.38426e-05
SPBC646.13	Glu	1	142410000	3132900000	4353800000	7.35466e-05
SPBC16C6.08c	Glu	1	282310000	3670000000	5715300000	0.000145797
SPAC3C7.08c	Glu	1	70856000	4038800000	4342100000	3.65931e-05
SPCC1906.01	Glu	1	451550000	8579500000	13289000000	0.0002332
SPBC8E4.04	Glu	1	218960000	4160200000	8518300000	0.00011308
SPAC1687.04	Glu	1	158620000	3489700000	4260100000	8.19181e-05
SPAC1142.02c	Glu	1	282240000	4515900000	5957800000	0.000145761
SPBC18H10.04c	Glu	1	239650000	3115400000	4660700000	0.000123765
SPAC9E9.13	Glu	1	555250000	3331500000	6004800000	0.000286755
SPAC2E1P3.04	Glu	1	32663000	1077900000	1884700000	1.68686e-05
SPAC1142.01	Glu	1	18110000	543300000	3349000000	9.35278e-06
SPBC14C8.04	Glu	1	242660000	4125200000	7364400000	0.00012532
SPAC29A4.04c	Glu	1	120260000	3367400000	3768000000	6.21074e-05
SPBC354.12	Glu	1	241400000	5069300000	5957800000	0.000124669
SPAC637.07	Glu	1	164780000	4943300000	7472200000	8.50994e-05
SPAC1805.02c	Glu	1	115130000	1381600000	3935300000	5.9458e-05
SPBC18E5.07	Glu	1	133490000	3871100000	4930500000	6.89399e-05
SPCC965.06	Glu	1	44998000	1035000000	1328500000	2.32389e-05
SPBC9B6.04c	Glu	1	243040000	5833000000	6616100000	0.000125516
SPCC11E10.01	Glu	1	110390000	2097500000	2804100000	5.70101e-05
SPAC24H6.10c	Glu	1	280990000	4495900000	6050300000	0.000145115
SPAC8C9.04	Glu	1	103180000	2476400000	3775700000	5.32865e-05
SPCC338.10c	Glu	1	124170000	1365900000	5691700000	6.41267e-05
SPAC22F8.08	Glu	1	72017000	2520600000	3738100000	3.71926e-05
SPBC17A3.07	Glu	1	192410000	3271000000	4190000000	9.93687e-05
SPBC16E9.05	Glu	1	236270000	4252900000	7032100000	0.00012202
SPCC1322.14c	Glu	1	78733000	3070600000	4010000000	4.06611e-05
SPAC630.03	Glu	1	189030000	4158700000	3965000000	9.76231e-05
SPBC2G2.12	Glu	1	151760000	4856400000	5614700000	7.83753e-05
SPBC8D2.04;SPBC1105.11c;SPAC1834.04	Glu	1	607240000	2429000000	4098400000	0.000313605
SPCC16C4.10	Glu	1	235920000	3302900000	3369700000	0.000121839
SPBC646.11	Glu	1	130750000	3660900000	4873300000	6.75249e-05
SPBC337.05c	Glu	1	130730000	4836900000	7111100000	6.75145e-05
SPBC30D10.13c	Glu	1	318220000	5091500000	7403300000	0.000164342
SPBC13G1.02	Glu	1	274870000	6047100000	9838000000	0.000141955
SPCC1672.02c	Glu	1	295480000	4432300000	5761600000	0.000152598
SPCC1442.06	Glu	1	130140000	1821900000	4175800000	6.72098e-05
SPAC1486.01	Glu	1	394690000	4341500000	8069300000	0.000203835
SPCC645.08c	Glu	1	106890000	4275500000	6336000000	5.52026e-05
SPBC14F5.06	Glu	1	93040000	2977300000	6764200000	4.80498e-05
SPAC6G10.04c	Glu	1	222380000	3113300000	5138100000	0.000114847
SPBC25H2.12c	Glu	1	119850000	4434400000	6518200000	6.18956e-05
SPCC1682.16	Glu	1	140160000	3223700000	4806000000	7.23846e-05
SPBC16C6.07c	Glu	1	103460000	3207200000	3409100000	5.34312e-05
SPAC1071.07c	Glu	1	421360000	3370900000	4896300000	0.000217608
SPCC18.18c	Glu	1	159600000	3830500000	3451200000	8.24242e-05
SPCC364.03	Glu	1	376350000	3763500000	5717100000	0.000194363
SPBC23G7.12c	Glu	1	133370000	3200800000	3820900000	6.8878e-05
SPBP4H10.12	Glu	1	196310000	1766800000	1939800000	0.000101383
SPBC16D10.01c	Glu	1	22742000	318390000	2728800000	1.17449e-05
SPBC582.09	Glu	1	179670000	3054300000	3670200000	9.27892e-05
SPBC12C2.06	Glu	1	96647000	2996100000	4790300000	4.99126e-05
SPBPB21E7.07	Glu	1	72695000	1017700000	1772200000	3.75428e-05
SPBC713.12	Glu	1	251320000	6031600000	7392100000	0.000129792
SPBC21B10.08c	Glu	1	529620000	6355500000	9992300000	0.000273518
SPAC17A2.03c	Glu	1	103690000	1866400000	2541600000	5.35499e-05
SPAC328.03	Glu	1	99775000	2195000000	3669500000	5.15281e-05
SPCC330.05c	Glu	1	133630000	2672500000	3343300000	6.90122e-05
SPAC17G6.06	Glu	1	829630000	4977800000	7057600000	0.000428456
SPCC613.05c	Glu	1	1140200000	6841500000	7320400000	0.000588848
SPAC644.15	Glu	1	2145000000	6435000000	6483400000	0.00110777
SPBC1685.13	Glu	1	151070000	1208600000	3579800000	7.8019e-05
SPAC11G7.03	Glu	1	172120000	3442500000	5023700000	8.88901e-05
SPAC688.11	Glu	1	53123000	2762400000	3159500000	2.7435e-05
SPBC776.09	Glu	1	156850000	4078100000	6833300000	8.1004e-05
SPBC1685.09	Glu	1	1535000000	6139900000	6711900000	0.000792739
SPAC1834.01	Glu	1	109460000	2627100000	3436900000	5.65298e-05
SPAC56F8.03	Glu	1	71263000	3420600000	4215500000	3.68032e-05
SPAC23A1.12c	Glu	1	116510000	3961400000	5790500000	6.01707e-05
SPBC4.06	Glu	1	135540000	3659600000	5760400000	6.99986e-05
SPAC15E1.03	Glu	1	844930000	2534800000	4927100000	0.000436358
SPBC725.15	Glu	1	290590000	3196500000	8557200000	0.000150073
SPAC22F8.06	Glu	1	276030000	2484300000	4107700000	0.000142554
SPAC1F7.04	Glu	1	273320000	2733200000	4121700000	0.000141154
SPAC1002.17c	Glu	1	22595000	248540000	758060000	1.1669e-05
SPAC806.04c	Glu	1	72764000	1600800000	2353700000	3.75784e-05
SPBC4F6.17c	Glu	1	26381000	1266300000	1396700000	1.36243e-05
SPAC22F8.05	Glu	1	12939000	504610000	1153200000	6.68225e-06
SPAC20H4.09	Glu	1	46618000	1212100000	195510000	2.40755e-05
SPCC338.15	Glu	1	129140000	2841100000	4061900000	6.66934e-05
SPAC20G8.06	Glu	1	23909000	2199700000	3150800000	1.23476e-05
SPAC1834.11c	Glu	1	66723000	3136000000	3464800000	3.44586e-05
SPCC162.02c	Glu	1	43761000	2538100000	2940300000	2.26e-05
SPBC428.03c	Glu	1	224580000	3817900000	5965100000	0.000115983
SPAC30.04c	Glu	1	20905000	1149800000	2160200000	1.07962e-05
SPBC713.02c	Glu	1	28234000	1665800000	1979100000	1.45812e-05
SPAPB8E5.09	Glu	1	119420000	2627300000	2854900000	6.16736e-05
SPAC1805.16c	Glu	1	122620000	2207100000	2499500000	6.33262e-05
SPBC56F2.09c	Glu	1	319200000	5426400000	10670000000	0.000164848
SPAC3F10.04	Glu	1	88005000	2816200000	3350300000	4.54495e-05
SPAC13C5.01c	Glu	1	152960000	1835500000	3053400000	7.89951e-05
SPAC3H1.07	Glu	1	228700000	3430500000	3816500000	0.00011811
SPBC146.07	Glu	1	6199500	167390000	4690300000	3.20169e-06
SPBC3F6.02c	Glu	1	170740000	2390400000	2677800000	8.81774e-05
SPCC825.01	Glu	1	61316000	2146100000	2928500000	3.16662e-05
SPBP8B7.25	Glu	1	426840000	4695200000	7032400000	0.000220438
SPBC106.18	Glu	1	557090000	2785500000	5563700000	0.000287705
SPBC660.07	Glu	1	31383000	1380900000	1087600000	1.62075e-05
SPAC8C9.08	Glu	1	252470000	2524700000	2566000000	0.000130386
SPAC1687.21	Glu	1	203030000	2030300000	6002700000	0.000104853
SPBP4H10.11c	Glu	1	79067000	2530100000	3435600000	4.08336e-05
SPBC119.01	Glu	1	74415000	1934800000	3201000000	3.84311e-05
SPAC19G12.15c	Glu	1	65664000	2626600000	3167600000	3.39117e-05
SPAC20G8.04c	Glu	1	73513000	2352400000	2488800000	3.79652e-05
SPBC12C2.11	Glu	1	55178000	1986400000	2558000000	2.84963e-05
SPAC18G6.03	Glu	1	170370000	2044400000	6190400000	8.79863e-05
SPCC1682.09c	Glu	1	93233000	1491700000	2802400000	4.81495e-05
SPAC9G1.05	Glu	1	97869000	3229700000	3524300000	5.05437e-05
SPBC776.15c	Glu	1	74858000	1871500000	2138500000	3.86599e-05
SPBC4.07c	Glu	1	104010000	2600100000	4154600000	5.37152e-05
SPCC1442.16c	Glu	1	168500000	3033100000	4636300000	8.70206e-05
SPAC10F6.03c	Glu	1	114810000	2755400000	3646300000	5.92928e-05
SPAC5H10.06c	Glu	1	439010000	6146200000	8994700000	0.000226723
SPAC6B12.12	Glu	1	105440000	3690500000	4656200000	5.44537e-05
SPCC1672.03c	Glu	1	115430000	3001300000	4149200000	5.9613e-05
SPBC106.04	Glu	1	27975000	1202900000	2632000000	1.44475e-05
SPBC1539.09c	Glu	1	70502000	3031600000	3826200000	3.64102e-05
SPAC22H10.03c	Glu	1	32551000	1074200000	2694700000	1.68107e-05
SPCC663.09c	Glu	1	180460000	2706800000	4559500000	9.31972e-05
SPBC29A10.16c	Glu	1	291510000	1457600000	1775300000	0.000150548
SPBC646.08c	Glu	1	54697000	1750300000	2678900000	2.82479e-05
SPBC23E6.06c	Glu	1	133730000	2005900000	3006800000	6.90639e-05
SPAC1006.01	Glu	1	56239000	731100000	1039100000	2.90442e-05
SPAPB24D3.08c	Glu	1	57776000	1040000000	1863300000	2.9838e-05
SPAC23A1.17	Glu	1	24942000	1646200000	2009700000	1.28811e-05
SPAC23G3.11	Glu	1	163350000	3267100000	5069700000	8.43609e-05
SPAC11D3.02c	Glu	1	217290000	2607500000	2604900000	0.000112218
SPBC3H7.03c	Glu	1	70607000	3389100000	4922500000	3.64645e-05
SPAC3A11.12c	Glu	1	121330000	2426700000	4484400000	6.266e-05
SPBC646.07c	Glu	1	107450000	1719200000	2693200000	5.54918e-05
SPAC631.01c	Glu	1	139510000	2092600000	2843100000	7.20489e-05
SPAC1071.02	Glu	1	13641000	832120000	2627900000	7.04479e-06
SPBC29A10.13	Glu	1	296300000	3851900000	3954200000	0.000153022
SPBC106.16	Glu	1	187250000	2621500000	2460400000	9.67039e-05
SPBC27B12.13	Glu	1	263970000	4487500000	7629500000	0.000136325
SPAC56F8.05c	Glu	1	210160000	3572800000	5664600000	0.000108536
SPAP8A3.11c	Glu	1	2426600	58239000	359080000	1.2532e-06
SPCC965.08c	Glu	1	1240900	31022000	3704200	6.40854e-07
SPBC23G7.15c	Glu	1	154620000	773100000	1340000000	7.98524e-05
SPAC890.08	Glu	1	1369100000	9583800000	16997000000	0.000707062
SPBC30D10.03c	Glu	1	58220000	1106200000	1552600000	3.00673e-05
SPAC57A10.12c	Glu	1	147480000	3981900000	5413800000	7.6165e-05
SPAC23A1.03	Glu	1	245130000	2451300000	4464100000	0.000126596
SPAC13G7.02c	Glu	1	25328000	861140000	1984000000	1.30805e-05
SPAP8A3.08	Glu	1	236120000	2125100000	2461300000	0.000121942
SPAC19A8.05c	Glu	1	8115500	284040000	2655300000	4.19119e-06
SPCC1682.01	Glu	1	292090000	1460400000	2223100000	0.000150848
SPBC83.08	Glu	1	100900000	2623500000	3425900000	5.21091e-05
SPAC959.02	Glu	1	117660000	1882600000	2902000000	6.07646e-05
SPAC1093.02	Glu	1	222600000	2671200000	4878400000	0.00011496
SPAC1B2.04	Glu	1	291020000	2328100000	3072300000	0.000150295
SPBC19F5.03	Glu	1	77920000	2415500000	3761000000	4.02412e-05
SPAC6B12.04c	Glu	1	55959000	1175100000	1778500000	2.88996e-05
SPAC15A10.04c	Glu	1	65660000	1510200000	3036900000	3.39096e-05
SPBC119.02	Glu	1	520710000	2082800000	2402100000	0.000268917
SPAC17H9.16	Glu	1	298730000	1493700000	2293300000	0.000154277
SPBC1711.08	Glu	1	302430000	4234000000	9363800000	0.000156188
SPBC21D10.12	Glu	1	70314000	1125000000	2295700000	3.63131e-05
SPAC23C11.11	Glu	1	85146000	1702900000	2519700000	4.3973e-05
SPBC1604.07	Glu	1	240630000	3368900000	6248000000	0.000124272
SPCP31B10.08c	Glu	1	442520000	3982700000	7192800000	0.000228536
SPAC22E12.17c	Glu	1	61537000	1784600000	2401200000	3.17803e-05
SPAC23C11.13c	Glu	1	211240000	1901200000	2589100000	0.000109093
SPBC8E4.03	Glu	1	25054000	476030000	535090000	1.2939e-05
SPAC22G7.01c	Glu	1	56441000	1636800000	2850500000	2.91485e-05
SPAPB1E7.09	Glu	1	50503000	1565600000	1821900000	2.60819e-05
SPAC23H4.09	Glu	1	176020000	3696500000	4246600000	9.09042e-05
SPBC8E4.01c	Glu	1	126230000	3155700000	5190500000	6.51906e-05
SPCC1223.09	Glu	1	92442000	1386600000	2042100000	4.7741e-05
SPCC23B6.04c	Glu	1	33995000	2243700000	2452100000	1.75565e-05
SPBC3E7.05c	Glu	1	46796000	1684600000	1868300000	2.41674e-05
SPAC19G12.08	Glu	1	140540000	1967600000	3221500000	7.25808e-05
SPAC589.06c	Glu	1	337380000	3373800000	4064700000	0.000174237
SPAC1420.02c	Glu	1	80420000	2412600000	2814900000	4.15323e-05
SPBP8B7.19	Glu	1	35352000	1838300000	2759100000	1.82573e-05
SPAC31G5.17c	Glu	1	819760000	5738300000	7472200000	0.000423359
SPBC1773.04	Glu	1	78919000	1420500000	2022800000	4.07571e-05
SPCC1235.02	Glu	1	134650000	2019800000	2339800000	6.9539e-05
SPBC12D12.03	Glu	1	122690000	3803400000	5185000000	6.33623e-05
SPAC17A2.05	Glu	1	45161000	1219300000	2530000000	2.33231e-05
SPCC737.09c	Glu	1	31149000	1277100000	1407600000	1.60867e-05
SPCC962.01	Glu	1	27495000	1979700000	2498600000	1.41996e-05
SPCC1682.10	Glu	1	118300000	1656200000	2882400000	6.10952e-05
SPCC13B11.04c	Glu	1	51961	675490	596300	2.68349e-08
SPCC1620.06c	Glu	1	118570000	2015700000	4082800000	6.12346e-05
SPAC23G3.01	Glu	1	23911000	1458600000	4269600000	1.23487e-05
SPAC12B10.07	Glu	1	97854000	1467800000	2589500000	5.0536e-05
SPAC823.14	Glu	1	236960000	2369600000	3881300000	0.000122376
SPCC663.01c	Glu	1	35283000	1199600000	1207400000	1.82216e-05
SPAC323.02c	Glu	1	191470000	2680500000	3311800000	9.88833e-05
SPBC36.04	Glu	1	149920000	2398700000	4351800000	7.74251e-05
SPBC16H5.06	Glu	1	205750000	1646000000	2646500000	0.000106258
SPCC757.09c	Glu	1	161460000	2906300000	2834600000	8.33848e-05
SPAC1751.03	Glu	1	223620000	4248800000	7394000000	0.000115487
SPAC29B12.07	Glu	1	5450500	419690000	5285500000	2.81487e-06
SPCC970.03	Glu	1	102540000	1845600000	3955500000	5.2956e-05
SPAC7D4.10	Glu	1	60549000	1513700000	1976600000	3.12701e-05
SPAC922.04	Glu	1	484290000	1937200000	3484300000	0.000250108
SPAC4G9.10	Glu	1	117740000	1766100000	2451300000	6.0806e-05
SPAC21E11.04	Glu	1	28692000	286920000	556360000	1.48178e-05
SPCC162.09c	Glu	1	52561000	2207600000	2989300000	2.71447e-05
SPCC622.08c;SPAC19G12.06c	Glu	1	555930000	2779600000	3935500000	0.000287106
SPBC21H7.07c	Glu	1	33939000	373330000	837830000	1.75275e-05
SPAC513.05	Glu	1	24675000	1381800000	2335000000	1.27432e-05
SPBP19A11.01	Glu	1	306120000	1836700000	1851800000	0.000158093
SPBC25H2.16c	Glu	1	94582000	2080800000	2281000000	4.88462e-05
SPBC18H10.03;REV__SPBC15D4.03	Glu	1	179400000	2691000000	3779000000	9.26498e-05
SPAC1A6.10	Glu	1	55500000	1554000000	2542600000	2.86626e-05
SPBC651.01c	Glu	1	54107000	1785500000	2436800000	2.79432e-05
SPCC1322.05c	Glu	1	34109000	1227900000	1818900000	1.76153e-05
SPAC1952.11c	Glu	1	40154000	1405400000	2452600000	2.07372e-05
SPAC3H1.05	Glu	1	70479000	1832500000	2201100000	3.63984e-05
SPCPJ732.02c	Glu	1	56384000	1860700000	2496900000	2.91191e-05
SPAC607.05	Glu	1	101860000	2240900000	3461500000	5.26048e-05
SPAC12G12.07c	Glu	1	272200000	4355300000	7119600000	0.000140576
SPAC2F3.09	Glu	1	110770000	3212200000	5034100000	5.72063e-05
SPCC1183.07	Glu	1	26961000	2399500000	3091300000	1.39238e-05
SPBC3B9.19	Glu	1	93564000	935640000	2358200000	4.83204e-05
SPBC365.06	Glu	1	319440000	1597200000	2634400000	0.000164972
SPAC767.01c	Glu	1	58316000	2216000000	1929800000	3.01169e-05
SPAC144.12	Glu	1	156260000	2500100000	3667600000	8.06993e-05
SPBC660.11	Glu	1	285550000	4568800000	5857200000	0.00014747
SPAC13D6.02c	Glu	1	334540000	4014500000	6293800000	0.000172771
SPCC70.08c	Glu	1	85943000	945380000	948050000	4.43846e-05
SPCC1259.09c	Glu	1	73982000	1849600000	2294300000	3.82075e-05
SPAC6F6.15	Glu	1	205170000	2872400000	3516400000	0.000105959
SPBC14C8.03	Glu	1	134090000	2815900000	3725700000	6.92498e-05
SPAC1F5.06	Glu	1	65846000	2436300000	4421200000	3.40057e-05
SPAC1142.06	Glu	1	185740000	2600300000	4469300000	9.59241e-05
SPBC16H5.12c	Glu	1	54159000	2112200000	3156700000	2.797e-05
SPAC6F12.07	Glu	1	246350000	1970800000	2715800000	0.000127226
SPAC22A12.07c	Glu	1	45403000	1634500000	1869800000	2.3448e-05
SPAC21E11.08	Glu	1	63208000	1833000000	2792800000	3.26433e-05
SPBC3B9.01	Glu	1	135720000	2578600000	4426000000	7.00916e-05
SPAC1805.17	Glu	1	38627000	1815500000	2273500000	1.99486e-05
SPCC4F11.02	Glu	1	33931000	610750000	1833300000	1.75234e-05
SPAC31A2.04c	Glu	1	146760000	1174100000	1798500000	7.57931e-05
SPBC4C3.03	Glu	1	128900000	2191300000	2314800000	6.65695e-05
SPAC22E12.07	Glu	1	151200000	3175200000	5336400000	7.80861e-05
SPBC16D10.09	Glu	1	195320000	2929800000	4657700000	0.000100872
SPBC29A3.18	Glu	1	273210000	3005400000	3642200000	0.000141097
SPAC6F6.10c	Glu	1	104110000	2082300000	2906400000	5.37668e-05
SPBC365.03c	Glu	1	701700000	4210200000	7528100000	0.000362388
SPCC1281.01;SPAC1527.01	Glu	1	22747000	2024500000	2509100000	1.17475e-05
SPBC354.10	Glu	1	79030000	2370900000	3429500000	4.08145e-05
SPCC1672.06c	Glu	1	27164000	1439700000	1443700000	1.40286e-05
SPAC20G4.08	Glu	1	30813000	1633100000	2119200000	1.59131e-05
SPAC23D3.07	Glu	1	115010000	1725200000	1645400000	5.93961e-05
SPCC297.03	Glu	1	4213600	126410000	102330000	2.17608e-06
SPCC1795.04c	Glu	1	207680000	2284500000	2581200000	0.000107255
SPAC25G10.09c	Glu	1	38236000	2638300000	5254500000	1.97467e-05
SPAC23C11.17	Glu	1	44479000	1156500000	1588700000	2.29709e-05
SPAC3G9.05	Glu	1	12520000	488290000	1281100000	6.46586e-06
SPAC27F1.07	Glu	1	78837000	1813300000	2983400000	4.07148e-05
SPBC3H7.15	Glu	1	64631000	1228000000	1678300000	3.33782e-05
SPCC126.06	Glu	1	85266000	1790600000	2245600000	4.4035e-05
SPBC582.07c	Glu	1	83178000	2162600000	3074300000	4.29567e-05
SPAC821.11	Glu	1	95694000	2870800000	3109200000	4.94205e-05
SPAC4C5.02c	Glu	1	119130000	1191300000	2839500000	6.15238e-05
SPCC5E4.05c	Glu	1	154520000	3708400000	3990700000	7.98007e-05
SPAC26A3.11	Glu	1	94260000	1696700000	2664100000	4.86799e-05
SPAC140.02	Glu	1	184530000	2952500000	4758400000	9.52992e-05
SPAC57A10.10c	Glu	1	141200000	2118000000	3266100000	7.29217e-05
SPBC543.02c	Glu	1	102050000	2449300000	3425700000	5.2703e-05
SPAC644.05c	Glu	1	197090000	1576800000	3395400000	0.000101786
SPAC1F7.12	Glu	1	91471000	1555000000	1787200000	4.72395e-05
SPAPYUK71.03c	Glu	1	20014000	1060700000	1654900000	1.03361e-05
SPBC30D10.14	Glu	1	83367000	1250500000	2403400000	4.30543e-05
SPAC1F5.10	Glu	1	36150000	759150000	1562100000	1.86694e-05
SPAC19G12.05	Glu	1	58210000	1047800000	1683600000	3.00621e-05
SPAC694.04c	Glu	1	71351000	1427000000	2073000000	3.68487e-05
SPBC2G2.11	Glu	1	56636000	1415900000	2232400000	2.92492e-05
SPAC29E6.06c	Glu	1	66222000	2251500000	2907800000	3.41999e-05
SPMIT.11	Glu	1	120420000	963340000	1669500000	6.219e-05
SPBC1D7.04	Glu	1	332430000	3989100000	6857800000	0.000171681
SPBC29A3.12	Glu	1	111330000	1224700000	2174000000	5.74956e-05
SPCP1E11.09c	Glu	1	792390000	2377200000	4643200000	0.000409224
SPBC19C7.07c	Glu	1	409140000	7364500000	1369700000	0.000211297
SPAC3F10.13	Glu	1	12683000	380480000	1671200000	6.55004e-06
SPBC2D10.11c	Glu	1	105040000	1680600000	1922800000	5.42471e-05
SPBC947.15c	Glu	1	58894000	1707900000	2520900000	3.04154e-05
SPBC4.03c	Glu	1	48004000	1728200000	3040200000	2.47913e-05
SPAC22F3.06c	Glu	1	29445000	1678400000	2842300000	1.52067e-05
SPCP1E11.06	Glu	1	29223000	1285800000	1916200000	1.5092e-05
SPCC737.06c	Glu	1	71023000	1065300000	1389800000	3.66793e-05
SPBC215.15	Glu	1	147680000	2510500000	2761100000	7.62682e-05
SPBC582.08	Glu	1	117130000	2693900000	3634300000	6.04909e-05
SPAC2F7.13c	Glu	1	86512000	2162800000	3256600000	4.46785e-05
SPAC13G7.06	Glu	1	124070000	1737000000	2629200000	6.4075e-05
SPAC1039.02	Glu	1	136920000	2738300000	4896100000	7.07113e-05
SPCC338.12	Glu	1	68651000	274600000	346570000	3.54543e-05
SPCC63.14	Glu	1	23438000	1500000000	2165300000	1.21044e-05
SPBC106.17c	Glu	1	58701000	1467500000	2939700000	3.03157e-05
SPAC15F9.03c	Glu	1	352930000	1764600000	3183900000	0.000182268
SPAC24C9.03	Glu	1	191700000	3259000000	4648200000	9.9002e-05
SPAC4A8.13c	Glu	1	98117000	1569900000	2568900000	5.06718e-05
SPBC800.05c	Glu	1	114430000	2288600000	2912400000	5.90965e-05
SPCC576.10c	Glu	1	104670000	2407300000	2894000000	5.4056e-05
SPAC5H10.10	Glu	1	90801000	1997600000	2192200000	4.68935e-05
SPAC3F10.11c	Glu	1	13478000	970390000	1630900000	6.96061e-06
SPBC1703.15c	Glu	1	27741000	693540000	1220700000	1.43266e-05
SPAC222.14c	Glu	1	38003000	1672100000	2113200000	1.96264e-05
SPAC13G6.04	Glu	1	387010000	2322000000	3780300000	0.000199868
SPBC106.15	Glu	1	119070000	1786100000	2142500000	6.14928e-05
SPBC11G11.07	Glu	1	7081300	332820000	1088500000	3.65709e-06
SPAP8A3.12c	Glu	1	31662000	1868100000	2044600000	1.63516e-05
SPCC31H12.07	Glu	1	86070000	2754200000	2508600000	4.44502e-05
SPAC31G5.13	Glu	1	113350000	1813600000	3021700000	5.85388e-05
SPAPB2B4.05	Glu	1	74411000	1637000000	1839500000	3.8429e-05
SPCC736.13	Glu	1	87331000	1397300000	2430700000	4.51014e-05
SPAP8A3.09c	Glu	1	68851000	2203200000	2900800000	3.55576e-05
SPCC737.02c	Glu	1	269110000	1883800000	3691900000	0.00013898
SPCC1223.05c;SPAPB17E12.05	Glu	1	867870000	3471500000	8154300000	0.000448205
SPBC4C3.07	Glu	1	123420000	1604500000	2329600000	6.37393e-05
SPBC577.10	Glu	1	142750000	1713000000	2330900000	7.37222e-05
SPAC637.04	Glu	1	6798600	333130000	2405900000	3.51109e-06
SPBPJ4664.06	Glu	1	27716000	2134200000	2184400000	1.43137e-05
SPAC26A3.12c	Glu	1	9450200	444160000	2480300000	4.88049e-06
SPAC1F7.01c	Glu	1	17986000	1241000000	1803900000	9.28874e-06
SPAC343.10	Glu	1	44100000	1675800000	1264500000	2.27751e-05
SPAC19B12.02c	Glu	1	317950000	3179500000	4168700000	0.000164203
SPBC1539.07c	Glu	1	97829000	1467400000	1744900000	5.05231e-05
SPBC646.09c	Glu	1	178040000	3204700000	5309300000	9.19474e-05
SPBC887.17	Glu	1	7754200	124070000	262250000	4.0046e-06
SPBC1289.06c	Glu	1	33251000	1030800000	1291400000	1.71722e-05
SPAC25B8.10	Glu	1	66850000	935900000	1503800000	3.45242e-05
SPAC1805.08	Glu	1	180940000	1628400000	3082400000	9.34451e-05
SPBP8B7.16c	Glu	1	94968000	2849100000	4769200000	4.90455e-05
SPAC4D7.02c	Glu	1	16552000	364150000	296780000	8.54816e-06
SPCC4B3.01	Glu	1	69948000	1259100000	1742200000	3.61241e-05
SPAC16C9.02c	Glu	1	125670000	1759400000	2216900000	6.49013e-05
SPBC29A3.02c	Glu	1	95232000	1809400000	2778900000	4.91819e-05
SPBC2D10.12	Glu	1	229450000	2982900000	5257800000	0.000118498
SPBC365.16	Glu	1	75422000	829640000	1615100000	3.89511e-05
SPBC365.01	Glu	1	78165000	1876000000	2062300000	4.03677e-05
SPCC31H12.08c	Glu	1	14250000	498750000	1257000000	7.35931e-06
SPBC17G9.06c	Glu	1	79765000	1196500000	2077600000	4.1194e-05
SPCC1442.14c	Glu	1	255670000	2301000000	3401300000	0.000132039
SPBC2G2.16	Glu	1	123130000	2093300000	2946400000	6.35896e-05
SPBC31F10.16	Glu	1	25331000	1038600000	1200400000	1.3082e-05
SPAC2F7.05c	Glu	1	99708000	1994200000	2982000000	5.14935e-05
SPAC222.08c	Glu	1	87909000	967000000	1074900000	4.54e-05
SPCC1450.12	Glu	1	13918000	640250000	1237900000	7.18785e-06
SPAC22H10.12c	Glu	1	67346000	1616300000	1644800000	3.47803e-05
SPBC947.02	Glu	1	40709000	1547000000	2180600000	2.10239e-05
SPBC21C3.15c	Glu	1	90082000	2162000000	3399200000	4.65222e-05
SPBC21B10.10	Glu	1	119760000	1916100000	3119000000	6.18492e-05
SPBC713.03	Glu	1	79002000	2054100000	3527600000	4.08e-05
SPAC29A4.05	Glu	1	190330000	1713000000	1825500000	9.82945e-05
SPAC1B3.06c	Glu	1	80153000	1202300000	1041800000	4.13944e-05
SPBC3D6.13c	Glu	1	40839000	1592700000	1915200000	2.1091e-05
SPBC215.11c	Glu	1	64184000	1347900000	3932500000	3.31474e-05
SPAC688.04c	Glu	1	52754000	422030000	550110000	2.72444e-05
SPCC126.08c	Glu	1	94626000	1608600000	1819400000	4.88689e-05
SPAC23H3.15c	Glu	1	4984200	84731000	229710000	2.57405e-06
SPBC9B6.10	Glu	1	60434000	1692200000	2039900000	3.12107e-05
SPBC29A3.09c	Glu	1	26716000	961790000	1954500000	1.37973e-05
SPBP8B7.11	Glu	1	126170000	2271000000	3374600000	6.51596e-05
SPBC23E6.04c	Glu	1	14880000	1249900000	1664700000	7.68467e-06
SPAC9.03c	Glu	1	7047300	754060000	1321100000	3.63953e-06
SPAC22A12.08c	Glu	1	38560000	1233900000	1776200000	1.9914e-05
SPAC821.05	Glu	1	186860000	2055400000	2967800000	9.65025e-05
SPAPB21F2.02	Glu	1	1263500	121300000	1483600000	6.52525e-07
SPAPB1A10.12c	Glu	1	55079000	991420000	1268200000	2.84451e-05
SPBC1539.04	Glu	1	73409000	1174500000	2512300000	3.79115e-05
SPAC22F3.10c	Glu	1	26667000	1013400000	1206500000	1.3772e-05
SPBC30D10.18c	Glu	1	97346000	876110000	1483900000	5.02736e-05
SPAC18B11.04	Glu	1	26823000	348700000	712050000	1.38525e-05
SPCC417.16	Glu	1	323620000	647240000	929910000	0.000167131
SPBC577.02	Glu	1	1308000000	3924100000	5723300000	0.000675507
SPAC24B11.05	Glu	1	69448000	1041700000	1591500000	3.58659e-05
SPCPB1C11.03	Glu	1	7084600	120440000	171060000	3.65879e-06
SPBC83.17	Glu	1	314010000	2826100000	5147900000	0.000162168
SPBC1271.12	Glu	1	48200000	867600000	1314300000	2.48925e-05
SPBC29A10.08	Glu	1	331570000	5968200000	8958300000	0.000171237
SPBC28F2.11	Glu	1	114090000	2167800000	2913400000	5.89209e-05
SPAC4H3.07c	Glu	1	146330000	1170600000	3069000000	7.5571e-05
SPAC11D3.15	Glu	1	4819800	351850000	362440000	2.48915e-06
SPAC1B1.03c	Glu	1	59192000	1420600000	2394800000	3.05693e-05
SPAC1786.01c	Glu	1	15000000	509990000	799140000	7.74664e-06
SPAC26H5.07c	Glu	1	86005000	1290100000	1394000000	4.44166e-05
SPAC890.07c	Glu	1	61819000	1298200000	1600300000	3.1926e-05
SPBC336.04	Glu	1	2231200	136100000	1211400000	1.15229e-06
SPAC22E12.03c	Glu	1	69459000	833500000	2515100000	3.58716e-05
SPAC4G8.02c	Glu	1	199910000	999570000	976860000	0.000103242
SPAC922.07c	Glu	1	21630000	670530000	973780000	1.11707e-05
SPBC428.16c	Glu	1	79874000	1038400000	1879600000	4.12503e-05
SPCC4B3.07	Glu	1	138170000	1934300000	2938800000	7.13569e-05
SPAC25H1.07	Glu	1	25101000	978920000	2376600000	1.29632e-05
SPCC74.05	Glu	1	825900000	4955400000	7993000000	0.00042653
SPAC513.07	Glu	1	139520000	2371800000	4508200000	7.20541e-05
SPBC26H8.11c	Glu	1	135630000	1491900000	1580400000	7.00451e-05
SPAC1783.05	Glu	1	8120700	544080000	1795600000	4.19388e-06
SPBC839.15c;SPAC23A1.10	Glu	1	41777000	1002600000	892920000	2.15754e-05
SPBC1711.04	Glu	1	87000000	1914000000	2123800000	4.49305e-05
SPCC1840.05c	Glu	1	37728000	1207300000	1417200000	1.94843e-05
SPBC17D1.06	Glu	1	46895000	1547500000	3261300000	2.42186e-05
SPAC1002.18	Glu	1	18436000	479350000	616620000	9.52114e-06
SPAC1B3.01c	Glu	1	201350000	2214900000	3081400000	0.000103986
SPAPYUG7.05	Glu	1	230290000	2993800000	4445900000	0.000118932
SPBC354.07c	Glu	1	95985000	1439800000	1720000000	4.95707e-05
SPBC18E5.01	Glu	1	109880000	1758100000	2906900000	5.67467e-05
SPAC23C11.14	Glu	1	54789000	602680000	1252200000	2.82954e-05
SPCC320.10	Glu	1	42327000	1481400000	1699600000	2.18595e-05
SPAC26A3.16	Glu	1	125000000	1375100000	1972500000	6.45553e-05
SPCC550.11	Glu	1	42374000	1398400000	1638000000	2.18837e-05
SPCC18.16c	Glu	1	43163000	604280000	776850000	2.22912e-05
SPAC20G8.09c	Glu	1	25237000	1413300000	2590300000	1.30335e-05
SPAC9E9.04	Glu	1	180400000	1804000000	2157900000	9.31662e-05
SPAC1486.05	Glu	1	19020000	1198300000	2817300000	9.82274e-06
SPBC3F6.01c	Glu	1	57838000	1330300000	1825600000	2.987e-05
SPCC1223.06	Glu	1	3394400	234210000	375870000	1.75301e-06
SPAC630.08c	Glu	1	65567000	786810000	866390000	3.38616e-05
SPAC15E1.04	Glu	1	26174000	680520000	1221200000	1.35174e-05
SPBC776.02c	Glu	1	83562000	1420600000	1983800000	4.3155e-05
SPCC70.02c	Glu	1	234020000	936080000	920770000	0.000120858
SPBC12C2.08	Glu	1	13225000	542210000	1844200000	6.82995e-06
SPAC17G8.04c	Glu	1	225830000	2032500000	2349600000	0.000116628
SPCC1620.08	Glu	1	40146000	1244500000	1886900000	2.07331e-05
SPBC16G5.01	Glu	1	106230000	1593400000	2061800000	5.48617e-05
SPBC4B4.04	Glu	1	69897000	2096900000	3105600000	3.60978e-05
SPBC14C8.06	Glu	1	98007000	1960100000	1753600000	5.0615e-05
SPBC12C2.05c	Glu	1	12534000	438690000	1542300000	6.47309e-06
SPAC17H9.11	Glu	1	202750000	1622000000	2089300000	0.000104709
SPBC19G7.03c;SPAC19B12.04	Glu	1	2770900000	5541800000	8736900000	0.00143101
SPAC1F5.03c	Glu	1	48408000	919750000	1787000000	2.5e-05
SPAC20G4.01	Glu	1	37188000	632200000	966420000	1.92055e-05
SPBC4C3.05c	Glu	1	20053000	1824900000	2988600000	1.03562e-05
SPCPB1C11.01	Glu	1	45048000	360390000	591420000	2.32647e-05
SPAC16E8.15	Glu	1	123160000	1108400000	1645300000	6.36051e-05
SPBC21D10.11c	Glu	1	44393000	1198600000	1501400000	2.29264e-05
SPCC4B3.06c	Glu	1	19720000	216920000	572690000	1.01842e-05
SPBC646.04	Glu	1	34592000	1107000000	1612100000	1.78648e-05
SPBC776.11	Glu	1	263160000	2368400000	4646300000	0.000135907
SPAC30C2.08	Glu	1	60788000	1702100000	3113200000	3.13935e-05
SPAC26F1.14c	Glu	1	26190000	1047600000	1255500000	1.35256e-05
SPCC1682.05c	Glu	1	36657000	1283000000	1683500000	1.89312e-05
SPAC1F3.06c	Glu	1	13807000	1587800000	1866700000	7.13052e-06
SPCC794.11c	Glu	1	58304000	991170000	1443300000	3.01107e-05
SPCC1795.05c	Glu	1	176670000	1590000000	1878200000	9.12399e-05
SPCC162.03	Glu	1	59274000	1007700000	1185000000	3.06116e-05
SPAC6G9.03c	Glu	1	3394700	64500000	2116100000	1.75317e-06
SPAC607.03c	Glu	1	296210000	1481100000	1884500000	0.000152975
SPAC890.06	Glu	1	21268000	1318600000	1838100000	1.09837e-05
SPCC31H12.03c	Glu	1	58713000	528420000	852980000	3.03219e-05
SPAC1705.03c	Glu	1	297670000	2083700000	2985000000	0.000153729
SPAC1142.07c	Glu	1	47255000	519810000	601320000	2.44045e-05
SPBC16E9.16c	Glu	1	4768000	214560000	185380000	2.4624e-06
SPBC29A10.01	Glu	1	40375000	1413100000	1632500000	2.08514e-05
SPBC1347.02	Glu	1	118520000	1777800000	2229200000	6.12088e-05
SPCC1393.13	Glu	1	37545000	901090000	1453000000	1.93898e-05
SPBC16H5.11c	Glu	1	21280000	766070000	1165300000	1.09899e-05
SPAC57A10.09c	Glu	1	231600000	926390000	1538500000	0.000119608
SPAC1805.06c	Glu	1	120160000	1922500000	1996000000	6.20557e-05
SPACUNK4.15	Glu	1	45090000	405810000	658710000	2.32864e-05
SPBC1271.02	Glu	1	32940000	988200000	1356000000	1.70116e-05
SPCC1840.03	Glu	1	34830000	1602200000	2503700000	1.79877e-05
SPBC24C6.05	Glu	1	124260000	1615400000	2895400000	6.41732e-05
SPAC1F3.05	Glu	1	41801000	794220000	1121000000	2.15878e-05
SPBC28F2.12	Glu	1	12558000	904160000	1425500000	6.48549e-06
SPBC215.10	Glu	1	51356000	770340000	1004200000	2.65224e-05
SPBC409.20c	Glu	1	268950000	1613700000	1617200000	0.000138897
SPAC23A1.14c	Glu	1	57108000	799510000	1142000000	2.9493e-05
SPBC15D4.09c	Glu	1	36999000	998960000	1724100000	1.91079e-05
SPBC1215.02c	Glu	1	25459000	1145600000	1552300000	1.31481e-05
SPBC106.05c	Glu	1	109910000	879290000	1062500000	5.67622e-05
SPCC1739.12	Glu	1	65222000	1174000000	1307500000	3.36834e-05
SPCC338.07c	Glu	1	43234000	1686100000	2843600000	2.23279e-05
SPAC1F7.07c	Glu	1	12974000	181640000	316850000	6.70033e-06
SPBC3D6.15;SPAC694.05c	Glu	1	1306700000	3920000000	6017200000	0.000674836
SPAC806.03c	Glu	1	642490000	2569900000	3653800000	0.000331809
SPAC1805.05	Glu	1	30772000	800070000	1560800000	1.5892e-05
SPCPB16A4.05c	Glu	1	76176000	990290000	1247600000	3.93405e-05
SPCC74.03c	Glu	1	24338000	803150000	1056500000	1.25692e-05
SPAC9.07c	Glu	1	57643000	1441100000	2384300000	2.97693e-05
SPBC19C7.10	Glu	1	20366000	529500000	838220000	1.05179e-05
SPAC1B2.03c	Glu	1	140300000	1683600000	2468100000	7.24569e-05
SPAC16E8.07c	Glu	1	38246000	1223900000	1909900000	1.97519e-05
SPBC365.12c	Glu	1	3822200	145240000	426250000	1.97395e-06
SPBC30D10.17c	Glu	1	68370000	1025600000	1693000000	3.53092e-05
SPBC776.07	Glu	1	54400000	707200000	1213400000	2.80945e-05
SPAC6G9.12	Glu	1	42537000	1276100000	2086300000	2.19679e-05
SPBC19G7.17	Glu	1	46038000	690570000	898500000	2.3776e-05
SPAC144.02	Glu	1	48661000	632590000	977890000	2.51306e-05
SPAC227.07c	Glu	1	29479000	678010000	876210000	1.52242e-05
SPCC830.10	Glu	1	67861000	814330000	735890000	3.50463e-05
SPCC663.15c	Glu	1	19000000	703000000	1156300000	9.81241e-06
SPBC13E7.04	Glu	1	270830000	2979100000	3839900000	0.000139868
SPBC800.10c	Glu	1	40636000	1828600000	2871400000	2.09862e-05
SPBC29A3.10c	Glu	1	157490000	1259900000	2136500000	8.13345e-05
SPCC830.08c	Glu	1	125110000	750660000	1069600000	6.46121e-05
SPCC338.05c	Glu	1	161520000	969090000	1169000000	8.34158e-05
SPCC965.03	Glu	1	45523000	637320000	904260000	2.351e-05
SPBC1271.14	Glu	1	49194000	934680000	1755500000	2.54059e-05
SPCC830.07c	Glu	1	102910000	1852300000	3344600000	5.31471e-05
SPAC17C9.12	Glu	1	99348000	1390900000	1855600000	5.13075e-05
SPBC16C6.02c	Glu	1	3346700	478580000	838300000	1.72838e-06
SPAC26A3.15c	Glu	1	44374000	1420000000	2259600000	2.29166e-05
SPCC191.07	Glu	1	331180000	2318200000	3003400000	0.000171035
SPAC4G9.13c	Glu	1	14907000	283230000	549390000	7.69861e-06
SPBC887.04c	Glu	1	37496000	1012400000	1488100000	1.93645e-05
SPBC1685.02c	Glu	1	500410000	2502100000	1152500000	0.000258433
SPBC215.01	Glu	1	18597000	799660000	730610000	9.60428e-06
SPBC56F2.04	Glu	1	3804300	467920000	867770000	1.9647e-06
SPBC21C3.09c	Glu	1	62992000	692910000	851570000	3.25318e-05
SPCC584.11c	Glu	1	62395000	1185500000	2069100000	3.22234e-05
SPBC16H5.10c	Glu	1	25834000	1059200000	1720700000	1.33418e-05
SPAC17A2.02c	Glu	1	69097000	760070000	1272200000	3.56846e-05
SPAC22H12.01c	Glu	1	36335000	581360000	1052300000	1.87649e-05
SPAC4F8.12c	Glu	1	5989300	760640000	1293600000	3.09313e-06
SPAC12B10.02c	Glu	1	41024000	492280000	824730000	2.11865e-05
SPBC16E9.09c	Glu	1	103830000	1349800000	2054500000	5.36222e-05
SPAC3G6.05	Glu	1	72213000	577700000	810670000	3.72939e-05
SPAC20G8.07c	Glu	1	133160000	798930000	1037000000	6.87695e-05
SPBC6B1.08c	Glu	1	63331000	1646600000	1749300000	3.27068e-05
SPAC17C9.10	Glu	1	59824000	299120000	442380000	3.08957e-05
SPAC24H6.13	Glu	1	24294000	777390000	1348800000	1.25465e-05
SPCC1020.10	Glu	1	2270800	68123000	1213000000	1.17274e-06
SPCC320.13c	Glu	1	1342100	25500000	1491500000	6.93118e-07
SPAC824.07	Glu	1	141760000	1701100000	1517900000	7.32109e-05
SPBC800.04c	Glu	1	754810000	3019200000	5235600000	0.000389816
SPBC27B12.08	Glu	1	3772800	373500000	624780000	1.94843e-06
SPBC2A9.09	Glu	1	53248000	638970000	928070000	2.74995e-05
SPAC17C9.09c	Glu	1	162330000	811660000	1023900000	8.38341e-05
SPAC1F7.08	Glu	1	26611000	345940000	498900000	1.37431e-05
SPBC1271.07c	Glu	1	51865000	466780000	590030000	2.67853e-05
SPAC4C5.01	Glu	1	39527000	474330000	728700000	2.04134e-05
SPBC29A3.01	Glu	1	19664000	609580000	1221900000	1.01553e-05
SPAC19G12.03	Glu	1	46548000	930960000	1134200000	2.40394e-05
SPAC1851.02	Glu	1	60157000	842190000	1449900000	3.10676e-05
SPAC9E9.07c	Glu	1	68200000	886600000	1150400000	3.52214e-05
SPBC1271.04c	Glu	1	62251000	1307300000	1890900000	3.21491e-05
SPBC405.04c	Glu	1	70751000	990520000	1514300000	3.65388e-05
SPBC119.03	Glu	1	59670000	1074100000	1617300000	3.08161e-05
SPBC14F5.13c	Glu	1	9616800	240420000	622360000	4.96653e-06
SPAC18G6.07c	Glu	1	45566000	911310000	1130500000	2.35322e-05
SPAPB17E12.11	Glu	1	90226000	1353400000	1829100000	4.65966e-05
SPAC1F7.02c	Glu	1	27835000	918570000	1705900000	1.43752e-05
SPCC576.11	Glu	1	67282000	740100000	1027000000	3.47473e-05
SPBC1604.08c	Glu	1	89556000	1701600000	1995800000	4.62505e-05
SPBC543.09	Glu	1	24943000	947820000	1462000000	1.28816e-05
SPCC1494.05c	Glu	1	15353000	752300000	1089100000	7.92894e-06
SPBC16H5.07c	Glu	1	52874000	898850000	898150000	2.73064e-05
SPBC1685.14c	Glu	1	11696000	350880000	844200000	6.04031e-06
SPAC23C4.08	Glu	1	63374000	823860000	741670000	3.2729e-05
SPAC24B11.06c	Glu	1	78620000	1257900000	2230000000	4.06027e-05
SPACUNK4.17	Glu	1	4193000	109020000	217020000	2.16544e-06
SPBC27.01c	Glu	1	82164000	410820000	725040000	4.2433e-05
SPBC13G1.11	Glu	1	41185000	576590000	972030000	2.12697e-05
SPBC16H5.13	Glu	1	13330000	519870000	691800000	6.88418e-06
SPBC9B6.11c	Glu	1	25536000	715000000	924240000	1.31879e-05
SPAC17H9.13c	Glu	1	36363000	727270000	1066300000	1.87794e-05
SPBC2D10.05	Glu	1	17236000	396430000	418990000	8.9014e-06
SPCC794.03	Glu	1	33704000	707780000	929700000	1.74062e-05
SPBC14C8.02	Glu	1	58031000	1508800000	2079800000	2.99697e-05
SPAC167.05	Glu	1	8008400	248260000	1328400000	4.13588e-06
SPCC553.06	Glu	1	107470000	1074700000	1409500000	5.55021e-05
SPBC1773.17c	Glu	1	10861000	195490000	349570000	5.60908e-06
SPAC17G6.15c	Glu	1	38669000	696040000	1247100000	1.99703e-05
SPBC1289.07c	Glu	1	57977000	985610000	1736400000	2.99418e-05
SPAC13A11.01c	Glu	1	20495000	901780000	943680000	1.05845e-05
SPCC16A11.02	Glu	1	18548000	704820000	1080300000	9.57898e-06
SPAC30.01c	Glu	1	9305300	790950000	1031700000	4.80565e-06
SPAC343.09	Glu	1	80925000	1537600000	1775000000	4.17931e-05
SPBC354.02c	Glu	1	66784000	734620000	999300000	3.44901e-05
SPBC21D10.09c	Glu	1	5187700	409830000	695540000	2.67915e-06
SPAC17H9.12c	Glu	1	120690000	1810300000	3498200000	6.23295e-05
SPBC32H8.03	Glu	1	55112000	936900000	1936700000	2.84622e-05
SPAC644.13c	Glu	1	66758000	667580000	836680000	3.44767e-05
SPBC83.16c	Glu	1	19331000	483260000	575270000	9.98335e-06
SPBC609.05	Glu	1	44121000	1147100000	2041700000	2.2786e-05
SPAC4G9.11c	Glu	1	70577000	705770000	1111900000	3.6449e-05
SPAC4D7.09	Glu	1	70355000	1688500000	1821500000	3.63343e-05
SPAC6G10.07	Glu	1	18770000	788340000	1434300000	9.69363e-06
SPBC21B10.04c	Glu	1	167720000	1006300000	2154000000	8.66178e-05
SPBC1198.04c	Glu	1	5514700	215070000	308090000	2.84803e-06
SPBP23A10.07	Glu	1	18756000	994070000	1103800000	9.6864e-06
SPAC56F8.10	Glu	1	24987000	799600000	1688900000	1.29044e-05
SPBC337.10c	Glu	1	42298000	676770000	1180900000	2.18445e-05
SPCC18B5.07c	Glu	1	30649000	980780000	1077900000	1.58284e-05
SPAC25H1.10c	Glu	1	74538000	298150000	820010000	3.84946e-05
SPBC8D2.02c	Glu	1	70176000	421060000	832210000	3.62419e-05
SPBC19G7.10c	Glu	1	26913000	915060000	2364500000	1.3899e-05
SPAC1565.01	Glu	1	74588000	969650000	1510800000	3.85204e-05
SPAC1B3.14	Glu	1	176790000	883930000	1451700000	9.13019e-05
SPAC22E12.10c	Glu	1	26202000	681240000	802280000	1.35318e-05
SPBP23A10.16	Glu	1	98492000	689440000	1603000000	5.08655e-05
SPCC777.13	Glu	1	13471000	525360000	1028100000	6.957e-06
SPAC959.07	Glu	1	59034000	885510000	899270000	3.04877e-05
SPBC1734.04	Glu	1	41526000	872050000	1226400000	2.14458e-05
SPBP23A10.08	Glu	1	25970000	701200000	996160000	1.3412e-05
SPAC17A5.14	Glu	1	13299000	917660000	1397000000	6.86817e-06
SPAC14C4.04	Glu	1	83571000	1170000000	1819000000	4.31596e-05
SPBC16E9.02c	Glu	1	37824000	983430000	1559700000	1.95339e-05
SPBC26H8.06	Glu	1	90365000	994020000	1148800000	4.66683e-05
SPBC1773.14	Glu	1	7726200	185430000	351550000	3.99014e-06
SPCC1795.02c	Glu	1	63831000	510650000	496370000	3.2965e-05
SPBC776.04	Glu	1	30256000	1210200000	1626700000	1.56255e-05
SPBC337.09	Glu	1	154980000	929900000	1061600000	8.00383e-05
SPBC1289.05c	Glu	1	286430000	1432200000	2013900000	0.000147925
SPCC965.12	Glu	1	660330	15848000	59924000	3.41023e-07
SPBC21C3.14c	Glu	1	17068000	733920000	1536200000	8.81464e-06
SPBPB2B2.06c	Glu	1	6473400	135940000	500980000	3.34314e-06
SPBC4F6.16c	Glu	1	26752000	615290000	923130000	1.38159e-05
SPAC1002.03c	Glu	1	23217000	975110000	845980000	1.19902e-05
SPCC4B3.05c	Glu	1	43217000	648250000	927210000	2.23191e-05
SPBC19F5.05c	Glu	1	37549000	976270000	1546900000	1.93919e-05
SPAC4F10.11	Glu	1	31532000	725230000	675520000	1.62845e-05
SPAC1782.06c	Glu	1	65940000	1121000000	1286300000	3.40542e-05
SPBC23G7.10c	Glu	1	2986600	68692000	119600000	1.54241e-06
SPAC26F1.04c	Glu	1	18985000	379710000	494050000	9.80466e-06
SPAC15E1.05c	Glu	1	15590000	342980000	972520000	8.05134e-06
SPAC22A12.10	Glu	1	48079000	480790000	504820000	2.483e-05
SPCC576.14	Glu	1	45422000	681330000	2017200000	2.34579e-05
SPBC216.03	Glu	1	39147000	665500000	832700000	2.02172e-05
SPBC11C11.02	Glu	1	19949000	738120000	713830000	1.03025e-05
SPAC8F11.10c	Glu	1	27826000	528700000	538180000	1.43705e-05
SPAC23G3.12c	Glu	1	22756000	1251600000	1585400000	1.17522e-05
SPCC962.03c	Glu	1	31024000	620480000	615570000	1.60221e-05
SPAC16E8.17c	Glu	1	65833000	1053300000	1917400000	3.3999e-05
SPAC19D5.04	Glu	1	5034200	760160000	896240000	2.59988e-06
SPBC1718.04	Glu	1	13159000	368450000	520050000	6.79587e-06
SPAC1250.05	Glu	1	337190000	2023100000	2284600000	0.000174139
SPBC3E7.07c	Glu	1	149570000	1196600000	1663300000	7.72443e-05
SPAC4A8.12c	Glu	1	45553000	774410000	1437500000	2.35255e-05
SPCC4G3.04c	Glu	1	77928000	1558600000	2197700000	4.02453e-05
SPAC4D7.01c	Glu	1	13930000	1309400000	978880000	7.19405e-06
SPBC30B4.05	Glu	1	15498000	712910000	1188500000	8.00383e-06
SPCC14G10.04	Glu	1	40411000	1010300000	976850000	2.087e-05
SPBC3D6.12	Glu	1	8927400	491010000	682160000	4.61049e-06
SPBC29A10.04	Glu	1	2664200	175840000	123270000	1.37591e-06
SPAC23D3.12	Glu	1	15745000	314900000	778880000	8.13139e-06
SPBC3H7.01	Glu	1	46858000	796580000	1666800000	2.41995e-05
SPBC26H8.10	Glu	1	15499000	790440000	805660000	8.00434e-06
SPBC17A3.05c	Glu	1	25144000	502880000	1134100000	1.29854e-05
SPCC645.04	Glu	1	3554300	56870000	1179700000	1.83559e-06
SPBC11B10.01	Glu	1	16103000	418670000	952570000	8.31628e-06
SPAC27F1.06c	Glu	1	43231000	691690000	924260000	2.23263e-05
SPAC6G9.07c	Glu	1	169800000	1867800000	2033100000	8.7692e-05
SPAC1782.10c	Glu	1	148530000	742630000	1392300000	7.67072e-05
SPCC306.02c	Glu	1	85270000	767430000	1160100000	4.40371e-05
SPBC23G7.05	Glu	1	390830000	1954100000	1748400000	0.000201841
SPCC285.17	Glu	1	34047000	544750000	1034300000	1.75833e-05
SPCC18.15	Glu	1	30742000	645580000	1339300000	1.58765e-05
SPCC1919.09	Glu	1	243420000	1947400000	4142700000	0.000125712
SPBC354.01	Glu	1	41545000	1038600000	2031600000	2.14556e-05
SPCC1322.08	Glu	1	8583200	248910000	367330000	4.43273e-06
SPAC15A10.16	Glu	1	8970000	654810000	905200000	4.63249e-06
SPBC23E6.01c	Glu	1	27909000	474460000	603870000	1.44134e-05
SPAPB8E5.03	Glu	1	28863000	461800000	813500000	1.49061e-05
SPBC31E1.02c	Glu	1	25678000	1027100000	1260300000	1.32612e-05
SPCC290.03c	Glu	1	6601900	495150000	852990000	3.4095e-06
SPAC4F8.03	Glu	1	53145000	850320000	882360000	2.74463e-05
SPCC1235.15	Glu	1	24767000	396280000	539670000	1.27907e-05
SPCC1322.09	Glu	1	28297000	537650000	748320000	1.46138e-05
SPAPB8E5.07c	Glu	1	13004000	676220000	955890000	6.71582e-06
SPBC800.09	Glu	1	60815000	1033900000	1186700000	3.14075e-05
SPAC23C4.09c	Glu	1	92209000	645470000	926570000	4.76207e-05
SPAC926.08c	Glu	1	45661000	730580000	981120000	2.35813e-05
SPBC32F12.12c	Glu	1	85605000	428030000	663440000	4.42101e-05
SPAC30C2.02	Glu	1	55889000	1006000000	1488000000	2.88635e-05
SPBC13A2.04c	Glu	1	1463800	29275000	96566000	7.55969e-07
SPAC1F3.09	Glu	1	29838000	805630000	1007200000	1.54096e-05
SPAC19B12.01	Glu	1	14614000	701450000	869000000	7.54729e-06
SPBC16E9.10c	Glu	1	4572800	196630000	1190300000	2.36159e-06
SPAC6C3.08	Glu	1	62836000	816860000	1290900000	3.24512e-05
SPCC1682.14	Glu	1	98929000	791430000	915110000	5.10912e-05
SPAC22F8.09	Glu	1	8198600	147580000	1300800000	4.23411e-06
SPCC1672.12c	Glu	1	77361000	1315100000	918860000	3.99525e-05
SPAC4A8.14	Glu	1	61971000	991540000	1707800000	3.20045e-05
SPBC3E7.14	Glu	1	75173000	375860000	638640000	3.88225e-05
SPBC3E7.10	Glu	1	45711000	959920000	904900000	2.36071e-05
SPCC594.02c	Glu	1	39462000	749780000	1258800000	2.03799e-05
SPAC2F3.06c	Glu	1	29105000	902260000	1155400000	1.50311e-05
SPBC8D2.10c	Glu	1	38535000	847770000	1140000000	1.99011e-05
SPBC409.05	Glu	1	82534000	825340000	1466800000	4.26241e-05
SPBC1773.02c	Glu	1	31250000	312500000	405100000	1.61388e-05
SPAC5D6.13	Glu	1	29909000	448630000	863510000	1.54463e-05
SPAC1687.15	Glu	1	36438000	692330000	987610000	1.88181e-05
SPBC36.07	Glu	1	17872000	1054400000	1672400000	9.22986e-06
SPAC16E8.01	Glu	1	16900000	777390000	1467300000	8.72788e-06
SPAP11E10.01	Glu	1	47576000	761210000	840010000	2.45703e-05
SPCC1259.02c	Glu	1	30102000	752560000	1295400000	1.5546e-05
SPAC328.06	Glu	1	14035000	814030000	843300000	7.24827e-06
SPAC17G6.09	Glu	1	39236000	627780000	956180000	2.02631e-05
SPBC577.06c	Glu	1	5412300	541230000	692940000	2.79514e-06
SPAC1F5.11c	Glu	1	883100	173970000	311210000	4.5607e-07
SPCC737.08	Glu	1	5720400	1372900000	1077700000	2.95426e-06
SPAC27D7.07c	Glu	1	98637000	394550000	969600000	5.09403e-05
SPAC23A1.15c	Glu	1	5484300	54843000	461960000	2.83233e-06
SPCP1E11.05c	Glu	1	24307000	486140000	712550000	1.25532e-05
SPBC11B10.09	Glu	1	41634000	707770000	723520000	2.15016e-05
SPAC17H9.09c	Glu	1	43575000	566480000	781980000	2.2504e-05
SPCC4G3.14	Glu	1	16769000	452760000	430410000	8.66023e-06
SPAPB2B4.07	Glu	1	26898000	295880000	559680000	1.38913e-05
SPBC409.13	Glu	1	81353000	732180000	1151300000	4.20142e-05
SPCC553.02	Glu	1	26450000	767050000	1124600000	1.36599e-05
SPAC732.02c	Glu	1	18055000	451380000	640740000	9.32437e-06
SPAC16C9.03	Glu	1	31624000	727360000	1036100000	1.6332e-05
SPCC188.06c	Glu	1	38829000	1048400000	1245600000	2.0053e-05
SPAC2C4.03c	Glu	1	105700000	634220000	1080500000	5.4588e-05
SPACUNK4.12c	Glu	1	19447000	1069600000	590810000	1.00433e-05
SPCC1682.02c	Glu	1	19986000	939360000	1446700000	1.03216e-05
SPAP7G5.06	Glu	1	6687800	107000000	217540000	3.45386e-06
SPBC4F6.13c	Glu	1	11527000	403460000	560540000	5.95303e-06
SPBC660.13c	Glu	1	22925000	687740000	654630000	1.18394e-05
SPBC30D10.02	Glu	1	100940000	908460000	891680000	5.21297e-05
SPAC13C5.04	Glu	1	35256000	387820000	448500000	1.82077e-05
SPAC3H5.10	Glu	1	150690000	1205500000	1990900000	7.78227e-05
SPCC31H12.05c	Glu	1	24659000	468520000	767090000	1.2735e-05
SPAC4H3.09	Glu	1	343130000	686270000	1118200000	0.000177207
SPAC27D7.06	Glu	1	56739000	964560000	1670600000	2.93024e-05
SPAC1F7.11c	Glu	1	8761900	271620000	459840000	4.52502e-06
SPAC8C9.03	Glu	1	28264000	537020000	664810000	1.45967e-05
SPAC25A8.01c	Glu	1	20353000	936260000	1045900000	1.05112e-05
SPMIT.05	Glu	1	78725000	472350000	568950000	4.06569e-05
SPBC2F12.05c	Glu	1	7149400	571950000	621410000	3.69225e-06
SPAC11G7.02	Glu	1	14090000	549510000	867680000	7.27668e-06
SPAC13G6.03	Glu	1	22734000	704750000	805500000	1.17408e-05
SPBC83.01	Glu	1	25750000	823990000	1024600000	1.32984e-05
SPBC530.03c	Glu	1	102090000	1225100000	497070000	5.27236e-05
SPAC323.07c	Glu	1	16531000	165310000	316290000	8.53731e-06
SPAC343.14c	Glu	1	44438000	1066500000	1278100000	2.29497e-05
SPAC16E8.04c	Glu	1	44737000	581580000	1016700000	2.31041e-05
SPAC11E3.13c	Glu	1	69023000	897300000	1726700000	3.56464e-05
SPAC17C9.08	Glu	1	29888000	597760000	1005900000	1.54354e-05
SPBC557.03c	Glu	1	33373000	867690000	1250200000	1.72352e-05
SPAC17G6.10	Glu	1	17658000	600370000	1394200000	9.11934e-06
SPBC11B10.04c	Glu	1	7868900	118030000	540470000	4.06384e-06
SPAC4F10.13c	Glu	1	31224000	1436300000	2217200000	1.61254e-05
SPBC3B8.04c	Glu	1	14463000	448340000	607200000	7.46931e-06
SPAC222.09	Glu	1	38983000	818650000	1148500000	2.01325e-05
SPAPJ760.02c	Glu	1	20347000	813870000	1049000000	1.05081e-05
SPAC6F12.16c	Glu	1	6458900	400450000	486930000	3.33565e-06
SPBC119.17	Glu	1	26365000	1265500000	1593400000	1.3616e-05
SPBC17G9.08c	Glu	1	9164000	439870000	586190000	4.73268e-06
SPBC8D2.12c	Glu	1	32155000	418020000	466490000	1.66062e-05
SPBC16G5.08	Glu	1	60585000	848180000	1609700000	3.12887e-05
SPAC323.04	Glu	1	30608000	795810000	1241800000	1.58073e-05
SPAC4G9.20c	Glu	1	6104900	97678000	278850000	3.15283e-06
SPAC13G7.01c	Glu	1	19414000	563010000	468640000	1.00262e-05
SPBC2F12.03c	Glu	1	1784400	73160000	517230000	9.2154e-07
SPBC56F2.11	Glu	1	17599000	404780000	593200000	9.08887e-06
SPBC337.16	Glu	1	23749000	261240000	723780000	1.2265e-05
SPAC3H8.02	Glu	1	17723000	460790000	862270000	9.15291e-06
SPBC800.06	Glu	1	49333000	789320000	1075400000	2.54777e-05
SPBC3F6.04c	Glu	1	3287500	111780000	554190000	1.69781e-06
SPBC146.12	Glu	1	18438000	479400000	713700000	9.52217e-06
SPAC824.08	Glu	1	18231000	455780000	986740000	9.41527e-06
SPAC6F12.06	Glu	1	104160000	833260000	1323300000	5.37927e-05
SPAC1687.01	Glu	1	116990000	935900000	993720000	6.04186e-05
SPCPJ732.01	Glu	1	11041000	309160000	518070000	5.70204e-06
SPBC1709.18	Glu	1	47639000	666940000	1461200000	2.46028e-05
SPCC663.06c	Glu	1	8237600	123560000	334240000	4.25425e-06
SPBC660.15	Glu	1	31319000	626370000	1024800000	1.61745e-05
SPBC19G7.15	Glu	1	28891000	577820000	918850000	1.49205e-05
SPAC821.06	Glu	1	30550000	611010000	536720000	1.57773e-05
SPAC1952.08c	Glu	1	64900000	454300000	427370000	3.35171e-05
SPAPB24D3.06c	Glu	1	24901000	398420000	806050000	1.28599e-05
SPAC589.12	Glu	1	19078000	572340000	670590000	9.85269e-06
SPAC630.14c	Glu	1	26135000	888580000	1583800000	1.34972e-05
SPBC16A3.05c	Glu	1	80098000	1441800000	2128600000	4.1366e-05
SPBC29A10.07	Glu	1	8281600	521740000	886150000	4.27697e-06
SPBC725.05c	Glu	1	13016000	234290000	709800000	6.72202e-06
SPBC13G1.09	Glu	1	22248000	645180000	937800000	1.14898e-05
SPBC409.21	Glu	1	59980000	599800000	965880000	3.09762e-05
SPCC16C4.09	Glu	1	10355000	497020000	676100000	5.34776e-06
SPCC1494.04c	Glu	1	14056000	365450000	715500000	7.25912e-06
SPAC3H8.07c	Glu	1	60558000	787260000	1214400000	3.12747e-05
SPBC2G2.08	Glu	1	18651000	969870000	1715600000	9.63217e-06
SPAC4A8.02c	Glu	1	22782000	182260000	632170000	1.17656e-05
SPCC11E10.07c	Glu	1	27763000	471970000	925450000	1.4338e-05
SPCC1322.16	Glu	1	81124000	1216900000	2259300000	4.18959e-05
SPBC1A4.09	Glu	1	10514000	441570000	500040000	5.42988e-06
SPBC20F10.05	Glu	1	2960800	139160000	814650000	1.52908e-06
SPBP16F5.05c	Glu	1	44539000	445390000	713880000	2.30018e-05
SPBC56F2.15	Glu	1	305730000	1528600000	1863700000	0.000157892
SPAC1486.06	Glu	1	50128000	1203100000	2000000000	2.58882e-05
SPAPB2B4.02	Glu	1	131020000	1310200000	1423000000	6.76643e-05
SPBC115.03	Glu	1	27261000	599740000	430020000	1.40787e-05
SPBC800.12c	Glu	1	121030000	847210000	1626700000	6.2505e-05
SPCC330.08	Glu	1	19203000	518490000	841020000	9.91725e-06
SPAC23C4.05c	Glu	1	10791000	248190000	421310000	5.57293e-06
SPBC1306.01c	Glu	1	43861000	1491300000	1223800000	2.26517e-05
SPAC8C9.15c	Glu	1	25426000	813620000	937070000	1.31311e-05
SPAC4G9.15	Glu	1	20768000	394600000	1627300000	1.07255e-05
SPBC21B10.03c	Glu	1	26725000	775020000	1076300000	1.38019e-05
SPAC15A10.01	Glu	1	5077100	192930000	673680000	2.62203e-06
SPBC21C3.12c	Glu	1	75801000	682210000	1380800000	3.91469e-05
SPBC216.07c	Glu	1	3234300	388120000	450450000	1.67033e-06
SPAC1565.05	Glu	1	15594000	592560000	738780000	8.05341e-06
SPBC215.12	Glu	1	10321000	588300000	608640000	5.3302e-06
SPAC29A4.18	Glu	1	42220000	759950000	1156800000	2.18042e-05
SPAC3A11.10c	Glu	1	43820000	876400000	858520000	2.26305e-05
SPAC1002.12c	Glu	1	17382000	538830000	731610000	8.97681e-06
SPBC651.02	Glu	1	36287000	544310000	632070000	1.87402e-05
SPCC645.05c	Glu	1	4623200	406840000	470460000	2.38762e-06
SPBC4B4.08	Glu	1	31079000	528340000	917760000	1.60505e-05
SPAC1486.08	Glu	1	140970000	704840000	505680000	7.28029e-05
SPBP4H10.17c	Glu	1	19052000	323880000	606100000	9.83926e-06
SPAC1002.19	Glu	1	5083300	152500000	185780000	2.62523e-06
SPCC330.12c	Glu	1	43143000	302000000	547080000	2.22809e-05
SPAC4H3.01	Glu	1	30504000	732100000	886880000	1.57536e-05
SPBC27B12.03c	Glu	1	66238000	794860000	1259600000	3.42081e-05
SPAC227.13c	Glu	1	24416000	293000000	428920000	1.26095e-05
SPBC577.08c	Glu	1	61784000	988550000	2415200000	3.19079e-05
SPBC4F6.06	Glu	1	6091800	274130000	471020000	3.14607e-06
SPCC1739.09c	Glu	1	98930000	791440000	1420300000	5.10917e-05
SPBC16C6.09	Glu	1	17118000	547790000	560370000	8.84046e-06
SPAC9.10	Glu	1	44270000	664050000	689970000	2.28629e-05
SPBP4H10.20	Glu	1	35018000	560290000	559680000	1.80848e-05
SPAC644.08	Glu	1	49760000	746400000	1165700000	2.56982e-05
SPCC622.14	Glu	1	33096000	595730000	689600000	1.70922e-05
SPAC22E12.04	Glu	1	42952000	1030900000	1797500000	2.21822e-05
SPBP8B7.26	Glu	1	28936000	347230000	453040000	1.49438e-05
SPBP35G2.12	Glu	1	68815000	756970000	1208100000	3.5539e-05
SPAC139.01c	Glu	1	22798000	911920000	1173000000	1.17739e-05
SPCC1827.02c	Glu	1	30285000	545120000	510450000	1.56405e-05
SPAC17C9.11c	Glu	1	20231000	323690000	814590000	1.04482e-05
SPBC428.14	Glu	1	25406000	406500000	565340000	1.31207e-05
SPBC1826.01c	Glu	1	4695800	469580000	460580000	2.42511e-06
SPBC1711.12	Glu	1	15830000	522390000	512860000	8.17529e-06
SPBC2D10.09	Glu	1	21164000	529090000	744490000	1.093e-05
SPBC3E7.02c	Glu	1	56276000	450210000	428120000	2.90633e-05
SPCP31B10.06	Glu	1	933600	56016000	121110000	4.82151e-07
SPAC19B12.03	Glu	1	6356300	489440000	955870000	3.28266e-06
SPAC15A10.08	Glu	1	12255000	392170000	630560000	6.329e-06
SPAC11E3.04c	Glu	1	78041000	702370000	1678500000	4.03037e-05
SPAC227.10	Glu	1	35190000	316710000	620540000	1.81736e-05
SPAC25B8.09	Glu	1	23466000	328530000	252720000	1.21188e-05
SPAC10F6.17c	Glu	1	28414000	625110000	720560000	1.46742e-05
SPAC12B10.16c	Glu	1	25208000	630200000	801700000	1.30185e-05
SPAC5H10.08c	Glu	1	36774000	588390000	1036100000	1.89917e-05
SPAC23H4.01c	Glu	1	7712700	401060000	842840000	3.98317e-06
SPCC777.06c	Glu	1	47074000	847340000	2123800000	2.4311e-05
SPAC21E11.06	Glu	1	29884000	657460000	1080300000	1.54334e-05
SPBC4B4.09	Glu	1	13103000	550340000	616070000	6.76695e-06
SPAC4F10.10c	Glu	1	71827000	1077400000	1619200000	3.70945e-05
SPCC70.05c	Glu	1	5870700	228960000	297140000	3.03188e-06
SPCC4B3.03c	Glu	1	12716000	330620000	490540000	6.56708e-06
SPAC13D6.05	Glu	1	23511000	329160000	562760000	1.21421e-05
SPBC1105.07c	Glu	1	2009800	50245000	102420000	1.03795e-06
SPCC1919.03c	Glu	1	30560000	397280000	486590000	1.57825e-05
SPAC12G12.06c	Glu	1	30013000	660290000	1276600000	1.55e-05
SPBC354.15	Glu	1	8009000	176200000	285210000	4.13619e-06
SPCC825.03c	Glu	1	60732000	850240000	780510000	3.13646e-05
SPAC8C9.12c	Glu	1	51834000	570170000	252930000	2.67693e-05
SPBC1709.07	Glu	1	31214000	468200000	929730000	1.61202e-05
SPAC1486.04c	Glu	1	5384100	576100000	724630000	2.78058e-06
SPBC428.15	Glu	1	31427000	691390000	1593700000	1.62302e-05
SPBC4C3.06	Glu	1	9077000	390310000	394270000	4.68775e-06
SPBC1289.16c	Glu	1	9288300	408690000	465580000	4.79687e-06
SPCC5E4.03c	Glu	1	14275000	456810000	1041300000	7.37222e-06
SPAC56E4.06c	Glu	1	5743600	149330000	387340000	2.96624e-06
SPBC1706.03	Glu	1	9770700	400600000	461020000	5.04601e-06
SPBC902.04	Glu	1	9721400	233310000	454520000	5.02055e-06
SPAC1782.07	Glu	1	79163000	554140000	939130000	4.08831e-05
SPAC13G6.10c	Glu	1	240330000	721000000	581800000	0.000124117
SPAC19B12.06c	Glu	1	39141000	195710000	364290000	2.02141e-05
SPBC20F10.01	Glu	1	50330000	352310000	913540000	2.59926e-05
SPAC26A3.17c	Glu	1	32511000	585210000	519050000	1.67901e-05
SPAC24B11.12c	Glu	1	5650100	361610000	733700000	2.91795e-06
SPAC23C4.15	Glu	1	79239000	871630000	1174100000	4.09224e-05
SPAC23C4.19	Glu	1	12629000	681970000	833250000	6.52215e-06
SPAC27D7.11c	Glu	1	148310000	1186500000	1176200000	7.65936e-05
SPCC285.08	Glu	1	110270000	882150000	1514900000	5.69481e-05
SPCC757.12	Glu	1	17110000	205320000	380490000	8.83633e-06
SPBC26H8.02c	Glu	1	10790000	172630000	396990000	5.57242e-06
SPBC31F10.07	Glu	1	24669000	419380000	525320000	1.27401e-05
SPCC162.08c	Glu	1	4095000	446360000	613280000	2.11483e-06
SPAC57A7.08	Glu	1	18318000	403000000	483470000	9.4602e-06
SPAC23H4.12	Glu	1	9855700	226680000	355870000	5.0899e-06
SPBC691.03c	Glu	1	9058700	425760000	523800000	4.6783e-06
SPBC1198.05	Glu	1	151450000	1666000000	1993100000	7.82152e-05
SPAC343.12	Glu	1	99478000	596870000	536080000	5.13747e-05
SPAC1250.01	Glu	1	7236000	470340000	502560000	3.73698e-06
SPBC1289.04c	Glu	1	9633200	433500000	568550000	4.97499e-06
SPBC1709.19c	Glu	1	37130000	631210000	801890000	1.91755e-05
SPCC320.05	Glu	1	2856600	71415000	113980000	1.47527e-06
SPAC17G6.05c	Glu	1	10532000	463400000	613810000	5.43917e-06
SPBC3B9.18c	Glu	1	84219000	589530000	573280000	4.34943e-05
SPBC1711.03	Glu	1	24338000	292050000	311240000	1.25692e-05
SPBC13G1.06c	Glu	1	37546000	225280000	900700000	1.93904e-05
SPCC16C4.03	Glu	1	59815000	598150000	951360000	3.0891e-05
SPBC725.04	Glu	1	12503000	325070000	572460000	6.45708e-06
SPBC1734.13	Glu	1	86612000	1212600000	1856400000	4.47301e-05
SPCC830.11c	Glu	1	35650000	320850000	396150000	1.84112e-05
SPAC664.06	Glu	1	39090000	429990000	894180000	2.01877e-05
SPBC13A2.03	Glu	1	45092000	450920000	449950000	2.32874e-05
SPAC23H4.03c	Glu	1	75243000	752430000	1495900000	3.88587e-05
SPAC17A5.13	Glu	1	36557000	475240000	642770000	1.88796e-05
SPAC630.09c	Glu	1	22498000	359980000	628820000	1.16189e-05
SPAC20H4.10	Glu	1	9664500	512220000	505620000	4.99116e-06
SPBC20F10.09	Glu	1	74920000	374600000	580540000	3.86919e-05
SPBC19G7.05c	Glu	1	5599700	447980000	662090000	2.89192e-06
SPCC1450.02	Glu	1	12439000	335860000	682520000	6.42403e-06
SPAPB2C8.01	Glu	1	10122000	80979000	635720000	5.22743e-06
SPAC27D7.02c	Glu	1	7540200	384550000	342850000	3.89408e-06
SPBC776.17	Glu	1	4503700	58548000	1090500000	2.3259e-06
SPAC977.12	Glu	1	14583000	291670000	484410000	7.53128e-06
SPBC23G7.08c	Glu	1	9701100	368640000	522600000	5.01006e-06
SPBP8B7.20c	Glu	1	23932000	622240000	1195400000	1.23595e-05
SPCC1672.11c	Glu	1	6294100	314710000	433250000	3.25054e-06
SPBC839.02	Glu	1	3526900	98753000	199620000	1.82144e-06
SPCC1620.11	Glu	1	6230500	299060000	886470000	3.2177e-06
SPAC31A2.05c	Glu	1	754940	68699000	1809100000	3.89883e-07
SPCC338.06c	Glu	1	28169000	253520000	322270000	1.45477e-05
SPCC576.07	Glu	1	61835000	494680000	409360000	3.19342e-05
SPBC660.12c	Glu	1	29552000	472830000	840070000	1.52619e-05
SPAC167.06c	Glu	1	7948500	71537000	111920000	4.10494e-06
SPCC74.01	Glu	1	15295000	520050000	717970000	7.89899e-06
SPBC3B9.03	Glu	1	20204000	666730000	664050000	1.04342e-05
SPAC23D3.06c	Glu	1	6592900	448320000	714460000	3.40485e-06
SPCC188.02	Glu	1	18618000	446820000	679360000	9.61513e-06
SPAC222.03c	Glu	1	87743000	614200000	841280000	4.53142e-05
SPCC1494.07	Glu	1	3049700	240920000	659460000	1.575e-06
SPBC3H7.07c;REV__SPBC3H7.07c	Glu	1	42919000	729620000	1717600000	2.21652e-05
SPBC1709.17	Glu	1	14995000	389860000	580860000	7.74406e-06
SPBC16H5.04	Glu	1	76536000	765360000	1901600000	3.95265e-05
SPAC15A10.07	Glu	1	61036000	427250000	1316300000	3.15216e-05
SPAC31A2.02	Glu	1	31238000	281150000	610160000	1.61326e-05
SPAC2F7.11	Glu	1	13873000	291330000	613810000	7.16461e-06
SPAC1952.09c	Glu	1	35911000	897760000	1809600000	1.8546e-05
SPBC691.05c	Glu	1	13842000	373740000	973030000	7.1486e-06
SPBC1604.04	Glu	1	40505000	607580000	1150800000	2.09185e-05
SPBC839.08c	Glu	1	8759900	324110000	667500000	4.52399e-06
SPBC409.06	Glu	1	41466000	621990000	1140600000	2.14148e-05
SPAC4F10.02	Glu	1	41298000	1032500000	1960800000	2.1328e-05
SPBC713.09	Glu	1	20970000	356500000	1065900000	1.08298e-05
SPAP7G5.05	Glu	1	155010000	1395100000	1065100000	8.00538e-05
SPAC17C9.06	Glu	1	14899000	432080000	845150000	7.69448e-06
SPBC2G2.03c	Glu	1	139360000	696780000	1103700000	7.19714e-05
SPAC22H12.02	Glu	1	60641000	667050000	837880000	3.13176e-05
SPCC417.12	Glu	1	1807100	56020000	90919000	9.33263e-07
SPBC16G5.02c	Glu	1	29230000	467680000	391570000	1.50956e-05
SPAC1B3.13	Glu	1	13945000	543870000	711860000	7.20179e-06
SPAC1556.08c	Glu	1	23101000	369620000	144160000	1.19303e-05
SPAC17A2.01	Glu	1	73753000	663770000	1063900000	3.80892e-05
SPBC23E6.05	Glu	1	33249000	664990000	1320000000	1.71712e-05
SPAC8F11.04	Glu	1	25388000	507770000	1204200000	1.31114e-05
SPBC1347.05c	Glu	1	26437000	475870000	489140000	1.36532e-05
SPAC2C4.04c	Glu	1	27108000	189760000	422600000	1.39997e-05
SPCC1450.15	Glu	1	18852000	377040000	762720000	9.73598e-06
SPBC16A3.18	Glu	1	64181000	2182100000	634630000	3.31458e-05
SPAC6F6.05	Glu	1	114310000	457230000	619150000	5.90346e-05
SPAC22E12.01	Glu	1	13363000	187080000	418070000	6.90122e-06
SPCC550.15c	Glu	1	15979000	287620000	545490000	8.25224e-06
SPBC1711.07	Glu	1	19506000	370610000	658670000	1.00737e-05
SPAC7D4.04	Glu	1	823430	45289000	462830000	4.25254e-07
SPAC20G4.07c	Glu	1	15452000	231780000	473000000	7.98007e-06
SPCC825.02	Glu	1	33779000	776910000	1215300000	1.74449e-05
SPBC839.13c	Glu	1	41141000	411410000	679470000	2.1247e-05
SPBC1347.06c	Glu	1	13659000	286830000	306960000	7.05409e-06
SPBC1703.03c	Glu	1	11908000	273890000	276200000	6.1498e-06
SPBC337.07c	Glu	1	17876000	339650000	355030000	9.23193e-06
SPAC3H1.09c	Glu	1	29823000	775390000	970490000	1.54019e-05
SPCC1739.10	Glu	1	16653000	183180000	316330000	8.60032e-06
SPBC1709.08	Glu	1	5447700	348650000	818920000	2.81342e-06
SPAPJ696.02	Glu	1	35435000	744130000	839220000	1.83001e-05
SPBC16C6.06	Glu	1	10521000	547110000	603080000	5.43349e-06
SPCC126.10	Glu	1	16447000	213810000	452300000	8.49393e-06
SPAC1B3.05	Glu	1	17273000	518200000	513880000	8.92051e-06
SPAC15F9.02	Glu	1	23690000	402730000	652470000	1.22345e-05
SPCC1840.06	Glu	1	115640000	1040700000	1475400000	5.97214e-05
SPBC30D10.07c	Glu	1	24681000	666400000	543620000	1.27463e-05
SPCC757.05c	Glu	1	2073500	35249000	76447000	1.07084e-06
SPCC1672.07	Glu	1	9422700	405180000	976640000	4.86628e-06
SPBC3D6.06c	Glu	1	44017000	528210000	489270000	2.27323e-05
SPAC806.07	Glu	1	133110000	1198000000	1990900000	6.87437e-05
SPAC732.01	Glu	1	86566000	259700000	342510000	4.47064e-05
SPAC22F3.07c	Glu	1	89648000	717180000	1140400000	4.6298e-05
SPAC2G11.03c	Glu	1	13926000	445630000	483830000	7.19198e-06
SPCC1442.10c	Glu	1	30475000	396170000	477490000	1.57386e-05
SPAP27G11.10c	Glu	1	5909100	378180000	444220000	3.05171e-06
SPBC1289.10c	Glu	1	3008800	93274000	345140000	1.55387e-06
SPAP32A8.02	Glu	1	39548000	593220000	522900000	2.04243e-05
SPBC354.14c	Glu	1	14575000	408110000	356190000	7.52715e-06
SPBC12C2.03c	Glu	1	5969500	179090000	665580000	3.0829e-06
SPAC17G6.13	Glu	1	16498000	296960000	661850000	8.52027e-06
SPAC1834.05	Glu	1	10350000	196650000	263290000	5.34518e-06
SPAC22F3.13	Glu	1	7288700	342570000	595730000	3.7642e-06
SPBC21C3.07c	Glu	1	22338000	357420000	362200000	1.15363e-05
SPBC19F8.02	Glu	1	40378000	484540000	615130000	2.08529e-05
SPCC63.12c	Glu	1	157610000	1103300000	2012600000	8.13965e-05
SPBC887.02	Glu	1	3795700	110070000	275670000	1.96026e-06
SPAC16C9.06c	Glu	1	12173000	657350000	866100000	6.28666e-06
SPBC25H2.07	Glu	1	141830000	992810000	1214100000	7.32471e-05
SPBP16F5.04	Glu	1	48824000	244120000	235070000	2.52148e-05
SPBP4H10.06c	Glu	1	3632600	247020000	612070000	1.87603e-06
SPAPB1A11.03	Glu	1	4306900	111980000	121950000	2.22427e-06
SPAC25B8.13c	Glu	1	22868000	274420000	371190000	1.181e-05
SPBC725.08	Glu	1	20215000	606460000	768430000	1.04399e-05
SPAC20G8.05c	Glu	1	9539000	505560000	538890000	4.92635e-06
SPCC18.17c	Glu	1	15078000	392020000	807920000	7.78692e-06
SPCC70.07c	Glu	1	34095000	340950000	345430000	1.76081e-05
SPAPB1A10.16	Glu	1	22212000	222120000	242470000	1.14712e-05
SPBC1604.03c	Glu	1	28793000	374310000	318370000	1.48699e-05
SPCC285.05	Glu	1	15622000	140600000	598720000	8.06787e-06
SPAC343.11c	Glu	1	1640900	111580000	NA	8.47431e-07
SPBC29A3.15c	Glu	1	14464000	404990000	555910000	7.46983e-06
SPAC227.14	Glu	1	42265000	549440000	605080000	2.18274e-05
SPCC736.07c	Glu	1	33143000	961150000	1794100000	1.71165e-05
SPBC887.12	Glu	1	4278100	239580000	372040000	2.20939e-06
SPAC4D7.04c	Glu	1	28904000	433560000	552030000	1.49273e-05
SPAC3F10.09	Glu	1	18996000	265940000	499540000	9.81034e-06
SPBP35G2.14	Glu	1	12910000	555130000	836270000	6.66727e-06
SPBC8D2.17	Glu	1	34187000	512810000	726850000	1.76556e-05
SPBC4F6.09	Glu	1	2171600	41260000	164270000	1.12151e-06
SPAC6F12.05c	Glu	1	11601000	336430000	373050000	5.99125e-06
SPCC1183.09c	Glu	1	34963000	139850000	212390000	1.80564e-05
SPAC6F6.11c	Glu	1	35308000	564930000	678090000	1.82346e-05
SPAC630.11	Glu	1	9476700	37907000	89403000	4.89417e-06
SPCC162.07	Glu	1	19525000	429560000	703660000	1.00835e-05
SPBC1734.15	Glu	1	8890400	240040000	302790000	4.59138e-06
SPBC8D2.01	Glu	1	12625000	328240000	894730000	6.52009e-06
SPBC16C6.05	Glu	1	9163900	91639000	370370000	4.73263e-06
SPAC9E9.15	Glu	1	7543600	105610000	254810000	3.89584e-06
SPBC30D10.16	Glu	1	17256000	293350000	1071700000	8.91173e-06
SPAC227.05	Glu	1	57385000	401700000	377780000	2.96361e-05
SPAC16C9.04c	Glu	1	25670000	667430000	501650000	1.32571e-05
SPBC21B10.02	Glu	1	22227000	222270000	391480000	1.1479e-05
SPCC1620.01c	Glu	1	39673000	238040000	524850000	2.04888e-05
SPBC887.15c	Glu	1	39074000	429810000	642610000	2.01795e-05
SPBC685.04c	Glu	1	48611000	243050000	239070000	2.51048e-05
SPAC9G1.11c	Glu	1	15587000	264980000	274160000	8.04979e-06
SPBC18A7.01	Glu	1	11194000	235080000	152290000	5.78106e-06
SPCC1020.07	Glu	1	56458000	677500000	1522500000	2.91573e-05
SPAC1F12.04c	Glu	1	42655000	469210000	541360000	2.20289e-05
SPBC119.08	Glu	1	17765000	302010000	520610000	9.1746e-06
SPAC30D11.03	Glu	1	16630000	482280000	479470000	8.58844e-06
SPBC1778.10c	Glu	1	11068000	320960000	747580000	5.71599e-06
SPCP1E11.11	Glu	1	16397000	491900000	883320000	8.46811e-06
SPAC8C9.05	Glu	1	47945000	335610000	418860000	2.47608e-05
SPBP4H10.08	Glu	1	82445000	412230000	775180000	4.25781e-05
SPCC663.02	Glu	1	12322000	160190000	316710000	6.36361e-06
SPAC1B2.05	Glu	1	24558000	1105100000	713610000	1.26828e-05
SPBC359.03c	Glu	1	23645000	449260000	1055000000	1.22113e-05
SPBC1734.14c	Glu	1	47809000	286850000	359630000	2.46906e-05
SPBC21H7.03c	Glu	1	46712000	840820000	1365400000	2.41241e-05
SPAC2F3.11	Glu	1	13492000	256340000	318570000	6.96784e-06
SPCC1281.07c	Glu	1	7076200	134450000	183980000	3.65445e-06
SPAC23C4.17	Glu	1	8571700	342870000	402790000	4.42679e-06
SPAC167.07c	Glu	1	5525200	270730000	596920000	2.85345e-06
SPAC2H10.02c	Glu	1	25774000	283510000	462060000	1.33108e-05
SPCC895.06	Glu	1	9743800	350780000	572190000	5.03211e-06
SPAC3G6.01	Glu	1	5226300	402420000	820360000	2.69908e-06
SPAPB1A10.10c	Glu	1	37415000	523810000	546870000	1.93227e-05
SPAC10F6.16	Glu	1	45995000	413950000	424150000	2.37538e-05
SPBC337.03	Glu	1	12987000	246750000	538610000	6.70704e-06
SPAC823.03	Glu	1	8322400	249670000	252730000	4.29804e-06
SPAC637.13c	Glu	1	19342000	444860000	579720000	9.98903e-06
SPCP1E11.04c	Glu	1	22608000	519980000	594220000	1.16757e-05
SPAC890.04c	Glu	1	19528000	429630000	1107400000	1.00851e-05
SPBC17D11.08	Glu	1	14330000	300930000	859150000	7.40062e-06
SPBC18E5.12c	Glu	1	14827000	385500000	1008600000	7.65729e-06
SPCC965.14c	Glu	1	67546000	607920000	571100000	3.48836e-05
SPBC29A10.17	Glu	1	16866000	151800000	205230000	8.71032e-06
SPBC15C4.01c	Glu	1	21792000	283300000	441160000	1.12543e-05
SPBC29A10.10c	Glu	1	235950	25955000	16699000	1.21855e-07
SPAC16E8.06c	Glu	1	22688000	521830000	572690000	1.1717e-05
SPBC1683.02	Glu	1	13513000	229710000	235450000	6.97869e-06
SPAC1006.05c	Glu	1	19372000	290580000	354030000	1.00045e-05
SPAC6F6.03c	Glu	1	21750000	652500000	1202900000	1.12326e-05
SPCC14G10.02	Glu	1	2291900	190230000	383970000	1.18363e-06
SPCC1739.14	Glu	1	10355000	476320000	367140000	5.34776e-06
SPCC663.04	Glu	1	451620000	903230000	1826800000	0.000233236
SPBC25B2.10	Glu	1	5430000	108600000	231130000	2.80428e-06
SPAC29A4.08c	Glu	1	33314000	566340000	968470000	1.72048e-05
SPAC2C4.05	Glu	1	233670000	701000000	977220000	0.000120677
SPBC3E7.15c	Glu	1	37620000	601920000	688820000	1.94286e-05
SPBC1A4.03c	Glu	1	5906200	448870000	815120000	3.05021e-06
SPBC23E6.09	Glu	1	9334800	373390000	471230000	4.82089e-06
SPBC3D6.08c	Glu	1	56637000	339820000	334440000	2.92498e-05
SPAC6F12.17	Glu	1	9514900	361570000	565560000	4.9139e-06
SPBC3B8.06	Glu	1	9396700	178540000	352130000	4.85286e-06
SPAC14C4.07	Glu	1	26203000	628870000	701140000	1.35323e-05
SPAC1687.19c	Glu	1	18442000	387290000	601350000	9.52423e-06
SPBC83.13	Glu	1	32534000	455480000	483730000	1.68019e-05
SPBC12C2.13c	Glu	1	8513800	144730000	573050000	4.39689e-06
SPBC119.15	Glu	1	24630000	344830000	576340000	1.272e-05
SPAC22E12.18	Glu	1	13477000	269540000	691270000	6.9601e-06
SPCC1259.05c	Glu	1	203650000	407300000	679690000	0.000105174
SPAC2E1P3.01	Glu	1	13455000	215280000	586680000	6.94874e-06
SPBC543.10	Glu	1	21999000	219990000	443390000	1.13612e-05
SPBC713.04c	Glu	1	14050000	547930000	813430000	7.25602e-06
SPBC25D12.05	Glu	1	15723000	393080000	428060000	8.12003e-06
SPAC23G3.10c	Glu	1	17724000	496270000	546970000	9.15343e-06
SPAC3A12.17c	Glu	1	19123000	382450000	694180000	9.87593e-06
SPAC637.03	Glu	1	26265000	157590000	294820000	1.35644e-05
SPBPB7E8.02	Glu	1	8864800	283670000	817960000	4.57816e-06
SPAC11E3.14	Glu	1	15866000	428380000	542250000	8.19388e-06
SPBC31F10.12	Glu	1	61425000	614250000	731740000	3.17225e-05
SPAC17G8.08c	Glu	1	35041000	420490000	443140000	1.80967e-05
SPAC2E1P5.05	Glu	1	4258600	102210000	96610000	2.19932e-06
SPCC663.13c	Glu	1	67653000	608880000	677560000	3.49389e-05
SPAC1782.01	Glu	1	4018500	361660000	545900000	2.07532e-06
SPAC2G11.06	Glu	1	16210000	437670000	362660000	8.37153e-06
SPBC649.02	Glu	1	82378000	741400000	1076300000	4.25435e-05
SPAC24H6.11c	Glu	1	3356200	117470000	293370000	1.73328e-06
SPBC1215.01	Glu	1	14548000	218220000	253340000	7.51321e-06
SPCC569.08c	Glu	1	32684000	392210000	531050000	1.68794e-05
SPAC20H4.01	Glu	1	8350900	283930000	277380000	4.31276e-06
SPBC119.09c	Glu	1	9169800	64189000	132180000	4.73568e-06
SPCC1450.14c	Glu	1	11414000	365240000	627700000	5.89468e-06
SPBC3B9.16c	Glu	1	6502800	331640000	317640000	3.35832e-06
SPAC328.01c	Glu	1	3910100	242430000	306220000	2.01934e-06
SPAC23D3.09	Glu	1	23819000	428730000	649950000	1.23011e-05
SPAC9G1.06c	Glu	1	1880200	90248000	346170000	9.71015e-07
SPCC63.03	Glu	1	9200800	294430000	427140000	4.75169e-06
SPBP22H7.02c	Glu	1	4535500	199560000	226460000	2.34233e-06
SPBC14C8.14c	Glu	1	9452000	444240000	530690000	4.88142e-06
SPCC576.01c	Glu	1	2253900	40570000	NA	1.16401e-06
SPCC126.15c	Glu	1	44741000	402670000	463260000	2.31062e-05
SPAP14E8.03	Glu	1	20412000	265350000	366820000	1.05416e-05
SPAC30D11.11	Glu	1	9326900	195860000	425830000	4.81681e-06
SPAC4F8.01	Glu	1	7689900	99969000	144250000	3.97139e-06
SPBC557.04	Glu	1	13367000	507930000	335650000	6.90329e-06
SPAC23H3.06	Glu	1	7926000	285340000	383850000	4.09332e-06
SPBC146.03c	Glu	1	1106800	84117000	309850000	5.71599e-07
SPAC12B10.04	Glu	1	552020	9384300	149480000	2.85087e-07
SPAC110.03	Glu	1	119220000	953780000	880150000	6.15703e-05
SPCC16C4.18c	Glu	1	19775000	514140000	632130000	1.02127e-05
SPBC1861.05	Glu	1	7491200	299650000	830750000	3.86877e-06
SPBC725.07	Glu	1	344830	10345000	NA	1.78085e-07
SPAC13G6.09	Glu	1	24630000	320190000	502880000	1.272e-05
SPAC16C9.01c	Glu	1	19556000	371570000	523670000	1.00996e-05
SPBC1604.11	Glu	1	96009000	576050000	683000000	4.95831e-05
SPBC11G11.02c	Glu	1	29985000	569710000	590000000	1.54855e-05
SPAC3H1.02c	Glu	1	11922000	500710000	632530000	6.15703e-06
SPCC663.03	Glu	1	4295400	292080000	350480000	2.21833e-06
SPAC22H12.03	Glu	1	21376000	363390000	298030000	1.10395e-05
SPAC27D7.14c	Glu	1	11343000	589850000	419920000	5.85801e-06
SPBC4.04c	Glu	1	7814400	359460000	517090000	4.03569e-06
SPBC56F2.08c	Glu	1	14076000	464510000	738110000	7.26945e-06
SPAC3C7.05c	Glu	1	9558100	200720000	220330000	4.93621e-06
SPAC24B11.11c	Glu	1	9809800	284480000	461510000	5.0662e-06
SPCC1682.04	Glu	1	11750000	105750000	241890000	6.0682e-06
SPAC1D4.14	Glu	1	2042700	167500000	280420000	1.05494e-06
SPAC19A8.12	Glu	1	6309200	220820000	401420000	3.25834e-06
SPCC285.16c	Glu	1	1286200	75887000	386120000	6.64248e-07
SPBC211.07c	Glu	1	13210000	92470000	157240000	6.82221e-06
SPCC1620.14c	Glu	1	1874000	123690000	329680000	9.67813e-07
SPBC16D10.10	Glu	1	18789000	526080000	790930000	9.70344e-06
SPBC27.04	Glu	1	599980	29999000	223280000	3.09855e-07
SPAC2G11.09	Glu	1	5201700	176860000	364230000	2.68638e-06
SPAC24B11.09	Glu	1	18907000	132350000	416950000	9.76438e-06
SPBC776.08c	Glu	1	6805200	394700000	333120000	3.5145e-06
SPAC20G8.03	Glu	1	35839000	537580000	617230000	1.85088e-05
SPCC162.11c	Glu	1	10079000	272140000	473730000	5.20523e-06
SPBC31F10.15c	Glu	1	151620000	454850000	507460000	7.8303e-05
SPAC6B12.09	Glu	1	23883000	453780000	501490000	1.23342e-05
SPBP16F5.07	Glu	1	17830000	392270000	735470000	9.20817e-06
SPAC23H3.10	Glu	1	13571000	312120000	398260000	7.00864e-06
SPAC1556.01c	Glu	1	1827300	137040000	216760000	9.43696e-07
SPAC2E1P5.04c	Glu	1	4571900	77722000	123770000	2.36112e-06
SPBC30D10.10c	Glu	1	70288	8223700	NA	3.62997e-08
SPAC328.09	Glu	1	23151000	347270000	321880000	1.19562e-05
SPBC1711.10c	Glu	1	11024000	264570000	395290000	5.69326e-06
SPAC823.08c	Glu	1	14216000	369620000	822740000	7.34175e-06
SPAC57A7.06	Glu	1	4600000	193200000	346190000	2.37564e-06
SPBC83.02c	Glu	1	248530000	994140000	1010900000	0.000128351
SPBC577.12	Glu	1	15073000	422030000	537170000	7.78434e-06
SPAC144.04c	Glu	1	14288000	357210000	531540000	7.37893e-06
SPAC4F10.09c	Glu	1	12308000	504640000	908800000	6.35638e-06
SPBC83.15	Glu	1	20225000	424730000	512820000	1.04451e-05
SPAC8F11.09c	Glu	1	16986000	254790000	205000000	8.77229e-06
SPCC757.08	Glu	1	16733000	234260000	188710000	8.64163e-06
SPBC16H5.03c	Glu	1	8348100	292180000	382450000	4.31131e-06
SPAC25H1.08c	Glu	1	42866000	514400000	976170000	2.21378e-05
SPBC19F5.02c	Glu	1	7447800	283020000	439680000	3.84636e-06
SPBC6B1.06c	Glu	1	8375600	301520000	294110000	4.32552e-06
SPAC222.13c	Glu	1	5985400	185550000	306540000	3.09112e-06
SPAC105.02c	Glu	1	135290000	1082300000	956000000	6.98695e-05
SPBC119.12	Glu	1	12906000	322650000	271030000	6.66521e-06
SPBC17G9.04c	Glu	1	11521000	357160000	481640000	5.94994e-06
SPAC1296.01c	Glu	1	14232000	426970000	563180000	7.35001e-06
SPAC1D4.02c	Glu	1	29552000	384170000	386350000	1.52619e-05
SPBC11G11.03	Glu	1	65094000	781130000	805210000	3.36173e-05
SPAC144.18	Glu	1	27396000	219170000	319950000	1.41485e-05
SPCC1442.08c	Glu	1	80575000	564030000	1160300000	4.16124e-05
SPBC725.02	Glu	1	19908000	258800000	317250000	1.02813e-05
SPAC13C5.05c	Glu	1	15024000	390610000	693230000	7.75903e-06
SPAC328.05	Glu	1	2646200	44986000	111110000	1.36661e-06
SPAC644.11c	Glu	1	14178000	255210000	252800000	7.32212e-06
SPAC11D3.04c	Glu	1	22751000	204760000	398710000	1.17496e-05
SPBC1734.03	Glu	1	8074200	363340000	474590000	4.16986e-06
SPBC9B6.05c	Glu	1	137940000	689700000	928930000	7.12381e-05
SPBC16A3.01	Glu	1	34378000	653170000	774770000	1.77543e-05
SPCC1235.11	Glu	1	31461000	251690000	367260000	1.62478e-05
SPAC17H9.05	Glu	1	37341000	485440000	600880000	1.92845e-05
SPAPB2B4.04c	Glu	1	1006100	60363000	184470000	5.19593e-07
SPBC19C2.15c	Glu	1	34007000	238050000	257820000	1.75627e-05
SPCC4G3.02	Glu	1	42280000	380520000	416110000	2.18352e-05
SPAC19A8.03	Glu	1	4785900	129220000	173050000	2.47164e-06
SPBC119.11c	Glu	1	2649900	47698000	238720000	1.36852e-06
SPBC21C3.20c	Glu	1	245850	13522000	279840000	1.26967e-07
SPBC713.07c	Glu	1	15491000	402780000	323360000	8.00021e-06
SPBC1734.01c	Glu	1	8366900	217540000	270830000	4.32102e-06
SPBC215.02	Glu	1	60689000	606890000	515840000	3.13424e-05
SPAC589.04	Glu	1	14403000	201640000	209560000	7.43832e-06
SPCC320.14	Glu	1	8566300	145630000	180340000	4.424e-06
SPAC18B11.10	Glu	1	14038000	435180000	803880000	7.24982e-06
SPAC821.03c	Glu	1	6965700	174140000	355600000	3.59738e-06
SPAC3A11.13	Glu	1	53577000	375040000	690440000	2.76694e-05
SPBC3B9.07c	Glu	1	29944000	359330000	499000000	1.54644e-05
SPAC806.06c	Glu	1	8234100	172920000	284990000	4.25244e-06
SPBC4B4.01c	Glu	1	18376000	367520000	442460000	9.49015e-06
SPCC970.06	Glu	1	22648000	317080000	331350000	1.16964e-05
SPAC26A3.14c	Glu	1	76784000	307140000	370370000	3.96545e-05
SPAC1687.03c	Glu	1	16311000	293590000	397220000	8.4237e-06
SPCC4B3.10c	Glu	1	9639000	269890000	377330000	4.97799e-06
SPBC17G9.02c	Glu	1	15546000	342020000	361470000	8.02862e-06
SPAC23H3.13c	Glu	1	9965500	189340000	312250000	5.14661e-06
SPBC36B7.07	Glu	1	19529000	214820000	351950000	1.00856e-05
SPBC215.07c	Glu	1	7897700	213240000	274210000	4.07871e-06
SPAC12G12.03	Glu	1	31239000	562300000	681370000	1.61332e-05
SPAC1D4.08	Glu	1	24404000	146420000	326320000	1.26033e-05
SPCC553.08c	Glu	1	7622300	297270000	493540000	3.93648e-06
SPBC19G7.16	Glu	1	10891000	261390000	313630000	5.62458e-06
SPAC630.13c	Glu	1	586620	41650000	60004000	3.02956e-07
SPAC1527.03	Glu	1	25914000	466450000	628900000	1.33831e-05
SPAC3H8.08c	Glu	1	685090	19868000	138190000	3.5381e-07
SPBC19C7.12c	Glu	1	14580000	291610000	436900000	7.52973e-06
SPAC6F6.12	Glu	1	5280100	95042000	202350000	2.72687e-06
SPAC26A3.08	Glu	1	43139000	388250000	312140000	2.22788e-05
SPAC227.06	Glu	1	20803000	228830000	343580000	1.07436e-05
SPBC19C2.14	Glu	1	57126000	342760000	416530000	2.95023e-05
SPCC576.02	Glu	1	10410000	135330000	108570000	5.37617e-06
SPBC31E1.06	Glu	1	3985000	203230000	272380000	2.05802e-06
SPAC26F1.12c	Glu	1	28364000	453820000	542910000	1.46484e-05
SPAC1D4.09c	Glu	1	1979700	23757000	82036000	1.0224e-06
SPAC4G8.09	Glu	1	1937900	83330000	160370000	1.00081e-06
SPCC188.08c	Glu	1	3139400	188360000	392790000	1.62132e-06
SPCC569.07	Glu	1	2162300	56221000	298780000	1.1167e-06
SPCC18.06c	Glu	1	29792000	357500000	526130000	1.53859e-05
SPBC2G5.01	Glu	1	34472000	482600000	733610000	1.78028e-05
SPBC428.04	Glu	1	93660000	468300000	693710000	4.837e-05
SPAC144.17c	Glu	1	9391600	262960000	294700000	4.85022e-06
SPAC12B10.01c	Glu	1	1438700	92077000	184480000	7.43006e-07
SPAC1006.09	Glu	1	1635100	94837000	165450000	8.44435e-07
SPAC23H4.14	Glu	1	2664100	109230000	157110000	1.37585e-06
SPBC14F5.11c	Glu	1	6425200	205610000	267200000	3.31825e-06
SPCC16A11.03c	Glu	1	4853700	126200000	163400000	2.50666e-06
SPAC13G6.11c	Glu	1	37630000	451550000	424080000	1.94337e-05
SPBC1105.09	Glu	1	29671000	148360000	163620000	1.53234e-05
SPAC1D4.10	Glu	1	5207000	171830000	474630000	2.68912e-06
SPCC16C4.11	Glu	1	12283000	221100000	321480000	6.34346e-06
SPBC16G5.07c	Glu	1	20285000	405690000	504260000	1.0476e-05
SPAC2F3.02	Glu	1	41770000	459470000	2317300000	2.15718e-05
SPAC4G9.17c	Glu	1	11346000	294990000	469940000	5.85956e-06
SPAC23H4.15	Glu	1	7025600	259950000	333460000	3.62832e-06
SPAC23G3.03	Glu	1	21065000	400240000	451340000	1.08789e-05
SPBC11C11.08	Glu	1	45619000	547430000	682100000	2.35596e-05
SPCC16A11.17	Glu	1	6697900	308100000	757220000	3.45908e-06
SPAC2F3.05c	Glu	1	23813000	428630000	530920000	1.2298e-05
SPAC869.10c	Glu	1	3443100	34431000	41971000	1.77816e-06
SPAC3F10.17	Glu	1	7353900	147080000	353400000	3.79787e-06
SPCC16C4.08c	Glu	1	7673300	122770000	157670000	3.96282e-06
SPCC126.12	Glu	1	39477000	434250000	466070000	2.03876e-05
SPCC188.07	Glu	1	2245300	80832000	394800000	1.15957e-06
SPBC17D11.03c	Glu	1	18811000	206920000	283760000	9.7148e-06
SPAPJ698.03c	Glu	1	6684200	374320000	437270000	3.45201e-06
SPAPB17E12.14c	Glu	1	8910300	294040000	689430000	4.60166e-06
SPAC607.06c	Glu	1	15688000	502000000	720900000	8.10195e-06
SPCC16C4.07	Glu	1	11215000	269150000	530240000	5.7919e-06
SPBC1685.05	Glu	1	1055700	51727000	62424000	5.45208e-07
SPBC1604.14c	Glu	1	3877000	151200000	295050000	2.00225e-06
SPBC691.04	Glu	1	15512000	449850000	748790000	8.01106e-06
SPBC725.10	Glu	1	12439000	99515000	260760000	6.42403e-06
SPCC777.05	Glu	1	12098000	133080000	202160000	6.24792e-06
SPBC29A3.06	Glu	1	6388800	191660000	353750000	3.29945e-06
SPAP27G11.09c	Glu	1	35146000	702910000	766070000	1.81509e-05
SPBP8B7.09c	Glu	1	9074800	353920000	408780000	4.68661e-06
SPAC1786.02	Glu	1	8448500	168970000	273960000	4.36317e-06
SPAC2F3.13c	Glu	1	12708000	203320000	609040000	6.56295e-06
SPAC23G3.02c	Glu	1	1076000	259310000	516120000	5.55692e-07
SPAC18B11.07c	Glu	1	122790000	368380000	407800000	6.3414e-05
SPBC365.13c	Glu	1	20778000	394780000	308030000	1.07306e-05
SPAC23C11.15	Glu	1	2886700	147220000	289110000	1.49081e-06
SPBC16A3.12c	Glu	1	5960800	154980000	307900000	3.07841e-06
SPCC14G10.01	Glu	1	10813000	118940000	257900000	5.58429e-06
SPCC4B3.09c	Glu	1	126450000	885170000	1415400000	6.53042e-05
SPAC15E1.02c	Glu	1	3994700	27963000	88126000	2.06303e-06
SPAPB1E7.05	Glu	1	6494900	337740000	599850000	3.35424e-06
SPAC16.03c	Glu	1	34406000	516090000	470570000	1.77687e-05
SPCC16C4.01	Glu	1	5524300	99438000	201890000	2.85298e-06
SPBC2G2.06c	Glu	1	2207900	68445000	159300000	1.14025e-06
SPAC15A10.11	Glu	1	1477800	134480000	242880000	7.63199e-07
SPAC17A5.09c	Glu	1	13202000	198030000	626340000	6.81808e-06
SPAC343.01c	Glu	1	16408000	328170000	431020000	8.47379e-06
SPBC16G5.10	Glu	1	22747000	272970000	411520000	1.17475e-05
SPBC11G11.05	Glu	1	24741000	296890000	431840000	1.27773e-05
SPBC29A3.11c	Glu	1	4368800	74270000	306320000	2.25623e-06
SPBC211.04c	Glu	1	2968800	148440000	289760000	1.53321e-06
SPBC28F2.08c	Glu	1	4882200	185520000	365590000	2.52138e-06
SPBC211.03c	Glu	1	1842500	134500000	253250000	9.51546e-07
SPBC25B2.01	Glu	1	8435800	303690000	326030000	4.35661e-06
SPBC1289.11	Glu	1	16468000	329370000	534120000	8.50478e-06
SPBC1289.09	Glu	1	15208000	182490000	681210000	7.85406e-06
SPBC25D12.03c	Glu	1	8013300	352580000	394080000	4.13841e-06
SPAC11D3.01c	Glu	1	16678000	83392000	385920000	8.61323e-06
SPCC736.04c	Glu	1	32476000	519620000	624580000	1.6772e-05
SPCC736.12c	Glu	1	7208200	180200000	675170000	3.72262e-06
SPBC646.02	Glu	1	4190300	280750000	436110000	2.16405e-06
SPAC806.02c	Glu	1	5077200	121850000	277540000	2.62208e-06
SPAC1A6.03c	Glu	1	24022000	504460000	579860000	1.2406e-05
SPAC22G7.02	Glu	1	2257500	99328000	97729000	1.16587e-06
SPBC13G1.03c	Glu	1	12100000	193600000	339940000	6.24896e-06
SPBC11C11.10	Glu	1	4614800	115370000	297470000	2.38328e-06
SPAC17G8.02	Glu	1	13993000	139930000	203250000	7.22658e-06
SPAC8E11.07c	Glu	1	107090000	535470000	515810000	5.53058e-05
SPAC24B11.13	Glu	1	40389000	727000000	928420000	2.08586e-05
SPBC25B2.06c	Glu	1	13711000	246800000	285510000	7.08094e-06
SPBC15C4.04c	Glu	1	34361000	343610000	431820000	1.77455e-05
SPAC57A10.11c	Glu	1	33117000	463630000	1275700000	1.7103e-05
SPBP22H7.06	Glu	1	24569000	221120000	225360000	1.26885e-05
SPAC1F7.10	Glu	1	11683000	151870000	288110000	6.0336e-06
SPCC61.03	Glu	1	5011600	90209000	131230000	2.5882e-06
SPCC1919.05	Glu	1	1313300	93243000	93966000	6.78244e-07
SPBC887.01	Glu	1	37852000	416370000	594140000	1.95484e-05
SPAC17G6.12	Glu	1	6177500	271810000	247670000	3.19032e-06
SPAC16.04	Glu	1	18460000	609180000	571220000	9.53353e-06
SPBC19G7.01c	Glu	1	6762700	371950000	492870000	3.49255e-06
SPCC1840.09	Glu	1	19681000	275530000	229150000	1.01641e-05
SPAC29A4.16	Glu	1	7394000	214430000	239750000	3.81858e-06
SPBC36B7.03	Glu	1	15419000	354640000	771800000	7.96303e-06
SPAC1002.13c	Glu	1	20706000	124240000	606450000	1.06935e-05
SPAC3C7.12	Glu	1	15003000	315070000	268500000	7.74819e-06
SPBC2F12.10	Glu	1	18308000	292920000	384250000	9.45503e-06
SPAP27G11.02	Glu	1	11280000	214320000	237320000	5.82547e-06
SPBC3E7.11c	Glu	1	8932600	178650000	177030000	4.61318e-06
SPCC1840.07c	Glu	1	24434000	366510000	361830000	1.26188e-05
SPBC409.07c	Glu	1	5672200	147480000	156990000	2.92937e-06
SPAC19D5.07	Glu	1	1403300	32275000	49985000	7.24724e-07
SPCC16A11.16c	Glu	1	25443000	432530000	591550000	1.31398e-05
SPAC57A7.07c	Glu	1	7789900	140220000	176090000	4.02304e-06
SPBC1347.04	Glu	1	20298000	365370000	586390000	1.04828e-05
SPAC1786.03	Glu	1	7367400	221020000	413530000	3.80484e-06
SPAC7D4.11c	Glu	1	2485600	96940000	204170000	1.28367e-06
SPBC83.05	Glu	1	2968700	124690000	255990000	1.53316e-06
SPCC18.11c	Glu	1	46053000	184210000	267120000	2.37837e-05
SPCC1442.05c	Glu	1	20935000	251230000	409560000	1.08117e-05
SPCC645.10	Glu	1	5922600	153990000	491000000	3.05868e-06
SPBC28F2.02	Glu	1	24811000	396970000	592140000	1.28135e-05
SPBC365.10	Glu	1	20301000	649620000	1128200000	1.04843e-05
SPBC887.10	Glu	1	7483600	217030000	325520000	3.86485e-06
SPCC24B10.17	Glu	1	49202000	442820000	581920000	2.541e-05
SPAC12G12.05c	Glu	1	43483000	391350000	426170000	2.24565e-05
SPBC1347.09	Glu	1	18431000	258030000	414720000	9.51855e-06
SPMIT.09	Glu	1	354650000	354650000	638180000	0.000183156
SPBC25H2.09	Glu	1	35743000	357430000	606740000	1.84592e-05
SPCC594.01	Glu	1	10422000	375180000	910790000	5.38236e-06
SPBC29A3.16	Glu	1	46693000	280160000	670250000	2.41143e-05
SPAC1071.06	Glu	1	15761000	457080000	548430000	8.13965e-06
SPCC790.02	Glu	1	3065500	131820000	299290000	1.58315e-06
SPAPB1A10.13	Glu	1	8044600	257430000	528300000	4.15457e-06
SPAC5D6.04	Glu	1	6203400	99254000	154920000	3.2037e-06
SPCC364.01	Glu	1	2558300	46049000	NA	1.32122e-06
SPBC800.14c	Glu	1	43037000	215180000	433030000	2.22261e-05
SPBC1711.16	Glu	1	15431000	324050000	888100000	7.96923e-06
SPAC688.07c	Glu	1	2283500	121030000	272120000	1.1793e-06
SPAC1B3.12c	Glu	1	149130000	447400000	352880000	7.70171e-05
SPCC777.12c	Glu	1	12382000	160960000	207910000	6.39459e-06
SPBC15C4.05	Glu	1	2423700	181780000	281210000	1.2517e-06
SPCC4G3.17	Glu	1	46891000	562690000	778280000	2.42165e-05
SPCC1827.05c	Glu	1	25240000	302880000	315920000	1.3035e-05
SPBC3B9.10	Glu	1	37777000	377770000	429450000	1.95097e-05
SPBC12D12.07c	Glu	1	33200000	298800000	441250000	1.71459e-05
SPBC16A3.10	Glu	1	6435200	154440000	233820000	3.32341e-06
SPBC1683.06c	Glu	1	9992200	109910000	77537000	5.1604e-06
SPBC776.13	Glu	1	2029100	105510000	128060000	1.04791e-06
SPAC637.06	Glu	1	15782000	220950000	391570000	8.1505e-06
SPCC970.10c	Glu	1	4208000	180940000	327340000	2.17319e-06
SPAC1B3.20	Glu	1	44577000	222880000	433240000	2.30215e-05
SPAC1805.04	Glu	1	1398800	78334000	244680000	7.224e-07
SPAC17H9.04c	Glu	1	14667000	293350000	275730000	7.57466e-06
SPAC13G6.07c	Glu	1	65578000	590200000	954320000	3.38673e-05
SPAC664.03	Glu	1	13320000	253070000	268210000	6.87902e-06
SPAC19D5.05c	Glu	1	11648000	163070000	224330000	6.01552e-06
SPBC26H8.08c	Glu	1	24248000	533450000	821500000	1.25227e-05
SPAC22E12.05c	Glu	1	13406000	134060000	256600000	6.92343e-06
SPAC3G6.09c	Glu	1	3083900	120270000	222280000	1.59266e-06
SPAC29E6.05c	Glu	1	40323000	403230000	733650000	2.08245e-05
SPAPB24D3.01	Glu	1	39696000	1071800000	504760000	2.05007e-05
SPBC16D10.03	Glu	1	13078000	287710000	254450000	6.75404e-06
SPAC13A11.04c	Glu	1	68566000	1508500000	2043400000	3.54104e-05
SPBP8B7.17c	Glu	1	19291000	405100000	565290000	9.96269e-06
SPCC1235.05c	Glu	1	4427200	252350000	455930000	2.28639e-06
SPCC1739.08c	Glu	1	3043100	45646000	32441000	1.57159e-06
SPCC1739.01	Glu	1	5609300	157060000	276850000	2.89688e-06
SPBPB2B2.01	Glu	1	1006500	19124000	36999000	5.19799e-07
SPAC630.05	Glu	1	1379000	53782000	30947000	7.12174e-07
SPAC1851.03	Glu	1	27652000	276520000	168340000	1.42807e-05
SPBC1683.03c	Glu	1	9377600	84398000	122570000	4.84299e-06
SPAC3F10.16c	Glu	1	7278800	247480000	721140000	3.75908e-06
SPCC126.03	Glu	1	7207300	237840000	380540000	3.72216e-06
SPAC4F8.13c	Glu	1	2129300	176730000	252400000	1.09966e-06
SPAC17G8.01c	Glu	1	3607300	183970000	209320000	1.86296e-06
SPCC24B10.05	Glu	1	87054000	348210000	613030000	4.49584e-05
SPAC1565.06c	Glu	1	12208000	134290000	161460000	6.30473e-06
SPBC3B8.08	Glu	1	20741000	186670000	433980000	1.07115e-05
SPAPB18E9.01	Glu	1	5023100	130600000	157450000	2.59414e-06
SPAC15A10.13	Glu	1	5691500	204890000	292990000	2.93933e-06
SPAC9.02c	Glu	1	39432000	433750000	707110000	2.03644e-05
SPAC13G6.14	Glu	1	22756000	295820000	465320000	1.17522e-05
SPAC22H10.05c	Glu	1	19450000	350110000	190060000	1.00448e-05
SPBC6B1.10	Glu	1	5339800	165530000	398570000	2.7577e-06
SPBC17A3.01c	Glu	1	8227200	197450000	178310000	4.24888e-06
SPAC24C9.10c	Glu	1	6431300	96469000	244780000	3.3214e-06
SPAC23H4.07c	Glu	1	21905000	328570000	360280000	1.13127e-05
SPCP25A2.03	Glu	1	2903400	124850000	349190000	1.49944e-06
SPBC106.10	Glu	1	3671800	77109000	237750000	1.89627e-06
SPAC3A12.15	Glu	1	942060	37682000	302030000	4.8652e-07
SPBC337.14	Glu	1	37271000	335440000	388770000	1.92483e-05
SPAC637.10c	Glu	1	141090000	1128700000	2642700000	7.28649e-05
SPBC29B5.04c	Glu	1	4231700	152340000	457160000	2.18543e-06
SPBC1778.07	Glu	1	17106000	239490000	355080000	8.83427e-06
SPCC4G3.18	Glu	1	8440700	312300000	366130000	4.35914e-06
SPCC74.06	Glu	1	306550	37093000	357640000	1.58315e-07
SPAC869.05c	Glu	1	117540	4231500	8413700	6.07027e-08
SPBC3B8.09	Glu	1	5983500	143610000	249980000	3.09013e-06
SPAC24C9.16c	Glu	1	69023000	207070000	322020000	3.56464e-05
SPAC664.02c	Glu	1	6221300	223970000	277100000	3.21294e-06
SPAC8E11.04c	Glu	1	16840000	185240000	158680000	8.69689e-06
SPAC30.02c	Glu	1	17675000	300470000	258490000	9.12812e-06
SPAC1486.09	Glu	1	9646200	183280000	237450000	4.98171e-06
SPAC22G7.05	Glu	1	8058600	217580000	251430000	4.1618e-06
SPCC1235.10c	Glu	1	3527700	119940000	358400000	1.82185e-06
SPAC9G1.02	Glu	1	1276600	89364000	168930000	6.59291e-07
SPBC3B9.13c	Glu	1	115640000	346920000	552840000	5.97214e-05
SPBC428.01c	Glu	1	9341300	317600000	340220000	4.82425e-06
SPAC4G9.08c	Glu	1	4153000	236720000	187440000	2.14479e-06
SPBC23E6.10c	Glu	1	29322000	674400000	585040000	1.51431e-05
SPBC2A9.08c	Glu	1	21536000	215360000	387750000	1.11221e-05
SPAC1F7.09c	Glu	1	8716100	165610000	203350000	4.50137e-06
SPAC24C9.14	Glu	1	11216000	157020000	242050000	5.79242e-06
SPBC1718.06	Glu	1	10615000	467050000	448210000	5.48204e-06
SPAC24B11.10c	Glu	1	2093900	108880000	266410000	1.08138e-06
SPAC1783.02c	Glu	1	18217000	273260000	479940000	9.40804e-06
SPCC1840.01c	Glu	1	19985000	179860000	153990000	1.03211e-05
SPAC10F6.14c	Glu	1	4698100	155040000	166450000	2.4263e-06
SPBC1198.13c	Glu	1	16185000	258960000	328600000	8.35862e-06
SPAC23D3.13c	Glu	1	658540	51366000	228850000	3.40098e-07
SPCC794.01c	Glu	1	15908000	461340000	393550000	8.21557e-06
SPAC17D4.04	Glu	1	3229200	129170000	194270000	1.6677e-06
SPBC1709.06	Glu	1	5807200	174220000	390360000	2.99909e-06
SPBC3B9.08c	Glu	1	14222000	156440000	144220000	7.34485e-06
SPBC530.05	Glu	1	2050600	82024000	52874000	1.05902e-06
SPAP8A3.03	Glu	1	29549000	472790000	526510000	1.52604e-05
SPBC646.12c	Glu	1	4987900	204500000	175910000	2.57596e-06
SPBC1539.10	Glu	1	12290000	122900000	169750000	6.34708e-06
SPAC23C11.03	Glu	1	4244200	97617000	194360000	2.19189e-06
SPAC222.11	Glu	1	10834000	216680000	323850000	5.59514e-06
SPCC364.04c	Glu	1	4678800	154400000	277270000	2.41633e-06
SPCC306.05c	Glu	1	17506000	262590000	261770000	9.04084e-06
SPAC31A2.14	Glu	1	4410000	224910000	154250000	2.27751e-06
SPBC2G2.13c	Glu	1	8868000	186230000	349460000	4.57981e-06
SPBC839.10	Glu	1	6761200	229880000	252920000	3.49177e-06
SPBC31F10.02	Glu	1	9674100	48370000	315820000	4.99612e-06
SPBC30D10.06	Glu	1	44481000	311360000	142350000	2.29719e-05
SPAC27F1.09c	Glu	1	2590600	147670000	122780000	1.3379e-06
SPCP1E11.10	Glu	1	33940000	339400000	474940000	1.75281e-05
SPCC548.06c	Glu	1	9608200	163340000	269760000	4.96208e-06
SPAC4D7.13	Glu	1	4366500	152830000	185440000	2.25505e-06
SPBC409.18	Glu	1	21076000	210760000	282860000	1.08845e-05
SPAC5H10.05c	Glu	1	23140000	300820000	411750000	1.19505e-05
SPAC1071.05	Glu	1	15542000	233140000	279880000	8.02655e-06
SPAC1F3.01	Glu	1	4331100	186240000	355240000	2.23676e-06
SPAC1565.07c	Glu	1	2038000	130430000	179470000	1.05251e-06
SPBC36.12c	Glu	1	4174900	83497000	180950000	2.1561e-06
SPAPB8E5.04c	Glu	1	52080000	364560000	423350000	2.68963e-05
SPAC29E6.03c	Glu	1	2736900	166950000	284430000	1.41345e-06
SPAC24H6.03	Glu	1	1702000	76592000	186630000	8.78985e-07
SPAPB1A10.06c	Glu	1	1866600	104530000	190880000	9.63992e-07
SPAC8F11.08c	Glu	1	17431000	313760000	209400000	9.00211e-06
SPAC2F7.14c	Glu	1	9529700	123890000	474640000	4.92154e-06
SPCC550.03c	Glu	1	2142400	137110000	217850000	1.10643e-06
SPBP23A10.05	Glu	1	15485000	263240000	354860000	7.99711e-06
SPBC36.05c	Glu	1	10556000	242800000	334540000	5.45157e-06
SPBC14F5.08	Glu	1	8802100	211250000	323250000	4.54578e-06
SPBC30D10.08	Glu	1	9798400	166570000	422980000	5.06031e-06
SPAC3A12.13c	Glu	1	16095000	257530000	351410000	8.31214e-06
SPBC16G5.09	Glu	1	18893000	453420000	534260000	9.75715e-06
SPBC1921.03c	Glu	1	1804900	50537000	NA	9.32127e-07
SPBC405.06	Glu	1	11540000	230790000	232380000	5.95975e-06
SPBP22H7.07	Glu	1	8524900	230170000	544960000	4.40262e-06
SPBC8D2.15	Glu	1	21860000	502780000	924770000	1.12894e-05
SPCC1827.04	Glu	1	5155500	159820000	851430000	2.66252e-06
SPCC4G3.13c	Glu	1	41078000	410780000	1072200000	2.12144e-05
SPCC18B5.08c	Glu	1	1436100	67496000	256850000	7.41663e-07
SPBP35G2.02	Glu	1	17255000	155300000	187660000	8.91122e-06
SPAC637.08	Glu	1	16172000	226410000	241460000	8.35191e-06
SPAC1834.08	Glu	1	1748200	143350000	588600000	9.02845e-07
SPAC17A5.16	Glu	1	3308900	145590000	320270000	1.70886e-06
SPAC1687.11	Glu	1	4324400	108110000	290680000	2.2333e-06
SPAC13G7.12c	Glu	1	8295700	199100000	189830000	4.28425e-06
SPCC4B3.17	Glu	1	11060000	199080000	182820000	5.71186e-06
SPAC56E4.05	Glu	1	32857000	164280000	212230000	1.69688e-05
SPAC17A2.14	Glu	1	2870200	66015000	109800000	1.48229e-06
SPAC8E11.05c	Glu	1	9462600	151400000	189150000	4.88689e-06
SPBC337.13c	Glu	1	8385800	125790000	199590000	4.33078e-06
SPAC29B12.08	Glu	1	14062000	182800000	219020000	7.26222e-06
SPBC2A9.06c	Glu	1	8554400	119760000	385880000	4.41786e-06
SPAC343.02	Glu	1	16169000	145520000	166540000	8.35036e-06
SPBC13A2.02;REV__SPAC323.05c	Glu	1	13766000	399200000	395010000	7.10935e-06
SPAC4F10.04	Glu	1	5539300	121860000	119540000	2.86073e-06
SPAC9G1.12	Glu	1	8912100	204980000	292370000	4.60259e-06
SPCC4G3.16	Glu	1	3830400	84268000	195540000	1.97818e-06
SPBC14C8.12	Glu	1	48049000	288290000	359910000	2.48146e-05
SPBC1709.15c	Glu	1	3770600	158360000	379120000	1.9473e-06
SPBC1778.03c	Glu	1	11171000	245770000	380150000	5.76918e-06
SPAC23D3.16	Glu	1	8596300	42982000	94465000	4.4395e-06
SPAC27E2.09	Glu	1	193790	23642000	278280000	1.00081e-07
SPAC644.09	Glu	1	21514000	301190000	404520000	1.11107e-05
SPCC285.14	Glu	1	487310	27777000	61616000	2.51668e-07
SPBC1711.05	Glu	1	46981000	422830000	476580000	2.4263e-05
SPCC1795.10c	Glu	1	27108000	162650000	186610000	1.39997e-05
SPAC27F1.08	Glu	1	6100300	115910000	178050000	3.15045e-06
SPBC36.03c	Glu	1	13091000	183280000	194890000	6.76075e-06
SPAC3F10.19	Glu	1	71234000	356170000	337950000	3.67883e-05
SPAC1002.07c	Glu	1	41076000	328610000	364530000	2.12134e-05
SPAC1834.06c	Glu	1	6981800	153600000	216740000	3.6057e-06
SPAC15E1.08	Glu	1	36445000	437340000	613830000	1.88218e-05
SPCC4B3.04c	Glu	1	2097600	148930000	204490000	1.08329e-06
SPBC16E9.06c	Glu	1	16942000	135530000	147370000	8.74957e-06
SPBC25B2.05	Glu	1	17298000	259460000	254370000	8.93342e-06
SPBC25H2.03	Glu	1	2912100	125220000	104340000	1.50393e-06
SPAC22H12.05c	Glu	1	4350600	156620000	209410000	2.24684e-06
SPAC27E2.10c	Glu	1	12502000	237530000	382890000	6.45657e-06
SPCC132.01c	Glu	1	9665900	347970000	570070000	4.99188e-06
SPAC6G9.08	Glu	1	21241000	361090000	318240000	1.09698e-05
SPAC1782.05	Glu	1	13468000	202020000	265840000	6.95545e-06
SPBC2D10.04	Glu	1	2691700	78058000	253570000	1.39011e-06
SPCC330.09	Glu	1	3142900	100570000	360460000	1.62313e-06
SPAC15A10.05c	Glu	1	7995400	95945000	410460000	4.12917e-06
SPBC1105.04c	Glu	1	6272000	169340000	124890000	3.23913e-06
SPBC1773.05c	Glu	1	8917000	178340000	226770000	4.60512e-06
SPAC25B8.08	Glu	1	1069300	38493000	117910000	5.52232e-07
SPAC5H10.09c	Glu	1	2944800	41228000	177250000	1.52082e-06
SPBC1703.14c	Glu	1	6408500	294790000	356030000	3.30962e-06
SPCC1827.01c	Glu	1	6418200	198960000	238160000	3.31463e-06
SPBC337.15c	Glu	1	23051000	322710000	167810000	1.19045e-05
SPCC1223.11	Glu	1	11927000	226610000	310030000	6.15961e-06
SPAC823.12	Glu	1	4318700	207300000	220730000	2.23036e-06
SPAC4F10.15c	Glu	1	5312200	159370000	234190000	2.74345e-06
SPAC4A8.07c	Glu	1	9781500	215190000	354140000	5.05158e-06
SPBC1685.03	Glu	1	12482000	162270000	174620000	6.44624e-06
SPCC16A11.15c	Glu	1	1293400	10348000	68218000	6.67967e-07
SPCC320.09	Glu	1	3736700	85943000	155930000	1.92979e-06
SPCC18B5.11c	Glu	1	4782200	119550000	177550000	2.46973e-06
SPAC23C4.11	Glu	1	55029000	220120000	323620000	2.84193e-05
SPAC688.03c	Glu	1	6078100	66859000	73077000	3.13899e-06
SPAC139.06	Glu	1	9143000	137150000	171730000	4.72183e-06
SPBC16A3.09c	Glu	1	7302300	182560000	613610000	3.77122e-06
SPAC3F10.08c	Glu	1	1276400	21699000	10036000	6.59187e-07
SPAC3A11.11c	Glu	1	8837000	141390000	290930000	4.5638e-06
SPBC3H7.05c	Glu	1	2510100	40161000	116990000	1.29632e-06
SPCC4B3.16	Glu	1	11703000	140430000	142470000	6.04393e-06
SPAC8C9.16c	Glu	1	7587600	68288000	123860000	3.91856e-06
SPCC613.08	Glu	1	21214000	275790000	417720000	1.09558e-05
SPBC1861.03	Glu	1	3623900	148580000	313210000	1.87154e-06
SPAC29B12.01	Glu	1	3027200	208880000	220360000	1.56338e-06
SPBC2G2.02	Glu	1	2887300	179020000	360810000	1.49112e-06
SPAC19G12.11	Glu	1	26885000	349510000	931590000	1.38846e-05
SPBC30B4.04c	Glu	1	368260	14362000	NA	1.90185e-07
SPBC16E9.12c	Glu	1	44097000	264580000	284150000	2.27736e-05
SPBC543.08	Glu	1	8101000	89111000	173000000	4.1837e-06
SPBC3B9.14c	Glu	1	14667000	234670000	216300000	7.57466e-06
SPBC1271.09	Glu	1	1391100	31996000	30217000	7.18423e-07
SPBC119.06	Glu	1	11818000	200900000	361460000	6.10332e-06
SPAC25B8.04c	Glu	1	11493000	241350000	189870000	5.93547e-06
SPCC895.07	Glu	1	17626000	705030000	430140000	9.10282e-06
SPAC22A12.14c	Glu	1	25373000	482090000	650400000	1.31037e-05
SPBC19G7.19	Glu	1	118370000	355100000	1043800000	6.11313e-05
SPCP1E11.02	Glu	1	8461900	296160000	509580000	4.37009e-06
SPBC106.14c	Glu	1	6239000	174690000	497710000	3.22209e-06
SPAC26H5.02c	Glu	1	96073	2690100	NA	4.96162e-08
SPBC342.04	Glu	1	21544000	258530000	282330000	1.11262e-05
SPBC1778.08c	Glu	1	37462000	262230000	521640000	1.9347e-05
SPBP4H10.05c	Glu	1	17257000	310620000	234920000	8.91225e-06
SPBC2G2.01c	Glu	1	6998300	132970000	239130000	3.61422e-06
SPAC343.04c	Glu	1	3503000	98083000	249760000	1.8091e-06
SPCC1450.03	Glu	1	3354900	30194000	299620000	1.73261e-06
SPAC29B12.06c	Glu	1	15044000	195570000	371580000	7.76936e-06
SPAC1F12.05	Glu	1	3904900	46858000	163980000	2.01666e-06
[truncated: 67,680 more rows]
