# Supplementary material for: Growth-rate-dependent and nutrient-specific gene expression resource allocation in fission yeast
Source: Life Sci Alliance. 2022 Feb 28;5(5):e202101223. doi: 10.26508/lsa.202101223 (PMC8886410; doi:10.26508/lsa.202101223)
Supplement: Supplementary file 5 [file LSA-2021-01223_TableS5.xlsx]

## Sheet: TableS5
PomBaseID	medium	replicate	normalised_counts	rpkm	raw_counts	psi_M
SPAC1002.01	Glu	1	141.958	9.38924	226	8.33088e-06
SPAC1002.02	Glu	1	1479.25	76.5698	2355	6.79389e-05
SPAC1002.03c	Glu	1	4521.93	58.2632	7199	5.16958e-05
SPAC1002.04c	Glu	1	501.251	29.8378	798	2.64745e-05
SPAC1002.05c	Glu	1	1612.42	26.8106	2567	2.37886e-05
SPAC1002.06c	Glu	1	175.249	17.5328	279	1.55565e-05
SPAC1002.07c	Glu	1	2471.08	174.077	3934	0.000154455
SPAC1002.08c	Glu	1	1352.37	43.8705	2153	3.89254e-05
SPAC1002.09c	Glu	1	22593.3	525.355	35969	0.000466137
SPAC1002.10c	Glu	1	564.064	11.3627	898	1.00819e-05
SPAC1002.11	Glu	1	574.742	11.7569	915	1.04317e-05
SPAC1002.12c	Glu	1	2573.46	55.9088	4097	4.96067e-05
SPAC1002.13c	Glu	1	15702.1	447.222	24998	0.000396811
SPAC1002.14	Glu	1	2687.16	73.3751	4278	6.51043e-05
SPAC1002.15c	Glu	1	282.032	15.4732	449	1.37291e-05
SPAC1002.16c	Glu	1	895.091	21.3127	1425	1.89104e-05
SPAC1002.17c	Glu	1	1277.62	74.1979	2034	6.58343e-05
SPAC1002.18	Glu	1	2836.02	84.4097	4515	7.4895e-05
SPAC1002.19	Glu	1	1228	33.2268	1955	2.94815e-05
SPAC1002.20	Glu	1	11.3064	1.31967	18	1.17092e-06
SPAC1006.01	Glu	1	11993	315.886	19093	0.000280279
SPAC1006.02	Glu	1	2754.37	88.8664	4385	7.88494e-05
SPAC1006.03c	Glu	1	1483.02	24.7629	2361	2.19716e-05
SPAC1006.04c	Glu	1	197.862	2.47179	315	2.19317e-06
SPAC1006.05c	Glu	1	1133.78	34.0002	1805	3.01677e-05
SPAC1006.06	Glu	1	3177.73	32.6419	5059	2.89625e-05
SPAC1006.07	Glu	1	53175.3	1610.87	84656	0.00142929
SPAC1006.08	Glu	1	726.751	22.072	1157	1.9584e-05
SPAC1006.09	Glu	1	4375.58	36.2511	6966	3.21649e-05
SPAC1039.01	Glu	1	368.715	7.72831	587	6.85717e-06
SPAC1039.02	Glu	1	7274.42	143.861	11581	0.000127645
SPAC1039.03	Glu	1	868.081	30.2187	1382	2.68125e-05
SPAC1039.04	Glu	1	1027.63	24.0832	1636	2.13685e-05
SPAC1039.05c	Glu	1	1925.23	29.3102	3065	2.60063e-05
SPAC1039.06	Glu	1	2873.08	82.2238	4574	7.29555e-05
SPAC1039.07c	Glu	1	1508.78	40.0056	2402	3.54962e-05
SPAC1039.08	Glu	1	207.912	9.13384	331	8.10427e-06
SPAC1039.09	Glu	1	1017.58	20.8513	1620	1.8501e-05
SPAC1039.10	Glu	1	487.432	45.6933	776	4.05427e-05
SPAC1039.11c	Glu	1	2667.68	31.8873	4247	2.82929e-05
SPAC105.01c	Glu	1	1552.75	20.7708	2472	1.84295e-05
SPAC105.02c	Glu	1	1025.74	71.4142	1633	6.33644e-05
SPAC105.03c	Glu	1	1790.81	30.0708	2851	2.66813e-05
SPAC1071.01c	Glu	1	3660.76	60.3638	5828	5.35596e-05
SPAC1071.02	Glu	1	2036.41	23.7921	3242	2.11103e-05
SPAC1071.03c	Glu	1	2016.94	70.8329	3211	6.28486e-05
SPAC1071.04c	Glu	1	207.284	14.6892	330	1.30335e-05
SPAC1071.05	Glu	1	1401.99	49.0919	2232	4.35583e-05
SPAC1071.06	Glu	1	2261.28	51.3766	3600	4.55855e-05
SPAC1071.07c	Glu	1	50378.8	3869.54	80204	0.00343336
SPAC1071.08	Glu	1	11025.6	1182.56	17553	0.00104926
SPAC1071.09c	Glu	1	1334.16	56.1258	2124	4.97993e-05
SPAC1071.10c	Glu	1	96710.6	1251.49	153965	0.00111043
SPAC1071.11	Glu	1	425.247	20.6641	677	1.83349e-05
SPAC1071.12c	Glu	1	1068.46	81.0213	1701	7.18886e-05
SPAC1071.13	Glu	1	61.5571	6.91377	98	6.13445e-06
SPAC1093.01	Glu	1	6876.18	64.868	10947	5.7556e-05
SPAC1093.02	Glu	1	4738.64	243.169	7544	0.000215759
SPAC1093.03	Glu	1	1486.16	21.2405	2366	1.88462e-05
SPAC1093.04c	Glu	1	1219.84	28.9872	1942	2.57197e-05
SPAC1093.05	Glu	1	3484.26	56.3605	5547	5.00075e-05
SPAC1093.06c	Glu	1	1176.49	3.33729	1873	2.96111e-06
SPAC1093.07	Glu	1	19.4721	2.93447	31	2.60369e-06
SPAC10F6.01c	Glu	1	22855.9	184.605	36387	0.000163796
SPAC10F6.02c	Glu	1	2737.41	27.8784	4358	2.47359e-05
SPAC10F6.03c	Glu	1	18251.1	361.54	29056	0.000320787
SPAC10F6.04	Glu	1	929.01	31.421	1479	2.78792e-05
SPAC10F6.05c	Glu	1	1743.07	91.017	2775	8.07576e-05
SPAC10F6.06	Glu	1	28499.7	1315.11	45372	0.00116687
SPAC10F6.07c	Glu	1	513.185	32.3262	817	2.86824e-05
SPAC10F6.08c	Glu	1	629.39	21.9097	1002	1.944e-05
SPAC10F6.09c	Glu	1	3222.33	32.1029	5130	2.84842e-05
SPAC10F6.10	Glu	1	1844.83	44.1031	2937	3.91318e-05
SPAC10F6.11c	Glu	1	2016.94	58.2824	3211	5.17128e-05
SPAC10F6.12c	Glu	1	1305.89	65.5995	2079	5.82051e-05
SPAC10F6.13c	Glu	1	21168.7	614.686	33701	0.000545399
SPAC10F6.14c	Glu	1	2430.25	53.9794	3869	4.78949e-05
SPAC10F6.15	Glu	1	136.305	3.74771	217	3.32527e-06
SPAC10F6.16	Glu	1	1600.48	136.102	2548	0.000120761
SPAC10F6.17c	Glu	1	2015.68	53.9267	3209	4.78481e-05
SPAC110.01	Glu	1	3781.37	43.9634	6020	3.90078e-05
SPAC110.02	Glu	1	2726.73	26.9176	4341	2.38835e-05
SPAC110.03	Glu	1	4937.76	304.59	7861	0.000270256
SPAC110.04c	Glu	1	38799.8	640.674	61770	0.000568457
SPAC110.06	Glu	1	46.4819	17.8511	74	1.58389e-05
SPAC1142.01	Glu	1	1848.6	33.498	2943	2.97221e-05
SPAC1142.02c	Glu	1	5937.75	222.299	9453	0.000197241
SPAC1142.03c	Glu	1	1514.43	24.9375	2411	2.21266e-05
SPAC1142.04	Glu	1	4911.38	82.5871	7819	7.32779e-05
SPAC1142.05	Glu	1	612.43	41.9035	975	3.71801e-05
SPAC1142.06	Glu	1	5087.88	183.555	8100	0.000162864
SPAC1142.07c	Glu	1	1594.83	85.1437	2539	7.55463e-05
SPAC1142.08	Glu	1	2731.13	43.703	4348	3.87768e-05
SPAC1142.09	Glu	1	44.5975	4.57715	71	4.06121e-06
SPAC11D3.01c	Glu	1	782.027	116.379	1245	0.000103261
SPAC11D3.02c	Glu	1	2650.72	208.992	4220	0.000185435
SPAC11D3.03c	Glu	1	79.1449	3.10973	126	2.7592e-06
SPAC11D3.04c	Glu	1	526.376	47.8374	838	4.24451e-05
SPAC11D3.05	Glu	1	2646.96	57.6105	4214	5.11167e-05
SPAC11D3.06	Glu	1	711.676	18.5806	1133	1.64862e-05
SPAC11D3.07c	Glu	1	760.67	14.1944	1211	1.25944e-05
SPAC11D3.08c	Glu	1	1670.84	36.1014	2660	3.20321e-05
SPAC11D3.09	Glu	1	1207.9	36.4063	1923	3.23026e-05
SPAC11D3.10	Glu	1	744.338	20.3715	1185	1.80752e-05
SPAC11D3.11c	Glu	1	520.723	17.3167	829	1.53648e-05
SPAC11D3.13	Glu	1	855.518	45.6738	1362	4.05254e-05
SPAC11D3.14c	Glu	1	2028.24	19.1491	3229	1.69906e-05
SPAC11D3.15	Glu	1	1592.32	14.3833	2535	1.2762e-05
SPAC11D3.16c	Glu	1	564.692	50.9308	899	4.51899e-05
SPAC11D3.17	Glu	1	274.494	5.57671	437	4.94811e-06
SPAC11D3.18c	Glu	1	226.756	5.41005	361	4.80023e-06
SPAC11D3.19	Glu	1	60.3008	9.20388	96	8.16642e-06
SPAC11D3.20	Glu	1	15.7033	6.44669	25	5.72002e-06
SPAC11E3.01c	Glu	1	4799.57	44.3294	7641	3.93326e-05
SPAC11E3.02c	Glu	1	3129.99	30.0999	4983	2.6707e-05
SPAC11E3.03	Glu	1	547.733	24.8891	872	2.20836e-05
SPAC11E3.04c	Glu	1	2642.56	211.145	4207	0.000187345
SPAC11E3.05	Glu	1	1741.81	15.6623	2773	1.38969e-05
SPAC11E3.06	Glu	1	692.203	20.654	1102	1.83258e-05
SPAC11E3.07	Glu	1	6265.01	327.137	9974	0.000290262
SPAC11E3.08c	Glu	1	413.312	9.40846	658	8.34794e-06
SPAC11E3.09	Glu	1	1219.21	47.747	1941	4.2365e-05
SPAC11E3.10	Glu	1	1675.86	122.403	2668	0.000108606
SPAC11E3.11c	Glu	1	1959.15	24.7342	3119	2.19462e-05
SPAC11E3.12	Glu	1	351.755	25.6918	560	2.27958e-05
SPAC11E3.13c	Glu	1	5039.52	117.411	8023	0.000104177
SPAC11E3.14	Glu	1	3953.47	79.9109	6294	7.09033e-05
SPAC11E3.15	Glu	1	53550.9	5402.9	85254	0.00479389
SPAC11G7.01	Glu	1	2222.34	49.2695	3538	4.37158e-05
SPAC11G7.02	Glu	1	10511.8	162.952	16735	0.000144584
SPAC11G7.03	Glu	1	6638.75	221.391	10569	0.000196436
SPAC11G7.04	Glu	1	59043.3	5449.08	93998	0.00483486
SPAC11G7.05c	Glu	1	1055.26	39.3834	1680	3.49441e-05
SPAC11G7.06c	Glu	1	310.298	8.57125	494	7.6051e-06
SPAC11H11.01	Glu	1	749.364	18.2816	1193	1.62209e-05
SPAC11H11.02c	Glu	1	312.182	14.0251	497	1.24442e-05
SPAC11H11.03c	Glu	1	613.059	35.2593	976	3.12849e-05
SPAC11H11.04	Glu	1	434.669	14.8277	692	1.31564e-05
SPAC11H11.05c	Glu	1	106.783	21.1881	170	1.87998e-05
SPAC11H11.06	Glu	1	9327.16	283.998	14849	0.000251986
SPAC1250.01	Glu	1	3245.57	32.1997	5167	2.85701e-05
SPAC1250.02	Glu	1	148.24	9.85947	236	8.74811e-06
SPAC1250.03	Glu	1	882.528	67.3513	1405	5.97595e-05
SPAC1250.04c	Glu	1	180.903	19.7588	288	1.75316e-05
SPAC1250.05	Glu	1	3498.7	352.994	5570	0.000313205
SPAC1250.07	Glu	1	1399.48	137.697	2228	0.000122176
SPAC1296.01c	Glu	1	4599.82	100.852	7323	8.94838e-05
SPAC1296.02	Glu	1	9082.19	655.313	14459	0.000581446
SPAC1296.03c	Glu	1	586.049	13.7345	933	1.21863e-05
SPAC1296.04	Glu	1	1030.77	49.2837	1641	4.37285e-05
SPAC1296.05c	Glu	1	1028.88	47.2943	1638	4.19633e-05
SPAC1296.06	Glu	1	2160.78	43.9741	3440	3.90173e-05
SPAC12B10.01c	Glu	1	6349.8	45.8718	10109	4.07011e-05
SPAC12B10.02c	Glu	1	2751.23	138.789	4380	0.000123145
SPAC12B10.03	Glu	1	765.067	16.7434	1218	1.48561e-05
SPAC12B10.04	Glu	1	1148.23	33.8368	1828	3.00227e-05
SPAC12B10.05	Glu	1	1757.52	42.9648	2798	3.81218e-05
SPAC12B10.06c	Glu	1	1512.55	128.624	2408	0.000114126
SPAC12B10.07	Glu	1	3337.27	154.597	5313	0.000137171
SPAC12B10.08c	Glu	1	408.287	10.6363	650	9.4374e-06
SPAC12B10.09	Glu	1	831.021	37.0547	1323	3.28779e-05
SPAC12B10.10	Glu	1	135.677	3.84591	216	3.4124e-06
SPAC12B10.11	Glu	1	826.624	17.2351	1316	1.52924e-05
SPAC12B10.12c	Glu	1	1965.43	36.6184	3129	3.24908e-05
SPAC12B10.13	Glu	1	1270.09	62.742	2022	5.56698e-05
SPAC12B10.14c	Glu	1	741.826	13.2608	1181	1.17661e-05
SPAC12B10.15c	Glu	1	62.8134	5.05281	100	4.48326e-06
SPAC12B10.16c	Glu	1	2167.06	50.5875	3450	4.48853e-05
SPAC12G12.01c	Glu	1	1934.02	25.4142	3079	2.25495e-05
SPAC12G12.02	Glu	1	1402.62	90.7539	2233	8.05241e-05
SPAC12G12.03	Glu	1	1000.62	20.6459	1593	1.83187e-05
SPAC12G12.04	Glu	1	39428	805.152	62770	0.000714396
SPAC12G12.05c	Glu	1	898.231	65.2059	1430	5.78559e-05
SPAC12G12.06c	Glu	1	3364.91	110.056	5357	9.76507e-05
SPAC12G12.07c	Glu	1	6224.81	179.44	9910	0.000159213
SPAC12G12.08	Glu	1	813.433	45.2533	1295	4.01524e-05
SPAC12G12.09	Glu	1	478.01	5.81889	761	5.16299e-06
SPAC12G12.10	Glu	1	1947.84	55.0826	3101	4.88737e-05
SPAC12G12.11c	Glu	1	1993.07	64.8311	3173	5.75234e-05
SPAC12G12.12	Glu	1	3649.46	133.686	5810	0.000118617
SPAC12G12.13c	Glu	1	3298.33	57.3252	5251	5.08635e-05
SPAC12G12.14c	Glu	1	854.89	19.9564	1361	1.77069e-05
SPAC12G12.15	Glu	1	1526.99	38.4342	2431	3.41019e-05
SPAC12G12.16c	Glu	1	543.336	13.0153	865	1.15482e-05
SPAC12G12.17	Glu	1	491.201	99.1172	782	8.79448e-05
SPAC1327.01c	Glu	1	3021.32	36.7791	4810	3.26333e-05
SPAC139.01c	Glu	1	3886.89	57.6274	6188	5.11317e-05
SPAC139.02c	Glu	1	4346.69	161.211	6920	0.00014304
SPAC139.03	Glu	1	1477.37	28.0968	2352	2.49298e-05
SPAC139.04c	Glu	1	2526.98	69.3194	4023	6.15057e-05
SPAC139.05	Glu	1	440.95	10.6269	702	9.42899e-06
SPAC139.06	Glu	1	1304.63	40.9819	2077	3.63624e-05
SPAC1399.01c	Glu	1	790.192	15.6271	1258	1.38656e-05
SPAC1399.02	Glu	1	663.937	13.3973	1057	1.18872e-05
SPAC1399.03	Glu	1	2522.59	51.6018	4016	4.57853e-05
SPAC1399.04c	Glu	1	885.04	47.6775	1409	4.23033e-05
SPAC1399.05c	Glu	1	653.887	14.6882	1041	1.30326e-05
SPAC1399.06	Glu	1	28.8942	2.75196	46	2.44176e-06
SPAC13A11.01c	Glu	1	4087.89	62.5551	6508	5.55039e-05
SPAC13A11.02c	Glu	1	11361.7	272.711	18088	0.000241971
SPAC13A11.03	Glu	1	232.409	13.1134	370	1.16352e-05
SPAC13A11.04c	Glu	1	908.91	24.0464	1447	2.13359e-05
SPAC13A11.05	Glu	1	7651.93	177.235	12182	0.000157257
SPAC13A11.06	Glu	1	364.946	7.59582	581	6.73962e-06
SPAC13C5.01c	Glu	1	6498.04	310.689	10345	0.000275668
SPAC13C5.02	Glu	1	1698.47	49.0799	2704	4.35476e-05
SPAC13C5.03	Glu	1	599.24	13.1143	954	1.1636e-05
SPAC13C5.04	Glu	1	1958.52	93.6421	3118	8.30868e-05
SPAC13C5.05c	Glu	1	2170.83	49.7967	3456	4.41836e-05
SPAC13C5.06c	Glu	1	1298.35	86.839	2067	7.70505e-05
SPAC13C5.07	Glu	1	1170.21	21.4335	1863	1.90176e-05
SPAC13D1.01c	Glu	1	0	0	0	0
SPAC13D6.01	Glu	1	702.882	19.3705	1119	1.71871e-05
SPAC13D6.02c	Glu	1	4487.39	296.8	7144	0.000263344
SPAC13D6.03c	Glu	1	565.949	29.4228	901	2.61063e-05
SPAC13D6.04c	Glu	1	1480.51	33.6374	2357	2.98458e-05
SPAC13D6.05	Glu	1	1971.08	99.8572	3138	8.86013e-05
SPAC13F5.01c	Glu	1	702.254	8.87535	1118	7.87492e-06
SPAC13F5.02c	Glu	1	2508.14	75.7875	3993	6.72447e-05
SPAC13F5.03c	Glu	1	3067.18	80.9664	4883	7.18398e-05
SPAC13F5.04c	Glu	1	118.717	3.62403	189	3.21553e-06
SPAC13F5.05	Glu	1	817.83	26.7488	1302	2.37337e-05
SPAC13F5.06c	Glu	1	1988.04	29.1482	3165	2.58626e-05
SPAC13F5.07c	Glu	1	97.9889	7.02766	156	6.23551e-06
SPAC13G6.01c	Glu	1	2510.02	26.3516	3996	2.33812e-05
SPAC13G6.02c	Glu	1	62476.7	2939.95	99464	0.00260856
SPAC13G6.03	Glu	1	2621.83	41.1249	4174	3.64893e-05
SPAC13G6.04	Glu	1	2457.89	332.523	3913	0.000295041
SPAC13G6.05c	Glu	1	915.819	42.9258	1458	3.80872e-05
SPAC13G6.06c	Glu	1	15823.9	182.548	25192	0.000161971
SPAC13G6.07c	Glu	1	58464.8	2900.18	93077	0.00257328
SPAC13G6.08	Glu	1	53.3914	1.1859	85	1.05223e-06
SPAC13G6.09	Glu	1	1141.95	49.4374	1818	4.38648e-05
SPAC13G6.10c	Glu	1	13131.1	294.408	20905	0.000261223
SPAC13G6.11c	Glu	1	3606.74	106.024	5742	9.40726e-05
SPAC13G6.12c	Glu	1	1679	23.2432	2673	2.06232e-05
SPAC13G6.13	Glu	1	2.51253	0.257867	4	2.28801e-07
SPAC13G6.14	Glu	1	2111.16	119.119	3361	0.000105692
SPAC13G6.15c	Glu	1	537.054	38.9867	855	3.45921e-05
SPAC13G7.01c	Glu	1	5428.33	89.51	8642	7.94204e-05
SPAC13G7.02c	Glu	1	40744.5	752.059	64866	0.000667287
SPAC13G7.03	Glu	1	773.233	32.995	1231	2.92758e-05
SPAC13G7.04c	Glu	1	5186.5	81.5682	8257	7.23738e-05
SPAC13G7.05	Glu	1	2264.42	50.1092	3605	4.44609e-05
SPAC13G7.06	Glu	1	2210.4	98.5604	3519	8.74507e-05
SPAC13G7.07	Glu	1	481.15	17.7896	766	1.57844e-05
SPAC13G7.08c	Glu	1	3371.19	89.7881	5367	7.96671e-05
SPAC13G7.09c	Glu	1	413.312	36.1811	658	3.21027e-05
SPAC13G7.10	Glu	1	708.535	21.5738	1128	1.9142e-05
SPAC13G7.11	Glu	1	1837.29	81.0134	2925	7.18815e-05
SPAC13G7.12c	Glu	1	1497.47	39.0108	2384	3.46135e-05
SPAC13G7.13c	Glu	1	876.247	19.5356	1395	1.73336e-05
SPAC140.01	Glu	1	12197.1	526.126	19418	0.000466821
SPAC140.02	Glu	1	18049.4	428.912	28735	0.000380565
SPAC140.03	Glu	1	1412.67	42.0459	2249	3.73065e-05
SPAC140.04	Glu	1	1073.48	43.1762	1709	3.83094e-05
SPAC1420.01c	Glu	1	5023.19	102.931	7997	9.13285e-05
SPAC1420.02c	Glu	1	9836.57	214.091	15660	0.000189959
SPAC1420.03	Glu	1	832.905	22.3334	1326	1.9816e-05
SPAC1420.04c	Glu	1	51.507	0.813274	82	7.21602e-07
SPAC144.01	Glu	1	1248.73	131.563	1988	0.000116733
SPAC144.02	Glu	1	407.031	19.3834	648	1.71985e-05
SPAC144.03	Glu	1	18315.8	501.277	29159	0.000444773
SPAC144.04c	Glu	1	12025	330.628	19144	0.000293359
SPAC144.05	Glu	1	1081.02	9.35313	1721	8.29884e-06
SPAC144.06	Glu	1	1194.71	17.2197	1902	1.52787e-05
SPAC144.07c	Glu	1	532.657	20.068	848	1.78059e-05
SPAC144.08	Glu	1	438.437	23.0963	698	2.04928e-05
SPAC144.09c	Glu	1	841.071	26.702	1339	2.36922e-05
SPAC144.10c	Glu	1	2015.68	52.1683	3209	4.62879e-05
SPAC144.11	Glu	1	22169.4	1725.06	35294	0.00153061
SPAC144.12	Glu	1	6297.67	272.64	10026	0.000241908
SPAC144.13c	Glu	1	136.933	2.92682	218	2.59691e-06
SPAC144.14	Glu	1	827.88	19.2504	1318	1.70805e-05
SPAC144.15c	Glu	1	721.726	12.2399	1149	1.08602e-05
SPAC144.16	Glu	1	1065.94	70.5024	1697	6.25554e-05
SPAC144.17c	Glu	1	1713.55	45.3342	2728	4.02242e-05
SPAC144.18	Glu	1	3769.43	129.701	6001	0.000115081
SPAC1486.01	Glu	1	5397.55	293.424	8593	0.000260349
SPAC1486.02c	Glu	1	1670.21	53.3094	2659	4.73004e-05
SPAC1486.03c	Glu	1	2913.28	43.4633	4638	3.85641e-05
SPAC1486.04c	Glu	1	4426.46	30.4969	7047	2.70592e-05
SPAC1486.05	Glu	1	12325.9	81.1636	19623	7.20149e-05
SPAC1486.06	Glu	1	2496.83	72.3252	3975	6.41727e-05
SPAC1486.07c	Glu	1	837.93	68.799	1334	6.1044e-05
SPAC1486.08	Glu	1	670.219	69.9929	1067	6.21033e-05
SPAC1486.09	Glu	1	1832.27	56.0766	2917	4.97556e-05
SPAC1486.10	Glu	1	2334.14	35.8103	3716	3.17738e-05
SPAC1486.11	Glu	1	442.834	50.2105	705	4.45507e-05
SPAC14C4.01c	Glu	1	336.68	16.3604	536	1.45162e-05
SPAC14C4.02c	Glu	1	1820.33	20.1223	2898	1.78541e-05
SPAC14C4.03	Glu	1	148.868	3.97382	237	3.52589e-06
SPAC14C4.04	Glu	1	3200.34	142.169	5095	0.000126143
SPAC14C4.05c	Glu	1	2578.49	36.3288	4105	3.22338e-05
SPAC14C4.06c	Glu	1	1035.16	40.013	1648	3.55027e-05
SPAC14C4.07	Glu	1	3212.9	59.3035	5115	5.26188e-05
SPAC14C4.08	Glu	1	61.5571	3.9401	98	3.49598e-06
SPAC14C4.09	Glu	1	1542.7	43.2149	2456	3.83438e-05
SPAC14C4.10c	Glu	1	532.657	19.2166	848	1.70505e-05
SPAC14C4.11	Glu	1	10619.9	172.018	16907	0.000152628
SPAC14C4.12c	Glu	1	462.306	18.4695	736	1.63877e-05
SPAC14C4.13	Glu	1	483.035	9.47397	769	8.40607e-06
SPAC14C4.14	Glu	1	25264.8	560.124	40222	0.000496986
SPAC14C4.15c	Glu	1	1309.66	18.2576	2085	1.61996e-05
SPAC14C4.16	Glu	1	70.9791	9.71301	113	8.61816e-06
SPAC1527.01	Glu	1	1650.11	8.19229	2627	7.26886e-06
SPAC1527.02	Glu	1	1312.8	77.373	2090	6.86515e-05
SPAC1527.03	Glu	1	1094.84	27.3832	1743	2.42966e-05
SPAC1556.01c	Glu	1	2687.16	24.8768	4278	2.20727e-05
SPAC1556.02c	Glu	1	41194.9	763.925	65583	0.000677815
SPAC1556.03	Glu	1	1290.81	51.2254	2055	4.54512e-05
SPAC1556.04c	Glu	1	195.35	17.356	311	1.53996e-05
SPAC1556.05c	Glu	1	1659.53	176.404	2642	0.00015652
SPAC1556.06	Glu	1	342.961	5.25492	546	4.66259e-06
SPAC1556.07	Glu	1	13114.2	605.151	20878	0.000536938
SPAC1556.08c	Glu	1	6526.31	231.934	10390	0.000205791
SPAC1565.01	Glu	1	2108.02	103.279	3356	9.1637e-05
SPAC1565.02c	Glu	1	1081.02	34.3197	1721	3.04512e-05
SPAC1565.03	Glu	1	67.2103	4.79139	107	4.25131e-06
SPAC1565.04c	Glu	1	1722.34	77.3777	2742	6.86557e-05
SPAC1565.05	Glu	1	1827.24	28.1059	2909	2.49378e-05
SPAC1565.06c	Glu	1	1647.59	98.5689	2623	8.74582e-05
SPAC1565.07c	Glu	1	1033.28	10.075	1645	8.93934e-06
SPAC1565.08	Glu	1	57807.8	843.409	92031	0.00074834
SPAC15A10.01	Glu	1	2716.68	46.6038	4325	4.13506e-05
SPAC15A10.02	Glu	1	2048.34	54.0715	3261	4.79766e-05
SPAC15A10.03c	Glu	1	2215.43	30.9208	3527	2.74354e-05
SPAC15A10.04c	Glu	1	7413.86	191.88	11803	0.000170251
SPAC15A10.05c	Glu	1	1106.14	54.1935	1761	4.80849e-05
SPAC15A10.06	Glu	1	2812.78	58.9563	4478	5.23107e-05
SPAC15A10.07	Glu	1	619.34	45.236	986	4.0137e-05
SPAC15A10.08	Glu	1	2807.13	53.7297	4469	4.76733e-05
SPAC15A10.09c	Glu	1	1863.04	76.7481	2966	6.80971e-05
SPAC15A10.10	Glu	1	565.32	9.60106	900	8.51882e-06
SPAC15A10.11	Glu	1	6043.9	35.0486	9622	3.10979e-05
SPAC15A10.12c	Glu	1	608.662	48.6331	969	4.31512e-05
SPAC15A10.13	Glu	1	1485.54	27.7207	2365	2.45961e-05
SPAC15A10.15	Glu	1	1792.69	32.9362	2854	2.92236e-05
SPAC15A10.16	Glu	1	1728.62	14.8484	2752	1.31747e-05
SPAC15A10.17	Glu	1	1027	140.538	1635	0.000124696
SPAC15E1.02c	Glu	1	1602.37	128.032	2551	0.0001136
SPAC15E1.03	Glu	1	64121.8	7134.51	102083	0.00633031
SPAC15E1.04	Glu	1	5366.15	102.054	8543	9.05506e-05
SPAC15E1.05c	Glu	1	1869.95	60.8264	2977	5.39701e-05
SPAC15E1.06	Glu	1	1833.52	116.11	2919	0.000103022
SPAC15E1.07c	Glu	1	3.7688	0.259358	6	2.30123e-07
SPAC15E1.08	Glu	1	1548.35	103.56	2465	9.18866e-05
SPAC15E1.09	Glu	1	984.286	105.57	1567	9.36701e-05
SPAC15E1.10	Glu	1	864.312	38.684	1376	3.43235e-05
SPAC15F9.01c	Glu	1	27.6379	1.44315	44	1.28048e-06
SPAC15F9.02	Glu	1	1454.76	50.9394	2316	4.51975e-05
SPAC15F9.03c	Glu	1	5734.86	550.609	9130	0.000488545
SPAC16.01	Glu	1	592.33	35.0841	943	3.11294e-05
SPAC16.02c	Glu	1	15698.9	510.66	24993	0.000453098
SPAC16.03c	Glu	1	1538.93	54.2056	2450	4.80955e-05
SPAC16.04	Glu	1	2964.79	57.1147	4720	5.06767e-05
SPAC16.05c	Glu	1	1986.16	53.3768	3162	4.73602e-05
SPAC1610.01	Glu	1	530.145	28.9521	844	2.56886e-05
SPAC1610.02c	Glu	1	2156.38	101.073	3433	8.96799e-05
SPAC1610.03c	Glu	1	19.4721	0.326052	31	2.89299e-07
SPAC1610.04	Glu	1	2096.71	47.3664	3338	4.20272e-05
SPAC1635.01	Glu	1	21857.8	919.522	34798	0.000815874
SPAC1639.01c	Glu	1	6299.55	204.914	10029	0.000181816
SPAC1639.02c	Glu	1	1802.74	24.2238	2870	2.14933e-05
SPAC167.01	Glu	1	2510.65	27.8567	3997	2.47167e-05
SPAC167.02	Glu	1	612.43	23.3692	975	2.07351e-05
SPAC167.03c	Glu	1	4079.1	74.7125	6494	6.62909e-05
SPAC167.04	Glu	1	1837.92	104.196	2926	9.24507e-05
SPAC167.05	Glu	1	3274.46	64.7569	5213	5.74575e-05
SPAC167.06c	Glu	1	676.5	66.0162	1077	5.85748e-05
SPAC167.07c	Glu	1	1808.4	20.9025	2879	1.85464e-05
SPAC167.08	Glu	1	4.39694	0.0392407	7	3.48175e-08
SPAC167.09	Glu	1	650.118	43.2396	1035	3.83656e-05
SPAC1687.01	Glu	1	968.582	91.5184	1542	8.12024e-05
SPAC1687.02	Glu	1	492.457	21.5547	784	1.9125e-05
SPAC1687.03c	Glu	1	2494.32	86.5765	3971	7.68176e-05
SPAC1687.04	Glu	1	535.17	12.692	852	1.12614e-05
SPAC1687.05	Glu	1	2035.78	33.2922	3241	2.95395e-05
SPAC1687.06c	Glu	1	23063.8	2033.95	36718	0.00180468
SPAC1687.07	Glu	1	462.306	44.0314	736	3.90682e-05
SPAC1687.08	Glu	1	509.416	62.5235	811	5.54759e-05
SPAC1687.09	Glu	1	5452.83	47.0419	8681	4.17394e-05
SPAC1687.10	Glu	1	3050.22	54.8549	4856	4.86716e-05
SPAC1687.11	Glu	1	7238.61	107.32	11524	9.52232e-05
SPAC1687.12c	Glu	1	2487.41	108.474	3960	9.62471e-05
SPAC1687.13c	Glu	1	1446.59	57.4073	2303	5.09364e-05
SPAC1687.14c	Glu	1	292.082	45.1603	465	4.00698e-05
SPAC1687.15	Glu	1	3559.63	109.223	5667	9.69118e-05
SPAC1687.16c	Glu	1	4563.39	180.494	7265	0.000160149
SPAC1687.17c	Glu	1	1211.67	75.5255	1929	6.70122e-05
SPAC1687.18c	Glu	1	1973.6	41.9578	3142	3.72283e-05
SPAC1687.19c	Glu	1	2749.34	80.8195	4377	7.17095e-05
SPAC1687.20c	Glu	1	284.545	5.03359	453	4.4662e-06
SPAC1687.21	Glu	1	2998.08	169.968	4773	0.000150809
SPAC1687.22c	Glu	1	2265.05	36.7889	3606	3.2642e-05
SPAC1687.23c	Glu	1	6.28134	0.712205	10	6.31926e-07
SPAC16A10.01	Glu	1	1526.36	21.8675	2430	1.94026e-05
SPAC16A10.02	Glu	1	494.341	42.9585	787	3.81162e-05
SPAC16A10.03c	Glu	1	631.274	8.86267	1005	7.86367e-06
SPAC16A10.04	Glu	1	358.036	20.8948	570	1.85396e-05
SPAC16A10.05c	Glu	1	219.847	28.7621	350	2.55201e-05
SPAC16A10.06c	Glu	1	967.954	45.9117	1541	4.07365e-05
SPAC16A10.07c	Glu	1	2086.66	37.4133	3322	3.31961e-05
SPAC16A10.08c	Glu	1	466.075	19.4014	742	1.72144e-05
SPAC16C9.01c	Glu	1	2153.87	70.8359	3429	6.28513e-05
SPAC16C9.02c	Glu	1	4244.93	164.082	6758	0.000145587
SPAC16C9.03	Glu	1	4089.78	97.5757	6511	8.6577e-05
SPAC16C9.04c	Glu	1	2246.21	54.5753	3576	4.84235e-05
SPAC16C9.05	Glu	1	1790.18	52.6241	2850	4.66923e-05
SPAC16C9.06c	Glu	1	3906.36	50.2232	6219	4.4562e-05
SPAC16C9.07	Glu	1	1560.28	22.1932	2484	1.96916e-05
SPAC16E8.01	Glu	1	4542.66	38.0591	7232	3.37691e-05
SPAC16E8.02	Glu	1	618.712	33.0313	985	2.9308e-05
SPAC16E8.03	Glu	1	572.858	60.8936	912	5.40296e-05
SPAC16E8.04c	Glu	1	820.971	38.7855	1307	3.44136e-05
SPAC16E8.05c	Glu	1	200.375	11.3597	319	1.00792e-05
SPAC16E8.06c	Glu	1	4351.08	117.998	6927	0.000104697
SPAC16E8.07c	Glu	1	10719.7	153.392	17066	0.000136102
SPAC16E8.08	Glu	1	704.766	31.0759	1122	2.7573e-05
SPAC16E8.09	Glu	1	1732.39	23.6251	2758	2.09621e-05
SPAC16E8.10c	Glu	1	1703.5	78.0029	2712	6.92104e-05
SPAC16E8.11c	Glu	1	1412.67	31.4951	2249	2.7945e-05
SPAC16E8.12c	Glu	1	867.453	48.7138	1381	4.32228e-05
SPAC16E8.13	Glu	1	1857.39	40.352	2957	3.58035e-05
SPAC16E8.14c	Glu	1	944.713	51.1234	1504	4.53608e-05
SPAC16E8.15	Glu	1	7190.88	390.913	11448	0.000346849
SPAC16E8.16	Glu	1	1040.19	36.3162	1656	3.22226e-05
SPAC16E8.17c	Glu	1	2037.67	73.0697	3244	6.48333e-05
SPAC16E8.18	Glu	1	373.111	41.1299	594	3.64937e-05
SPAC16E8.18c	Glu	1	741.198	56.2052	1180	4.98698e-05
SPAC1705.02	Glu	1	423.99	78.8712	675	6.99808e-05
SPAC1705.03c	Glu	1	36911	1041.32	58763	0.000923946
SPAC1751.01c	Glu	1	1192.2	19.6859	1898	1.74669e-05
SPAC1751.02c	Glu	1	886.297	112.252	1411	9.95989e-05
SPAC1751.03	Glu	1	18115.4	535.161	28840	0.000474838
SPAC1751.04	Glu	1	1027.63	117.637	1636	0.000104377
SPAC1782.01	Glu	1	4383.75	31.0655	6979	2.75638e-05
SPAC1782.02c	Glu	1	982.401	72.1965	1564	6.40585e-05
SPAC1782.03	Glu	1	977.376	32.6854	1556	2.90011e-05
SPAC1782.04	Glu	1	1463.55	99.0006	2330	8.78412e-05
SPAC1782.05	Glu	1	1434.66	48.3856	2284	4.29316e-05
SPAC1782.06c	Glu	1	5379.97	226.327	8565	0.000200815
SPAC1782.07	Glu	1	9296.38	1190.07	14800	0.00105593
SPAC1782.08c	Glu	1	2719.82	59.8529	4330	5.31063e-05
SPAC1782.09c	Glu	1	1115.57	24.6863	1776	2.19036e-05
SPAC1782.10c	Glu	1	4543.29	348.965	7233	0.000309629
SPAC1782.11	Glu	1	7817.12	458.451	12445	0.000406775
SPAC1782.12c	Glu	1	611.174	61.1449	973	5.42527e-05
SPAC1783.01	Glu	1	2504.37	51.0538	3987	4.5299e-05
SPAC1783.02c	Glu	1	1314.68	51.9993	2093	4.61379e-05
SPAC1783.03	Glu	1	217.962	7.37193	347	6.54097e-06
SPAC1783.04c	Glu	1	2307.14	66.0271	3673	5.85845e-05
SPAC1783.05	Glu	1	3846.69	33.3306	6124	2.95736e-05
SPAC1783.06c	Glu	1	402.006	35.9851	640	3.19289e-05
SPAC1783.07c	Glu	1	11627.4	250.322	18511	0.000222106
SPAC1783.08c	Glu	1	44732.5	2636.42	71215	0.00233924
SPAC1786.01c	Glu	1	6653.19	125.529	10592	0.000111379
SPAC1786.02	Glu	1	3739.91	69.0309	5954	6.12497e-05
SPAC1786.03	Glu	1	1228.63	24.2978	1956	2.15589e-05
SPAC1786.04	Glu	1	2.51253	0.267077	4	2.36972e-07
SPAC17A2.01	Glu	1	6354.83	143.561	10117	0.000127379
SPAC17A2.02c	Glu	1	6744.9	275.947	10738	0.000244842
SPAC17A2.03c	Glu	1	4795.17	165.954	7634	0.000147248
SPAC17A2.04c	Glu	1	1113.68	36.9325	1773	3.27695e-05
SPAC17A2.05	Glu	1	3045.19	70.5333	4848	6.25828e-05
SPAC17A2.06c	Glu	1	3322.2	31.0699	5289	2.75677e-05
SPAC17A2.07c	Glu	1	101.13	6.76395	161	6.00152e-06
SPAC17A2.08c	Glu	1	1450.36	47.6991	2309	4.23224e-05
SPAC17A2.09c	Glu	1	4078.47	76.7072	6493	6.80608e-05
SPAC17A2.10c	Glu	1	6.28134	0.32373	10	2.87239e-07
SPAC17A2.11	Glu	1	9.42201	0.514552	15	4.56552e-07
SPAC17A2.12	Glu	1	2307.76	30.5955	3674	2.71468e-05
SPAC17A2.13c	Glu	1	18652.4	819.424	29695	0.000727058
SPAC17A2.14	Glu	1	2690.92	51.8389	4284	4.59956e-05
SPAC17A5.01	Glu	1	976.748	12.2535	1555	1.08722e-05
SPAC17A5.02c	Glu	1	1265.06	31.4426	2014	2.78984e-05
SPAC17A5.03	Glu	1	25945.7	794.069	41306	0.000704561
SPAC17A5.04c	Glu	1	1096.72	25.452	1746	2.2583e-05
SPAC17A5.05c	Glu	1	199.118	9.55877	317	8.48131e-06
SPAC17A5.06	Glu	1	2596.08	38.3941	4133	3.40663e-05
SPAC17A5.07c	Glu	1	1369.96	25.524	2181	2.2647e-05
SPAC17A5.08	Glu	1	3547.7	200.174	5648	0.00017761
SPAC17A5.09c	Glu	1	1627.49	62.3019	2591	5.52793e-05
SPAC17A5.10	Glu	1	390.699	20.6729	622	1.83427e-05
SPAC17A5.11	Glu	1	192.837	6.63524	307	5.88732e-06
SPAC17A5.12	Glu	1	607.405	10.3601	967	9.19234e-06
SPAC17A5.13	Glu	1	1410.79	71.1692	2246	6.3147e-05
SPAC17A5.14	Glu	1	8807.06	78.8948	14021	7.00018e-05
SPAC17A5.15c	Glu	1	17438.2	289.552	27762	0.000256913
SPAC17A5.16	Glu	1	1258.15	16.1758	2003	1.43524e-05
SPAC17A5.18c	Glu	1	48.9944	3.86289	78	3.42746e-06
SPAC17A5.19	Glu	1	32.0348	4.10092	51	3.63867e-06
SPAC17C9.01c	Glu	1	1297.1	23.1868	2065	2.05732e-05
SPAC17C9.02c	Glu	1	304.017	13.9746	484	1.23994e-05
SPAC17C9.03	Glu	1	32234.6	273.336	51318	0.000242526
SPAC17C9.05c	Glu	1	449.116	19.5142	715	1.73145e-05
SPAC17C9.06	Glu	1	2415.8	60.4222	3846	5.36114e-05
SPAC17C9.07	Glu	1	2136.28	50.6638	3401	4.49529e-05
SPAC17C9.08	Glu	1	1866.19	68.7851	2971	6.10317e-05
SPAC17C9.09c	Glu	1	2976.73	369.156	4739	0.000327545
SPAC17C9.10	Glu	1	4062.14	177.799	6467	0.000157757
SPAC17C9.11c	Glu	1	4309.63	212.895	6861	0.000188897
SPAC17C9.12	Glu	1	6773.17	251.99	10783	0.000223586
SPAC17C9.13c	Glu	1	2338.54	105.86	3723	9.39274e-05
SPAC17C9.14	Glu	1	1938.42	99.0454	3086	8.7881e-05
SPAC17C9.15c	Glu	1	462.306	57.936	736	5.14055e-05
SPAC17C9.16c	Glu	1	2302.74	51.5318	3666	4.57231e-05
SPAC17D4.01	Glu	1	14262.4	549.511	22706	0.00048757
SPAC17D4.02	Glu	1	1589.18	29.6083	2530	2.62709e-05
SPAC17D4.03c	Glu	1	1819.7	29.5555	2897	2.6224e-05
SPAC17D4.04	Glu	1	1979.25	34.1998	3151	3.03448e-05
SPAC17G6.02c	Glu	1	0	0	0	0
SPAC17G6.03	Glu	1	2306.51	43.1758	3672	3.8309e-05
SPAC17G6.04c	Glu	1	1716.69	53.3624	2733	4.73474e-05
SPAC17G6.05c	Glu	1	673.988	10.3403	1073	9.17473e-06
SPAC17G6.06	Glu	1	25796.2	2274.91	41068	0.00201848
SPAC17G6.07c	Glu	1	1648.22	87.9941	2624	7.80754e-05
SPAC17G6.08	Glu	1	810.293	17.9643	1290	1.59394e-05
SPAC17G6.09	Glu	1	2371.2	103.029	3775	9.14159e-05
SPAC17G6.10	Glu	1	2668.31	60.1652	4248	5.33833e-05
SPAC17G6.11c	Glu	1	3583.5	66.9747	5705	5.94253e-05
SPAC17G6.12	Glu	1	1630.64	25.2777	2596	2.24284e-05
SPAC17G6.13	Glu	1	17615.4	483.22	28044	0.000428751
SPAC17G6.14c	Glu	1	16599.7	454.311	26427	0.000403101
SPAC17G6.15c	Glu	1	4136.89	152.48	6586	0.000135293
SPAC17G6.16c	Glu	1	3138.16	49.2887	4996	4.37329e-05
SPAC17G6.17	Glu	1	567.205	16.7563	903	1.48675e-05
SPAC17G8.01c	Glu	1	2048.97	30.3405	3262	2.69205e-05
SPAC17G8.02	Glu	1	545.848	19.633	869	1.742e-05
SPAC17G8.03c	Glu	1	1153.25	68.6495	1836	6.09113e-05
SPAC17G8.04c	Glu	1	3632.5	282.655	5783	0.000250794
SPAC17G8.05	Glu	1	376.252	23.0898	599	2.04871e-05
SPAC17G8.06c	Glu	1	30901	614.17	49195	0.000544941
SPAC17G8.07	Glu	1	1874.98	102.396	2985	9.08538e-05
SPAC17G8.08c	Glu	1	4024.45	166.363	6407	0.000147611
SPAC17G8.09	Glu	1	168.34	15.0688	268	1.33702e-05
SPAC17G8.10c	Glu	1	836.046	37.1396	1331	3.29533e-05
SPAC17G8.11c	Glu	1	2010.66	67.052	3201	5.94939e-05
SPAC17G8.12	Glu	1	819.086	16.0123	1304	1.42074e-05
SPAC17G8.13c	Glu	1	1729.25	50.4592	2753	4.47715e-05
SPAC17G8.14c	Glu	1	4420.18	53.2091	7037	4.72114e-05
SPAC17G8.15	Glu	1	173.993	27.9926	277	2.48372e-05
SPAC17H9.01	Glu	1	652.631	6.45869	1039	5.73067e-06
SPAC17H9.02	Glu	1	2850.47	32.9155	4538	2.92053e-05
SPAC17H9.03c	Glu	1	749.992	38.6533	1194	3.42963e-05
SPAC17H9.04c	Glu	1	3706.62	72.9398	5901	6.47181e-05
SPAC17H9.05	Glu	1	4339.78	154.69	6909	0.000137254
SPAC17H9.06c	Glu	1	1032.02	20.4097	1643	1.81091e-05
SPAC17H9.07	Glu	1	1866.19	183.617	2971	0.000162919
SPAC17H9.08	Glu	1	899.488	32.7484	1432	2.9057e-05
SPAC17H9.09c	Glu	1	2116.18	114.518	3369	0.000101609
SPAC17H9.10c	Glu	1	2378.74	26.3931	3787	2.34181e-05
SPAC17H9.11	Glu	1	1809.03	151.67	2880	0.000134573
SPAC17H9.12c	Glu	1	3032.63	135.223	4828	0.000119981
SPAC17H9.13c	Glu	1	2531.38	74.7816	4030	6.63522e-05
SPAC17H9.14c	Glu	1	17657.5	583.94	28111	0.000518118
SPAC17H9.16	Glu	1	2802.73	230.121	4462	0.000204182
SPAC17H9.17c	Glu	1	961.045	30.8398	1530	2.73636e-05
SPAC17H9.18c	Glu	1	135.677	15.2385	216	1.35208e-05
SPAC17H9.19c	Glu	1	1934.65	46.9098	3080	4.16221e-05
SPAC17H9.20	Glu	1	650.747	8.04504	1036	7.1382e-06
SPAC1805.01c	Glu	1	2393.82	36.7258	3811	3.25861e-05
SPAC1805.02c	Glu	1	4974.19	232.233	7919	0.000206056
SPAC1805.03c	Glu	1	396.981	12.8081	632	1.13644e-05
SPAC1805.04	Glu	1	1761.29	18.0299	2804	1.59976e-05
SPAC1805.05	Glu	1	5506.22	148.985	8766	0.000132192
SPAC1805.06c	Glu	1	4387.51	158.288	6985	0.000140445
SPAC1805.07c	Glu	1	154.521	19.3645	246	1.71817e-05
SPAC1805.08	Glu	1	1523.22	161.915	2425	0.000143664
SPAC1805.09c	Glu	1	719.841	25.1319	1146	2.2299e-05
SPAC1805.10	Glu	1	843.584	19.0211	1343	1.68771e-05
SPAC1805.11c	Glu	1	40666	4034.53	64741	0.00357976
SPAC1805.12c	Glu	1	15421.3	1423.23	24551	0.0012628
SPAC1805.13	Glu	1	81500.4	7187.34	129750	0.00637718
SPAC1805.14	Glu	1	2815.3	73.9892	4482	6.56491e-05
SPAC1805.15c	Glu	1	979.261	17.3489	1559	1.53933e-05
SPAC1805.16c	Glu	1	1407.65	53.0334	2241	4.70555e-05
SPAC1805.17	Glu	1	4285.13	47.2808	6822	4.19513e-05
SPAC1805.18	Glu	1	479.894	59.5137	764	5.28053e-05
SPAC1834.01	Glu	1	6784.47	186.11	10801	0.000165131
SPAC1834.02	Glu	1	22328.3	168.886	35547	0.000149849
SPAC1834.03c	Glu	1	11830.9	1354.34	18835	0.00120168
SPAC1834.04	Glu	1	4849.82	421.451	7721	0.000373945
SPAC1834.05	Glu	1	2530.75	52.1271	4029	4.62514e-05
SPAC1834.06c	Glu	1	2557.76	92.2759	4072	8.18746e-05
SPAC1834.07	Glu	1	832.905	17.8667	1326	1.58528e-05
SPAC1834.08	Glu	1	5187.13	37.6552	8258	3.34107e-05
SPAC1834.09	Glu	1	431.528	16.7345	687	1.48482e-05
SPAC1834.10c	Glu	1	462.306	30.7482	736	2.72822e-05
SPAC1834.11c	Glu	1	10102.3	151.666	16083	0.00013457
SPAC1834.13	Glu	1	7.5376	1.13592	12	1.00788e-06
SPAC1851.02	Glu	1	4914.52	208.961	7824	0.000185407
SPAC1851.03	Glu	1	1817.82	93.2835	2894	8.27686e-05
SPAC1851.04c	Glu	1	2493.69	28.194	3970	2.5016e-05
SPAC186.01	Glu	1	1560.28	56.8065	2484	5.04033e-05
SPAC186.02c	Glu	1	4.39694	0.157198	7	1.39479e-07
SPAC186.03	Glu	1	3.7688	0.124291	6	1.10281e-07
SPAC186.04c	Glu	1	202.259	13.6816	322	1.21394e-05
SPAC186.05c	Glu	1	873.734	39.5518	1391	3.50935e-05
SPAC186.06	Glu	1	349.242	22.4749	556	1.99415e-05
SPAC186.07c	Glu	1	4.39694	0.157198	7	1.39479e-07
SPAC186.08c	Glu	1	11.9345	0.42926	19	3.80874e-07
SPAC186.09	Glu	1	23.2409	0.482883	37	4.28452e-07
SPAC18B11.02c	Glu	1	3119.31	94.0165	4966	8.3419e-05
SPAC18B11.03c	Glu	1	946.598	25.1553	1507	2.23198e-05
SPAC18B11.04	Glu	1	2234.27	139.266	3557	0.000123568
SPAC18B11.05	Glu	1	2632.51	67.3999	4191	5.98026e-05
SPAC18B11.06	Glu	1	2519.44	91.4478	4011	8.11398e-05
SPAC18B11.07c	Glu	1	4162.64	326.038	6627	0.000289287
SPAC18B11.08c	Glu	1	1445.34	179.242	2301	0.000159038
SPAC18B11.09c	Glu	1	775.117	44.3656	1234	3.93647e-05
SPAC18B11.10	Glu	1	1572.22	30.4355	2503	2.70048e-05
SPAC18B11.11	Glu	1	847.981	7.79576	1350	6.91702e-06
SPAC18G6.01c	Glu	1	760.042	34.8022	1210	3.08793e-05
SPAC18G6.02c	Glu	1	972.979	12.0538	1549	1.06951e-05
SPAC18G6.03	Glu	1	6876.18	380.76	10947	0.000337841
SPAC18G6.04c	Glu	1	4011.89	97.6748	6387	8.66649e-05
SPAC18G6.05c	Glu	1	10238	45.6333	16299	4.04895e-05
SPAC18G6.06	Glu	1	2893.81	137.807	4607	0.000122274
SPAC18G6.07c	Glu	1	2650.1	87.6398	4219	7.77611e-05
SPAC18G6.09c	Glu	1	327.258	12.4477	521	1.10446e-05
SPAC18G6.10	Glu	1	2643.19	45.6721	4208	4.05239e-05
SPAC18G6.11c	Glu	1	3436.52	68.1883	5471	6.05021e-05
SPAC18G6.12c	Glu	1	753.76	28.9477	1200	2.56847e-05
SPAC18G6.13	Glu	1	182.787	18.923	291	1.679e-05
SPAC18G6.14c	Glu	1	74791.9	4542.98	119070	0.00403089
SPAC18G6.15	Glu	1	2356.13	90.7785	3751	8.0546e-05
SPAC1952.01	Glu	1	251.882	7.33188	401	6.50543e-06
SPAC1952.02	Glu	1	1636.92	96.0004	2606	8.51792e-05
SPAC1952.03	Glu	1	1158.91	42.4529	1845	3.76676e-05
SPAC1952.04c	Glu	1	1258.78	108.596	2004	9.63549e-05
SPAC1952.05	Glu	1	495.598	12.9676	789	1.15059e-05
SPAC1952.06c	Glu	1	797.102	16.7961	1269	1.49028e-05
SPAC1952.07	Glu	1	816.574	30.0049	1300	2.66228e-05
SPAC1952.08c	Glu	1	1701.61	106.065	2709	9.41089e-05
SPAC1952.09c	Glu	1	3551.47	80.999	5654	7.18688e-05
SPAC1952.10c	Glu	1	594.215	19.5424	946	1.73395e-05
SPAC1952.11c	Glu	1	4118.04	58.6445	6556	5.20341e-05
SPAC1952.12c	Glu	1	221.731	12.8145	353	1.13701e-05
SPAC1952.13	Glu	1	1872.47	33.9306	2981	3.01059e-05
SPAC1952.14c	Glu	1	826.624	67.4058	1316	5.98079e-05
SPAC1952.15c	Glu	1	11.3064	0.383495	18	3.40268e-07
SPAC1952.16	Glu	1	1206.02	21.398	1920	1.8986e-05
SPAC1952.17c	Glu	1	1228	23.5803	1955	2.09223e-05
SPAC19A8.01c	Glu	1	650.118	7.14671	1035	6.34114e-06
SPAC19A8.02	Glu	1	2981.12	29.235	4746	2.59397e-05
SPAC19A8.03	Glu	1	1645.08	34.9737	2619	3.10315e-05
SPAC19A8.04	Glu	1	27824.4	608.934	44297	0.000540295
SPAC19A8.05c	Glu	1	2689.04	52.396	4281	4.649e-05
SPAC19A8.06	Glu	1	1590.43	47.5746	2532	4.2212e-05
SPAC19A8.07c	Glu	1	1093.58	44.8947	1741	3.98342e-05
SPAC19A8.08	Glu	1	1530.13	17.3493	2436	1.53937e-05
SPAC19A8.09	Glu	1	449.116	65.2059	715	5.78559e-05
SPAC19A8.10	Glu	1	1065.31	49.7371	1696	4.41307e-05
SPAC19A8.11c	Glu	1	752.504	36.2706	1198	3.21822e-05
SPAC19A8.12	Glu	1	1706.01	27.3729	2716	2.42874e-05
SPAC19A8.13	Glu	1	1675.23	76.1231	2667	6.75425e-05
SPAC19A8.14	Glu	1	1535.16	88.7214	2444	7.87207e-05
SPAC19A8.15	Glu	1	26592	453.564	42335	0.000402438
SPAC19A8.16	Glu	1	120.602	21.7546	192	1.93025e-05
SPAC19B12.01	Glu	1	8533.2	124.194	13585	0.000110195
SPAC19B12.02c	Glu	1	15113.5	331.366	24061	0.000294015
SPAC19B12.03	Glu	1	5004.97	32.6141	7968	2.89378e-05
SPAC19B12.04	Glu	1	15626.1	3000.55	24877	0.00266233
SPAC19B12.05c	Glu	1	3704.1	60.9098	5897	5.4044e-05
SPAC19B12.06c	Glu	1	4789.52	220.158	7625	0.000195342
SPAC19B12.07c	Glu	1	946.598	35.2174	1507	3.12477e-05
SPAC19B12.08	Glu	1	883.784	32.7781	1407	2.90833e-05
SPAC19B12.09	Glu	1	1358.03	151.101	2162	0.000134069
SPAC19B12.10	Glu	1	1402.62	38.2998	2233	3.39827e-05
SPAC19B12.11c	Glu	1	2687.78	255.992	4279	0.000227137
SPAC19B12.12c	Glu	1	0	0	0	0
SPAC19B12.13	Glu	1	56.532	0.892618	90	7.92002e-07
SPAC19D5.01	Glu	1	15120.4	252.829	24072	0.00022433
SPAC19D5.02c	Glu	1	1275.11	67.7708	2030	6.01317e-05
SPAC19D5.03	Glu	1	705.394	20.6847	1123	1.83531e-05
SPAC19D5.04	Glu	1	9182.69	33.8671	14619	3.00496e-05
SPAC19D5.05c	Glu	1	1823.47	117.984	2903	0.000104685
SPAC19D5.06c	Glu	1	456.025	15.38	726	1.36464e-05
SPAC19D5.07	Glu	1	360.549	9.03676	574	8.01814e-06
SPAC19D5.09c	Glu	1	0	0	0	0
SPAC19D5.10c	Glu	1	8.79387	1.18971	14	1.0556e-06
SPAC19D5.11c	Glu	1	137.561	14.8883	219	1.32101e-05
SPAC19E9.01c	Glu	1	2104.25	67.3436	3350	5.97526e-05
SPAC19E9.02	Glu	1	2874.34	47.3306	4576	4.19955e-05
SPAC19E9.03	Glu	1	6462.24	186.736	10288	0.000165687
SPAC19G12.01c	Glu	1	396.352	6.55377	631	5.81503e-06
SPAC19G12.02c	Glu	1	1685.28	25.2376	2683	2.23928e-05
SPAC19G12.03	Glu	1	1804	66.9074	2872	5.93656e-05
SPAC19G12.04	Glu	1	585.421	36.3002	932	3.22085e-05
SPAC19G12.05	Glu	1	1697.22	69.1985	2702	6.13985e-05
SPAC19G12.06c	Glu	1	8854.8	798.633	14097	0.000708611
SPAC19G12.07c	Glu	1	1154.51	22.7564	1838	2.01913e-05
SPAC19G12.08	Glu	1	4802.08	164.283	7645	0.000145765
SPAC19G12.09	Glu	1	10306.4	430.532	16408	0.000382002
SPAC19G12.10c	Glu	1	47020.8	558.125	74858	0.000495214
SPAC19G12.11	Glu	1	1811.54	85.9243	2884	7.62389e-05
SPAC19G12.12	Glu	1	784.539	31.6618	1249	2.80928e-05
SPAC19G12.13c	Glu	1	488.06	23.2421	777	2.06223e-05
SPAC19G12.14	Glu	1	3398.83	54.4607	5411	4.83219e-05
SPAC19G12.15c	Glu	1	14005.5	203.839	22297	0.000180862
SPAC19G12.16c	Glu	1	3042.68	53.9854	4844	4.79001e-05
SPAC19G12.17	Glu	1	935.919	106.119	1490	9.41569e-05
SPAC1A6.01c	Glu	1	1956.64	51.0843	3115	4.53261e-05
SPAC1A6.02	Glu	1	1641.94	53.9997	2614	4.79129e-05
SPAC1A6.03c	Glu	1	11009.9	197.703	17528	0.000175418
SPAC1A6.04c	Glu	1	91222	1768.78	145227	0.0015694
SPAC1A6.05c	Glu	1	1363.05	33.5281	2170	2.97488e-05
SPAC1A6.06c	Glu	1	54.6476	3.49785	87	3.10357e-06
SPAC1A6.07	Glu	1	9925.14	185.498	15801	0.000164589
SPAC1A6.08c	Glu	1	991.823	41.2867	1579	3.66329e-05
SPAC1A6.09c	Glu	1	2352.36	71.6258	3745	6.35522e-05
SPAC1A6.10	Glu	1	1390.06	34.0518	2213	3.02135e-05
SPAC1A6.11	Glu	1	36.4318	4.05358	58	3.59666e-06
SPAC1B1.01	Glu	1	4846.68	120.462	7716	0.000106884
SPAC1B1.02c	Glu	1	2363.67	52.3054	3763	4.64095e-05
SPAC1B1.03c	Glu	1	8895.63	122.576	14162	0.000108759
SPAC1B1.04c	Glu	1	1986.79	34.6824	3163	3.0773e-05
SPAC1B2.02c	Glu	1	2967.3	83.7128	4724	7.42767e-05
SPAC1B2.03c	Glu	1	884.412	31.4306	1408	2.78877e-05
SPAC1B2.04	Glu	1	5307.1	448.106	8449	0.000397595
SPAC1B2.05	Glu	1	1600.48	26.4277	2548	2.34487e-05
SPAC1B2.06	Glu	1	22.6128	3.16722	36	2.81021e-06
SPAC1B3.01c	Glu	1	3555.87	192.427	5661	0.000170736
SPAC1B3.02c	Glu	1	954.763	105.248	1520	9.33845e-05
SPAC1B3.03c	Glu	1	9377.41	312.721	14929	0.000277471
SPAC1B3.04c	Glu	1	1050.87	19.1592	1673	1.69996e-05
SPAC1B3.05	Glu	1	3628.73	67.3967	5777	5.97998e-05
SPAC1B3.06c	Glu	1	2945.95	125.708	4690	0.000111538
SPAC1B3.07c	Glu	1	457.909	21.8939	729	1.9426e-05
SPAC1B3.08	Glu	1	4434	124.501	7059	0.000110467
SPAC1B3.09c	Glu	1	2725.47	61.3378	4339	5.44238e-05
SPAC1B3.10c	Glu	1	466.703	8.35529	743	7.41348e-06
SPAC1B3.11c	Glu	1	937.176	47.4783	1492	4.21266e-05
SPAC1B3.12c	Glu	1	1819.08	300.788	2896	0.000266883
SPAC1B3.13	Glu	1	4924.57	72.6502	7840	6.44611e-05
SPAC1B3.14	Glu	1	6140.64	451.274	9776	0.000400407
SPAC1B3.15c	Glu	1	1592.32	30.1385	2535	2.67413e-05
SPAC1B3.16c	Glu	1	10918.8	228.458	17383	0.000202706
SPAC1B3.17	Glu	1	322.861	7.14456	514	6.33922e-06
SPAC1B3.18c	Glu	1	445.347	23.6697	709	2.10016e-05
SPAC1B3.20	Glu	1	719.841	108.481	1146	9.62527e-05
SPAC1B3.21	Glu	1	229.269	38.9932	365	3.45979e-05
SPAC1B9.02c	Glu	1	5312.13	90.7357	8457	8.05079e-05
SPAC1B9.03c	Glu	1	5097.31	155.603	8115	0.000138064
SPAC1D4.01	Glu	1	979.261	45.7194	1559	4.05659e-05
SPAC1D4.02c	Glu	1	2529.49	87.0362	4027	7.72255e-05
SPAC1D4.03c	Glu	1	866.825	20.0775	1380	1.78144e-05
SPAC1D4.04	Glu	1	10884.3	245.419	17328	0.000217756
SPAC1D4.05c	Glu	1	1435.29	44.0402	2285	3.9076e-05
SPAC1D4.06c	Glu	1	799.614	31.0088	1273	2.75135e-05
SPAC1D4.08	Glu	1	2433.39	121.724	3874	0.000108004
SPAC1D4.09c	Glu	1	1852.99	91.5376	2950	8.12195e-05
SPAC1D4.10	Glu	1	1143.2	16.8028	1820	1.49088e-05
SPAC1D4.11c	Glu	1	959.16	16.5255	1527	1.46628e-05
SPAC1D4.12	Glu	1	1418.33	21.8443	2258	1.9382e-05
SPAC1D4.13	Glu	1	2908.26	101.536	4630	9.00911e-05
SPAC1D4.14	Glu	1	4547.06	33.2317	7239	2.94858e-05
SPAC1F12.02c	Glu	1	45342.5	3194.19	72186	0.00283414
SPAC1F12.04c	Glu	1	707.907	43.8952	1127	3.89473e-05
SPAC1F12.05	Glu	1	1010.67	31.8316	1609	2.82436e-05
SPAC1F12.06c	Glu	1	251.253	11.8232	400	1.04905e-05
SPAC1F12.07	Glu	1	14379.9	438.968	22893	0.000389487
SPAC1F12.08	Glu	1	1324.73	49.7521	2109	4.41441e-05
SPAC1F12.09	Glu	1	1442.82	30.9501	2297	2.74614e-05
SPAC1F12.10c	Glu	1	3722.32	299.429	5926	0.000265678
SPAC1F3.01	Glu	1	2565.3	39.2555	4084	3.48306e-05
SPAC1F3.02c	Glu	1	3489.91	37.1966	5556	3.30038e-05
SPAC1F3.03	Glu	1	1104.89	13.0886	1759	1.16133e-05
SPAC1F3.04c	Glu	1	2092.94	86.2187	3332	7.65002e-05
SPAC1F3.05	Glu	1	2464.17	57.4106	3923	5.09393e-05
SPAC1F3.06c	Glu	1	7360.47	44.7544	11718	3.97096e-05
SPAC1F3.07c	Glu	1	1665.81	49.0893	2652	4.35559e-05
SPAC1F3.08c	Glu	1	27.0098	2.9501	43	2.61756e-06
SPAC1F3.09	Glu	1	6941.51	147.048	11051	0.000130473
SPAC1F3.10c	Glu	1	1071.6	16.7205	1706	1.48358e-05
SPAC1F5.02	Glu	1	20587.1	497.153	32775	0.000441114
SPAC1F5.03c	Glu	1	2989.92	92.94	4760	8.24638e-05
SPAC1F5.04c	Glu	1	2356.76	15.2324	3752	1.35154e-05
SPAC1F5.05c	Glu	1	535.17	41.917	852	3.71921e-05
SPAC1F5.06	Glu	1	7596.02	106.517	12093	9.45108e-05
SPAC1F5.07c	Glu	1	2198.47	53.3066	3500	4.72979e-05
SPAC1F5.08c	Glu	1	1382.52	33.7976	2201	2.99879e-05
SPAC1F5.09c	Glu	1	232.409	4.68969	370	4.16107e-06
SPAC1F5.10	Glu	1	2266.31	68.3068	3608	6.06073e-05
SPAC1F5.11c	Glu	1	2445.95	7.96497	3894	7.06716e-06
SPAC1F7.01c	Glu	1	6405.71	55.8289	10198	4.95358e-05
SPAC1F7.02c	Glu	1	4880.6	100.355	7770	8.90426e-05
SPAC1F7.03	Glu	1	2818.44	47.1934	4487	4.18737e-05
SPAC1F7.04	Glu	1	9138.09	535.922	14548	0.000475513
SPAC1F7.05	Glu	1	7856.7	115.193	12508	0.000102209
SPAC1F7.06	Glu	1	6.28134	0.296752	10	2.63302e-07
SPAC1F7.07c	Glu	1	1340.44	40.0964	2134	3.55768e-05
SPAC1F7.08	Glu	1	1666.44	31.8452	2653	2.82556e-05
SPAC1F7.09c	Glu	1	2296.46	79.7089	3656	7.07241e-05
SPAC1F7.10	Glu	1	755.017	37.6098	1202	3.33704e-05
SPAC1F7.11c	Glu	1	1298.35	19.7412	2067	1.7516e-05
SPAC1F7.12	Glu	1	11703.4	408.601	18632	0.000362544
SPAC1F7.13c	Glu	1	83676.2	3922.03	133214	0.00347994
SPAC1F7.14c	Glu	1	190.325	27.6327	303	2.45179e-05
SPAC1F8.01	Glu	1	768.836	16.4627	1224	1.4607e-05
SPAC1F8.02c	Glu	1	7.5376	0.395321	12	3.5076e-07
SPAC1F8.03c	Glu	1	43.9694	0.829589	70	7.36078e-07
SPAC1F8.04c	Glu	1	130.024	3.33616	207	2.96011e-06
SPAC1F8.05	Glu	1	442.206	28.7684	704	2.55256e-05
SPAC1F8.06	Glu	1	1546.47	47.6975	2462	4.2321e-05
SPAC1F8.07c	Glu	1	102269	2139.8	162814	0.00189861
SPAC1F8.08	Glu	1	71.6072	7.04554	114	6.25136e-06
SPAC20G4.01	Glu	1	1315.31	55.7269	2094	4.94454e-05
SPAC20G4.02c	Glu	1	2210.4	19.1665	3519	1.70061e-05
SPAC20G4.03c	Glu	1	3388.15	57.2158	5394	5.07665e-05
SPAC20G4.04c	Glu	1	618.084	25.5504	984	2.26703e-05
SPAC20G4.05c	Glu	1	1766.94	36.9702	2813	3.28029e-05
SPAC20G4.06c	Glu	1	20148	1738.18	32076	0.00154226
SPAC20G4.07c	Glu	1	4745.55	124.444	7555	0.000110416
SPAC20G4.08	Glu	1	2988.66	33.0372	4758	2.93132e-05
SPAC20G4.09	Glu	1	6.28134	2.99126	10	2.65409e-06
SPAC20G8.01	Glu	1	1499.98	23.2222	2388	2.06046e-05
SPAC20G8.02	Glu	1	1706.64	26.8049	2717	2.37835e-05
SPAC20G8.03	Glu	1	12371.7	263.96	19696	0.000234207
SPAC20G8.04c	Glu	1	8379.93	157.608	13341	0.000139843
SPAC20G8.05c	Glu	1	2780.12	35.6663	4426	3.1646e-05
SPAC20G8.06	Glu	1	6864.87	38.8999	10929	3.45151e-05
SPAC20G8.07c	Glu	1	3388.78	183.385	5395	0.000162714
SPAC20G8.08c	Glu	1	587.305	7.39902	935	6.565e-06
SPAC20G8.09c	Glu	1	5804.58	66.8333	9241	5.92999e-05
SPAC20G8.10c	Glu	1	897.603	22.9813	1429	2.03908e-05
SPAC20H4.01	Glu	1	2543.31	45.3959	4049	4.02789e-05
SPAC20H4.02	Glu	1	2295.2	108.865	3654	9.6594e-05
SPAC20H4.03c	Glu	1	2319.7	93.9348	3693	8.33465e-05
SPAC20H4.04	Glu	1	1111.8	16.8831	1770	1.498e-05
SPAC20H4.05c	Glu	1	650.747	33.8313	1036	3.00178e-05
SPAC20H4.06c	Glu	1	546.476	12.1607	870	1.079e-05
SPAC20H4.07	Glu	1	1188.43	39.8554	1892	3.53629e-05
SPAC20H4.08	Glu	1	1469.2	64.5439	2339	5.72685e-05
SPAC20H4.09	Glu	1	1078.51	19.8148	1717	1.75813e-05
SPAC20H4.10	Glu	1	4569.67	53.8117	7275	4.7746e-05
SPAC20H4.11c	Glu	1	263.188	15.5888	419	1.38316e-05
SPAC212.01c	Glu	1	0	0	0	0
SPAC212.02	Glu	1	0.628134	0.0545851	1	4.84322e-08
SPAC212.03	Glu	1	0	0	0	0
SPAC212.04c	Glu	1	238.063	9.80699	379	8.70155e-06
SPAC212.05c	Glu	1	0	NA	0	NA
SPAC212.06c	Glu	1	8.16574	0.656865	13	5.82823e-07
SPAC212.07c	Glu	1	11.9345	NA	19	NA
SPAC212.08c	Glu	1	10.0501	0.428855	16	3.80514e-07
SPAC212.09c	Glu	1	0	NA	0	NA
SPAC212.10	Glu	1	0	NA	0	NA
SPAC212.11	Glu	1	0	0	0	0
SPAC212.12	Glu	1	0	0	0	0
SPAC21E11.03c	Glu	1	3102.35	214.736	4939	0.000190531
SPAC21E11.04	Glu	1	1972.34	111.816	3140	9.92123e-05
SPAC21E11.05c	Glu	1	1630.01	37.5354	2595	3.33044e-05
SPAC21E11.06	Glu	1	2785.77	70.8667	4435	6.28786e-05
SPAC21E11.07	Glu	1	1451.62	53.0123	2311	4.70368e-05
SPAC21E11.08	Glu	1	10554.5	208.039	16803	0.000184589
SPAC222.03c	Glu	1	1594.83	210.967	2539	0.000187187
SPAC222.04c	Glu	1	939.06	94.7444	1495	8.40648e-05
SPAC222.05c	Glu	1	1234.28	29.5666	1965	2.62338e-05
SPAC222.06	Glu	1	3952.22	155.289	6292	0.000137785
SPAC222.07c	Glu	1	869.965	16.1832	1385	1.4359e-05
SPAC222.08c	Glu	1	2099.85	106.381	3343	9.43895e-05
SPAC222.09	Glu	1	7798.28	149.503	12415	0.000132651
SPAC222.10c	Glu	1	940.316	16.809	1497	1.49143e-05
SPAC222.11	Glu	1	5254.97	199.879	8366	0.000177349
SPAC222.12c	Glu	1	78885.4	1785.47	125587	0.00158422
SPAC222.13c	Glu	1	1773.85	35.6127	2824	3.15984e-05
SPAC222.14c	Glu	1	4659.5	72.7037	7418	6.45086e-05
SPAC222.15	Glu	1	50.2507	2.75692	80	2.44616e-06
SPAC222.16c	Glu	1	599.868	21.0668	955	1.86921e-05
SPAC222.17	Glu	1	873.734	115.579	1391	0.000102551
SPAC222.18	Glu	1	646.978	68.7723	1030	6.10203e-05
SPAC222.19	Glu	1	780.77	78.7741	1243	6.98947e-05
SPAC227.01c	Glu	1	693.46	22.0746	1104	1.95863e-05
SPAC227.02c	Glu	1	704.766	40.7305	1122	3.61394e-05
SPAC227.03c	Glu	1	881.9	28.224	1404	2.50426e-05
SPAC227.04	Glu	1	725.494	47.9848	1155	4.2576e-05
SPAC227.05	Glu	1	850.493	81.6566	1354	7.24523e-05
SPAC227.06	Glu	1	3257.5	155.127	5186	0.000137641
SPAC227.07c	Glu	1	3290.79	84.4355	5239	7.49179e-05
SPAC227.08c	Glu	1	863.684	60.1314	1375	5.33534e-05
SPAC227.09	Glu	1	955.391	27.2112	1521	2.41439e-05
SPAC227.10	Glu	1	976.12	101.053	1554	8.9662e-05
SPAC227.11c	Glu	1	1139.43	43.6186	1814	3.87019e-05
SPAC227.12	Glu	1	860.543	22.1276	1370	1.96334e-05
SPAC227.13c	Glu	1	2474.22	152.624	3939	0.00013542
SPAC227.14	Glu	1	1740.56	87.805	2771	7.79076e-05
SPAC227.15	Glu	1	1552.12	21.1425	2471	1.87593e-05
SPAC227.16c	Glu	1	1521.34	108.456	2422	9.62305e-05
SPAC227.17c	Glu	1	418.965	40.8847	667	3.62762e-05
SPAC227.18	Glu	1	22418.7	723.314	35691	0.000641782
SPAC227.19c	Glu	1	336.052	47.6287	535	4.226e-05
SPAC22A12.01c	Glu	1	971.095	20.6083	1546	1.82853e-05
SPAC22A12.02c	Glu	1	34.5474	3.29039	55	2.9195e-06
SPAC22A12.03c	Glu	1	1219.84	38.4195	1942	3.40889e-05
SPAC22A12.04c	Glu	1	45804.8	4162.76	72922	0.00369354
SPAC22A12.05	Glu	1	967.954	104.762	1541	9.29534e-05
SPAC22A12.06c	Glu	1	4384.37	121.39	6980	0.000107707
SPAC22A12.07c	Glu	1	6734.22	89.6793	10721	7.95707e-05
SPAC22A12.08c	Glu	1	3328.48	69.3989	5299	6.15762e-05
SPAC22A12.09c	Glu	1	1793.95	44.3104	2856	3.93157e-05
SPAC22A12.10	Glu	1	3937.14	121.119	6268	0.000107467
SPAC22A12.11	Glu	1	17530	359.209	27908	0.000318719
SPAC22A12.12c	Glu	1	1428.38	70.5615	2274	6.26078e-05
SPAC22A12.13	Glu	1	589.189	35.7883	938	3.17543e-05
SPAC22A12.14c	Glu	1	5604.84	191.746	8923	0.000170132
SPAC22A12.15c	Glu	1	56527.6	1013.53	89993	0.000899282
SPAC22A12.16	Glu	1	26246.6	633.823	41785	0.000562378
SPAC22A12.17c	Glu	1	463.563	21.0644	738	1.869e-05
SPAC22E12.01	Glu	1	691.575	21.9559	1101	1.9481e-05
SPAC22E12.02	Glu	1	582.908	31.5442	928	2.79886e-05
SPAC22E12.03c	Glu	1	1456.01	90.2831	2318	8.01064e-05
SPAC22E12.04	Glu	1	3636.89	145.297	5790	0.000128919
SPAC22E12.05c	Glu	1	2651.35	170.623	4221	0.000151391
SPAC22E12.06c	Glu	1	582.28	20.8176	927	1.8471e-05
SPAC22E12.07	Glu	1	4221.06	129.853	6720	0.000115216
SPAC22E12.08	Glu	1	432.156	52.4997	688	4.65819e-05
SPAC22E12.09c	Glu	1	5184.62	86.9362	8254	7.71367e-05
SPAC22E12.10c	Glu	1	6285.11	121.275	10006	0.000107605
SPAC22E12.11c	Glu	1	2001.23	27.704	3186	2.45812e-05
SPAC22E12.13c	Glu	1	3509.38	216.479	5587	0.000192078
SPAC22E12.14c	Glu	1	706.65	13.003	1125	1.15373e-05
SPAC22E12.16c	Glu	1	4269.43	59.6585	6797	5.29338e-05
SPAC22E12.17c	Glu	1	5256.22	129.292	8368	0.000114718
SPAC22E12.18	Glu	1	1730.51	61.1345	2755	5.42434e-05
SPAC22E12.19	Glu	1	1957.26	35.1993	3116	3.12316e-05
SPAC22F3.02	Glu	1	192.209	10.8967	306	9.66846e-06
SPAC22F3.03c	Glu	1	544.592	7.98468	867	7.08465e-06
SPAC22F3.04	Glu	1	28.8942	0.23118	46	2.05121e-07
SPAC22F3.05c	Glu	1	64.6978	4.11898	103	3.65469e-06
SPAC22F3.06c	Glu	1	10467.8	116.689	16665	0.000103535
SPAC22F3.07c	Glu	1	3481.75	348.331	5543	0.000309067
SPAC22F3.08c	Glu	1	883.156	21.8139	1406	1.9355e-05
SPAC22F3.09c	Glu	1	2097.97	37.959	3340	3.36803e-05
SPAC22F3.10c	Glu	1	11680.8	207.558	18596	0.000184162
SPAC22F3.11c	Glu	1	413.94	28.3224	659	2.51299e-05
SPAC22F3.12c	Glu	1	1502.5	37.1115	2392	3.29283e-05
SPAC22F3.13	Glu	1	2002.49	26.4893	3188	2.35034e-05
SPAC22F3.15	Glu	1	654.515	62.8406	1042	5.57572e-05
SPAC22F8.02c	Glu	1	796.474	25.4217	1268	2.25562e-05
SPAC22F8.03c	Glu	1	1.25627	0.111614	2	9.90331e-08
SPAC22F8.04	Glu	1	3341.67	103.604	5320	9.19254e-05
SPAC22F8.05	Glu	1	27750.9	370.387	44180	0.000328637
SPAC22F8.06	Glu	1	5070.92	267.129	8073	0.000237018
SPAC22F8.07c	Glu	1	1757.52	44.8049	2798	3.97545e-05
SPAC22F8.08	Glu	1	11154.4	143.255	17758	0.000127107
SPAC22F8.09	Glu	1	3690.91	104.623	5876	9.28299e-05
SPAC22F8.10c	Glu	1	1922.72	38.0243	3061	3.37382e-05
SPAC22F8.11	Glu	1	985.542	13.0369	1569	1.15674e-05
SPAC22F8.12c	Glu	1	255.022	18.2899	406	1.62283e-05
SPAC22G7.01c	Glu	1	4130.61	82.0974	6576	7.28434e-05
SPAC22G7.02	Glu	1	2321.58	27.8903	3696	2.47465e-05
SPAC22G7.03	Glu	1	224.872	11.2961	358	1.00228e-05
SPAC22G7.04	Glu	1	3194.06	34.9187	5085	3.09826e-05
SPAC22G7.05	Glu	1	4352.97	86.5169	6930	7.67647e-05
SPAC22G7.06c	Glu	1	27622.8	146.485	43976	0.000129973
SPAC22G7.07c	Glu	1	860.543	24.393	1370	2.16434e-05
SPAC22G7.08	Glu	1	2096.08	48.5498	3337	4.30773e-05
SPAC22G7.09c	Glu	1	1616.19	45.1674	2573	4.00761e-05
SPAC22G7.10	Glu	1	1863.67	64.3121	2967	5.70629e-05
SPAC22G7.11c	Glu	1	1097.98	92.7079	1748	8.22579e-05
SPAC22H10.02	Glu	1	1567.19	134.23	2495	0.0001191
SPAC22H10.03c	Glu	1	4341.66	52.001	6912	4.61395e-05
SPAC22H10.04	Glu	1	1128.76	43.6307	1797	3.87126e-05
SPAC22H10.05c	Glu	1	3212.28	83.6833	5114	7.42506e-05
SPAC22H10.06c	Glu	1	15.0752	1.90932	24	1.6941e-06
SPAC22H10.07	Glu	1	1878.75	41.6521	2991	3.69571e-05
SPAC22H10.08	Glu	1	1343.58	32.4458	2139	2.87885e-05
SPAC22H10.09	Glu	1	1352.37	24.8848	2153	2.20798e-05
SPAC22H10.10	Glu	1	741.826	17.2494	1181	1.53051e-05
SPAC22H10.11c	Glu	1	2275.73	43.0053	3623	3.81578e-05
SPAC22H10.12c	Glu	1	8484.2	229.042	13507	0.000203224
SPAC22H10.13	Glu	1	258.163	60.2651	411	5.34721e-05
SPAC22H12.01c	Glu	1	3885.64	196.851	6186	0.000174662
SPAC22H12.02	Glu	1	4172.06	205.248	6642	0.000182112
SPAC22H12.03	Glu	1	1462.3	64.2404	2328	5.69992e-05
SPAC22H12.04c	Glu	1	118875	5593.87	189251	0.00496333
SPAC22H12.05c	Glu	1	1935.28	31.6052	3081	2.80427e-05
SPAC23A1.02c	Glu	1	238.691	6.59327	380	5.85008e-06
SPAC23A1.03	Glu	1	4243.04	267.275	6755	0.000237148
SPAC23A1.04c	Glu	1	481.15	7.26937	766	6.44997e-06
SPAC23A1.05	Glu	1	756.273	88.2716	1204	7.83216e-05
SPAC23A1.06c	Glu	1	1743.7	41.1076	2776	3.6474e-05
SPAC23A1.07	Glu	1	320.348	15.1344	510	1.34284e-05
SPAC23A1.08c	Glu	1	72948.3	7685.62	116135	0.0068193
SPAC23A1.09	Glu	1	520.723	50.8147	829	4.50868e-05
SPAC23A1.10	Glu	1	51300.3	1324.83	81671	0.0011755
SPAC23A1.11	Glu	1	69209.7	4161.44	110183	0.00369236
SPAC23A1.12c	Glu	1	6352.94	128.193	10114	0.000113743
SPAC23A1.14c	Glu	1	5187.13	154.773	8258	0.000137327
SPAC23A1.15c	Glu	1	1228	64.4044	1955	5.71447e-05
SPAC23A1.16c	Glu	1	162.687	9.78203	259	8.6794e-06
SPAC23A1.17	Glu	1	10339.7	76.3635	16461	6.77558e-05
SPAC23A1.18c	Glu	1	3361.77	131.655	5352	0.000116815
SPAC23A1.19c	Glu	1	2026.99	22.6805	3227	2.01239e-05
SPAC23A1.20	Glu	1	748.735	51.5258	1192	4.57178e-05
SPAC23C11.01	Glu	1	1556.52	41.925	2478	3.71993e-05
SPAC23C11.02c	Glu	1	49837.4	4120.36	79342	0.00365591
SPAC23C11.03	Glu	1	2554.62	50.7741	4067	4.50508e-05
SPAC23C11.04c	Glu	1	251.882	7.33188	401	6.50543e-06
SPAC23C11.05	Glu	1	34320.6	1408.96	54639	0.00125014
SPAC23C11.06c	Glu	1	7970.39	177.034	12689	0.000157079
SPAC23C11.07	Glu	1	16.3315	1.75164	26	1.5542e-06
SPAC23C11.08	Glu	1	2448.47	249.144	3898	0.000221061
SPAC23C11.09	Glu	1	11828.4	146.689	18831	0.000130154
SPAC23C11.10	Glu	1	344.845	15.4342	549	1.36945e-05
SPAC23C11.11	Glu	1	4656.98	166.496	7414	0.000147728
SPAC23C11.12	Glu	1	408.915	60.1022	651	5.33275e-05
SPAC23C11.13c	Glu	1	2476.73	142.446	3943	0.00012639
SPAC23C11.14	Glu	1	6203.45	190.346	9876	0.00016889
SPAC23C11.15	Glu	1	2957.25	32.7204	4708	2.90322e-05
SPAC23C11.16	Glu	1	1334.78	23.2326	2125	2.06138e-05
SPAC23C11.17	Glu	1	6291.39	154.118	10016	0.000136746
SPAC23C4.02	Glu	1	894.462	17.6892	1424	1.56953e-05
SPAC23C4.03	Glu	1	3398.2	82.7338	5410	7.3408e-05
SPAC23C4.04c	Glu	1	413.94	34.9511	659	3.10114e-05
SPAC23C4.05c	Glu	1	7974.79	219.775	12696	0.000195002
SPAC23C4.06c	Glu	1	1202.88	43.6606	1915	3.87392e-05
SPAC23C4.07	Glu	1	124.37	7.33007	198	6.50383e-06
SPAC23C4.08	Glu	1	2491.18	143.973	3966	0.000127744
SPAC23C4.09c	Glu	1	1739.3	156.871	2769	0.000139189
SPAC23C4.10	Glu	1	899.488	20.2817	1432	1.79955e-05
SPAC23C4.11	Glu	1	1143.2	223.119	1820	0.000197969
SPAC23C4.12	Glu	1	1725.48	51.2282	2747	4.54537e-05
SPAC23C4.13	Glu	1	1295.84	130.741	2063	0.000116004
SPAC23C4.14	Glu	1	1495.59	41.8953	2381	3.71728e-05
SPAC23C4.15	Glu	1	2077.24	117.205	3307	0.000103994
SPAC23C4.16c	Glu	1	2167.06	60.705	3450	5.38624e-05
SPAC23C4.17	Glu	1	1213.55	21.0609	1932	1.86869e-05
SPAC23C4.18c	Glu	1	1182.78	21.697	1883	1.92513e-05
SPAC23C4.19	Glu	1	6891.26	82.7879	10971	7.34561e-05
SPAC23D3.01	Glu	1	468.588	13.6733	746	1.2132e-05
SPAC23D3.02	Glu	1	771.348	26.9301	1228	2.38946e-05
SPAC23D3.03c	Glu	1	4026.97	101.358	6411	8.99332e-05
SPAC23D3.04c	Glu	1	7266.88	231.323	11569	0.000205248
SPAC23D3.05c	Glu	1	593.586	NA	945	NA
SPAC23D3.06c	Glu	1	3876.21	34.8022	6171	3.08793e-05
SPAC23D3.07	Glu	1	5205.97	231.265	8288	0.000205197
SPAC23D3.08	Glu	1	2528.87	89.0741	4026	7.90337e-05
SPAC23D3.09	Glu	1	998.733	27.9771	1590	2.48235e-05
SPAC23D3.10c	Glu	1	2329.12	39.2207	3708	3.47997e-05
SPAC23D3.11	Glu	1	990.567	39.7072	1577	3.52314e-05
SPAC23D3.12	Glu	1	5497.43	116.873	8752	0.000103699
SPAC23D3.13c	Glu	1	2138.8	15.7471	3405	1.39721e-05
SPAC23D3.14c	Glu	1	611.174	12.5021	973	1.10929e-05
SPAC23D3.16	Glu	1	416.453	60.4636	663	5.36482e-05
SPAC23D3.17	Glu	1	298.992	45.0583	476	3.99793e-05
SPAC23E2.01	Glu	1	2803.36	59.0708	4463	5.24123e-05
SPAC23E2.02	Glu	1	2682.76	25.07	4271	2.22441e-05
SPAC23E2.03c	Glu	1	947.226	19.7843	1508	1.75542e-05
SPAC23G3.01	Glu	1	10781.3	105.991	17164	9.40437e-05
SPAC23G3.02c	Glu	1	6977.94	16.868	11109	1.49666e-05
SPAC23G3.03	Glu	1	4648.82	128.115	7401	0.000113674
SPAC23G3.04	Glu	1	582.28	35.55	927	3.15428e-05
SPAC23G3.05c	Glu	1	1127.5	39.0212	1795	3.46227e-05
SPAC23G3.06	Glu	1	16791.3	392.743	26732	0.000348473
SPAC23G3.07c	Glu	1	855.518	37.0373	1362	3.28624e-05
SPAC23G3.08c	Glu	1	2048.97	27.8467	3262	2.47079e-05
SPAC23G3.09	Glu	1	2285.78	74.3525	3639	6.59715e-05
SPAC23G3.10c	Glu	1	945.341	26.4193	1505	2.34413e-05
SPAC23G3.11	Glu	1	5673.3	160.054	9032	0.000142013
SPAC23G3.12c	Glu	1	2371.83	28.3225	3776	2.513e-05
SPAC23H3.02c	Glu	1	1480.51	149.373	2357	0.000132536
SPAC23H3.03c	Glu	1	930.894	27.0308	1482	2.39839e-05
SPAC23H3.04	Glu	1	298.364	10.0342	475	8.90319e-06
SPAC23H3.05c	Glu	1	1452.87	43.3508	2313	3.84643e-05
SPAC23H3.06	Glu	1	2567.81	40.9795	4088	3.63603e-05
SPAC23H3.07c	Glu	1	892.578	100.25	1421	8.89495e-05
SPAC23H3.08c	Glu	1	1189.06	44.1002	1893	3.91292e-05
SPAC23H3.09c	Glu	1	18785	593.214	29906	0.000526347
SPAC23H3.10	Glu	1	2194.7	51.8426	3494	4.59989e-05
SPAC23H3.11c	Glu	1	844.84	15.9653	1345	1.41657e-05
SPAC23H3.12c	Glu	1	155.149	8.13702	247	7.21982e-06
SPAC23H3.13c	Glu	1	1797.72	60.2887	2862	5.34929e-05
SPAC23H3.14	Glu	1	1673.98	42.4027	2665	3.76231e-05
SPAC23H3.15c	Glu	1	52891.4	1931.57	84204	0.00171384
SPAC23H4.01c	Glu	1	9075.28	114.212	14448	0.000101338
SPAC23H4.02	Glu	1	1398.85	31.2455	2227	2.77235e-05
SPAC23H4.03c	Glu	1	4035.13	221.381	6424	0.000196427
SPAC23H4.04	Glu	1	1544.58	44.2038	2459	3.92212e-05
SPAC23H4.05c	Glu	1	6.90947	0.839385	11	7.44769e-07
SPAC23H4.06	Glu	1	5163.89	170.772	8221	0.000151523
SPAC23H4.07c	Glu	1	2360.53	123.258	3758	0.000109365
SPAC23H4.08	Glu	1	1386.92	59.3948	2208	5.26999e-05
SPAC23H4.09	Glu	1	8057.07	251.106	12827	0.000222801
SPAC23H4.10c	Glu	1	13329.6	305.769	21221	0.000271302
SPAC23H4.11c	Glu	1	322.861	20.3374	514	1.8045e-05
SPAC23H4.12	Glu	1	2683.39	94.5168	4272	8.38629e-05
SPAC23H4.13c	Glu	1	367.458	23.6471	585	2.09816e-05
SPAC23H4.14	Glu	1	1746.84	22.9545	2781	2.0367e-05
SPAC23H4.15	Glu	1	3845.43	58.3945	6122	5.18123e-05
SPAC23H4.16c	Glu	1	1490.56	53.9382	2373	4.78583e-05
SPAC23H4.17c	Glu	1	393.212	12.6522	626	1.12261e-05
SPAC23H4.18c	Glu	1	800.871	88.2838	1275	7.83324e-05
SPAC23H4.21	Glu	1	211.681	20.4889	337	1.81794e-05
SPAC24B11.05	Glu	1	680.269	35.6777	1083	3.16561e-05
SPAC24B11.06c	Glu	1	9092.86	309.297	14476	0.000274433
SPAC24B11.07c	Glu	1	731.776	15.5019	1165	1.37545e-05
SPAC24B11.08c	Glu	1	2737.41	83.3499	4358	7.39547e-05
SPAC24B11.09	Glu	1	251.882	25.1995	401	2.2359e-05
SPAC24B11.10c	Glu	1	1455.39	18.5712	2317	1.64778e-05
SPAC24B11.11c	Glu	1	2409.52	47.1813	3836	4.1863e-05
SPAC24B11.12c	Glu	1	6743.02	57.2188	10735	5.07691e-05
SPAC24B11.13	Glu	1	1616.82	57.118	2574	5.06797e-05
SPAC24B11.14	Glu	1	187.812	13.389	299	1.18798e-05
SPAC24C9.02c	Glu	1	2395.07	131.402	3813	0.00011659
SPAC24C9.03	Glu	1	4411.38	133.297	7023	0.000118272
SPAC24C9.04	Glu	1	935.291	91.2703	1489	8.09823e-05
SPAC24C9.05c	Glu	1	2452.23	39.9381	3904	3.54362e-05
SPAC24C9.06c	Glu	1	44287.2	667.411	70506	0.000592181
SPAC24C9.07c	Glu	1	1721.09	10.8127	2740	9.59393e-06
SPAC24C9.08	Glu	1	9640.6	192.252	15348	0.000170582
SPAC24C9.09	Glu	1	1310.29	32.8409	2086	2.91391e-05
SPAC24C9.10c	Glu	1	2618.06	118.064	4168	0.000104756
SPAC24C9.11	Glu	1	2345.45	35.9838	3734	3.19277e-05
SPAC24C9.12c	Glu	1	116504	2963.71	185476	0.00262964
SPAC24C9.13c	Glu	1	878.759	117.55	1399	0.0001043
SPAC24C9.14	Glu	1	1032.02	37.2322	1643	3.30353e-05
SPAC24C9.15c	Glu	1	220.475	5.6448	351	5.00852e-06
SPAC24C9.16c	Glu	1	2635.02	468.222	4195	0.000415444
SPAC24H6.01c	Glu	1	1196.59	24.3936	1905	2.1644e-05
SPAC24H6.02c	Glu	1	474.241	32.0796	755	2.84636e-05
SPAC24H6.03	Glu	1	1467.32	22.2252	2336	1.97199e-05
SPAC24H6.04	Glu	1	17009.9	417.543	27080	0.000370478
SPAC24H6.05	Glu	1	1038.93	20.7184	1654	1.8383e-05
SPAC24H6.06	Glu	1	1822.22	30.9916	2901	2.74982e-05
SPAC24H6.07	Glu	1	57324.7	3554.54	91262	0.00315387
SPAC24H6.08	Glu	1	1402.62	75.5598	2233	6.70427e-05
SPAC24H6.09	Glu	1	4077.84	64.3875	6492	5.71298e-05
SPAC24H6.10c	Glu	1	11768.1	379.684	18735	0.000336886
SPAC24H6.11c	Glu	1	2140.05	26.5673	3407	2.35727e-05
SPAC24H6.12c	Glu	1	1691.56	45.2554	2693	4.01543e-05
SPAC24H6.13	Glu	1	5391.27	73.6067	8583	6.53097e-05
SPAC25A8.01c	Glu	1	9389.97	121.117	14949	0.000107465
SPAC25A8.02	Glu	1	1037.68	31.5957	1652	2.80342e-05
SPAC25A8.03c	Glu	1	1260.04	32.0538	2006	2.84407e-05
SPAC25B8.01	Glu	1	1685.28	120.143	2683	0.000106601
SPAC25B8.02	Glu	1	816.574	36.2746	1300	3.21858e-05
SPAC25B8.03	Glu	1	8767.49	201.896	13958	0.000179138
SPAC25B8.04c	Glu	1	962.929	30.2481	1533	2.68385e-05
SPAC25B8.05	Glu	1	417.081	11.01	664	9.76892e-06
SPAC25B8.06c	Glu	1	800.242	19.8483	1274	1.7611e-05
SPAC25B8.07c	Glu	1	181.531	18.9578	289	1.68209e-05
SPAC25B8.08	Glu	1	1001.25	20.1695	1594	1.7896e-05
SPAC25B8.09	Glu	1	694.088	32.7911	1105	2.90949e-05
SPAC25B8.10	Glu	1	3197.83	148.137	5091	0.000131439
SPAC25B8.11	Glu	1	4357.36	79.1999	6937	7.02725e-05
SPAC25B8.12c	Glu	1	11619.2	455.036	18498	0.000403744
SPAC25B8.13c	Glu	1	1133.78	33.9148	1805	3.00919e-05
SPAC25B8.14	Glu	1	396.981	15.5467	632	1.37943e-05
SPAC25B8.15c	Glu	1	548.989	27.4618	874	2.43663e-05
SPAC25B8.16	Glu	1	471.1	8.02377	750	7.11933e-06
SPAC25B8.17	Glu	1	1579.13	63.5138	2514	5.63545e-05
SPAC25B8.18	Glu	1	773.861	75.5171	1232	6.70048e-05
SPAC25B8.19c	Glu	1	2213.54	50.3882	3524	4.47084e-05
SPAC25B8.20	Glu	1	87.3106	14.2392	139	1.26342e-05
SPAC25G10.01	Glu	1	1146.97	45.8225	1826	4.06574e-05
SPAC25G10.02	Glu	1	197.862	9.09505	315	8.06986e-06
SPAC25G10.03	Glu	1	7195.27	258.798	11455	0.000229627
SPAC25G10.04c	Glu	1	981.145	14.7486	1562	1.30861e-05
SPAC25G10.05c	Glu	1	11239.2	430.246	17893	0.000381749
SPAC25G10.06	Glu	1	13041.9	2250.27	20763	0.00199662
SPAC25G10.07c	Glu	1	2202.87	24.1491	3507	2.1427e-05
SPAC25G10.08	Glu	1	25249.1	414.049	40197	0.000367377
SPAC25G10.09c	Glu	1	9714.09	64.4288	15465	5.71664e-05
SPAC25H1.02	Glu	1	832.905	21.3248	1326	1.89211e-05
SPAC25H1.03	Glu	1	627.506	40.382	999	3.58302e-05
SPAC25H1.04	Glu	1	1539.56	74.8121	2451	6.63793e-05
SPAC25H1.05	Glu	1	1435.91	78.4177	2286	6.95785e-05
SPAC25H1.06	Glu	1	1311.54	38.177	2088	3.38737e-05
SPAC25H1.07	Glu	1	4876.2	65.5225	7763	5.81368e-05
SPAC25H1.08c	Glu	1	4736.76	140.982	7541	0.00012509
SPAC25H1.09	Glu	1	64.0696	1.48399	102	1.31672e-06
SPAC25H1.10c	Glu	1	1638.8	282.761	2609	0.000250888
SPAC26A3.01	Glu	1	13243.6	295.261	21084	0.000261979
SPAC26A3.02	Glu	1	925.869	23.8589	1474	2.11695e-05
SPAC26A3.03c	Glu	1	167.084	8.42877	266	7.47868e-06
SPAC26A3.04	Glu	1	41498.9	2791.3	66067	0.00247666
SPAC26A3.05	Glu	1	23320.7	166.552	37127	0.000147778
SPAC26A3.06	Glu	1	1778.87	78.7291	2832	6.98548e-05
SPAC26A3.07c	Glu	1	33350.1	2268.83	53094	0.00201309
SPAC26A3.08	Glu	1	2278.24	183.265	3627	0.000162608
SPAC26A3.09c	Glu	1	1068.46	9.96892	1701	8.84522e-06
SPAC26A3.10	Glu	1	2768.19	35.6669	4407	3.16465e-05
SPAC26A3.11	Glu	1	3699.08	136.343	5889	0.000120975
SPAC26A3.12c	Glu	1	5629.33	67.5597	8962	5.99444e-05
SPAC26A3.13c	Glu	1	10.6783	0.0952988	17	8.45568e-08
SPAC26A3.14c	Glu	1	1547.09	248.901	2463	0.000220845
SPAC26A3.15c	Glu	1	3914.53	77.8028	6232	6.90329e-05
SPAC26A3.16	Glu	1	4913.89	164.793	7823	0.000146218
SPAC26A3.17c	Glu	1	3530.11	117.395	5620	0.000104162
SPAC26F1.01	Glu	1	1316.57	16.8721	2096	1.49703e-05
SPAC26F1.02	Glu	1	452.256	27.1933	720	2.41281e-05
SPAC26F1.03	Glu	1	24774.9	719.399	39442	0.000638308
SPAC26F1.04c	Glu	1	5698.43	181.882	9072	0.00016138
SPAC26F1.05	Glu	1	54.0195	5.54415	86	4.91921e-06
SPAC26F1.06	Glu	1	169851	9538.35	270405	0.00846319
SPAC26F1.07	Glu	1	29587	1093.92	47103	0.000970617
SPAC26F1.08c	Glu	1	597.355	7.2717	951	6.45204e-06
SPAC26F1.09	Glu	1	1474.86	17.0143	2348	1.50964e-05
SPAC26F1.10c	Glu	1	4631.86	100.08	7374	8.87987e-05
SPAC26F1.11	Glu	1	73.4916	8.25419	117	7.32378e-06
SPAC26F1.12c	Glu	1	1597.97	53.2897	2544	4.72829e-05
SPAC26F1.13c	Glu	1	15540	166.376	24740	0.000147622
SPAC26F1.14c	Glu	1	3675.84	71.5068	5852	6.34466e-05
SPAC26H5.02c	Glu	1	759.414	17.9031	1209	1.58851e-05
SPAC26H5.03	Glu	1	630.646	14.6356	1004	1.29859e-05
SPAC26H5.04	Glu	1	1741.81	26.2493	2773	2.32905e-05
SPAC26H5.05	Glu	1	3697.2	38.2087	5886	3.39018e-05
SPAC26H5.06	Glu	1	1133.15	24.2637	1804	2.15287e-05
SPAC26H5.07c	Glu	1	11052	260.036	17595	0.000230725
SPAC26H5.08c	Glu	1	3333.51	123.25	5307	0.000109357
SPAC26H5.09c	Glu	1	21626.6	695.873	34430	0.000617434
SPAC26H5.10c	Glu	1	25861.5	1948.67	41172	0.00172902
SPAC26H5.11	Glu	1	3787.65	46.6804	6030	4.14186e-05
SPAC26H5.12	Glu	1	3449.08	35.552	5491	3.15446e-05
SPAC26H5.13c	Glu	1	1177.12	59.1311	1874	5.24658e-05
SPAC27D7.02c	Glu	1	2836.65	44.9685	4516	3.98997e-05
SPAC27D7.03c	Glu	1	5881.84	93.2429	9364	8.27326e-05
SPAC27D7.04	Glu	1	448.487	55.0454	714	4.88407e-05
SPAC27D7.05c	Glu	1	194.093	21.3958	309	1.89841e-05
SPAC27D7.06	Glu	1	4069.05	141.648	6478	0.000125681
SPAC27D7.07c	Glu	1	1033.91	104.314	1646	9.25557e-05
SPAC27D7.08c	Glu	1	1042.07	32.1406	1659	2.85177e-05
SPAC27D7.09c	Glu	1	1756.26	54.4503	2796	4.83127e-05
SPAC27D7.11c	Glu	1	68204.6	1750	108583	0.00155274
SPAC27D7.12c	Glu	1	825.368	40.2717	1314	3.57323e-05
SPAC27D7.13c	Glu	1	469.844	8.3363	748	7.39664e-06
SPAC27D7.14c	Glu	1	4539.52	51.966	7227	4.61084e-05
SPAC27E2.01	Glu	1	462.935	11.202	737	9.93934e-06
SPAC27E2.02	Glu	1	739.313	31.3231	1177	2.77924e-05
SPAC27E2.03c	Glu	1	18891.8	572.298	30076	0.000507788
SPAC27E2.04c	Glu	1	38.3162	2.42642	61	2.15292e-06
SPAC27E2.05	Glu	1	1423.98	36.6155	2267	3.24882e-05
SPAC27E2.06c	Glu	1	1573.48	34.6903	2505	3.078e-05
SPAC27E2.07	Glu	1	846.096	25.8284	1347	2.2917e-05
SPAC27E2.08	Glu	1	0.628134	0.00560581	1	4.97393e-09
SPAC27E2.09	Glu	1	3062.78	15.7782	4876	1.39997e-05
SPAC27E2.10c	Glu	1	499.994	17.3546	796	1.53983e-05
SPAC27E2.11c	Glu	1	0	0	0	0
SPAC27E2.12	Glu	1	1.8844	0.291357	3	2.58515e-07
SPAC27E2.14	Glu	1	165.199	56.193	263	4.98589e-05
SPAC27F1.02c	Glu	1	7024.42	516.224	11183	0.000458035
SPAC27F1.03c	Glu	1	766.951	40.9454	1221	3.633e-05
SPAC27F1.04c	Glu	1	282.032	7.59659	449	6.7403e-06
SPAC27F1.05c	Glu	1	380.021	9.32842	605	8.27692e-06
SPAC27F1.06c	Glu	1	6295.16	206.463	10022	0.000183191
SPAC27F1.07	Glu	1	8801.41	232.337	14012	0.000206148
SPAC27F1.08	Glu	1	4741.78	108.147	7549	9.59564e-05
SPAC27F1.09c	Glu	1	7918.88	80.7859	12607	7.16797e-05
SPAC27F1.10	Glu	1	23.2409	2.71266	37	2.40689e-06
SPAC29A4.02c	Glu	1	43162.8	1253.34	68716	0.00111206
SPAC29A4.03c	Glu	1	2142.56	93.4359	3411	8.29038e-05
SPAC29A4.04c	Glu	1	28372.8	711.133	45170	0.000630974
SPAC29A4.05	Glu	1	956.648	79.0919	1523	7.01766e-05
SPAC29A4.06c	Glu	1	1278.25	42.7473	2035	3.79288e-05
SPAC29A4.07	Glu	1	126.883	11.0262	202	9.78331e-06
SPAC29A4.08c	Glu	1	5465.39	133.062	8701	0.000118063
SPAC29A4.09	Glu	1	2874.97	167.782	4577	0.00014887
SPAC29A4.10	Glu	1	722.982	15.4531	1151	1.37112e-05
SPAC29A4.11	Glu	1	1657.02	20.3375	2638	1.80451e-05
SPAC29A4.12c	Glu	1	327.258	25.8021	521	2.28937e-05
SPAC29A4.13	Glu	1	635.671	32.0673	1012	2.84527e-05
SPAC29A4.14c	Glu	1	940.944	32.2832	1498	2.86443e-05
SPAC29A4.15	Glu	1	12489.2	329.686	19883	0.000292523
SPAC29A4.16	Glu	1	9585.32	179.147	15260	0.000158954
SPAC29A4.17c	Glu	1	1050.87	84.5335	1673	7.50049e-05
SPAC29A4.18	Glu	1	2875.6	79.2477	4578	7.03149e-05
SPAC29A4.19c	Glu	1	1111.17	12.0591	1769	1.06998e-05
SPAC29A4.20	Glu	1	2182.14	47.6681	3474	4.22949e-05
SPAC29A4.22	Glu	1	165.827	26.6788	264	2.36716e-05
SPAC29A4.23	Glu	1	21.3565	1.38938	34	1.23277e-06
SPAC29B12.01	Glu	1	5671.42	42.0687	9029	3.73267e-05
SPAC29B12.02c	Glu	1	3128.11	46.6098	4980	4.13559e-05
SPAC29B12.03	Glu	1	4001.84	381.147	6371	0.000338184
SPAC29B12.04	Glu	1	76931.9	3083.85	122477	0.00273623
SPAC29B12.05c	Glu	1	496.854	19.0814	791	1.69305e-05
SPAC29B12.06c	Glu	1	1523.22	63.854	2425	5.66564e-05
SPAC29B12.07	Glu	1	5140.02	30.6582	8183	2.72024e-05
SPAC29B12.08	Glu	1	3749.33	64.6915	5969	5.73994e-05
SPAC29B12.10c	Glu	1	1715.43	23.9705	2731	2.12685e-05
SPAC29B12.11c	Glu	1	621.852	42.305	990	3.75364e-05
SPAC29B12.12	Glu	1	82.2855	8.59332	131	7.62468e-06
SPAC29B12.13	Glu	1	1038.93	89.6295	1654	7.95265e-05
SPAC29B12.14c	Glu	1	2908.26	58.5852	4630	5.19815e-05
SPAC29E6.01	Glu	1	1364.31	32.0366	2172	2.84254e-05
SPAC29E6.02	Glu	1	782.027	17.146	1245	1.52133e-05
SPAC29E6.03c	Glu	1	1685.91	18.3804	2684	1.63085e-05
SPAC29E6.04	Glu	1	296.479	17.1344	472	1.5203e-05
SPAC29E6.05c	Glu	1	848.609	59.0818	1351	5.24221e-05
SPAC29E6.06c	Glu	1	3773.83	59.5083	6008	5.28005e-05
SPAC29E6.07	Glu	1	10.0501	1.02265	16	9.0738e-07
SPAC29E6.08	Glu	1	3449.71	177.026	5492	0.000157072
SPAC29E6.09	Glu	1	657.656	23.0283	1047	2.04326e-05
SPAC29E6.10c	Glu	1	4446.56	48.7457	7079	4.32511e-05
SPAC2C4.03c	Glu	1	883.156	90.6404	1406	8.04234e-05
SPAC2C4.04c	Glu	1	1341.07	126.713	2135	0.00011243
SPAC2C4.05	Glu	1	2763.16	243.677	4399	0.00021621
SPAC2C4.06c	Glu	1	559.667	14.4534	891	1.28242e-05
SPAC2C4.07c	Glu	1	1123.73	14.4164	1789	1.27914e-05
SPAC2C4.08	Glu	1	204.143	9.96066	325	8.83789e-06
SPAC2C4.09	Glu	1	735.545	40.3545	1171	3.58057e-05
SPAC2C4.10c	Glu	1	885.04	63.0941	1409	5.59822e-05
SPAC2C4.11c	Glu	1	2074.1	102.037	3302	9.05351e-05
SPAC2C4.12c	Glu	1	717.957	23.3539	1143	2.07215e-05
SPAC2C4.13	Glu	1	685.922	40.8307	1092	3.62283e-05
SPAC2C4.14c	Glu	1	1042.7	39.6605	1660	3.519e-05
SPAC2C4.15c	Glu	1	5084.11	141.421	8094	0.00012548
SPAC2C4.16c	Glu	1	67285.1	3985.34	107119	0.00353611
SPAC2C4.17c	Glu	1	6129.33	86.7679	9758	7.69875e-05
SPAC2E12.02	Glu	1	11213.4	218.853	17852	0.000194183
SPAC2E12.03c	Glu	1	613.059	25.6996	976	2.28027e-05
SPAC2E12.05	Glu	1	240.575	NA	383	NA
SPAC2E1P3.01	Glu	1	2005	68.3962	3192	6.06866e-05
SPAC2E1P3.02c	Glu	1	150.124	3.45035	239	3.06142e-06
SPAC2E1P3.03c	Glu	1	0	0	0	0
SPAC2E1P3.04	Glu	1	3157	52.7142	5026	4.67722e-05
SPAC2E1P3.05c	Glu	1	3087.91	185.67	4916	0.000164741
SPAC2E1P5.01c	Glu	1	1407.65	32.1045	2241	2.84857e-05
SPAC2E1P5.02c	Glu	1	307.157	22.2977	489	1.97843e-05
SPAC2E1P5.03	Glu	1	2150.1	84.203	3423	7.47117e-05
SPAC2E1P5.04c	Glu	1	519.467	17.372	827	1.54138e-05
SPAC2E1P5.05	Glu	1	2187.16	49.598	3482	4.40073e-05
SPAC2F3.01	Glu	1	1658.27	61.6948	2640	5.47405e-05
SPAC2F3.02	Glu	1	1683.4	103.842	2680	9.21367e-05
SPAC2F3.03c	Glu	1	2235.53	62.476	3559	5.54337e-05
SPAC2F3.04c	Glu	1	1396.34	110.092	2223	9.76827e-05
SPAC2F3.05c	Glu	1	2147.59	92.637	3419	8.2195e-05
SPAC2F3.06c	Glu	1	4955.98	64.7669	7890	5.74664e-05
SPAC2F3.07c	Glu	1	8.16574	0.953098	13	8.45665e-07
SPAC2F3.08	Glu	1	5287.63	113.63	8418	0.000100822
SPAC2F3.09	Glu	1	25596.5	545.143	40750	0.000483694
SPAC2F3.10	Glu	1	1246.85	15.6254	1985	1.38641e-05
SPAC2F3.11	Glu	1	2831.63	87.5624	4508	7.76924e-05
SPAC2F3.12c	Glu	1	942.201	40.0615	1500	3.55458e-05
SPAC2F3.13c	Glu	1	569.089	19.4132	906	1.72249e-05
SPAC2F3.14c	Glu	1	983.029	35.2509	1565	3.12775e-05
SPAC2F3.15	Glu	1	1285.16	25.7581	2046	2.28546e-05
SPAC2F3.16	Glu	1	2263.17	63.2483	3603	5.6119e-05
SPAC2F3.17c	Glu	1	1403.25	219.818	2234	0.00019504
SPAC2F3.18c	Glu	1	1947.84	269.648	3101	0.000239254
SPAC2F7.02c	Glu	1	1347.35	49.2044	2145	4.36581e-05
SPAC2F7.03c	Glu	1	1624.98	17.7812	2587	1.57769e-05
SPAC2F7.04	Glu	1	811.549	21.2347	1292	1.88411e-05
SPAC2F7.05c	Glu	1	12694.6	381.65	20210	0.000338631
SPAC2F7.06c	Glu	1	72.2354	1.69623	115	1.50503e-06
SPAC2F7.07c	Glu	1	2962.28	58.0049	4716	5.14666e-05
SPAC2F7.08c	Glu	1	702.254	13.2079	1118	1.17191e-05
SPAC2F7.09c	Glu	1	871.222	21.0817	1387	1.87054e-05
SPAC2F7.10	Glu	1	1025.11	18.9803	1632	1.68409e-05
SPAC2F7.11	Glu	1	1271.97	28.5722	2025	2.53515e-05
SPAC2F7.13c	Glu	1	6450.31	193.922	10269	0.000172063
SPAC2F7.14c	Glu	1	612.43	22.0946	975	1.96041e-05
SPAC2F7.15	Glu	1	1756.89	80.7583	2797	7.16552e-05
SPAC2F7.16c	Glu	1	4698.44	40.8296	7480	3.62273e-05
SPAC2F7.17	Glu	1	1199.11	35.9592	1909	3.19059e-05
SPAC2G11.02	Glu	1	1977.99	17.8535	3149	1.5841e-05
SPAC2G11.03c	Glu	1	2214.17	47.1565	3525	4.1841e-05
SPAC2G11.04	Glu	1	847.352	33.4041	1349	2.96388e-05
SPAC2G11.05c	Glu	1	445.347	7.55272	709	6.70138e-06
SPAC2G11.06	Glu	1	2616.18	71.9319	4165	6.38237e-05
SPAC2G11.07c	Glu	1	12264.3	351.834	19525	0.000312175
SPAC2G11.08c	Glu	1	287.685	22.3856	458	1.98623e-05
SPAC2G11.09	Glu	1	3746.19	56.1709	5964	4.98393e-05
SPAC2G11.10c	Glu	1	441.578	13.0775	703	1.16034e-05
SPAC2G11.11c	Glu	1	1826.61	30.2034	2908	2.67989e-05
SPAC2G11.12	Glu	1	1729.25	15.4909	2753	1.37447e-05
SPAC2G11.13	Glu	1	1472.97	33.0873	2345	2.93577e-05
SPAC2G11.14	Glu	1	7502.43	91.1419	11944	8.08684e-05
SPAC2G11.15c	Glu	1	1467.95	72.8185	2337	6.46104e-05
SPAC2H10.01	Glu	1	357.408	8.8463	569	7.84915e-06
SPAC2H10.02c	Glu	1	892.578	49.6564	1421	4.40591e-05
SPAC2H10.04	Glu	1	0.628134	0.0598252	1	5.30817e-08
SPAC30.01c	Glu	1	5714.13	37.3169	9097	3.31106e-05
SPAC30.02c	Glu	1	1580.38	66.72	2516	5.91993e-05
SPAC30.03c	Glu	1	1217.32	65.5777	1938	5.81858e-05
SPAC30.04c	Glu	1	8464.1	68.5498	13475	6.08228e-05
SPAC30C2.02	Glu	1	1829.13	68.2645	2912	6.05698e-05
SPAC30C2.03	Glu	1	380.649	21.4775	606	1.90566e-05
SPAC30C2.04	Glu	1	24519.8	647.267	39036	0.000574307
SPAC30C2.05	Glu	1	1618.7	139.646	2577	0.000123905
SPAC30C2.06c	Glu	1	454.141	11.6024	723	1.02946e-05
SPAC30C2.07	Glu	1	3190.29	45.0552	5079	3.99766e-05
SPAC30C2.08	Glu	1	3932.75	102.229	6261	9.07055e-05
SPAC30D11.01c	Glu	1	1793.32	21.479	2855	1.90579e-05
SPAC30D11.02c	Glu	1	9.42201	1.30433	15	1.15731e-06
SPAC30D11.03	Glu	1	3564.66	56.21	5675	4.9874e-05
SPAC30D11.04c	Glu	1	5552.7	56.9887	8840	5.05649e-05
SPAC30D11.05	Glu	1	355.524	25.4978	566	2.26237e-05
SPAC30D11.06c	Glu	1	988.683	27.5658	1574	2.44586e-05
SPAC30D11.07	Glu	1	579.139	19.3676	922	1.71845e-05
SPAC30D11.08c	Glu	1	3158.26	69.7591	5028	6.18959e-05
SPAC30D11.09	Glu	1	1341.07	24.9467	2135	2.21347e-05
SPAC30D11.10	Glu	1	432.784	10.9627	689	9.72695e-06
SPAC30D11.11	Glu	1	2368.69	63.6572	3771	5.64817e-05
SPAC30D11.12	Glu	1	22857.2	3628.3	36389	0.00321932
SPAC30D11.13	Glu	1	652.631	49.176	1039	4.36329e-05
SPAC30D11.14c	Glu	1	2073.47	46.1409	3301	4.09399e-05
SPAC31A2.02	Glu	1	1277	119.709	2033	0.000106216
SPAC31A2.03	Glu	1	2570.95	141.051	4093	0.000125152
SPAC31A2.04c	Glu	1	5449.69	332.72	8676	0.000295216
SPAC31A2.05c	Glu	1	1097.35	8.22691	1747	7.29958e-06
SPAC31A2.06	Glu	1	2270.7	49.7855	3615	4.41737e-05
SPAC31A2.07c	Glu	1	1292.7	18.1273	2058	1.6084e-05
SPAC31A2.08	Glu	1	885.669	65.0877	1410	5.7751e-05
SPAC31A2.09c	Glu	1	1195.34	31.8365	1903	2.82479e-05
SPAC31A2.10	Glu	1	1441.57	37.2286	2295	3.30322e-05
SPAC31A2.11c	Glu	1	1101.12	31.8185	1753	2.82319e-05
SPAC31A2.12	Glu	1	2061.53	41.1111	3282	3.6477e-05
SPAC31A2.13c	Glu	1	439.694	56.899	700	5.04854e-05
SPAC31A2.14	Glu	1	2476.1	30.6115	3942	2.7161e-05
SPAC31A2.15c	Glu	1	641.325	21.3274	1021	1.89233e-05
SPAC31A2.16	Glu	1	1350.49	14.5899	2150	1.29453e-05
SPAC31F12.01	Glu	1	2345.45	29.7374	3734	2.63854e-05
SPAC31G5.01	Glu	1	1830.38	64.8552	2914	5.75447e-05
SPAC31G5.02	Glu	1	1322.85	67.5923	2106	5.99733e-05
SPAC31G5.03	Glu	1	54800.3	4264.16	87243	0.00378351
SPAC31G5.04	Glu	1	7232.33	237.2	11514	0.000210463
SPAC31G5.05c	Glu	1	7699.04	400.261	12257	0.000355144
SPAC31G5.06	Glu	1	93.5919	4.74147	149	4.20701e-06
SPAC31G5.07	Glu	1	221.103	11.2013	352	9.93871e-06
SPAC31G5.08	Glu	1	876.247	41.3969	1395	3.67307e-05
SPAC31G5.09c	Glu	1	1603	51.1642	2552	4.5397e-05
SPAC31G5.10	Glu	1	222.359	4.64433	354	4.12082e-06
SPAC31G5.11	Glu	1	3696.57	186.479	5885	0.000165459
SPAC31G5.12c	Glu	1	2214.8	110.326	3526	9.78903e-05
SPAC31G5.13	Glu	1	4276.33	164.761	6808	0.00014619
SPAC31G5.14	Glu	1	9474.77	290.723	15084	0.000257953
SPAC31G5.15	Glu	1	725.494	8.9228	1155	7.91702e-06
SPAC31G5.16c	Glu	1	3547.7	178.214	5648	0.000158125
SPAC31G5.17c	Glu	1	20809.4	1708.58	33129	0.00151599
SPAC31G5.18c	Glu	1	811.549	36.5976	1292	3.24724e-05
SPAC31G5.19	Glu	1	3276.35	32.7507	5216	2.9059e-05
SPAC31G5.21	Glu	1	777.63	77.798	1238	6.90286e-05
SPAC323.01c	Glu	1	488.688	15.0336	778	1.3339e-05
SPAC323.02c	Glu	1	6636.86	318.606	10566	0.000282692
SPAC323.03c	Glu	1	665.194	13.7489	1059	1.21991e-05
SPAC323.04	Glu	1	3244.94	79.1642	5166	7.02409e-05
SPAC323.05c	Glu	1	241.203	12.3776	384	1.09824e-05
SPAC323.06c	Glu	1	322.233	7.40597	513	6.57117e-06
SPAC323.07c	Glu	1	1690.31	37.6849	2691	3.3437e-05
SPAC323.08	Glu	1	107.411	6.03191	171	5.35199e-06
SPAC328.01c	Glu	1	3888.15	37.4816	6190	3.32567e-05
SPAC328.02	Glu	1	1255.01	29.5868	1998	2.62518e-05
SPAC328.03	Glu	1	18969	439.363	30199	0.000389838
SPAC328.04	Glu	1	1888.8	30.3057	3007	2.68896e-05
SPAC328.05	Glu	1	1998.72	51.1731	3182	4.54049e-05
SPAC328.06	Glu	1	4829.72	50.3499	7689	4.46744e-05
SPAC328.07c	Glu	1	2336.66	100.067	3720	8.87878e-05
SPAC328.08c	Glu	1	235.55	10.7858	375	9.57003e-06
SPAC328.09	Glu	1	1433.4	57.0741	2282	5.06407e-05
SPAC328.10c	Glu	1	19592.1	1143.39	31191	0.00101451
SPAC32A11.01	Glu	1	1499.98	24.7681	2388	2.19763e-05
SPAC32A11.02c	Glu	1	13892.4	194.125	22117	0.000172243
SPAC32A11.03c	Glu	1	1043.33	13.172	1661	1.16873e-05
SPAC32A11.04c	Glu	1	27540.5	1018.26	43845	0.000903482
SPAC343.01c	Glu	1	1451.62	40.4731	2311	3.5911e-05
SPAC343.02	Glu	1	1259.41	81.9328	2005	7.26973e-05
SPAC343.03	Glu	1	106.783	13.382	170	1.18735e-05
SPAC343.04c	Glu	1	3162.65	74.1191	5035	6.57644e-05
SPAC343.05	Glu	1	17538.8	336.782	27922	0.00029882
SPAC343.06c	Glu	1	2810.27	87.5845	4474	7.7712e-05
SPAC343.07	Glu	1	59.6727	1.16463	95	1.03335e-06
SPAC343.08c	Glu	1	198.49	21.0991	316	1.87208e-05
SPAC343.09	Glu	1	4520.05	130.931	7196	0.000116173
SPAC343.10	Glu	1	3552.1	65.8707	5655	5.84457e-05
SPAC343.11c	Glu	1	3440.29	25.7759	5477	2.28704e-05
SPAC343.12	Glu	1	32715.7	966.482	52084	0.00085754
SPAC343.13	Glu	1	814.689	18.4045	1297	1.63299e-05
SPAC343.14c	Glu	1	6795.78	205.346	10819	0.000182199
SPAC343.15	Glu	1	864.94	23.6722	1377	2.10039e-05
SPAC343.16	Glu	1	12683.9	209.15	20193	0.000185575
SPAC343.17c	Glu	1	854.89	17.6391	1361	1.56508e-05
SPAC343.18	Glu	1	726.751	42.0011	1157	3.72667e-05
SPAC343.19	Glu	1	712.932	13.5803	1135	1.20496e-05
SPAC343.20	Glu	1	50.2507	5.24783	80	4.65629e-06
SPAC343.21	Glu	1	2.51253	0.18813	4	1.66924e-07
SPAC3A11.02	Glu	1	3499.33	71.337	5571	6.32959e-05
SPAC3A11.03	Glu	1	405.774	16.6582	646	1.47805e-05
SPAC3A11.04	Glu	1	358.664	17.0801	571	1.51548e-05
SPAC3A11.05c	Glu	1	1402.62	27.465	2233	2.43691e-05
SPAC3A11.06	Glu	1	2086.66	37.1893	3322	3.29973e-05
SPAC3A11.07	Glu	1	26623.4	574.206	42385	0.000509481
SPAC3A11.08	Glu	1	1084.16	17.5609	1726	1.55815e-05
SPAC3A11.09	Glu	1	5180.22	79.1686	8247	7.02447e-05
SPAC3A11.10c	Glu	1	6455.96	187.465	10278	0.000166334
SPAC3A11.11c	Glu	1	2079.12	73.8886	3310	6.55599e-05
SPAC3A11.12c	Glu	1	7639.36	207.174	12162	0.000183821
SPAC3A11.13	Glu	1	1344.83	139.224	2141	0.00012353
SPAC3A11.14c	Glu	1	586.049	8.37589	933	7.43176e-06
SPAC3A12.02	Glu	1	489.944	20.3239	780	1.8033e-05
SPAC3A12.03c	Glu	1	633.159	24.3161	1008	2.15752e-05
SPAC3A12.04c	Glu	1	151.38	7.26708	241	6.44793e-06
SPAC3A12.05c	Glu	1	2208.52	22.4153	3516	1.98887e-05
SPAC3A12.06c	Glu	1	5415.14	86.6521	8621	7.68847e-05
SPAC3A12.07	Glu	1	1032.02	99.0856	1643	8.79166e-05
SPAC3A12.08	Glu	1	676.5	37.4603	1077	3.32378e-05
SPAC3A12.09c	Glu	1	143.843	5.88487	229	5.22153e-06
SPAC3A12.10	Glu	1	49353.1	3319.58	78571	0.0029454
SPAC3A12.11c	Glu	1	2043.95	62.5551	3254	5.55039e-05
SPAC3A12.12	Glu	1	1114.31	46.2239	1774	4.10135e-05
SPAC3A12.13c	Glu	1	3858.63	167.048	6143	0.000148219
SPAC3A12.14	Glu	1	5020.67	395.847	7993	0.000351227
SPAC3A12.15	Glu	1	3425.84	53.8783	5454	4.78051e-05
SPAC3A12.16c	Glu	1	2912.66	210.159	4637	0.00018647
SPAC3A12.17c	Glu	1	1391.32	41.8286	2215	3.71137e-05
SPAC3A12.18	Glu	1	18629.8	442.704	29659	0.000392802
SPAC3A12.19	Glu	1	145.099	18.3772	231	1.63057e-05
SPAC3C7.01c	Glu	1	1489.93	28.984	2372	2.57169e-05
SPAC3C7.02c	Glu	1	399.493	12.3857	636	1.09896e-05
SPAC3C7.03c	Glu	1	425.247	14.4237	677	1.27978e-05
SPAC3C7.04	Glu	1	1230.51	18.6859	1959	1.65796e-05
SPAC3C7.05c	Glu	1	2842.31	76.3852	4525	6.77751e-05
SPAC3C7.06c	Glu	1	755.017	13.8076	1202	1.22512e-05
SPAC3C7.07c	Glu	1	1373.73	41.7212	2187	3.70184e-05
SPAC3C7.08c	Glu	1	9144.37	102.899	14558	9.13001e-05
SPAC3C7.09	Glu	1	276.379	7.65207	440	6.78953e-06
SPAC3C7.10	Glu	1	677.128	27.8943	1078	2.47501e-05
SPAC3C7.11c	Glu	1	32208.8	683.525	51277	0.000606478
SPAC3C7.12	Glu	1	2097.97	54.0629	3340	4.79689e-05
SPAC3C7.13c	Glu	1	2134.4	53.6092	3398	4.75664e-05
SPAC3C7.14c	Glu	1	30086.4	1764.48	47898	0.00156558
SPAC3F10.02c	Glu	1	1476.74	20.8802	2351	1.85266e-05
SPAC3F10.03	Glu	1	15104.7	275.386	24047	0.000244345
SPAC3F10.04	Glu	1	3504.36	83.6085	5579	7.41841e-05
SPAC3F10.05c	Glu	1	976.748	35.5613	1555	3.15528e-05
SPAC3F10.06c	Glu	1	175.249	4.59561	279	4.07759e-06
SPAC3F10.07c	Glu	1	9.42201	0.648395	15	5.75308e-07
SPAC3F10.08c	Glu	1	980.517	44.8977	1561	3.98368e-05
SPAC3F10.09	Glu	1	2452.86	110.197	3905	9.77756e-05
SPAC3F10.10c	Glu	1	172.737	5.61883	275	4.98548e-06
SPAC3F10.11c	Glu	1	4616.78	37.1632	7350	3.29742e-05
SPAC3F10.12c	Glu	1	844.84	49.7927	1345	4.418e-05
SPAC3F10.13	Glu	1	3956.61	76.8432	6299	6.81815e-05
SPAC3F10.15c	Glu	1	243.716	31.8849	388	2.82908e-05
SPAC3F10.16c	Glu	1	4469.8	86.2473	7116	7.65255e-05
SPAC3F10.17	Glu	1	1675.86	51.5548	2668	4.57436e-05
SPAC3F10.18c	Glu	1	4036.39	1848.25	6426	0.00163992
SPAC3F10.19	Glu	1	4632.49	535.45	7375	0.000475094
SPAC3G6.01	Glu	1	6155.71	52.7616	9800	4.68144e-05
SPAC3G6.02	Glu	1	1407.65	232.758	2241	0.000206521
SPAC3G6.03c	Glu	1	1751.87	86.1842	2789	7.64695e-05
SPAC3G6.04	Glu	1	1594.2	51.2961	2538	4.5514e-05
SPAC3G6.05	Glu	1	3871.82	222.683	6164	0.000197582
SPAC3G6.06c	Glu	1	853.006	26.6544	1358	2.36499e-05
SPAC3G6.07	Glu	1	65.954	6.2318	105	5.52935e-06
SPAC3G6.08	Glu	1	437.809	28.4824	697	2.52718e-05
SPAC3G6.09c	Glu	1	2459.77	34.4523	3916	3.05688e-05
SPAC3G6.10c	Glu	1	128.767	9.58139	205	8.50137e-06
SPAC3G6.11	Glu	1	510.045	7.18611	812	6.37609e-06
SPAC3G6.13c	Glu	1	3209.14	1469.46	5109	0.00130382
SPAC3G9.01	Glu	1	464.819	11.9521	740	1.06049e-05
SPAC3G9.02	Glu	1	527.632	26.5049	840	2.35172e-05
SPAC3G9.03	Glu	1	22796.2	1938.55	36292	0.00172004
SPAC3G9.04	Glu	1	432.784	26.0225	689	2.30892e-05
SPAC3G9.05	Glu	1	1237.42	22.3212	1970	1.98051e-05
SPAC3G9.06	Glu	1	11535	274.658	18364	0.000243698
SPAC3G9.07c	Glu	1	912.05	24.9616	1452	2.21479e-05
SPAC3G9.08	Glu	1	359.921	15.088	573	1.33873e-05
SPAC3G9.09c	Glu	1	12395.6	480.697	19734	0.000426513
SPAC3G9.10c	Glu	1	1104.26	54.1012	1758	4.80029e-05
SPAC3G9.11c	Glu	1	685.294	14.2884	1091	1.26778e-05
SPAC3G9.12	Glu	1	458.538	3.73141	730	3.31081e-06
SPAC3G9.13c	Glu	1	864.312	28.4253	1376	2.52212e-05
SPAC3G9.14	Glu	1	3297.07	51.1771	5249	4.54084e-05
SPAC3G9.15c	Glu	1	3385.64	174.49	5390	0.000154822
SPAC3G9.16c	Glu	1	430.9	32.8847	686	2.91779e-05
SPAC3G9.17	Glu	1	312.811	28.0009	498	2.48447e-05
SPAC3H1.01c	Glu	1	999.361	17.2182	1591	1.52773e-05
SPAC3H1.02c	Glu	1	1888.8	21.6845	3007	1.92402e-05
SPAC3H1.03	Glu	1	505.648	40.9518	805	3.63357e-05
SPAC3H1.04c	Glu	1	1827.24	36.1361	2909	3.20629e-05
SPAC3H1.05	Glu	1	7237.99	181.412	11523	0.000160963
SPAC3H1.06c	Glu	1	1180.26	23.816	1879	2.11315e-05
SPAC3H1.07	Glu	1	8454.05	310.644	13459	0.000275628
SPAC3H1.08c	Glu	1	1077.88	60.5307	1716	5.37077e-05
SPAC3H1.09c	Glu	1	2764.42	50.0934	4401	4.44469e-05
SPAC3H1.10	Glu	1	1120.59	32.1471	1784	2.85234e-05
SPAC3H1.11	Glu	1	1769.45	36.1337	2817	3.20607e-05
SPAC3H1.12c	Glu	1	1279.51	13.4567	2037	1.19399e-05
SPAC3H1.13	Glu	1	885.669	30.5629	1410	2.71178e-05
SPAC3H1.14	Glu	1	484.919	29.4548	772	2.61346e-05
SPAC3H5.04	Glu	1	2840.42	97.4531	4522	8.64682e-05
SPAC3H5.05c	Glu	1	3002.48	255.326	4780	0.000226545
SPAC3H5.06c	Glu	1	1814.68	15.3659	2889	1.36338e-05
SPAC3H5.07	Glu	1	33698.1	1598.36	53648	0.00141819
SPAC3H5.08c	Glu	1	1860.53	23.7155	2962	2.10423e-05
SPAC3H5.09c	Glu	1	3437.15	15.1557	5472	1.34474e-05
SPAC3H5.10	Glu	1	36448.1	3390.06	58026	0.00300793
SPAC3H5.11	Glu	1	1188.43	35.9103	1892	3.18625e-05
SPAC3H5.12c	Glu	1	70878	2860.43	112839	0.002538
SPAC3H5.13	Glu	1	258.163	20.9083	411	1.85515e-05
SPAC3H8.02	Glu	1	3309.01	88.5279	5268	7.85491e-05
SPAC3H8.03	Glu	1	1165.19	130.868	1855	0.000116116
SPAC3H8.04	Glu	1	2150.73	75.5316	3424	6.70177e-05
SPAC3H8.05c	Glu	1	3269.44	36.2419	5205	3.21567e-05
SPAC3H8.06	Glu	1	1452.25	40.8735	2312	3.62663e-05
SPAC3H8.07c	Glu	1	1347.98	94.4007	2146	8.37599e-05
SPAC3H8.08c	Glu	1	1043.96	22.0367	1662	1.95527e-05
SPAC3H8.09c	Glu	1	683.41	11.0098	1088	9.76876e-06
SPAC3H8.10	Glu	1	5895.66	244.564	9386	0.000216997
SPAC458.02c	Glu	1	14494.8	367.944	23076	0.00032647
SPAC458.03	Glu	1	1372.47	18.803	2185	1.66835e-05
SPAC458.04c	Glu	1	161.43	5.32378	257	4.72369e-06
SPAC458.05	Glu	1	2216.06	32.8964	3528	2.91883e-05
SPAC458.06	Glu	1	608.033	19.8325	968	1.7597e-05
SPAC458.07	Glu	1	1608.65	44.0266	2561	3.90639e-05
SPAC4A8.02c	Glu	1	364.946	30.3833	581	2.69585e-05
SPAC4A8.03c	Glu	1	1472.97	45.6674	2345	4.05198e-05
SPAC4A8.04	Glu	1	5373.68	136.7	8555	0.000121291
SPAC4A8.05c	Glu	1	3371.19	19.0666	5367	1.69174e-05
SPAC4A8.06c	Glu	1	2754.99	56.648	4386	5.02626e-05
SPAC4A8.07c	Glu	1	1943.45	50.4083	3094	4.47263e-05
SPAC4A8.08c	Glu	1	2279.5	28.5365	3629	2.53199e-05
SPAC4A8.09c	Glu	1	984.914	39.8835	1568	3.53878e-05
SPAC4A8.10	Glu	1	2722.33	41.2345	4334	3.65866e-05
SPAC4A8.11c	Glu	1	42947.4	277.43	68373	0.000246158
SPAC4A8.12c	Glu	1	3064.66	109.567	4879	9.72169e-05
SPAC4A8.13c	Glu	1	4219.8	184.023	6718	0.00016328
SPAC4A8.14	Glu	1	3760.01	109.181	5986	9.68742e-05
SPAC4A8.15c	Glu	1	7043.26	655.098	11213	0.000581255
SPAC4A8.16c	Glu	1	31148.5	403.519	49589	0.000358035
SPAC4C5.01	Glu	1	867.453	41.3093	1381	3.66529e-05
SPAC4C5.02c	Glu	1	818.458	48.2378	1303	4.28004e-05
SPAC4C5.03	Glu	1	3588.53	140.999	5713	0.000125106
SPAC4C5.04	Glu	1	1407.65	54.4109	2241	4.82777e-05
SPAC4D7.01c	Glu	1	3421.44	22.4799	5447	1.99459e-05
SPAC4D7.02c	Glu	1	2429.62	92.71	3868	8.22597e-05
SPAC4D7.03	Glu	1	886.297	14.9882	1411	1.32987e-05
SPAC4D7.04c	Glu	1	2023.85	90.9231	3222	8.06742e-05
SPAC4D7.05	Glu	1	17656.8	638.939	28110	0.000566918
SPAC4D7.06c	Glu	1	1550.86	69.6738	2469	6.18202e-05
SPAC4D7.07c	Glu	1	951.623	18.8196	1515	1.66983e-05
SPAC4D7.08c	Glu	1	12052.6	268.709	19188	0.000238421
SPAC4D7.09	Glu	1	4754.34	123.316	7569	0.000109416
SPAC4D7.10c	Glu	1	867.453	21.7876	1381	1.93317e-05
SPAC4D7.11	Glu	1	521.351	22.0102	830	1.95292e-05
SPAC4D7.12c	Glu	1	1493.07	64.1718	2377	5.69383e-05
SPAC4D7.13	Glu	1	3693.43	63.1775	5880	5.60562e-05
SPAC4D7.14	Glu	1	366.202	35.7358	583	3.17076e-05
SPAC4D7.15	Glu	1	38.3162	4.85285	61	4.30583e-06
SPAC4F10.02	Glu	1	4418.92	112.412	7035	9.97409e-05
SPAC4F10.03c	Glu	1	1148.86	47.8236	1829	4.24329e-05
SPAC4F10.04	Glu	1	1060.29	38.7212	1688	3.43566e-05
SPAC4F10.05c	Glu	1	519.467	28.1111	827	2.49424e-05
SPAC4F10.06	Glu	1	2390.05	73.1475	3805	6.49023e-05
SPAC4F10.07c	Glu	1	2421.46	37.9819	3855	3.37006e-05
SPAC4F10.08	Glu	1	189.068	5.64142	301	5.00552e-06
SPAC4F10.09c	Glu	1	5388.76	74.5123	8579	6.61133e-05
SPAC4F10.10c	Glu	1	5067.15	178.48	8067	0.000158362
SPAC4F10.11	Glu	1	2055.25	52.0607	3272	4.61924e-05
SPAC4F10.12	Glu	1	520.723	22.0619	829	1.95751e-05
SPAC4F10.13c	Glu	1	5305.85	63.6133	8447	5.64428e-05
SPAC4F10.14c	Glu	1	24957	1954.75	39732	0.00173441
SPAC4F10.15c	Glu	1	1813.42	37.5468	2887	3.33146e-05
SPAC4F10.16c	Glu	1	1695.33	14.7541	2699	1.3091e-05
SPAC4F10.17	Glu	1	45.8538	4.40246	73	3.90622e-06
SPAC4F10.18	Glu	1	2461.66	74.7625	3919	6.63353e-05
SPAC4F10.19c	Glu	1	293.338	22.531	467	1.99913e-05
SPAC4F10.20	Glu	1	10368.6	1210.21	16507	0.0010738
SPAC4F10.22	Glu	1	419.593	70.3579	668	6.24271e-05
SPAC4F8.01	Glu	1	2211.03	124.754	3520	0.000110692
SPAC4F8.02c	Glu	1	1806.51	76.8113	2876	6.81532e-05
SPAC4F8.03	Glu	1	2861.15	137.907	4555	0.000122362
SPAC4F8.04	Glu	1	2365.55	91.7353	3766	8.13949e-05
SPAC4F8.05c	Glu	1	1417.7	141.834	2257	0.000125846
SPAC4F8.06	Glu	1	925.241	67.5787	1473	5.99612e-05
SPAC4F8.07c	Glu	1	62998	1644.77	100294	0.00145937
SPAC4F8.08	Glu	1	10.0501	0.787174	16	6.98444e-07
SPAC4F8.10c	Glu	1	2996.2	203.833	4770	0.000180857
SPAC4F8.11	Glu	1	1188.43	16.7045	1892	1.48215e-05
SPAC4F8.12c	Glu	1	10327.8	52.0118	16442	4.6149e-05
SPAC4F8.13c	Glu	1	2183.39	17.4457	3476	1.54792e-05
SPAC4F8.14c	Glu	1	9067.11	240.954	14435	0.000213793
SPAC4F8.15	Glu	1	4097.94	84.7005	6524	7.51531e-05
SPAC4G8.02c	Glu	1	3817.8	640.172	6078	0.000568012
SPAC4G8.03c	Glu	1	5910.74	90.1017	9410	7.99455e-05
SPAC4G8.04	Glu	1	2993.06	46.0976	4765	4.09014e-05
SPAC4G8.05	Glu	1	4184	87.8518	6661	7.79492e-05
SPAC4G8.06c	Glu	1	2319.07	65.8934	3692	5.84659e-05
SPAC4G8.07c	Glu	1	881.272	19.8709	1403	1.76311e-05
SPAC4G8.08	Glu	1	1361.17	59.5778	2167	5.28622e-05
SPAC4G8.09	Glu	1	1175.87	15.999	1872	1.41956e-05
SPAC4G8.10	Glu	1	998.105	64.9333	1589	5.7614e-05
SPAC4G8.11c	Glu	1	217.334	9.65463	346	8.56636e-06
SPAC4G8.12c	Glu	1	854.89	19.0595	1361	1.69111e-05
SPAC4G8.13c	Glu	1	1991.81	34.7701	3171	3.08508e-05
SPAC4G9.02	Glu	1	1230.51	44.8003	1959	3.97504e-05
SPAC4G9.03	Glu	1	6486.74	349.443	10327	0.000310054
SPAC4G9.04c	Glu	1	2905.75	54.1376	4626	4.80352e-05
SPAC4G9.05	Glu	1	73.4916	1.50334	117	1.33388e-06
SPAC4G9.06c	Glu	1	645.093	67.369	1027	5.97752e-05
SPAC4G9.07	Glu	1	79.773	1.84772	127	1.63944e-06
SPAC4G9.08c	Glu	1	3064.66	31.2915	4879	2.77643e-05
SPAC4G9.09c	Glu	1	15888	213.49	25294	0.000189426
SPAC4G9.10	Glu	1	3403.23	123.526	5418	0.000109602
SPAC4G9.11c	Glu	1	2349.85	124.892	3741	0.000110814
SPAC4G9.12	Glu	1	5248.06	322.062	8355	0.000285759
SPAC4G9.13c	Glu	1	845.468	33.6642	1346	2.98696e-05
SPAC4G9.14	Glu	1	1157.02	62.0485	1842	5.50544e-05
SPAC4G9.15	Glu	1	6011.87	209.279	9571	0.000185689
SPAC4G9.16c	Glu	1	55037.1	3430.55	87620	0.00304386
SPAC4G9.17c	Glu	1	1894.45	58.1292	3016	5.15768e-05
SPAC4G9.19	Glu	1	662.681	29.1124	1055	2.58308e-05
SPAC4G9.20c	Glu	1	1516.94	60.4005	2415	5.35921e-05
SPAC4G9.22	Glu	1	3666.42	459.474	5837	0.000407682
SPAC4H3.01	Glu	1	3401.34	103.039	5415	9.14242e-05
SPAC4H3.02c	Glu	1	1699.1	51.6031	2705	4.57864e-05
SPAC4H3.03c	Glu	1	2086.66	38.2191	3322	3.39111e-05
SPAC4H3.04c	Glu	1	555.898	21.3489	885	1.89425e-05
SPAC4H3.05	Glu	1	430.272	5.76862	685	5.11838e-06
SPAC4H3.06	Glu	1	374.368	32.297	596	2.86564e-05
SPAC4H3.07c	Glu	1	2950.97	245.681	4698	0.000217988
SPAC4H3.08	Glu	1	437.809	18.1612	697	1.61141e-05
SPAC4H3.09	Glu	1	3368.05	354.848	5362	0.00031485
SPAC4H3.10c	Glu	1	73282.5	1710.69	116667	0.00151786
SPAC4H3.11c	Glu	1	2653.87	40.3	4225	3.57574e-05
SPAC4H3.13	Glu	1	705.394	94.3592	1123	8.3723e-05
SPAC4H3.14c	Glu	1	1293.33	44.5015	2059	3.94853e-05
SPAC4H3.16	Glu	1	298.364	32.89	475	2.91827e-05
SPAC4H3.17	Glu	1	5.6532	0.773602	9	6.86402e-07
SPAC513.01c	Glu	1	6515.63	92.0177	10373	8.16455e-05
SPAC513.02	Glu	1	206.656	11.3378	329	1.00598e-05
SPAC513.03	Glu	1	1285.16	340.007	2046	0.000301681
SPAC513.04	Glu	1	62.8134	7.40411	100	6.56952e-06
SPAC513.05	Glu	1	4838.51	53.4362	7703	4.74129e-05
SPAC513.06c	Glu	1	1629.38	52.57	2594	4.66443e-05
SPAC513.07	Glu	1	3712.9	131.167	5911	0.000116382
SPAC521.02	Glu	1	1679	70.3842	2673	6.24505e-05
SPAC521.03	Glu	1	6284.48	287.765	10005	0.000255328
SPAC521.04c	Glu	1	3394.43	45.8185	5404	4.06539e-05
SPAC521.05	Glu	1	48108.1	2849.47	76589	0.00252828
SPAC56E4.02c	Glu	1	652.003	47.6216	1038	4.22537e-05
SPAC56E4.03	Glu	1	17235.4	431.985	27439	0.000383292
SPAC56E4.04c	Glu	1	39509.6	206.215	62900	0.00018297
SPAC56E4.05	Glu	1	2024.48	124.881	3223	0.000110805
SPAC56E4.06c	Glu	1	2273.22	44.2213	3619	3.92367e-05
SPAC56E4.07	Glu	1	1072.22	54.0899	1707	4.79929e-05
SPAC56F8.02	Glu	1	2145.08	16.8234	3415	1.49271e-05
SPAC56F8.03	Glu	1	25987.8	286.476	41373	0.000254184
SPAC56F8.04c	Glu	1	3033.89	100.054	4830	8.87759e-05
SPAC56F8.05c	Glu	1	9632.43	399.573	15335	0.000354533
SPAC56F8.06c	Glu	1	562.18	15.0066	895	1.33151e-05
SPAC56F8.07	Glu	1	591.074	38.2443	941	3.39334e-05
SPAC56F8.08	Glu	1	3969.18	141.905	6319	0.00012591
SPAC56F8.09	Glu	1	1746.84	65.1936	2781	5.7845e-05
SPAC56F8.10	Glu	1	6533.22	128.775	10401	0.00011426
SPAC56F8.11	Glu	1	1678.37	107.428	2672	9.53188e-05
SPAC56F8.12	Glu	1	62.1852	1.87427	99	1.663e-06
SPAC56F8.13	Glu	1	132.536	15.4695	211	1.37258e-05
SPAC56F8.14c	Glu	1	163.943	14.7864	261	1.31196e-05
SPAC56F8.15	Glu	1	85.4262	5.74593	136	5.09825e-06
SPAC56F8.16	Glu	1	1481.14	42.593	2358	3.77919e-05
SPAC57A10.02	Glu	1	2196.58	33.6999	3497	2.99012e-05
SPAC57A10.03	Glu	1	614.943	46.9302	979	4.16402e-05
SPAC57A10.04	Glu	1	228.641	7.89	364	7.00064e-06
SPAC57A10.05c	Glu	1	1616.82	31.7637	2574	2.81833e-05
SPAC57A10.06	Glu	1	157.662	14.0076	251	1.24287e-05
SPAC57A10.07	Glu	1	1425.86	54.4084	2270	4.82755e-05
SPAC57A10.08c	Glu	1	2163.92	70.5815	3445	6.26256e-05
SPAC57A10.09c	Glu	1	4110.51	448.964	6544	0.000398357
SPAC57A10.10c	Glu	1	8168.88	325.262	13005	0.000288599
SPAC57A10.11c	Glu	1	2788.91	105.742	4440	9.38228e-05
SPAC57A10.12c	Glu	1	12303.3	329.898	19587	0.000292712
SPAC57A10.14	Glu	1	1320.97	133.276	2103	0.000118253
SPAC57A7.04c	Glu	1	45011.4	819.384	71659	0.000727023
SPAC57A7.05	Glu	1	5579.71	49.6476	8883	4.40513e-05
SPAC57A7.06	Glu	1	5391.27	69.0161	8583	6.12366e-05
SPAC57A7.07c	Glu	1	1573.48	60.6239	2505	5.37904e-05
SPAC57A7.08	Glu	1	4998.69	115.332	7958	0.000102332
SPAC57A7.09	Glu	1	2546.45	81.2773	4054	7.21157e-05
SPAC57A7.10c	Glu	1	14152.5	185.972	22531	0.000165009
SPAC57A7.11	Glu	1	5235.49	47.4356	8335	4.20887e-05
SPAC57A7.12	Glu	1	14477.2	303.98	23048	0.000269715
SPAC57A7.13	Glu	1	1711.66	36.0035	2725	3.19452e-05
SPAC57A7.15c	Glu	1	524.492	45.2483	835	4.01479e-05
SPAC589.02c	Glu	1	492.457	4.78212	784	4.24308e-06
SPAC589.03c	Glu	1	665.822	46.9044	1060	4.16173e-05
SPAC589.04	Glu	1	491.201	21.4997	782	1.90763e-05
SPAC589.05c	Glu	1	539.567	18.5122	859	1.64255e-05
SPAC589.06c	Glu	1	13668.8	801.636	21761	0.000711276
SPAC589.07c	Glu	1	1144.46	36.431	1822	3.23245e-05
SPAC589.08c	Glu	1	452.256	34.5146	720	3.06241e-05
SPAC589.09	Glu	1	1293.33	39.5823	2059	3.51206e-05
SPAC589.10c	Glu	1	33182.4	2616.22	52827	0.00232132
SPAC589.11	Glu	1	34.5474	2.24753	55	1.99419e-06
SPAC589.12	Glu	1	7215.37	88.3761	11487	7.84144e-05
SPAC5D6.01	Glu	1	5116.78	465.016	8146	0.000412599
SPAC5D6.02c	Glu	1	113.064	4.47199	180	3.9679e-06
SPAC5D6.04	Glu	1	1929.63	50.7128	3072	4.49964e-05
SPAC5D6.05	Glu	1	2104.25	120.441	3350	0.000106865
SPAC5D6.06c	Glu	1	673.988	38.0287	1073	3.37421e-05
SPAC5D6.07c	Glu	1	1054.01	25.2991	1678	2.24474e-05
SPAC5D6.08c	Glu	1	305.273	35.6312	486	3.16149e-05
SPAC5D6.09c	Glu	1	361.805	14.1227	576	1.25308e-05
SPAC5D6.10c	Glu	1	5.02507	0.439892	8	3.90307e-07
SPAC5D6.12	Glu	1	1008.78	38.1267	1606	3.38291e-05
SPAC5D6.13	Glu	1	2069.07	72.8788	3294	6.46639e-05
SPAC5H10.01	Glu	1	254.394	10.0287	405	8.89822e-06
SPAC5H10.02c	Glu	1	145.099	7.16786	231	6.3599e-06
SPAC5H10.03	Glu	1	11147.5	603.249	17747	0.000535251
SPAC5H10.04	Glu	1	425.247	13.2186	677	1.17286e-05
SPAC5H10.05c	Glu	1	1209.79	73.1113	1926	6.48702e-05
SPAC5H10.06c	Glu	1	5094.79	159.619	8111	0.000141627
SPAC5H10.07	Glu	1	28.8942	3.82217	46	3.39133e-06
SPAC5H10.08c	Glu	1	1720.46	72.1221	2739	6.39925e-05
SPAC5H10.09c	Glu	1	240.575	10.6871	383	9.48242e-06
SPAC5H10.10	Glu	1	3332.25	100.946	5305	8.9567e-05
SPAC5H10.11	Glu	1	421.478	15.2056	671	1.34916e-05
SPAC5H10.12c	Glu	1	1579.76	50.558	2515	4.48591e-05
SPAC5H10.13c	Glu	1	2833.51	97.216	4511	8.62578e-05
SPAC607.02c	Glu	1	3142.55	161.264	5003	0.000143086
SPAC607.03c	Glu	1	17419.4	1645.91	27732	0.00146038
SPAC607.04	Glu	1	719.841	31.8586	1146	2.82675e-05
SPAC607.05	Glu	1	6282.59	195.802	10002	0.000173732
SPAC607.06c	Glu	1	2626.86	51.0174	4182	4.52667e-05
SPAC607.07c	Glu	1	2431.51	201.027	3871	0.000178368
SPAC607.08c	Glu	1	2810.9	57.6978	4475	5.11941e-05
SPAC607.09c	Glu	1	586.049	17.5746	933	1.55936e-05
SPAC607.10	Glu	1	1584.78	18.3357	2523	1.62689e-05
SPAC630.03	Glu	1	9384.95	261.054	14941	0.000231628
SPAC630.04c	Glu	1	528.26	37.6595	841	3.34145e-05
SPAC630.05	Glu	1	2006.89	32.1139	3195	2.8494e-05
SPAC630.06c	Glu	1	607.405	38.2613	967	3.39484e-05
SPAC630.07c	Glu	1	1216.7	33.6083	1937	2.982e-05
SPAC630.08c	Glu	1	6739.88	266.58	10730	0.000236531
SPAC630.09c	Glu	1	1445.96	61.9234	2302	5.49434e-05
SPAC630.10	Glu	1	1268.2	55.7136	2019	4.94336e-05
SPAC630.11	Glu	1	1722.97	159.012	2743	0.000141088
SPAC630.12	Glu	1	1657.02	46.6368	2638	4.13799e-05
SPAC630.13c	Glu	1	5357.98	47.6035	8530	4.22376e-05
SPAC630.14c	Glu	1	3717.3	73.8827	5918	6.55546e-05
SPAC630.15	Glu	1	6.28134	0.705486	10	6.25964e-07
SPAC631.01c	Glu	1	4459.75	197.379	7100	0.00017513
SPAC631.02	Glu	1	7102.94	116.158	11308	0.000103065
SPAC637.03	Glu	1	9342.86	411.963	14874	0.000365527
SPAC637.04	Glu	1	4646.93	64.1059	7398	5.68799e-05
SPAC637.05c	Glu	1	8558.95	202.177	13626	0.000179388
SPAC637.06	Glu	1	3425.21	117.179	5453	0.000103971
SPAC637.07	Glu	1	22239.1	466.134	35405	0.000413591
SPAC637.08	Glu	1	1689.05	63.2351	2689	5.61072e-05
SPAC637.09	Glu	1	7129.32	134.299	11350	0.000119161
SPAC637.10c	Glu	1	3595.44	175.43	5724	0.000155656
SPAC637.11	Glu	1	1173.35	21.5574	1868	1.91274e-05
SPAC637.12c	Glu	1	891.322	22.8696	1419	2.02918e-05
SPAC637.13c	Glu	1	4006.87	95.5975	6379	8.48218e-05
SPAC644.04	Glu	1	1647.59	64.5237	2623	5.72506e-05
SPAC644.05c	Glu	1	1200.99	101.406	1912	8.99754e-05
SPAC644.06c	Glu	1	1891.94	37.9195	3012	3.36452e-05
SPAC644.07	Glu	1	1371.22	36.2774	2183	3.21882e-05
SPAC644.08	Glu	1	2096.08	114.998	3337	0.000102036
SPAC644.09	Glu	1	1231.14	61.5848	1960	5.4643e-05
SPAC644.10	Glu	1	275.123	27.9951	438	2.48395e-05
SPAC644.11c	Glu	1	1342.32	37.5137	2137	3.32851e-05
SPAC644.12	Glu	1	3765.03	59.1346	5994	5.2469e-05
SPAC644.13c	Glu	1	691.575	36.4312	1101	3.23247e-05
SPAC644.14c	Glu	1	1015.06	33.0183	1616	2.92965e-05
SPAC644.15	Glu	1	9991.72	1081.41	15907	0.000959513
SPAC644.16	Glu	1	3532	99.4082	5623	8.82029e-05
SPAC644.17c	Glu	1	2194.7	100.495	3494	8.91671e-05
SPAC644.18c	Glu	1	1690.94	109.409	2692	9.70761e-05
SPAC652.01	Glu	1	182.159	19.896	290	1.76533e-05
SPAC664.01c	Glu	1	2749.97	99.5117	4378	8.82948e-05
SPAC664.02c	Glu	1	2773.84	49.8093	4416	4.41948e-05
SPAC664.03	Glu	1	2394.45	62.378	3812	5.53467e-05
SPAC664.04c	Glu	1	29732.7	2510.49	47335	0.0022275
SPAC664.05	Glu	1	96211.9	5480.56	153171	0.00486279
SPAC664.06	Glu	1	6700.93	319.108	10668	0.000283138
SPAC664.07c	Glu	1	486.804	13.5728	775	1.20428e-05
SPAC664.08c	Glu	1	1448.48	38.0676	2306	3.37766e-05
SPAC664.09	Glu	1	1072.22	20.2301	1707	1.79498e-05
SPAC664.10	Glu	1	1816.56	26.4387	2892	2.34585e-05
SPAC664.11	Glu	1	63527.6	1120.47	101137	0.000994172
SPAC664.12c	Glu	1	308.414	45.8972	491	4.07237e-05
SPAC664.13	Glu	1	201.631	20.3431	321	1.805e-05
SPAC664.14	Glu	1	4699.07	109.053	7481	9.67604e-05
SPAC664.15	Glu	1	2309.65	42.1736	3677	3.74198e-05
SPAC683.02c	Glu	1	451.628	24.5516	719	2.17841e-05
SPAC683.03	Glu	1	3.7688	0.423292	6	3.75578e-07
SPAC688.02c	Glu	1	145.099	8.18699	231	7.26415e-06
SPAC688.03c	Glu	1	796.474	48.8778	1268	4.33683e-05
SPAC688.04c	Glu	1	6432.09	315.129	10240	0.000279608
SPAC688.06c	Glu	1	685.922	19.4432	1092	1.72516e-05
SPAC688.07c	Glu	1	6009.98	68.8652	9568	6.11028e-05
SPAC688.08	Glu	1	2278.24	23.606	3627	2.09451e-05
SPAC688.09	Glu	1	820.343	26.9792	1306	2.39381e-05
SPAC688.10	Glu	1	881.9	7.08935	1404	6.29024e-06
SPAC688.11	Glu	1	6498.67	70.1442	10346	6.22375e-05
SPAC688.12c	Glu	1	2445.95	173.333	3894	0.000153795
SPAC688.13	Glu	1	1035.79	36.7008	1649	3.25639e-05
SPAC688.14	Glu	1	1016.32	25.7988	1618	2.28908e-05
SPAC688.16	Glu	1	823.483	89.126	1311	7.90797e-05
SPAC694.02	Glu	1	16082.7	111.45	25604	9.88871e-05
SPAC694.03	Glu	1	820.343	39.0659	1306	3.46624e-05
SPAC694.04c	Glu	1	3716.67	136.148	5917	0.000120802
SPAC694.05c	Glu	1	61805.2	8175.7	98395	0.00725414
SPAC694.06c	Glu	1	1916.44	22.3685	3051	1.98471e-05
SPAC6B12.02c	Glu	1	1089.81	6.8685	1735	6.09428e-06
SPAC6B12.03c	Glu	1	240.575	9.45259	383	8.38709e-06
SPAC6B12.04c	Glu	1	2905.12	81.9585	4625	7.27201e-05
SPAC6B12.05c	Glu	1	4606.73	185.286	7334	0.000164401
SPAC6B12.06c	Glu	1	349.87	35.2994	557	3.13205e-05
SPAC6B12.07c	Glu	1	6809.6	172.125	10841	0.000152723
SPAC6B12.08	Glu	1	370.599	11.5803	590	1.0275e-05
SPAC6B12.09	Glu	1	1218.58	47.566	1940	4.22043e-05
SPAC6B12.10c	Glu	1	1100.49	28.795	1752	2.55492e-05
SPAC6B12.11	Glu	1	716.072	25.2222	1140	2.23791e-05
SPAC6B12.12	Glu	1	15303.9	291.051	24364	0.000258244
SPAC6B12.13	Glu	1	1170.84	132.755	1864	0.000117791
SPAC6B12.14c	Glu	1	468.588	35.9916	746	3.19347e-05
SPAC6B12.15	Glu	1	107749	4072.37	171539	0.00361333
SPAC6B12.16	Glu	1	42.7131	1.47396	68	1.30781e-06
SPAC6B12.18	Glu	1	317.208	51.0334	505	4.52809e-05
SPAC6B12.19	Glu	1	152.636	22.4345	243	1.99057e-05
SPAC6C3.02c	Glu	1	7864.86	541.237	12521	0.000480229
SPAC6C3.03c	Glu	1	50.2507	5.92329	80	5.25562e-06
SPAC6C3.04	Glu	1	18778.1	461.9	29895	0.000409834
SPAC6C3.05	Glu	1	77.2605	3.40672	123	3.02271e-06
SPAC6C3.06c	Glu	1	1623.1	18.6882	2584	1.65816e-05
SPAC6C3.07	Glu	1	59.0446	1.3623	94	1.20874e-06
SPAC6C3.08	Glu	1	1084.79	54.9565	1727	4.87618e-05
SPAC6C3.09	Glu	1	1805.26	63.9649	2874	5.67548e-05
SPAC6F12.02	Glu	1	2836.65	59.4566	4516	5.27547e-05
SPAC6F12.03c	Glu	1	1520.71	73.0025	2421	6.47736e-05
SPAC6F12.04	Glu	1	3617.42	323.81	5759	0.00028731
SPAC6F12.05c	Glu	1	1984.9	41.4578	3160	3.67847e-05
SPAC6F12.06	Glu	1	2413.29	139.471	3842	0.00012375
SPAC6F12.07	Glu	1	5382.48	418.826	8569	0.000371616
SPAC6F12.08c	Glu	1	1266.32	25.7709	2016	2.2866e-05
SPAC6F12.09	Glu	1	1055.26	10.3317	1680	9.16708e-06
SPAC6F12.10c	Glu	1	17087.1	153.647	27203	0.000136328
SPAC6F12.11c	Glu	1	732.404	19.0799	1166	1.69292e-05
SPAC6F12.12	Glu	1	1816.56	34.4376	2892	3.05558e-05
SPAC6F12.13c	Glu	1	12209	417.681	19437	0.0003706
SPAC6F12.14	Glu	1	783.283	16.4757	1247	1.46186e-05
SPAC6F12.15c	Glu	1	1070.34	18.9625	1704	1.6825e-05
SPAC6F12.16c	Glu	1	4389.4	46.7418	6988	4.14731e-05
SPAC6F12.17	Glu	1	2774.47	45.0014	4417	3.99288e-05
SPAC6F6.01	Glu	1	2326.61	14.9321	3704	1.3249e-05
SPAC6F6.02c	Glu	1	1200.99	40.9692	1912	3.63511e-05
SPAC6F6.03c	Glu	1	6928.32	153.316	11030	0.000136034
SPAC6F6.04c	Glu	1	336.052	8.16492	535	7.24457e-06
SPAC6F6.05	Glu	1	3763.15	364.241	5991	0.000323184
SPAC6F6.06c	Glu	1	3202.23	32.9789	5098	2.92615e-05
SPAC6F6.07c	Glu	1	114092	8936.25	181637	0.00792895
SPAC6F6.08c	Glu	1	804.011	31.9068	1280	2.83103e-05
SPAC6F6.09	Glu	1	375.624	32.1722	598	2.85458e-05
SPAC6F6.10c	Glu	1	6592.26	246.803	10495	0.000218983
SPAC6F6.11c	Glu	1	740.57	28.4411	1179	2.52352e-05
SPAC6F6.12	Glu	1	2693.44	79.767	4288	7.07757e-05
SPAC6F6.13c	Glu	1	1320.34	20.1785	2102	1.7904e-05
SPAC6F6.15	Glu	1	5830.97	327.452	9283	0.000290541
SPAC6F6.16c	Glu	1	913.935	21.3767	1455	1.89671e-05
SPAC6F6.17	Glu	1	3243.05	27.5587	5163	2.44523e-05
SPAC6F6.19	Glu	1	459.166	44.4433	731	3.94337e-05
SPAC6G10.02c	Glu	1	2346.71	24.8121	3736	2.20153e-05
SPAC6G10.03c	Glu	1	3543.93	98.3491	5642	8.72632e-05
SPAC6G10.04c	Glu	1	9882.43	430.966	15733	0.000382388
SPAC6G10.05c	Glu	1	1838.55	18.0748	2927	1.60374e-05
SPAC6G10.06	Glu	1	2.51253	0.0793438	4	7.04002e-08
SPAC6G10.07	Glu	1	5106.1	77.836	8129	6.90623e-05
SPAC6G10.08	Glu	1	18140.5	490.839	28880	0.000435512
SPAC6G10.09	Glu	1	10061.4	148.066	16018	0.000131376
SPAC6G10.10c	Glu	1	612.43	37.3908	975	3.31761e-05
SPAC6G10.11c	Glu	1	66251.8	5223.52	105474	0.00463472
SPAC6G10.12c	Glu	1	748.107	16.6788	1191	1.47988e-05
SPAC6G9.01c	Glu	1	376.88	46.7385	600	4.14701e-05
SPAC6G9.02c	Glu	1	2851.1	51.7429	4539	4.59104e-05
SPAC6G9.03c	Glu	1	840.443	26.5405	1338	2.35489e-05
SPAC6G9.04	Glu	1	1406.39	12.6942	2239	1.12633e-05
SPAC6G9.05	Glu	1	1102.37	45.8887	1755	4.07161e-05
SPAC6G9.06c	Glu	1	3065.92	30.191	4881	2.67878e-05
SPAC6G9.07c	Glu	1	3577.85	252.045	5696	0.000223634
SPAC6G9.08	Glu	1	1768.2	44.8849	2815	3.98255e-05
SPAC6G9.09c	Glu	1	22838.9	1812.7	36360	0.00160838
SPAC6G9.10c	Glu	1	2667.68	18.815	4247	1.66942e-05
SPAC6G9.11	Glu	1	3436.52	335.352	5471	0.000297551
SPAC6G9.12	Glu	1	5682.73	108.945	9047	9.66648e-05
SPAC6G9.13c	Glu	1	67.2103	6.01626	107	5.33811e-06
SPAC6G9.14	Glu	1	5650.06	98.6305	8995	8.75129e-05
SPAC6G9.15c	Glu	1	459.794	10.97	732	9.73343e-06
SPAC6G9.16c	Glu	1	440.322	19.7818	701	1.7552e-05
SPAC732.01	Glu	1	2752.48	201.039	4382	0.000178377
SPAC732.02c	Glu	1	3700.96	107.729	5892	9.55861e-05
SPAC750.01	Glu	1	236.806	8.64805	377	7.67324e-06
SPAC750.02c	Glu	1	0	0	0	0
SPAC750.03c	Glu	1	0	0	0	0
SPAC750.04c	Glu	1	0	0	0	0
SPAC750.05c	Glu	1	59.6727	2.0592	95	1.82709e-06
SPAC750.06c	Glu	1	1.25627	0.0532253	2	4.72258e-08
SPAC750.07c	Glu	1	0	0	0	0
SPAC750.08c	Glu	1	0	0	0	0
SPAC767.01c	Glu	1	7946.52	139.332	12651	0.000123626
SPAC7D4.02c	Glu	1	1256.9	35.9706	2001	3.1916e-05
SPAC7D4.03c	Glu	1	6478.57	86.9557	10314	7.7154e-05
SPAC7D4.04	Glu	1	2148.22	27.5893	3420	2.44794e-05
SPAC7D4.05	Glu	1	741.198	38.5337	1180	3.41902e-05
SPAC7D4.06c	Glu	1	976.12	28.553	1554	2.53345e-05
SPAC7D4.07c	Glu	1	20148.6	2306.51	32077	0.00204652
[truncated: 165,978 more rows]
