# Supplementary material for: Growth-rate-dependent and nutrient-specific gene expression resource allocation in fission yeast
Source: Life Sci Alliance. 2022 Feb 28;5(5):e202101223. doi: 10.26508/lsa.202101223 (PMC8886410; doi:10.26508/lsa.202101223)
Supplement: Supplementary file 7 [file LSA-2021-01223_TableS7.xlsx]

## Sheet: TableS7
medium	reliability_M	reliability_P	uncorrected	corrected
Trp	0.996028	0.942571	0.699309	0.721732
Gly	0.998433	0.949337	0.769466	0.790351
Phe	0.986725	0.94032	0.75225	0.780956
Ser	0.988661	0.928245	0.765756	0.799347
Ile	0.975221	0.972504	0.779991	0.800926
Pro	0.993366	0.959088	0.789031	0.80837
Glu	0.979971	0.976216	0.784919	0.8025
Amm	0.991659	0.939058	0.811499	0.840932
Table S7. Reliabilities and correlations of protein and transcript levels by growth condition. medium: three-letter abbreviation of growth medium; reliability_M: transcript reliability; reliability_P: protein reliability; uncorrected_correlation: Pearson-correlation of log-transformed protein and transcript abundances; corrected_correlation: estimated underlying correlation after applying Spearma…
