# Supplementary material for: Growth-rate-dependent and nutrient-specific gene expression resource allocation in fission yeast
Source: Life Sci Alliance. 2022 Feb 28;5(5):e202101223. doi: 10.26508/lsa.202101223 (PMC8886410; doi:10.26508/lsa.202101223)
Supplement: Supplementary file 10 [file LSA-2021-01223_TableS10.xlsx]

## Sheet: TableS10
pathway	pval	padj	log2err	ES	NES	size	leadingEdge
cytoplasmic translation (GO:0002181)	1.22797e-59	1.97703e-57	2.01464	0.796978	3.12079	238	SPAC3A12.13c|SPAC4G9.16c|SPAC328.10c|SPBC646.09c|SPAC1783.08c|SPAC2C4.16c|SPAC29A4.15|SPAC22H12.04c|SPAC25G10.08|SPAC16E8.15|SPAC13G6.07c|SPAC3A12.10|SPBC19F8.08|SPAC821.05|SPAC637.07|SPBC11C11.07|SPBC17G9.09|SPAC4A8.16c|SPAC3G9.06|SPBP8B7.03c|SPCC1672.05c|SPBC1709.05|SPBC4C3.07|SPAC11E3.15|SPBC17D11.05|SPAC15A10.04c|SPBC16G5.14c|SPCC330.14c|SPAC1805.12c|SPAC4D7.05|SPBC29A3.12|SPCC1450.04|SPAC180…
ribosome biogenesis (GO:0042254)	5.16625e-58	4.15883e-56	1.98877	0.721519	2.92001	350	SPAC22A12.12c|SPAC3A12.13c|SPAC18B11.02c|SPBC244.02c|SPAC1782.10c|SPAC328.10c|SPBC23E6.04c|SPBC11G11.03|SPAC2C4.16c|SPAC22H12.04c|SPAC22G7.05|SPAC8F11.04|SPAC17H9.05|SPAC926.08c|SPAC13G6.07c|SPBC713.04c|SPBC16C6.12c|SPBC1711.16|SPCC320.11c|SPBC1709.05|SPAC222.06|SPBC20F10.09|SPBC18H10.12c|SPCC330.14c|SPCC23B6.02c|SPAC1805.12c|SPAC31A2.02|SPBC26H8.08c|SPBC29A3.12|SPAC18B11.06|SPCC4G3.18|SPAC1805.1…
structural molecule activity (GO:0005198)	2.49989e-43	1.34161e-41	1.7148	0.717503	2.8321	266	SPAC4G9.16c|SPAC328.10c|SPAC1783.08c|SPAC2C4.16c|SPBC16A3.14|SPAC22H12.04c|SPAC13G6.07c|SPBC2F12.02c|SPAC3A12.10|SPBC19F8.08|SPCC18B5.04|SPBC11C11.07|SPAC29A4.03c|SPBP8B7.03c|SPAC11E3.15|SPBC18H10.12c|SPBC16G5.14c|SPCC330.14c|SPAC1805.12c|SPBC29A3.12|SPAC1805.11c|SPBC839.13c|SPAC18G6.14c|SPBC16A3.15c|SPAC17A5.03|SPAC3H5.07|SPCC31H12.04c|SPAC26A3.07c|SPAPB1E7.12|SPBC215.15|SPAC17G6.06|SPAC13G6.02c…
cytosolic ribosome (GO:0022626)	4.34139e-42	1.74741e-40	1.69047	0.8189	3.07458	149	SPAC4G9.16c|SPAC328.10c|SPAC1783.08c|SPAC2C4.16c|SPAC22H12.04c|SPAC13G6.07c|SPAC3A12.10|SPBC19F8.08|SPBC11C11.07|SPBP8B7.03c|SPAC11E3.15|SPBC18H10.12c|SPBC16G5.14c|SPCC330.14c|SPAC1805.12c|SPBC29A3.12|SPAC1805.11c|SPBC839.13c|SPAC18G6.14c|SPAC17A5.03|SPAC3H5.07|SPCC31H12.04c|SPAC26A3.07c|SPAPB1E7.12|SPAC17G6.06|SPAC13G6.02c|SPBC336.10c|SPCC622.18|SPBC17G9.07|SPBC106.18|SPCC1183.08c|SPAPB17E12.13|…
nucleolus (GO:0005730)	3.64541e-25	1.17382e-23	1.30309	0.577602	2.34422	364	SPAC22A12.12c|SPBC244.02c|SPBC1711.05|SPAC1782.10c|SPBC23E6.04c|SPBC11G11.03|SPAC1783.08c|SPBC1347.02|SPCC364.01|SPAC22G7.05|SPAC8F11.04|SPAC17H9.05|SPAC926.08c|SPBC713.04c|SPBC1711.16|SPCC320.11c|SPAC11E3.15|SPBC1289.07c|SPAC222.06|SPBC20F10.09|SPBC18H10.12c|SPBC32H8.05|SPCC23B6.02c|SPAC1805.12c|SPBC26H8.08c|SPAC18B11.06|SPAC1B3.13|SPAC18G6.14c|SPBC14C8.19|SPAC3H5.07|SPBC1604.06c|SPBC30D10.06|SP…
preribosome (GO:0030684)	2.17741e-17	5.8427e-16	1.07687	0.717192	2.54304	100	SPBC244.02c|SPBC23E6.04c|SPBC11G11.03|SPAC22G7.05|SPAC8F11.04|SPAC17H9.05|SPBC713.04c|SPBC16C6.12c|SPCC320.11c|SPAC222.06|SPCC23B6.02c|SPAC18B11.06|SPAC1B3.13|SPAC18G6.14c|SPBC1604.06c|SPBC9B6.07|SPCC1919.09|SPAC20G8.09c|SPAC1142.04|SPBC19F5.05c|SPBC29A3.16|SPCC1183.07|SPAC4F10.09c|SPCC18.12c|SPCC550.15c|SPCC330.09|SPBC776.17|SPBC1539.10|SPBC13G1.09|SPAC12G12.02|SPAC4F10.06|SPAC23H4.15|SPAC4F8.03…
translation regulator activity (GO:0045182)	3.15512e-11	4.61795e-10	0.851339	0.708155	2.37875	68	SPAC3A12.13c|SPBC646.09c|SPAC25G10.08|SPAC16E8.15|SPAC821.05|SPAC637.07|SPBC17G9.09|SPAC4A8.16c|SPBC4C3.07|SPBC17D11.05|SPAC4D7.05|SPCC1450.04|SPAC29A4.02c|SPBC336.10c|SPBC25H2.07|SPAC1751.03|SPCC1919.09|SPBC4B4.04|SPBC9B6.04c|SPAC1006.07|SPAC5D6.12|SPCC11E10.07c|SPCC794.09c|SPBC18H10.04c|SPAC4D7.09|SPCP1E11.11|SPBC18H10.03|SPBC1271.15c|SPAC343.14c|SPAC8C9.15c|SPAC25B8.04c|SPBC1709.18|SPCP31B10.0…
cytosol (GO:0005829)	1.28862e-09	1.38312e-08	0.788187	0.313224	1.38227	2264	SPAC18B11.02c|SPBC244.02c|SPAC4G9.16c|SPBC106.06|SPAC328.10c|SPBC646.09c|SPBC12D12.03|SPAC2F3.02|SPAC1783.08c|SPAC1D4.04|SPAC2C4.16c|SPAC19A8.14|SPCC576.07|SPAC29A4.15|SPBC36.06c|SPBC11G11.06c|SPAC22H12.04c|SPAC25G10.08|SPAC16E8.15|SPAC23H4.09|SPAC926.08c|SPAC13G6.07c|SPBC713.04c|SPBP8B7.21|SPAC3A12.10|SPAC110.04c|SPBC16C6.12c|SPBC19F8.08|SPBC646.11|SPAC821.05|SPAC637.07|SPBC11C11.07|SPBC337.05c|…
protein-containing complex assembly (GO:0065003)	1.74693e-08	1.48029e-07	0.733762	0.431961	1.74879	353	SPAC3A12.13c|SPAC328.10c|SPBC11G11.03|SPBC646.09c|SPBC1347.02|SPBC11G11.06c|SPAC25G10.08|SPAC926.08c|SPBC713.04c|SPBP4H10.03|SPAC23D3.08|SPAC821.05|SPAC637.07|SPBC17G9.09|SPAC4A8.16c|SPCC320.11c|SPAC630.03|SPBC4C3.07|SPBC20F10.09|SPBC17D11.05|SPCC330.14c|SPAC4D7.05|SPAC29A4.08c|SPAC3A11.13|SPBC4B4.05|SPAC17A5.03|SPCC31H12.04c|SPAC19A8.13|SPBC211.06|SPBC30D10.06|SPCC622.18|SPBC800.06|SPBC106.18|SP…
unfolded protein binding (GO:0051082)	3.39415e-08	2.73229e-07	0.719513	0.691794	2.22316	53	SPBC1347.05c|SPBC106.06|SPBC12D12.03|SPAC1D4.04|SPBC646.11|SPBC337.05c|SPBC1734.11|SPBC1709.05|SPAC664.11|SPAC3A11.13|SPAC926.04c|SPCC4G3.14|SPAC1420.02c|SPAC3C7.11c|SPBC1778.01c|SPCC1739.13|SPAC22A12.15c|SPBC1703.03c|SPAC4F10.14c|SPAC227.10|SPBC25H2.12c|SPBC1A4.08c|SPAC57A7.12|SPBC25H2.05|SPCC550.06c
protein folding (GO:0006457)	9.11698e-08	6.38189e-07	0.704976	0.608228	2.09126	85	SPBC1347.05c|SPBC106.06|SPBC12D12.03|SPAC1D4.04|SPAC110.04c|SPBC646.11|SPBC337.05c|SPBC1734.11|SPBC1709.05|SPAC664.11|SPAC3A11.13|SPAC926.04c|SPCC4G3.14|SPAC8E11.07c|SPAC9E9.13|SPBC1711.08|SPAC57A10.03|SPAC1420.02c|SPAC3C7.11c|SPBC1778.01c|SPAC27F1.06c|SPCC1739.13|SPAC13F5.05|SPAC1782.06c|SPAC2E1P5.03|SPBC16G5.11c|SPAC4F10.14c|SPAC227.10|SPBC25H2.12c|SPBC1A4.08c|SPAC57A7.12|SPBP8B7.25|SPBC25H2.05…
tRNA metabolic process (GO:0006399)	1.94242e-06	1.15826e-05	0.627257	0.474201	1.79687	167	SPAC22A12.12c|SPAC18B11.02c|SPAC57A10.10c|SPAC29A4.15|SPAC3G9.06|SPCC1672.05c|SPBC18H10.12c|SPAC31A2.02|SPAP27G11.04c|SPBC25D12.05|SPBC21C3.07c|SPBC800.08|SPAC20G8.09c|SPAC4G8.06c|SPAC22F3.15|SPAC2F7.13c|SPAC1071.01c|SPAC30.02c|SPAPB18E9.01|SPCC1840.11|SPAPB17E12.07c|SPAC17G8.01c|SPAC6C3.09|SPBC19C7.06|SPCC18.13|SPBC1703.01c|SPAC17D4.04|SPBC2G2.12|SPAC17H9.02|SPBC1773.10c|SPAC959.10|SPAC30.03c|SP…
nucleocytoplasmic transport (GO:0006913)	2.68675e-06	1.54488e-05	0.627257	0.5408	1.92053	103	SPBC1711.05|SPAC17G6.14c|SPBC1709.05|SPCC1840.03|SPCC23B6.02c|SPBC1773.07c|SPBC14F5.06|SPBC1289.03c|SPCC1919.09|SPBP8B7.09c|SPBC12C2.06|SPBC29A3.16|SPCC613.08|SPAC23C11.02c|SPCC550.15c|SPBC1105.07c|SPCC285.13c|SPCC1393.03|SPAC4F10.18|SPAC1071.07c|SPBC29A10.07|SPBC1703.03c|SPBC16H5.08c|SPAC1805.17|SPCC18B5.07c|SPAC1B1.03c|SPCC285.15c|SPBC6B1.12c|SPCC31H12.03c|SPBC30B4.05|SPAC1002.02|SPAC6G9.02c|SP…
protein transporter activity (GO:0140318)	2.92771e-05	0.000138635	0.57561	0.775495	2.04985	20	SPAC222.03c|SPBC19G7.17|SPBC27B12.13|SPBC354.02c|SPCC16A11.09c|SPCC24B10.05|SPAC3A12.16c|SPAC17H9.16|SPAC4G8.02c|SPAC6F12.07|SPBC36B7.03|SPBC19G7.19|SPAC13G6.04|SPAC17C9.09c
catalytic activity, acting on RNA (GO:0140098)	0.000116169	0.000505492	0.538434	0.394111	1.5533	261	SPAC19A8.14|SPAC29A4.15|SPAC17G6.14c|SPAC3G9.06|SPCC1672.05c|SPBC1289.07c|SPBC18H10.12c|SPBC25D12.05|SPBC21C3.07c|SPBC691.04|SPCC285.03|SPAC1687.01|SPBC800.08|SPBC3B9.14c|SPCC18.06c|SPBC3B9.07c|SPAC4G8.06c|SPBC12C2.06|SPBC4F6.07c|SPBC8D2.16c|SPAC1F7.02c|SPAC2F7.13c|SPAC1006.07|SPAPB18E9.01|SPAC16C9.06c|SPAPB17E12.07c|SPBC19C2.03|SPBC14C8.12|SPBC119.11c|SPAC17G8.01c|SPBC17D1.06|SPAC6C3.09|SPBC19C7…
cytoplasmic stress granule (GO:0010494)	0.00026234	0.00100564	0.498493	0.630964	1.87264	37	SPAC25G10.08|SPAC16E8.15|SPBP8B7.21|SPAC637.07|SPBC17D11.05|SPBP8B7.11|SPAC4D7.05|SPBC18H10.13|SPBC12C2.06|SPAC24H6.07|SPAC22A12.04c|SPAC24B11.06c|SPBC3D6.15|SPAC17A5.15c
mitochondrial gene expression (GO:0140053)	0.000489991	0.00167848	0.477271	0.436474	1.63064	147	SPAC19A8.14|SPBC16A3.14|SPBC2F12.02c|SPCC18B5.04|SPAC29A4.03c|SPBC691.04|SPBC3B9.14c|SPBC2F12.10|SPAC22F3.15|SPAC4G9.17c|SPBC13G1.01c|SPBC9B6.04c|SPCC4B3.09c|SPAPB18E9.01|SPAC4F8.05c|SPAC31A2.06|SPBC1347.13c|SPBC1271.15c|SPAC24C9.13c|SPAC24C9.10c|SPAC1486.07c|SPBC2G2.12|SPCC1442.19|SPCC736.03c|SPBC83.06c|SPBC14C8.16c|SPAC1610.02c|SPCC11E10.04|SPBC4F6.08c|SPBC16A3.03c|SPBC18H10.11c|SPCC1183.04c|SP…
catalytic activity, acting on a tRNA (GO:0140101)	0.000802024	0.00258252	0.477271	0.450424	1.59054	98	SPAC19A8.14|SPAC29A4.15|SPAC3G9.06|SPCC1672.05c|SPBC25D12.05|SPBC21C3.07c|SPBC800.08|SPAC4G8.06c|SPAC2F7.13c|SPAPB18E9.01|SPAPB17E12.07c|SPAC6C3.09|SPBC19C7.06|SPBC1703.01c|SPAC17D4.04|SPBC2G2.12|SPBC1773.10c|SPAC959.10|SPBC3H7.11|SPCC736.03c|SPAC17A5.15c|SPAC13D6.03c|SPBC1709.02c|SPBP8B7.01c|SPBC13G1.04c|SPAPB1A10.11c|SPCC18B5.08c|SPAC1805.03c|SPAC23A1.12c|SPBC19C2.13c|SPAC24C9.09|SPCC16C4.05|SP…
mRNA metabolic process (GO:0016071)	0.00128431	0.00405439	0.45506	0.357614	1.42397	286	SPAC22A12.12c|SPBC11G11.03|SPBC11G11.06c|SPAC16E8.15|SPAC23D3.08|SPAC17G6.14c|SPAC458.02c|SPBC20F10.09|SPAC6G10.07|SPAC29A4.08c|SPBC4B4.05|SPBC691.04|SPBP4H10.20|SPAC19G12.17|SPAC19A8.13|SPBC30D10.06|SPCC18.06c|SPAC222.09|SPBC146.07|SPAC1071.01c|SPCC4G3.15c|SPAC16.02c|SPBC1105.07c|SPCC1840.11|SPAC16C9.06c|SPAC20H4.08|SPBC4B4.09|SPAC30D11.09|SPBC1861.08c|SPAC22G7.04|SPBC19C2.14|SPAC607.03c|SPAC27D…
snRNA metabolic process (GO:0016073)	0.00218077	0.0064507	0.431708	0.646004	1.76725	24	SPAC22A12.12c|SPAC1782.10c|SPAP27G11.13c|SPBC119.11c|SPAC29A4.04c|SPCC1739.07|SPBC20F10.01|SPCC126.03|SPAC1782.08c|SPAC27D7.08c|SPBC115.01c|SPBC17D1.03c|SPBC211.08c|SPCC757.08
endoplasmic reticulum membrane (GO:0005789)	0.00607535	0.0163022	0.407018	0.350522	1.36776	234	SPAC2F3.02|SPBC1271.02|SPAC823.07|SPAPB17E12.11|SPAC56F8.11|SPAC589.06c|SPAC56E4.05|SPBC19G7.17|SPBP8B7.22|SPAC1D4.08|SPCC553.06|SPAC27F1.07|SPBC2A9.06c|SPBC354.02c|SPCC61.04c|SPCC126.08c|SPAC25B8.17|SPBC4F6.05c|SPAC823.11|SPAC21E11.08|SPBC29A10.01|SPAC3C7.11c|SPAPB1A10.15|SPAC1851.02|SPBC2G2.03c|SPACUNK4.07c|SPCC1795.10c|SPBC1685.03|SPAC20G4.07c|SPCC338.15|SPAC17G6.11c|SPAC13A11.02c|SPBC13A2.03|…
transferase activity, transferring one-carbon groups (GO:0016741)	0.00874684	0.0227136	0.38073	0.405728	1.46643	117	SPCC4G3.04c|SPAC8F11.09c|SPBC25D12.05|SPBC21C3.07c|SPBC16E9.05|SPBC800.08|SPAC4G8.06c|SPAC890.07c|SPBC8D2.16c|SPAC23C4.06c|SPAPB18E9.01|SPCC306.04c|SPAC24C9.12c|SPBC8D2.10c|SPBC1347.13c|SPBC16H5.11c|SPCC1919.13c|SPAC25A8.03c|SPAC17D4.04|SPBC3B9.04|SPBC26H8.03|SPBC3H7.11|SPCC1739.05|SPAC26A3.06|SPAC16E8.14c|SPAC26A3.17c|SPCC576.14|SPAC13D6.03c|SPBP8B7.08c|SPAC688.14|SPAC630.10|SPAC1687.11|SPAC27D7…
molecular sequestering activity (GO:0140313)	0.0114785	0.0288755	0.38073	0.850454	1.59262	6	SPBC1734.11|SPAC8E11.02c|SPAC8C9.11
protein sequestering activity (GO:0140311)	0.0148248	0.03672	0.38073	0.854781	1.53282	5	SPBC1734.11|SPAC8E11.02c|SPAC8C9.11
nuclear periphery (GO:0034399)	0.0156212	0.0375376	0.38073	0.468846	1.49186	51	SPAC17H9.05|SPCC1840.03|SPAC4D7.05|SPAC20G4.06c|SPBC15D4.10c|SPBP8B7.09c|SPAC1420.03|SPAC31G5.13|SPAC1805.17|SPCC18B5.07c|SPAC1B1.03c|SPAPB8E5.02c|SPBC30B4.05|SPBC3B9.16c|SPBC14F5.03c|SPBC16G5.01|SPAC26A3.15c|SPBC106.16|SPAC926.07c|SPBC428.01c|SPBC1604.08c|SPBP19A11.03c|SPAC22G7.09c|SPAC15F9.02|SPBC19G7.09
snoRNA metabolic process (GO:0016074)	0.0212745	0.0489313	0.352488	0.562904	1.53992	24	SPAC22A12.12c|SPAC222.09|SPAC29A4.04c|SPAC17H9.02|SPCC1739.07|SPCC613.07|SPBP8B7.01c|SPBC115.01c|SPAC1805.18|SPBC211.08c|SPCC16C4.05|SPBC2D10.10c|SPBC1709.20
isomerase activity (GO:0016853)	0.0311812	0.0678403	0.352488	0.418225	1.41706	72	SPAC18B11.02c|SPBC1347.02|SPAC1556.07|SPBC106.15|SPAC57A10.03|SPAC144.12|SPAC27F1.06c|SPAC13F5.05|SPAC3F10.09|SPAC26F1.06|SPAC29A4.04c|SPBP8B7.25|SPAC17H9.14c|SPBC839.17c|SPCC126.03|SPBC23E6.10c|SPCC553.04
nuclear pore (GO:0005643)	0.0357135	0.0746737	0.321776	0.430391	1.39662	57	SPCC1840.03|SPBC1773.07c|SPBC15D4.10c|SPBC215.15|SPBP8B7.09c|SPBC1105.07c|SPCC285.13c|SPAC4F10.18|SPBC29A10.07|SPAC1805.17|SPCC18B5.07c|SPAC1A6.02|SPAC1B1.03c|SPBC6B1.12c|SPBC29A10.06c|SPBC1539.04|SPAC1002.02|SPBC3B9.16c|SPBC1921.03c|SPAC26A3.15c|SPAC15F9.03c
P-body (GO:0000932)	0.0391613	0.0808329	0.321776	0.512958	1.47972	30	SPBP4H10.20|SPBC30D10.06|SPCC18.06c|SPAC22G7.04|SPCC1620.01c|SPAC12B10.04|SPBC19G7.10c|SPBC3D6.08c|SPBC3B9.21|SPBC9B6.05c|SPACUNK4.06c|SPAC29B12.06c|SPBC776.09
protein targeting (GO:0006605)	0.0583596	0.118935	0.234393	0.344373	1.25101	123	SPAC1071.03c|SPAC2F3.02|SPAC56F8.11|SPAC589.06c|SPAC56E4.05|SPAC222.03c|SPBC19G7.17|SPAC664.11|SPBC27B12.13|SPBC18E5.12c|SPBC354.02c|SPCC16A11.09c|SPCC24B10.05|SPCC320.10|SPCC126.15c|SPAC17H9.07|SPAC19B12.09|SPAC167.04|SPBC2G2.03c|SPBC1685.03|SPAC3A12.16c|SPAC1142.06|SPAC17H9.16|SPAC823.17|SPAC4F10.14c|SPBC3B9.03|SPAC17G6.09|SPBC409.21|SPBC25H2.05|SPAC4G8.02c|SPCC550.06c|SPAC6F12.07|SPBC887.22|SP…
transferase activity, transferring alkyl or aryl (other than methyl) groups (GO:0016765)	0.060111	0.120973	0.321776	0.470049	1.39506	37	SPBC36.06c|SPBC2A9.06c|SPAC4D7.04c|SPAC4G8.06c|SPAC23H4.10c|SPBC1271.04c|SPAC56F8.04c|SPBC14F5.05c|SPAC24H6.10c|SPCC191.09c|SPAC6F12.13c|SPCC1183.02|SPBC646.05c
molecular carrier activity (GO:0140104)	0.0673953	0.133958	0.234393	0.480294	1.38549	30	SPBP4H10.03|SPCC1840.03|SPAC1142.06|SPAC1805.17|SPAC9G1.04|SPAC1B1.03c|SPBC119.06|SPBC543.10|SPBC30B4.05|SPBC14F5.03c
peptide N-acetyltransferase activity (GO:0034212)	0.0771993	0.149748	0.216543	0.599338	1.42814	13	SPCC338.07c|SPAC15E1.08|SPCC663.13c|SPAC139.06|SPBC15D4.06|SPBC1215.02c|SPCC16C4.12|SPCC825.04c
signal sequence binding (GO:0005048)	0.0872727	0.161505	0.204295	0.52307	1.39145	21	SPBC19G7.17|SPCC1840.03|SPBP8B7.22|SPBC354.02c|SPCC320.10|SPAC19B12.09|SPAC1B1.03c|SPBC14F5.03c|SPCC1682.05c|SPBC1604.08c|SPAC6B12.12|SPAC22G7.09c
mitochondrion (GO:0005739)	0.0915935	0.167574	0.16318	0.263277	1.11913	731	SPAC18B11.02c|SPAC19A8.14|SPBC16A3.14|SPBC2F12.02c|SPBP4H10.03|SPCC18B5.04|SPAC57A10.12c|SPAC17G6.15c|SPAC4F8.07c|SPAC29A4.03c|SPAC56F8.10|SPAC222.03c|SPAC694.04c|SPAC664.11|SPBC27B12.13|SPAC1D4.08|SPCC4G3.04c|SPBC18E5.12c|SPBC25D12.05|SPAC7D4.13c|SPBC691.04|SPCC4B3.11c|SPAC926.04c|SPAC824.03c|SPBC3B9.14c|SPCC16A11.09c|SPCC4G3.14|SPCC24B10.05|SPBC2F12.10|SPAC823.10c|SPBC3F6.03|SPAC22F3.15|SPAP8A3…
nucleus (GO:0005634)	0.108051	0.195463	0.135741	0.243967	1.07817	2687	SPAC22A12.12c|SPAC18B11.02c|SPBC244.02c|SPAC4G9.16c|SPBC1711.05|SPAC1782.10c|SPBC106.06|SPAC57A10.10c|SPBC1734.06|SPBC23E6.04c|SPBC11G11.03|SPBC646.09c|SPBC12D12.03|SPAC2F3.02|SPAC1783.08c|SPAC1D4.04|SPCC576.07|SPBC1347.02|SPBC36.06c|SPBC11G11.06c|SPCC364.01|SPAC22G7.05|SPAC8F11.04|SPAC23H4.09|SPAC17H9.05|SPAC926.08c|SPBC713.04c|SPBP8B7.21|SPAC110.04c|SPBC16C6.12c|SPAC23D3.08|SPBC646.11|SPAC821.0…
protein methyltransferase activity (GO:0008276)	0.131387	0.227455	0.164406	0.424568	1.24631	35	SPAC8F11.09c|SPAC890.07c|SPAC23C4.06c|SPCC306.04c|SPBC8D2.10c|SPBC16H5.11c|SPAC25A8.03c|SPCC1739.05|SPAC16E8.14c|SPAC26A3.17c|SPBP8B7.08c|SPAC688.14|SPCC4B3.12|SPBC1215.02c|SPAC29B12.05c
protein tag (GO:0031386)	0.151852	0.254668	0.153159	0.589431	1.28259	10	SPAC1805.12c|SPAC11G7.04|SPBC31E1.03|SPAC6G10.11c|SPAC589.10c
protein glycosylation (GO:0006486)	0.217252	0.358283	0.11524	0.337909	1.14286	71	SPBC1271.02|SPAPB17E12.11|SPCC553.06|SPAC27F1.07|SPBC2A9.06c|SPAC4D7.04c|SPCC338.15|SPAC227.01c|SPAC5H10.12c|SPBC1289.13c|SPBC13G1.02|SPAC56F8.06c|SPAC23C4.14|SPBC15D4.04|SPAC4F10.10c|SPAC7D4.15c|SPBC19C7.12c|SPAC1834.05|SPBC1677.02|SPBPJ4664.06|SPBPB2B2.10c|SPBC4C3.09|SPBC1921.06c|SPAC31G5.02|SPAC6F6.05|SPAC7D4.06c|SPBC1734.12c|SPAC22F8.04|SPBC2G2.16|SPBC8D2.17
1,3-beta-glucanosyltransferase activity (GO:0042124)	0.227273	0.369605	0.120985	0.698211	1.25205	5	SPBC342.03|SPAC11E3.13c|SPBC29A10.08
endoplasmic reticulum (GO:0005783)	0.273325	0.427235	0.0891647	0.251913	1.05272	567	SPAC1071.03c|SPBC1347.05c|SPAC2F3.02|SPBC1271.02|SPAC823.07|SPBC36.06c|SPAC23G3.05c|SPAPB17E12.11|SPAC23H4.03c|SPAC56F8.11|SPAC589.06c|SPAC56E4.05|SPBC19G7.17|SPAC458.02c|SPBP8B7.22|SPAC1D4.08|SPCC553.06|SPBC342.03|SPAC27F1.07|SPCC1529.01|SPBC2A9.06c|SPBC354.02c|SPCC61.04c|SPCC126.08c|SPAC25B8.17|SPAC4D7.04c|SPBC16E9.05|SPCC330.20|SPBC4F6.05c|SPBC16D10.06|SPAC823.11|SPBC660.17c|SPAC21E11.08|SPAC1…
protein maturation (GO:0051604)	0.326861	0.491819	0.0908241	0.309903	1.06592	84	SPAC56F8.11|SPAC56E4.05|SPCC338.07c|SPAC15E1.08|SPBC18E5.12c|SPAC25B8.17|SPCC4B3.11c|SPCC663.13c|SPBC1271.04c|SPCC320.12|SPBC1685.03|SPBC3E7.10|SPBC119.06|SPAC1071.02|SPBC887.22|SPBC119.02|SPAC4F10.05c
nucleocytoplasmic carrier activity (GO:0140142)	0.334539	0.495615	0.0959207	0.440357	1.0838	15	SPCC1840.03|SPAC1805.17|SPAC1B1.03c|SPBC30B4.05|SPBC14F5.03c|SPBC1604.08c|SPAC22H10.03c
transcription, DNA-templated (GO:0006351)	0.421801	0.6025	0.0756946	0.277738	1.01459	127	SPBC1289.07c|SPAC1B3.02c|SPAC18G6.11c|SPAC1687.01|SPBC14C8.14c|SPBC3B9.07c|SPAC222.09|SPAC22H12.02|SPBC21H7.02|SPBC1105.07c|SPBC19C2.03|SPBC14C8.12|SPAC5D6.05|SPAC23C4.15|SPBC336.09c|SPCC1259.03|SPCC553.11c|SPBC6B1.12c|SPBC1718.03|SPAC17G8.03c|SPAC20H4.03c|SPAC3A12.07|SPBC11G11.05|SPAC1250.07|SPCC290.02|SPCC1682.07|SPAC2F3.03c|SPAC22A12.05|SPAC1002.08c|SPBC28F2.11|SPAC664.03|SPCC285.17|SPACUNK4.0…
GTPase activity (GO:0003924)	0.450245	0.630343	0.0739901	0.295345	0.999494	75	SPBC26H8.08c|SPBC16A3.15c|SPBC1289.03c|SPBC26H8.07c|SPCC553.08c|SPBC9B6.04c|SPBC1539.08|SPCC794.09c|SPAC23H4.15|SPBC1271.15c|SPBC215.12|SPBC31E1.06|SPBC3B9.03|SPAC23A1.10|SPAC513.01c|SPAC3F10.16c
protein deacetylase activity (GO:0033558)	0.448598	0.630343	0.0813027	0.55067	1.03122	6	SPBC16D10.07c|SPBC36.05c|SPAC1783.04c
tetrapyrrole metabolic process (GO:0033013)	0.561497	0.752572	0.0673624	0.374014	0.937941	16	SPAC2F3.09|SPAC4D7.06c|SPAC22E12.10c|SPAC222.11|SPAC1F5.07c|SPAC1805.06c
disulfide oxidoreductase activity (GO:0015036)	0.590164	0.760245	0.0659816	0.343693	0.908477	20	SPBC3F6.03|SPAC13F5.05|SPAC17H9.14c|SPAC7D4.07c|SPCC777.12c|SPAC15E1.09
ubiquinone biosynthetic process (GO:0006744)	0.590253	0.760245	0.0655321	0.374615	0.910491	14	SPCC4G3.04c|SPAC56F8.04c|SPBC3B8.01c
vitamin metabolic process (GO:0006766)	0.59965	0.76622	0.0632191	0.299944	0.923529	45	SPAC8F11.09c|SPAC23H4.10c|SPCC4B3.18|SPBP4H10.05c|SPAC24C9.12c|SPBPB2B2.09c|SPAC17A5.13
pteridine-containing compound biosynthetic process (GO:0042559)	0.712747	0.869335	0.0562941	0.347762	0.82867	13	SPAC17A5.13|SPAC27D7.04|SPBC30D10.05c|SPBC839.16
generation of precursor metabolites and energy (GO:0006091)	0.722488	0.869367	0.0501934	0.253054	0.903052	111	SPAC4F8.07c|SPAC144.12|SPAC27D7.06|SPBC713.03|SPAC26F1.06|SPBC1815.01|SPAC1805.02c|SPBC660.16|SPBC3B8.01c|SPCC191.07|SPAC22E12.10c|SPAC222.12c|SPAC4H3.10c|SPBC19C2.07|SPAC22F3.07c|SPBC115.03|SPBC31F10.15c|SPBC32F12.11|SPAC4G9.12|SPBC32F12.10|SPCC13B11.01|SPAC3A11.07|SPCC1442.08c|SPBC106.05c|SPAC23C4.11|SPCC1322.14c|SPCC613.10|SPBP4H10.08|SPBC2G5.05|SPAC1556.02c|SPAC25H1.10c|SPCC24B10.21|SPACUNK4.…
pheromone activity (GO:0005186)	0.724528	0.869367	0.057853	0.482473	0.818181	4	SPCC1795.06|SPAC513.03|SPAPB8E5.05|SPBPJ4664.03
sulfur compound metabolic process (GO:0006790)	0.743711	0.880422	0.048215	0.244997	0.892646	125	SPAC56F8.10|SPAC664.11|SPAC23H4.10c|SPBC776.03|SPCC4B3.18|SPBP4H10.05c|SPAC1782.11|SPAC343.01c|SPCC584.01c|SPAC4H3.07c|SPBC14F5.05c|SPCC191.02c|SPCC1753.04|SPAC16C9.02c|SPAC1071.02|SPAC20H4.05c|SPBC3B8.01c|SPBC23E6.10c|SPAC4D7.06c|SPAC7D4.07c|SPAC22E12.10c|SPAC637.08|SPAC13G6.11c|SPAC1783.01
cargo receptor activity (GO:0038024)	0.762264	0.88291	0.0554793	0.452685	0.767665	4	SPCC1795.10c|SPCC970.06
ligase activity (GO:0016874)	0.84051	0.933256	0.0432769	0.235084	0.835546	105	SPAC29A4.15|SPAC3G9.06|SPCC1672.05c|SPAC4C5.04|SPAC22F3.15|SPAC2F7.13c|SPCC4B3.18|SPAC17G8.01c|SPBC19C7.06|SPAC12B10.04|SPBC2G2.12|SPBC1773.10c|SPCC736.03c|SPCC191.02c|SPAC17A5.15c|SPBC1709.02c|SPAPB1A10.11c|SPAC222.12c|SPAC22G7.06c|SPCC18B5.08c|SPAC23A1.12c|SPAC10F6.03c|SPAC22F3.07c|SPAC24C9.09|SPBC17G9.03c|SPBC31F10.15c|SPBC25B2.09c|SPAC24H6.12c
nucleotidyltransferase activity (GO:0016779)	0.836538	0.933256	0.0437126	0.237103	0.835717	95	SPBC1289.07c|SPAC1687.01|SPBC3B9.07c|SPBC19C2.03|SPBC14C8.12|SPAC4D7.09|SPAC31A2.06|SPAC23C4.15|SPAC8C9.15c|SPCC1259.03|SPBC13A2.03|SPBC1718.03|SPAC3A12.07|SPBC1A4.06c|SPBC11G11.05|SPCC794.10|SPBC13G1.02|SPAC1F12.08|SPCC290.02|SPBC29A3.14c|SPAC2F3.03c|SPAC22A12.05|SPBC19C2.13c|SPBPB2B2.10c|SPACUNK4.06c|SPAPB1E7.03|SPBP23A10.07|SPBC12D12.02c
secondary metabolic process (GO:0019748)	0.904236	0.983662	0.0465084	0.331823	0.651999	7	SPBC17G9.06c|SPBC2G5.06c|SPAC22F3.10c|SPAC23G3.03
cell wall (GO:0005618)	0.99005	0.998627	0.0375363	0.206426	0.669982	56	SPBC342.03|SPBC11C11.05|SPAC11E3.13c|SPAC27D7.04|SPAC977.12|SPCC1281.01|SPCC757.12|SPAPB1E7.04c|SPBC32F12.11|SPBC29A10.08|SPBPJ4664.02|SPBPB8B6.05c|SPAC1039.11c|SPCC1795.09|SPBC359.04c
cellular amino acid metabolic process (GO:0006520)	0.992424	0.998627	0.0331626	0.197101	0.752879	185	SPAC29A4.15|SPAC3G9.06|SPAC56F8.10|SPCC1672.05c|SPBC776.03|SPAC2F7.13c|SPAC3F10.09|SPBC19C7.06|SPAC24C9.12c|SPBC3H7.07c|SPBC2D10.09|SPBC2G2.12|SPBC1773.10c|SPCC736.03c|SPBC14F5.05c|SPAC16C9.02c|SPBC582.08|SPAC20H4.05c|SPBC23E6.10c|SPAC17A5.15c|SPBC1709.02c|SPBC21C3.08c|SPAC977.12|SPAC7D4.07c|SPAPYUG7.05|SPAC1783.01|SPBC56F2.12|SPAPB1A10.11c|SPAC9E9.06c|SPAC30C2.04|SPAC22G7.06c|SPBC8D2.18c|SPAC644…
peroxiredoxin activity (GO:0051920)	0.942056	0.998627	0.0453152	0.314027	0.588067	6	SPCC330.06c|SPAC27D7.12c|SPCC576.03c|SPBC32F12.03c|SPBC1773.02c|SPBC17D11.03c
transferase activity, transferring acyl groups (GO:0016746)	0.972843	0.998627	0.0366082	0.209358	0.737907	94	SPCC338.07c|SPAC15E1.08|SPAC20G8.09c|SPCC663.13c|SPAC21E11.08|SPAC1851.02|SPAC2F3.09|SPBC215.09c|SPAC139.06|SPAC1639.01c|SPAC56E4.07|SPAC1A6.09c|SPAC4F10.05c|SPBC25H2.10c|SPBC15D4.06|SPAC1B2.03c|SPBC1215.02c|SPCC16C4.12
transmembrane transport (GO:0055085)	0.974648	0.998627	0.0304894	0.203997	0.819717	319	SPAC1071.03c|SPAC17G6.15c|SPBC1271.10c|SPBC19G7.17|SPAC664.11|SPBC27B12.13|SPCC1529.01|SPBC354.02c|SPCC16A11.09c|SPAC823.10c|SPBC16D10.06|SPAC167.04|SPCC1795.03|SPBC359.03c|SPBC15C4.04c|SPBC2G2.03c|SPAC144.18|SPBC359.01|SPBC530.02|SPACUNK4.07c|SPAC17G8.08c|SPBPB8B6.06c|SPAC3A12.16c|SPBP26C9.03c|SPAC17H9.16|SPBC19C7.11|SPAC823.17|SPAC12B10.09|SPAC1B2.02c|SPAC17G6.09|SPBC409.21|SPAC869.05c|SPBC1604…
oxidoreductase activity (GO:0016491)	1	1	0.0299907	0.161346	0.642751	284	SPBC16A3.14|SPAC57A10.12c|SPAC56F8.10|SPBC3F6.03|SPBC776.03|SPBC29A10.01|SPAC27D7.06|SPAC13F5.05|SPBC713.03|SPAC20G4.07c|SPBPB2B2.09c|SPAC1805.02c|SPAC13A11.02c|SPCC584.01c|SPAC17H9.14c|SPBC21C3.15c|SPAC17H9.12c|SPBC83.07|SPBC660.16|SPBC3B8.01c|SPBC646.07c|SPCC191.09c|SPAC4G9.15|SPAC4D7.06c|SPCC191.07|SPAC7D4.07c|SPCC622.19|SPAC22E12.10c|SPAC222.11|SPAPYUG7.05|SPAC1783.01|SPAC8E11.10|SPBC56F2.12|…
cyclase activity (GO:0009975)	0.97234	0.998627	0.0497903	-0.302225	-0.479426	3	SPAC5H10.01|SPBC19C7.03|SPAC11D3.04c
histone demethylase activity (GO:0032452)	0.980132	0.998627	0.0511148	-0.255001	-0.54246	9	SPCC622.16c|SPAC23E2.02|SPAC1002.05c|SPAC343.11c
iron-sulfur cluster assembly (GO:0016226)	0.980392	0.998627	0.0504983	-0.220743	-0.634786	25	SPAC15A10.01|SPAC144.16|SPBC337.10c|SPAC227.13c
transcription coactivator activity (GO:0003713)	0.985472	0.998627	0.0551352	-0.203163	-0.671202	51	SPAC589.02c|SPCC61.02|SPAC1002.04c|SPAC4D7.10c|SPAC29B12.11c|SPBC14C8.17c|SPBC146.01|SPCC126.04c|SPBC25H2.11c|SPAC29A4.07|SPAC23H4.17c|SPAC26H5.05
transferase activity, transferring aldehyde or ketonic groups (GO:0016744)	0.953191	0.998627	0.0507028	-0.331168	-0.525338	3	SPBP35G2.07|SPCC1020.06c|SPBC2G5.05
transferase activity, transferring sulfur-containing groups (GO:0016782)	0.970982	0.998627	0.052057	-0.233369	-0.55998	14	SPCC4B3.01|SPAPB2B4.02|SPAC23H4.04|SPCC645.03c|SPAC2G11.10c|SPBC8D2.15|SPBC21D10.11c
nucleobase-containing small molecule metabolic process (GO:0055086)	0.921283	0.99548	0.0672065	-0.212727	-0.859726	184	SPCC830.10|SPBC651.02|SPBC725.05c|SPBC1861.05|SPAC14C4.10c|SPCC1672.03c|SPBC30D10.03c|SPCC553.02|SPBC1683.02|SPBC18H10.02|SPBC31F10.02|SPBC14F5.13c|SPBC1683.06c|SPAC644.11c|SPCC61.03|SPCC11E10.05c|SPAC17G8.02|SPBPB2B2.06c|SPAC1805.16c|SPAC1002.17c|SPAC3A12.08|SPAC806.06c|SPCC14G10.01|SPAC1399.04c|SPCC1235.04c|SPAC16E8.17c|SPAC3F10.19|SPAC6G9.05|SPAC15A10.05c|SPCC18.16c|SPBC409.10
deacetylase activity (GO:0019213)	0.887417	0.973545	0.0557104	-0.307228	-0.653563	9	SPBPB2B2.02|SPAC19G12.03|SPAPB2B4.01c|SPBC800.03
transferase activity, transferring glycosyl groups (GO:0016757)	0.888889	0.973545	0.0642141	-0.226533	-0.835796	95	SPAC3H8.06|SPAC22E12.06c|SPCC777.07|SPAC24C9.07c|SPBC21B10.11|SPAC4G8.12c|SPAC5D6.06c|SPBC3D6.07|SPAC56E4.02c|SPAC3F10.06c|SPBC685.05|SPAC1805.16c|SPAC1002.17c|SPAC1399.04c|SPAC31G5.16c|SPAC27E2.07|SPAC22A12.13|SPAC1527.01|SPAC959.04c|SPBC1734.04|SPAC1486.06|SPCC63.04
transmembrane transporter activity (GO:0022857)	0.835526	0.933256	0.0782955	-0.215892	-0.919721	289	SPAC105.01c|SPAC2E1P3.02c|SPBC25H2.08c|SPAC1F7.03|SPCC320.05|SPAC14C4.07|SPAC15A10.01|SPAPB24D3.02c|SPBC29A3.01|SPBC16A3.17c|SPBC887.17|SPCC126.09|SPAC11D3.08c|SPAPB1E7.08c|SPCC1682.11c|SPCPB1C11.02|SPBC1683.03c|SPBC12C2.13c|SPBC3B8.04c|SPCC1393.10|SPBC947.06c|SPBC23G7.16|SPCC1827.07c|SPAC1039.04|SPCC74.04|SPCC584.13|SPAC26F1.08c|SPCC757.11c|SPAC607.09c|SPBC83.13|SPAC323.07c|SPAC1399.02|SPAC1399.…
mitotic cell cycle phase transition (GO:0044772)	0.809735	0.918079	0.0601186	-0.282215	-0.769727	21	SPBC800.02|SPAC19E9.03|SPBC649.05
lipid transfer activity (GO:0120013)	0.79646	0.909433	0.0609039	-0.284751	-0.776644	21	SPBC20F10.07|SPBC27B12.01c|SPBC28F2.06c|SPBC31E1.01c|SPBC646.08c|SPBC1271.12|SPBC16C6.02c|SPAC1565.02c
peroxisome (GO:0005777)	0.785558	0.903392	0.0610364	-0.270225	-0.823136	32	SPCC550.09|SPAC29A4.14c|SPBC725.07|SPBC646.15c|SPAC6G9.05|SPBC725.04|SPBC12C2.08|SPCC553.03
carbohydrate metabolic process (GO:0005975)	0.758152	0.88291	0.0734381	-0.237071	-0.899694	117	SPAC25B8.09|SPAC513.05|SPBC1198.06c|SPAC3G6.09c|SPCC1672.06c|SPAC24C9.07c|SPCC1840.05c|SPBC2D10.05|SPBC16G5.02c|SPAC8F11.10c|SPBC17G9.11c|SPCC306.06c|SPAC9G1.10c|SPBC14C8.05c|SPCC11E10.09c|SPAC23H3.11c|SPAC27E2.07|SPCPJ732.02c|SPAC19G12.03|SPAC1527.01|SPBC660.07|SPAC3A12.18|SPCC63.04
phosphotransferase activity, for other substituted phosphate groups (GO:0016780)	0.759551	0.88291	0.0639272	-0.326776	-0.776627	13	SPBP18G5.02|SPAC22A12.08c|SPCC1450.15
nucleoplasm (GO:0005654)	0.728972	0.869367	0.0826646	-0.225207	-0.937231	235	SPBC2D10.17|SPAC1D4.12|SPAC13A11.04c|SPAC1006.03c|SPBC1604.17c|SPAC23C4.19|SPCC1795.08c|SPAC29E6.08|SPBC32F12.15|SPBC337.12|SPAC1782.09c|SPBC1861.07|SPCC188.07|SPBC1685.08|SPBC428.08c|SPBC651.09c|SPAC6F6.09|SPAC8F11.07c|SPAPB1E7.02c|SPAC17A5.06|SPAC23C4.18c|SPBC354.03|SPCC594.05c|SPCC61.02|SPCC962.03c|SPBC16D10.04c|SPAC1002.04c|SPCC613.12c|SPAC6G9.15c|SPAC3A12.05c|SPBC211.04c|SPAC26A3.03c|SPAC23G…
membrane organization (GO:0061024)	0.707101	0.869032	0.0815265	-0.228702	-0.920971	181	SPBP18G5.02|SPAC24C9.15c|SPAC6F12.03c|SPCC364.05|SPBC20F10.07|SPBC29A10.02|SPAPB8E5.04c|SPAC1142.07c|SPCC970.09|SPBC27B12.01c|SPBC1604.18c|SPAC4F10.16c|SPCC162.06c|SPAC17G6.08|SPAC23C4.16c|SPAC6G9.04|SPAPJ696.01c|SPBC19F8.01c|SPBC3B9.10|SPAC823.05c|SPCC63.03|SPAC1952.13|SPCC645.02|SPCC737.03c|SPBC26H8.02c|SPBC28F2.06c|SPAC22A12.08c|SPAC6G10.05c|SPCC1442.15c|SPBC30D10.09c|SPBC31E1.01c|SPBC31E1.04
peroxisome organization (GO:0007031)	0.700441	0.867469	0.0668966	-0.299548	-0.838249	23	SPCC550.09|SPAC29A4.14c|SPBC725.07|SPBC646.15c|SPBC12C2.08|SPCC553.03
actin binding (GO:0003779)	0.673516	0.84059	0.0706196	-0.276807	-0.898628	43	SPAC1F5.04c|SPAC15A10.16|SPAC16E8.01|SPAC4F8.13c|SPAC25G10.09c|SPAC23C4.02|SPCC1919.10c|SPBC2D10.14c|SPBC1778.08c|SPCC645.05c|SPAPJ760.02c|SPAC4A8.05c|SPAC15A10.08|SPAC4F10.15c|SPCC306.09c
lyase activity (GO:0016829)	0.643045	0.80883	0.0802023	-0.256231	-0.928462	83	SPBC1683.11c|SPBC1861.05|SPAC2F7.06c|SPAC31G5.15|SPBC31F10.03|SPCC61.03|SPAC29B12.04|SPBC12C2.12c|SPBC1105.15c|SPAC5H10.02c|SPBC725.04|SPCC1322.13|SPAC1834.02|SPAC13A11.06|SPBC21H7.07c|SPBC23E6.06c|SPAC24C9.06c|SPAC5H10.01|SPCC18.18c|SPAC29B12.13|SPAC23H3.09c|SPAC1039.06|SPBC26H8.12|SPBC1539.09c|SPBC418.01c
exonuclease activity (GO:0004527)	0.606132	0.768404	0.0776799	-0.285623	-0.93194	46	SPBC685.02|SPBC29A10.09c|SPBC3D6.10|SPCP31B10.05|SPAC2F7.06c|SPBC16D10.04c|SPCC18.09c|SPAC22A12.01c
peptidase activity (GO:0008233)	0.586301	0.760245	0.0875697	-0.246821	-0.956666	139	SPBC18A7.01|SPAC56E4.06c|SPAC13A11.04c|SPAC3A11.10c|SPCC1840.04|SPBC1921.05|SPAC4A8.04|SPBC1711.12|SPBC215.03c|SPAC12G12.11c|SPCC1919.12c|SPCC1322.05c|SPACUNK4.08|SPAC1687.02|SPBC1685.05|SPBC16G5.09|SPAC1F3.10c|SPBC1703.12|SPBC1604.15|SPBC354.09c|SPAC19B12.08|SPAC1952.12c|SPAC1296.03c|SPAC6G9.08|SPCC757.05c|SPBC6B1.06c|SPCC126.04c|SPAC19B12.10|SPBC1289.17|SPAC24C9.08
transcription elongation regulator activity (GO:0003711)	0.587196	0.760245	0.0758887	-0.390111	-0.886448	11	SPAC23C4.19|SPBC1861.07|SPAC6G9.15c
cell adhesion mediator activity (GO:0098631)	0.558036	0.752572	0.0791317	-0.38029	-0.912525	14	SPBC21D10.06c|SPBC1289.15|SPAPB15E9.01c|SPAP11E10.02c
mitochondrion organization (GO:0007005)	0.565598	0.752572	0.0931455	-0.241937	-0.966418	169	SPBC713.06|SPBP18G5.02|SPAC823.16c|SPBC1706.03|SPAC25A8.02|SPBC6B1.05c|SPAC688.10|SPAC7D4.04|SPBC685.02|SPBC11C11.11c|SPCC320.04c|SPAC4F10.07c|SPBC15D4.07c|SPCC24B10.10c|SPBC27B12.01c|SPBC1711.11|SPAC1783.06c|SPBP23A10.03c|SPBC12D12.09|SPCC63.03|SPAC1F3.10c|SPCC645.02|SPBC216.02|SPBC1347.01c|SPBC25B2.07c|SPCC16A11.08|SPBC28F2.06c|SPAC10F6.11c|SPAC22A12.08c|SPCC1442.15c
signaling receptor activity (GO:0038023)	0.517621	0.706246	0.0824344	-0.470564	-0.962709	8	SPAC3F10.10c|SPBC12C2.09c|SPCC1753.02c
detoxification (GO:0098754)	0.461333	0.634826	0.0999277	-0.265432	-1.0022	108	SPAC56E4.06c|SPCC830.10|SPAC25B8.09|SPAC806.04c|SPCC965.09|SPBC947.06c|SPBC31F10.03|SPCC1281.07c|SPAC25B8.10|SPAC1786.01c|SPCC757.05c|SPBC12C2.12c|SPAC6G9.05|SPAC5H10.02c|SPBP4H10.17c|SPBC1289.16c
prospore membrane (GO:0005628)	0.45815	0.634826	0.0891647	-0.320363	-0.983606	33	SPAC24C9.07c|SPAC23C4.10|SPAPJ696.01c|SPBC23G7.16|SPBC26H8.02c|SPBC14C8.05c|SPAC19A8.05c|SPAC17G8.10c|SPAC1296.04|SPAC29A4.05|SPBC1347.03|SPBC16D10.05|SPAC977.10
transcription coregulator activity (GO:0003712)	0.422872	0.6025	0.105125	-0.292096	-1.01863	71	SPBC800.02|SPAC589.02c|SPAC13G7.10|SPAC22H10.11c|SPCC61.02|SPCC622.16c|SPAC1002.04c|SPAC4D7.10c|SPAC29B12.11c|SPBC14C8.17c|SPBC1734.16c|SPBC12C2.10c|SPBC146.01|SPCC126.04c|SPBC25H2.11c|SPAC29A4.07|SPAC23H4.17c|SPAC23C11.15|SPAC26H5.05
cell adhesion (GO:0007155)	0.412946	0.598958	0.0959207	-0.426598	-1.02364	14	SPBC21D10.06c|SPBC1289.15|SPAPB15E9.01c|SPBC15D4.02
transferase activity, transferring nitrogenous groups (GO:0016769)	0.387665	0.567401	0.0988903	-0.369013	-1.03264	23	SPCC569.07|SPAC27F1.05c|SPCC417.11c|SPAC19D5.07|SPAC10F6.13c|SPCC777.09c|SPAC56E4.03|SPBC428.02c|SPBC725.01
intramembrane lipid transporter activity (GO:0140303)	0.335541	0.495615	0.107972	-0.520939	-1.10819	9	SPBC15D4.07c|SPAC4F10.16c
lipid metabolic process (GO:0006629)	0.311526	0.473168	0.137251	-0.248305	-1.03128	232	SPAC24H6.01c|SPBC887.15c|SPBP18G5.02|SPAC3H8.06|SPBC409.18|SPCC5E4.05c|SPCC1827.02c|SPBC21B10.11|SPAC4G8.12c|SPAC22F8.11|SPAC5D6.06c|SPCC1020.13c|SPAC23C4.16c|SPBC776.05|SPAC16E8.02|SPBC19C2.09|SPBC16A3.12c|SPBC3D6.07|SPBC18H10.02|SPAC4A8.10|SPAC19A8.03|SPAC56E4.02c|SPBC3B9.15c|SPBC31F10.02|SPAC1952.13|SPCC645.02|SPAC31G5.15|SPBC1604.15|SPAC343.19|SPAC9G1.10c|SPBC685.05|SPBC32F12.01c|SPAC4D7.02c|…
guanyl-nucleotide exchange factor activity (GO:0005085)	0.296804	0.455099	0.118288	-0.334863	-1.0871	43	SPAC16E8.09|SPAC23D3.13c|SPBC3E7.04c|SPAC26F1.01|SPBC3H7.06c|SPAC23C4.10|SPAC6G9.04|SPBC1778.05c|SPBC23E6.08|SPAC1006.06|SPAC31A2.16
hydrolase activity, acting on carbon-nitrogen (but not peptide) bonds (GO:0016810)	0.276042	0.427334	0.132846	-0.321852	-1.10478	62	SPAC1952.11c|SPCC1672.03c|SPCC553.02|SPBC1683.02|SPAC11D3.09|SPBP26C9.02c|SPCC965.09|SPCC4G3.16|SPAC222.08c|SPAC1F8.04c|SPAC13C5.04|SPAC19G12.03|SPAC1002.19|SPAPB2B4.01c|SPCC285.04|SPBC16A3.06|SPBC215.08c|SPAPB24D3.03|SPBC800.03|SPAC11D3.15|SPBC418.01c|SPBC1709.14
extracellular region (GO:0005576)	0.261438	0.412662	0.123842	-0.390618	-1.12329	25	SPAC4A8.04|SPBC2D10.05|SPAC1296.03c|SPAC22H12.05c
small molecule sensor activity (GO:0140299)	0.246187	0.392437	0.128143	-0.619478	-1.2224	7	SPAC27E2.09|SPBC14F5.13c|SPCC74.06|SPAC1834.08
cell surface (GO:0009986)	0.234211	0.377079	0.146416	-0.317024	-1.10699	72	SPAC9G1.06c|SPBC1198.06c|SPAC27E2.01|SPBC2D10.05|SPAC23D3.14c|SPBP19A11.02c|SPBC21D10.06c|SPBC146.10|SPBC14C8.05c|SPCC11E10.09c
cell wall organization or biogenesis (GO:0071554)	0.218085	0.358283	0.153159	-0.296237	-1.11216	102	SPBC1198.06c|SPAC1F7.03|SPCC777.07|SPAC3G6.09c|SPAC24C9.07c|SPAC27E2.01|SPBC2D10.05|SPAC23D3.14c|SPAC16A10.04|SPAC8F11.10c|SPCC306.06c|SPAC1F3.02c|SPBC12D12.04c|SPAC1006.06|SPAC23H3.11c|SPAC27E2.07|SPAC19G12.03|SPAC1527.01|SPAC959.04c|SPBC1734.04|SPCC63.04|SPAC1296.04|SPCC63.02c|SPAC19B12.02c|SPBC16D10.05|SPCP1E11.04c|SPBC1709.01|SPAC22A12.07c|SPAC3C7.05c|SPAC23D3.10c
ATPase activity (GO:0016887)	0.148036	0.250882	0.202072	-0.270651	-1.11756	214	SPAC15A10.03c|SPAC1D4.12|SPAC3A11.14c|SPCC550.03c|SPBC23E6.02|SPCC188.03|SPCC126.02c|SPAC1250.01|SPCC1739.03|SPBC11C11.11c|SPAC15A10.01|SPBP4H10.06c|SPBP22H7.05c|SPCC1620.14c|SPCC24B10.10c|SPCC330.01c|SPBC902.02c|SPAC144.05|SPBC146.03c|SPAC17A5.06|SPAC1834.07|SPAC2G11.12|SPCC306.03c|SPAC25G10.07c|SPBC336.01|SPBC776.13|SPBC16D10.04c|SPCC5E4.06|SPAC3C7.03c|SPCC830.03|SPCC1919.10c|SPBC211.04c|SPBC16…
chromatin organization (GO:0006325)	0.13871	0.237577	0.216543	-0.264025	-1.10651	248	SPCC1393.05|SPBC2D10.17|SPAC13A11.04c|SPCC1393.02c|SPAC1250.01|SPBC29A10.09c|SPBC1604.17c|SPCC1739.03|SPCC1795.08c|SPBP22H7.05c|SPCC1620.14c|SPBC8D2.04|SPBC83.03c|SPBC1685.08|SPCC188.13c|SPBC428.08c|SPCC16A11.14|SPAC6F12.09|SPAC6F6.09|SPAC328.02|SPCC663.12|SPAPB1E7.02c|SPBC354.03|SPCC594.05c|SPCC61.02|SPBC8D2.03c|SPCC23B6.03c|SPAC2F7.08c|SPAPB1E7.14|SPBP8B7.28c|SPAC458.03|SPCC622.16c|SPCC613.12c|…
topological DNA entrapment activity (GO:0061776)	0.122056	0.213597	0.186433	-0.708456	-1.35868	6	SPBP4H10.06c|SPBC146.03c|SPAC10F6.09c|SPBC29A10.04|SPAC17H9.20
actin cortical patch (GO:0030479)	0.118987	0.210516	0.206588	-0.362968	-1.21085	55	SPBC17F3.02|SPCC162.07|SPAC16E8.01|SPBC557.04|SPBC4C3.06|SPAC25G10.09c|SPBC6B1.02|SPBC31F10.07|SPAC23C4.02|SPAC9G1.10c|SPCC1919.10c|SPBC12C2.05c|SPAC23A1.17|SPBC800.10c|SPCC794.11c|SPBC1778.08c
metal ion homeostasis (GO:0055065)	0.11811	0.210516	0.2114	-0.343453	-1.19173	69	SPAC105.01c|SPAC4G8.13c|SPAC1F7.03|SPAC15A10.01|SPBC29A3.01|SPCC126.09|SPCC1393.10|SPAC1F3.10c|SPBC23G7.16|SPAC227.13c|SPAC1142.05|SPBC1683.10c|SPBC725.11c|SPAC29A4.19c|SPAC1639.02c|SPBC27B12.12c|SPBC18H10.16|SPAC521.04c|SPAC977.10|SPBC12C2.09c|SPAC17D4.03c|SPCC1672.11c|SPCC1183.03c|SPAC31A2.11c|SPAC2E1P3.04
phosphoprotein phosphatase activity (GO:0004721)	0.0855856	0.160224	0.231127	-0.410937	-1.2851	37	SPCC1020.05|SPBC1685.01|SPAC23A1.16c|SPAC57A7.08|SPAC1782.09c|SPAC22H10.04|SPAC3G9.04|SPBC17A3.06|SPBC3F6.01c|SPAC4A8.03c|SPAC10F6.17c|SPCC4F11.02
enzyme regulator activity (GO:0030234)	0.0809969	0.154748	0.282013	-0.280013	-1.16531	235	SPAC1F3.03|SPAC16E8.09|SPAC23D3.13c|SPAC328.08c|SPAC18B11.11|SPAC7D4.04|SPCC364.05|SPAC15A10.16|SPCC584.03c|SPBC3E7.04c|SPAC26F1.01|SPAC4F8.13c|SPCC1442.02|SPBC3H7.06c|SPAC23C4.10|SPBC21B10.11|SPBC26H8.04c|SPAC4G8.04|SPAC6G9.04|SPBC543.04|SPAC26F1.09|SPAC26A3.10|SPAC19E9.03|SPCC306.03c|SPBC428.13c|SPCC1620.12c|SPBC649.05|SPAC222.10c|SPBC14C8.09c|SPAC26A3.09c|SPBC1778.05c|SPAC630.05|SPAC15E1.10|SP…
hydrolase activity, acting on ester bonds (GO:0016788)	0.0816993	0.154748	0.287857	-0.274892	-1.1512	256	SPCC1020.05|SPBC1685.01|SPAC589.11|SPBC409.18|SPAC23C11.04c|SPCC970.01|SPCC5E4.05c|SPAPB1E7.06c|SPBC685.02|SPAC23A1.16c|SPAC3G6.09c|SPBC29A10.09c|SPAC57A7.08|SPCC1672.06c|SPAC14C4.10c|SPBC30D10.03c|SPAC1782.09c|SPAC22F8.11|SPCC1020.13c|SPAC23C4.16c|SPCC188.13c|SPBC16A3.12c|SPBC3D6.10|SPCP31B10.05|SPAC4A8.10|SPBC21H7.03c|SPAC2F7.06c|SPAC19A8.03|SPBC31F10.02|SPBC14F5.13c|SPAC1952.13|SPAC22H10.04|SP…
nucleoside-triphosphate diphosphatase activity (GO:0047429)	0.0684327	0.134362	0.257206	-0.81253	-1.44967	5	SPCC830.10|SPBC725.05c|SPCC11E10.05c
general transcription initiation factor activity (GO:0140223)	0.0353447	0.0746737	0.321776	-0.405414	-1.36545	57	SPBC13E7.10c|SPAC1D4.12|SPAC13A11.04c|SPAC29E6.08|SPBC32F12.15|SPCC1919.14c|SPBC1861.07|SPBC336.07|SPAC17A5.06|SPAC1002.04c|SPBC3B8.11|SPAC3A12.05c|SPAC23G3.09|SPAC16E8.16|SPBC1826.01c
ascospore formation (GO:0030437)	0.0347045	0.0744991	0.321776	-0.427036	-1.40662	49	SPAC24C9.15c|SPBC29A10.02|SPAC24C9.07c|SPCC970.09|SPAC6G9.04|SPAPJ696.01c|SPBC19F8.01c|SPBC26H8.02c|SPAC19A8.05c|SPAC821.06|SPAC19G12.03|SPBC660.07|SPCC63.04|SPAC1296.04|SPAC29A4.05|SPCC63.02c|SPBC1347.03|SPBC16D10.05
mitotic cytokinesis (GO:0000281)	0.029809	0.0657431	0.352488	-0.418438	-1.40055	56	SPAC9G1.06c|SPAC1F5.04c|SPAC4F8.13c|SPAC1782.09c|SPCC4B3.15|SPCC1739.11c|SPAC4F10.11|SPAC12B10.10|SPBC27.04|SPCC1919.10c|SPBC2D10.14c|SPAC6G10.05c|SPBC1685.15c|SPAC31A2.16|SPCC645.05c|SPAC821.06|SPBC11B10.05c|SPBC725.09c|SPBC902.06|SPAC4A8.05c|SPAC15A10.08|SPAC4F10.15c|SPBC1709.01|SPAC24H6.09
microtubule cytoskeleton organization (GO:0000226)	0.0276536	0.0618364	0.352488	-0.387127	-1.35003	71	SPAC3A11.14c|SPAC3G9.12|SPBC29A10.02|SPBC32H8.09|SPAC1782.09c|SPAC22H10.10|SPAC6G9.04|SPCC417.07c|SPAC6G9.06c|SPAC25G10.07c|SPBC216.02|SPAC458.04c|SPAC3C7.12|SPBC1685.15c|SPCC320.13c|SPCC11E10.03|SPAC1782.05|SPAC4H3.11c|SPBC2F12.13|SPBC11B10.05c|SPBC365.15|SPBC11C11.04c|SPBC902.06|SPBC1347.03|SPBC8D2.05c
establishment or maintenance of cell polarity (GO:0007163)	0.0219663	0.049811	0.352488	-0.390056	-1.34799	68	SPBC17F3.02|SPAC1F3.03|SPAC16E8.09|SPAC1F5.04c|SPAC15A10.16|SPCC417.07c|SPAC16A10.04|SPAC1834.07|SPAC24B11.11c|SPCC1919.10c|SPBC1604.20c|SPAC3C7.12|SPBC1778.08c|SPAC20H4.11c|SPBC21D10.12|SPAC6G10.02c|SPBC11B10.05c|SPBC365.15|SPCC1223.06
lipoprotein biosynthetic process (GO:0042158)	0.0182054	0.0424793	0.352488	-0.448655	-1.46779	48	SPAC24H6.01c|SPAC823.16c|SPBC6B1.05c|SPAC3F10.07c|SPBC21B10.11|SPAC4G8.12c|SPAC1783.06c|SPBC3D6.07|SPBC1604.15|SPBC685.05|SPCC1450.15|SPAC589.07c|SPAC31G5.16c|SPAC22A12.13|SPAC1002.11|SPBC405.05|SPAPB2B4.01c
nitrogen cycle metabolic process (GO:0071941)	0.0161928	0.0383388	0.352488	-0.611661	-1.54529	17	SPAC1952.11c|SPBP26C9.02c|SPBC428.05c|SPBC1289.16c|SPCPB16A4.05c|SPBC56F2.09c|SPAC4G9.10|SPBC215.08c
mitotic spindle (GO:0072686)	0.0153308	0.0373978	0.38073	-0.383374	-1.42379	96	SPBC336.15|SPAC15A10.03c|SPAC3A11.14c|SPAC16E8.09|SPAC139.03|SPCC1393.02c|SPAC3G9.12|SPAC1039.05c|SPBC32H8.09|SPAC23C11.16|SPCC1620.14c|SPAC323.03c|SPAC1782.09c|SPAC6G9.04|SPAC15A10.15|SPCC962.02c|SPAC23C4.18c|SPAC25G10.07c|SPAC14C4.02c|SPBC1347.01c|SPBC725.12|SPAC3C7.12|SPBC1685.15c|SPAC3H1.12c|SPCC320.13c
division septum (GO:0000935)	0.0110307	0.0281896	0.38073	-0.48691	-1.53462	38	SPAC9G1.06c|SPAC16E8.09|SPAC16A10.04|SPAC17G8.12|SPBC27.04|SPAC1F3.02c|SPBC12D12.04c|SPAC1006.06|SPAC6G10.02c|SPAC1952.16|SPAC2C4.14c|SPCC1223.06|SPCC306.09c|SPBC1709.01|SPAC24H6.09|SPAC1F7.04
contractile ring (GO:0070938)	0.00802577	0.0211828	0.38073	-0.468201	-1.54683	51	SPBC17F3.02|SPAC9G1.06c|SPAC1F5.04c|SPAC4F8.13c|SPAC1782.09c|SPCC970.09|SPCC4B3.15|SPAC24B11.11c|SPAC4F10.11|SPAC23C4.02|SPAC12B10.10|SPAC26A3.09c|SPBC2D10.14c|SPAC31A2.16|SPBC1778.08c|SPCC645.05c|SPBC21D10.12|SPAC821.06
hydrolase activity, acting on glycosyl bonds (GO:0016798)	0.00382129	0.0104276	0.431708	-0.471916	-1.61019	60	SPAC513.05|SPBC1198.06c|SPBC1861.05|SPAC27E2.01|SPAPB24D3.04c|SPBC2D10.05|SPAC23D3.14c|SPBC1683.06c|SPBC23G7.11|SPAC17G8.02|SPAC23A1.04c|SPBC14C8.05c|SPCC11E10.09c|SPAC23H3.11c|SPAC1527.01|SPBC660.07|SPAC1002.03c|SPCC63.02c|SPAC26A3.02|SPBC16D10.05|SPAC3C7.05c|SPAC23D3.10c|SPBC1683.07
microtubule binding (GO:0008017)	0.00371404	0.0103097	0.431708	-0.586573	-1.76179	31	SPAC3A11.14c|SPAC3G9.12|SPBC336.08|SPBC11C11.03|SPCC1020.02|SPAC1834.07|SPAC25G10.07c|SPBC1604.20c|SPBC25B2.07c|SPAC3C7.12|SPBC1685.15c|SPAC144.14|SPAC4H3.11c|SPBC2F12.13
Golgi apparatus (GO:0005794)	0.00321891	0.00909202	0.431708	-0.297765	-1.28839	367	SPBC18A7.01|SPAC3H8.06|SPAC823.16c|SPAC14C4.04|SPAC3A11.10c|SPCC569.06|SPAC25B8.08|SPAC4G9.07|SPAC23D3.13c|SPAC23H3.04|SPBP4H10.07|SPAC6F12.03c|SPAC22E12.06c|SPAC1F7.03|SPCC777.07|SPBC16C6.06|SPAC14C4.07|SPAC4A8.04|SPAC14C4.10c|SPAC20H4.02|SPBC29A3.01|SPBC577.11|SPBC15D4.07c|SPCC364.04c|SPCC663.18|SPAC17G6.08|SPAC23C4.16c|SPBC776.05|SPBC887.17|SPCC1235.08c|SPAC4D7.11|SPBC887.06c|SPBC3B9.09|SPAC14…
actin cytoskeleton organization (GO:0030036)	0.00241702	0.00694893	0.431708	-0.429995	-1.57697	88	SPBC17F3.02|SPAC9G1.06c|SPAC1F5.04c|SPCC162.07|SPAC16E8.01|SPBC557.04|SPAC4F8.13c|SPAC1782.09c|SPCC4B3.15|SPBC4C3.06|SPAC25G10.09c|SPBC6B1.02|SPAC16A10.04|SPBC31F10.07|SPAC23C4.02|SPAC12B10.10|SPCC1919.10c|SPBC12C2.05c|SPAC23A1.17|SPBC800.10c|SPBC2D10.14c|SPCC794.11c|SPBC1685.15c|SPAC31A2.16|SPBC1778.08c|SPAC20H4.11c
motor activity (GO:0003774)	0.00220366	0.0064507	0.431708	-0.688282	-1.73886	17	SPAC3A11.14c|SPAC1834.07|SPAC25G10.07c|SPCC1919.10c|SPBC1604.20c|SPBC2D10.14c|SPBC1685.15c|SPCC645.05c|SPAC144.14|SPBC2F12.13|SPBC12C2.08|SPAC4A8.05c|SPAC1093.06c
ubiquitin-like protein transferase activity (GO:0019787)	0.00189473	0.00575568	0.45506	-0.423269	-1.54757	91	SPAC1805.15c|SPBC36B7.05c|SPAC11E3.05|SPBC211.07c|SPBC23E6.02|SPBP4H10.07|SPAC16A10.03c|SPBC3D6.11c|SPAC343.03|SPCC330.01c|SPAC15A10.11|SPBP8B7.23|SPAC144.05|SPBC29A3.03c|SPAC328.02|SPCC4G3.12c|SPAC1687.05|SPAC2F3.16|SPBC4.05|SPBC19C7.02|SPAC30D11.13|SPAC19A8.05c
DNA replication (GO:0006260)	0.0016258	0.00503373	0.45506	-0.422515	-1.58757	105	SPBC713.06|SPBC23E6.02|SPAPB1E7.06c|SPAC6F6.16c|SPAC6B12.02c|SPBC902.02c|SPAC3H8.05c|SPAC8F11.07c|SPAPB1E7.02c|SPAC2G11.12|SPAC30D11.10|SPBC336.01|SPBC16D10.04c|SPBC1347.10|SPAC6B12.10c|SPBC16G5.12c|SPBC211.04c|SPAC3H5.06c|SPBC216.06c|SPAP27G11.15|SPBC947.11c|SPAC694.06c|SPAC1556.01c|SPAC26H5.02c|SPAC9.05|SPBC1347.08c|SPAC6B12.11|SPBC17D11.06|SPBC29A10.03c|SPBP23A10.13|SPBC336.04|SPAC26H5.03|SPAC…
plasma membrane (GO:0005886)	0.000775017	0.00254648	0.477271	-0.327964	-1.40161	298	SPAC24H6.01c|SPAC105.01c|SPCC962.01|SPAC2E1P3.02c|SPAC56E4.06c|SPAC1F3.03|SPAC16E8.09|SPAC23H3.04|SPCC162.07|SPBC1198.06c|SPAPYUK71.03c|SPAC1F7.03|SPAC16E8.01|SPCC320.05|SPAC24C9.07c|SPBC691.03c|SPAC1142.07c|SPAC4F10.16c|SPBC530.04|SPAC25G10.09c|SPBC16A3.17c|SPBC887.17|SPAC26F1.09|SPAC23D3.14c|SPBC18H10.02|SPAC16A10.04|SPAC17G8.12|SPBC2G2.06c|SPBC1683.03c|SPBP19A11.02c|SPBC19C7.05|SPCC1393.10|SPB…
catalytic activity, acting on a protein (GO:0140096)	0.000634931	0.00212966	0.477271	-0.302875	-1.34529	513	SPAC1805.15c|SPBC18A7.01|SPCC4G3.08|SPBC36B7.05c|SPCC1020.05|SPBC1685.01|SPAC11E3.05|SPAC56E4.06c|SPBC17F3.02|SPAC13A11.04c|SPBC6B1.05c|SPAC3A11.10c|SPBC211.07c|SPBC36B7.09|SPCC1259.13|SPBC23E6.02|SPBP4H10.07|SPAC3F10.07c|SPCC1840.04|SPAC16A10.03c|SPAC27E2.09|SPAC23A1.16c|SPBC1921.05|SPBC3D6.11c|SPAC343.03|SPAC806.04c|SPAC1006.09|SPBC119.07|SPAC57A7.08|SPBC557.04|SPAC4A8.04|SPAC23C11.16|SPAPB18E9…
organelle localization by membrane tethering (GO:0140056)	0.000444955	0.00155734	0.498493	-0.57843	-1.85516	42	SPCC962.01|SPAC6F12.03c|SPAC16A10.03c|SPAPYUK71.03c|SPAC824.05|SPCC320.04c|SPCC970.09|SPBC27B12.01c|SPAC17G6.08|SPBC3B9.10|SPAC823.05c|SPBC23G7.06c|SPCC1183.01|SPBC28F2.06c|SPAC1834.11c|SPBC31E1.04|SPCC16A11.04|SPBC36B7.07|SPAC2G11.03c
conjugation with cellular fusion (GO:0000747)	0.000427481	0.00152943	0.498493	-0.578612	-1.87841	43	SPAC3A11.14c|SPAC16E8.09|SPBC1718.01|SPAC4A8.04|SPCC70.12c|SPBC2D10.05|SPCC417.07c|SPBC21D10.06c|SPBC21.05c|SPBC651.05c|SPAC3C7.12|SPAC1296.03c|SPAC3F10.10c
protein catabolic process (GO:0030163)	0.000386856	0.00141554	0.498493	-0.351103	-1.47455	255	SPAC1805.15c|SPAC29E6.01|SPAC11H11.01|SPBC36B7.05c|SPAC6F12.14|SPBC28E12.01c|SPAC13A11.04c|SPBC211.07c|SPBC1718.01|SPBP4H10.07|SPCC1840.04|SPBC3D6.11c|SPAC343.03|SPAC3H1.14|SPAC6F12.15c|SPBC106.09|SPBC3H7.06c|SPAC17G6.12|SPBC13G1.12|SPAC1142.07c|SPBC1861.07|SPAC17C9.01c|SPAC15A10.11|SPBC3B9.09|SPAC17G6.05c|SPAC1B3.07c|SPCC1919.12c|SPCC1322.05c|SPBC106.13|SPBC29A3.03c|SPAC328.02|SPAC23C4.12|SPBP23…
protein modification by small protein conjugation or removal (GO:0070647)	0.000321918	0.00120532	0.498493	-0.372097	-1.51899	197	SPAC1805.15c|SPAC29E6.01|SPBC36B7.05c|SPAC6F12.14|SPAC11E3.05|SPAC13A11.04c|SPBC6B1.05c|SPBC211.07c|SPBC23E6.02|SPBP4H10.07|SPAC16A10.03c|SPAPB1A10.14|SPBC3D6.11c|SPAC343.03|SPAC6F12.15c|SPBC106.09|SPBC3H7.06c|SPCC330.01c|SPBC215.03c|SPAC17C9.01c|SPAC12G12.11c|SPBC1685.08|SPAC15A10.11|SPBP8B7.23|SPAC144.05|SPBC29A3.03c|SPAC328.02|SPBC1E8.02|SPAC1565.07c|SPBC336.01|SPBC1703.12|SPCC4G3.12c|SPCC1827…
actin cytoskeleton (GO:0015629)	0.000229178	0.000899941	0.518848	-0.435133	-1.65738	114	SPBC17F3.02|SPAC9G1.06c|SPAC1F5.04c|SPCC162.07|SPAC15A10.16|SPAC16E8.01|SPBC557.04|SPAC4F8.13c|SPAC1782.09c|SPCC970.09|SPCC4B3.15|SPBC4C3.06|SPBC1347.12|SPAC25G10.09c|SPBC2D10.05|SPBC6B1.02|SPBC31F10.07|SPAC24B11.11c|SPAC4F10.11|SPAC23C4.02|SPAC12B10.10|SPAC9G1.10c|SPAC26A3.09c|SPCC1919.10c|SPBC12C2.05c|SPAC23A1.17|SPBC800.10c|SPBC2D10.14c|SPCC794.11c|SPAC31A2.16|SPBC1778.08c|SPCC11E10.03|SPCC645…
telomere organization (GO:0032200)	0.00022155	0.000891741	0.518848	-0.54997	-1.83468	55	SPBC19C7.10|SPCC1393.14|SPBC6B1.09c|SPBC19G7.13|SPCC126.02c|SPAC6F6.16c|SPCC188.07|SPBC409.12c|SPAC30D11.10|SPCC23B6.03c|SPBC16D10.04c|SPBP8B7.28c|SPAC458.03|SPBC1778.02|SPCC613.12c|SPAC22A12.01c|SPAC6F6.17|SPBC947.11c|SPAC1556.01c
mitotic sister chromatid segregation (GO:0000070)	0.000161099	0.000665051	0.518848	-0.458519	-1.73124	108	SPBC336.15|SPAC3A11.14c|SPAC11H11.05c|SPCC188.03|SPBC336.08|SPAC1250.01|SPBC11C11.03|SPCC1020.02|SPAC25B8.14|SPBC32H8.09|SPBP4H10.06c|SPAC1782.09c|SPAC17C9.01c|SPAC15A10.15|SPCC962.02c|SPCC417.07c|SPBC146.03c|SPCC306.03c|SPAC6G9.06c|SPAC25G10.07c|SPAC29E6.04|SPBC776.13|SPBC725.12|SPAC26A3.03c|SPAC31A2.05c|SPBC2G2.14|SPAC1687.20c|SPBC1685.15c|SPBC409.09c|SPCC320.13c|SPCC970.12
vesicle-mediated transport (GO:0016192)	0.000130016	0.000550859	0.518848	-0.346521	-1.49264	325	SPAC11H11.01|SPAC1F3.03|SPAC23D3.13c|SPAC2G11.05c|SPAC6F12.03c|SPCC162.07|SPCC364.05|SPAC16A10.03c|SPAC824.05|SPAC16E8.01|SPBC119.07|SPAC26F1.01|SPBC839.02|SPBC16C6.06|SPBC691.03c|SPAC23C4.10|SPCC1235.10c|SPBC13G1.12|SPAC1142.07c|SPCC970.09|SPBC1604.18c|SPBC4C3.06|SPCC364.04c|SPCC663.18|SPCC162.06c|SPAC17G6.08|SPAC25G10.09c|SPAC4G8.04|SPAC3H5.08c|SPCC1235.08c|SPAPJ696.01c|SPBC887.06c|SPBC3B9.09|S…
meiotic drive (GO:0110134)	5.63518e-05	0.000252018	0.557332	-0.7835	-1.97942	17	SPCC663.02|SPCC1739.15|SPCC736.05|SPCC663.17|SPCC1620.02|SPCC1906.04|SPCC1281.08|SPCC970.11c|SPCC622.21|SPCC1450.08c|SPCC1183.10|SPCC1919.06c|SPCC1906.03|SPCC794.02
phagophore assembly site (GO:0000407)	4.11973e-05	0.000189508	0.557332	-0.693374	-2.0629	29	SPAC823.16c|SPAC25A8.02|SPBC6B1.05c|SPAC6B12.08|SPAC7D4.04|SPAC4F10.07c|SPBC15D4.07c|SPBC1711.11|SPAC1783.06c|SPCC1682.11c|SPCC16A11.08|SPAC10F6.11c|SPBC31E1.01c|SPAC589.07c|SPCC63.08c
autophagy (GO:0006914)	1.41459e-05	6.90146e-05	0.593325	-0.565654	-1.94164	62	SPAC823.16c|SPAC25A8.02|SPBC6B1.05c|SPAC6B12.08|SPAC7D4.04|SPCC364.05|SPBC119.07|SPAC4A8.04|SPAC4F10.07c|SPBC15D4.07c|SPAC23C4.16c|SPBC1711.11|SPAC1783.06c|SPCC1682.11c|SPAC19B12.08|SPCC16A11.08|SPAC10F6.11c|SPBC1718.05|SPBC31E1.01c|SPAC589.07c|SPCC63.08c|SPAC22H12.05c
cell cortex (GO:0005938)	1.04573e-05	5.26133e-05	0.593325	-0.407292	-1.67913	223	SPAC1805.15c|SPAC24C9.15c|SPCC962.01|SPBC17F3.02|SPAC9G1.06c|SPAC16E8.09|SPAC1F5.04c|SPCC162.07|SPAC15A10.16|SPAC16E8.01|SPBC557.04|SPAC4F8.13c|SPBC691.03c|SPAC23C4.10|SPCC1235.10c|SPAC1782.09c|SPCC970.09|SPCC4B3.15|SPBC4C3.06|SPBC1347.12|SPBC530.04|SPAC25G10.09c|SPBC19F8.01c|SPBC6B1.02|SPAC16A10.04|SPAC1834.07|SPBC31F10.07|SPAC24B11.11c|SPAC17G8.12|SPBC646.17c|SPBC2G2.06c|SPBC428.13c|SPCC622.10c…
kinase activity (GO:0016301)	8.21816e-06	4.26814e-05	0.593325	-0.420619	-1.71473	192	SPCC4G3.08|SPBC17F3.02|SPAC23C11.04c|SPBC36B7.09|SPCC1259.13|SPAC27E2.09|SPAC1006.09|SPBC119.07|SPBC1861.05|SPBC557.04|SPCC1672.06c|SPAC23C11.16|SPAPB18E9.02c|SPAC222.13c|SPBC21.06c|SPAC1834.09|SPAC23C4.12|SPBC6B1.02|SPBP35G2.05c|SPBC16G5.02c|SPAC24B11.11c|SPCC18B5.11c|SPCC23B6.03c|SPAC9G1.09|SPAC343.19|SPCC70.05c|SPCC74.06|SPAC23H4.02|SPCC830.03|SPCC970.08|SPAC1F3.02c|SPAC1D4.11c|SPBC12D12.04c|S…
cytoplasmic vesicle (GO:0031410)	5.51483e-06	2.95962e-05	0.610527	-0.415443	-1.70847	207	SPAC11H11.01|SPBC36B7.05c|SPAC23D3.13c|SPBP4H10.07|SPAC6F12.03c|SPCC162.07|SPCC364.05|SPBC1921.05|SPAC824.05|SPAC1F7.03|SPAC16E8.01|SPAC3H1.14|SPBC119.07|SPBC16C6.06|SPBC691.03c|SPAC4A8.04|SPAC23C4.10|SPBC13G1.12|SPAC1142.07c|SPBC1604.18c|SPBC4C3.06|SPCC162.06c|SPAC17G6.08|SPAC23C4.16c|SPAC25G10.09c|SPCC1235.08c|SPAPJ696.01c|SPBC887.06c|SPBC3B9.09|SPAC26F1.09|SPAC144.06|SPAC17G6.05c|SPAC1B3.07c|S…
regulation of transcription, DNA-templated (GO:0006355)	3.16066e-06	1.75471e-05	0.627257	-0.364221	-1.57132	355	SPCC1393.05|SPBC2D10.17|SPAC32A11.03c|SPAC13A11.04c|SPBC800.02|SPAC4G8.13c|SPAC139.03|SPCC1259.13|SPBC530.05|SPCC1393.02c|SPBC1683.13c|SPAC1039.05c|SPAC23A1.16c|SPAC1250.01|SPCC757.04|SPAC11D3.17|SPBC29A10.09c|SPCC1739.03|SPAC23C4.19|SPAC589.02c|SPBC342.05|SPAC13G7.10|SPAC1399.05c|SPAC23C11.16|SPBC32F12.15|SPBP22H7.05c|SPCC1620.14c|SPBC83.03c|SPAC22H10.11c|SPAC25B8.11|SPBC4C3.12|SPCC777.02|SPBC16…
kinetochore (GO:0000776)	1.64417e-06	1.01812e-05	0.643552	-0.583705	-2.02537	69	SPBC336.15|SPAC3A11.14c|SPAC11H11.05c|SPAC3G9.12|SPBC336.08|SPBC11C11.03|SPCC1020.02|SPAC25B8.14|SPBP4H10.06c|SPAC23C11.16|SPAC1782.09c|SPAC15A10.15|SPCC962.02c|SPAC25G10.07c|SPAC29E6.04|SPBC776.13|SPBC725.12|SPAC1687.20c|SPBC1685.15c|SPBC409.09c|SPCC320.13c|SPCC970.12|SPAC15E1.07c|SPBC106.01|SPAC8C9.17c|SPAPB17E12.06|SPCC1223.15c|SPBC2F12.13|SPBC3D6.04c
protein kinase activity (GO:0004672)	8.12373e-07	5.23168e-06	0.659444	-0.508529	-1.93747	118	SPCC4G3.08|SPBC17F3.02|SPBC36B7.09|SPCC1259.13|SPAC27E2.09|SPAC1006.09|SPBC119.07|SPBC557.04|SPAC23C11.16|SPAPB18E9.02c|SPBC21.06c|SPAC1834.09|SPAC23C4.12|SPBC6B1.02|SPBP35G2.05c|SPAC24B11.11c|SPCC18B5.11c|SPCC23B6.03c|SPAC9G1.09|SPCC70.05c|SPCC74.06|SPAC23H4.02|SPAC1F3.02c|SPAC1D4.11c|SPBC12D12.04c|SPAC644.11c|SPAC9G1.02|SPCC320.13c|SPAC1805.01c|SPAC19E9.02|SPCC63.08c|SPBC106.01|SPBC725.02|SPAC5…
DNA recombination (GO:0006310)	1.27022e-07	8.52108e-07	0.690132	-0.527057	-2.01556	123	SPAC15A10.03c|SPCC1183.05c|SPBC6B1.09c|SPBC23E6.02|SPCC970.01|SPAPB1E7.06c|SPCC24B10.14c|SPAC1142.03c|SPBC3D6.11c|SPCC1442.04c|SPBC119.14|SPAC17A5.11|SPAC6B12.02c|SPAC3H8.05c|SPAC8F11.07c|SPAC2G11.12|SPAC30D11.10|SPBC336.01|SPAC14C4.02c|SPCC5E4.06|SPAC3C7.03c|SPAC1687.05|SPBC23G7.11|SPBC16G5.12c|SPBC211.04c|SPAC3H5.06c|SPBC216.06c|SPAC26A3.03c|SPAC13A11.03|SPAC222.15|SPAP27G11.15|SPBC947.11c|SPAC…
spindle pole body (GO:0005816)	5.23377e-08	3.83017e-07	0.719513	-0.48577	-1.93042	160	SPBC887.09c|SPAC6F12.14|SPBC17F3.02|SPAC3A11.14c|SPAC2G11.05c|SPCC970.01|SPAC11D3.16c|SPAC3G9.12|SPBC32H8.09|SPAC4F8.13c|SPAC23C11.16|SPAC23C4.10|SPAC323.03c|SPAC1782.09c|SPCC330.02|SPBC21.06c|SPCC1739.11c|SPAC6G9.04|SPAC3H5.08c|SPCC417.07c|SPAC23C4.12|SPBC31F10.07|SPAC23C4.18c|SPAC24B11.11c|SPAC6G9.06c|SPAC25G10.07c|SPBC646.17c|SPBC2G2.06c|SPAC9G1.09|SPAC22H10.04|SPBC428.13c|SPAC14C4.02c|SPAC19G…
microtubule cytoskeleton (GO:0015630)	4.71314e-08	3.61341e-07	0.719513	-0.430708	-1.80971	253	SPBC336.15|SPAC15A10.03c|SPBC887.09c|SPAC6F12.14|SPAC24C9.15c|SPBC17F3.02|SPAC3A11.14c|SPAC16E8.09|SPAC2G11.05c|SPAC139.03|SPCC970.01|SPCC1393.02c|SPAC11D3.16c|SPAC3G9.12|SPAC1039.05c|SPBC32H8.09|SPAC22F3.05c|SPAC4F8.13c|SPAC23C11.16|SPAC23C4.10|SPCC1620.14c|SPAC323.03c|SPAC1782.09c|SPCC970.09|SPCC330.02|SPBC1347.12|SPBC21.06c|SPCC1739.11c|SPAC6G9.04|SPAC3H5.08c|SPAC15A10.15|SPCC962.02c|SPCC417.0…
meiotic nuclear division (GO:0140013)	5.74352e-09	5.13726e-08	0.761461	-0.528997	-2.05037	139	SPBC19C7.10|SPAC15A10.03c|SPBC6B1.09c|SPCC970.01|SPAPB1E7.06c|SPBC336.08|SPBC29A10.02|SPBC11C11.03|SPCC1442.04c|SPCC1020.02|SPCC1795.08c|SPBC119.14|SPAC17A5.11|SPAC23C11.16|SPBC1347.12|SPCC188.07|SPAC15A10.15|SPCC417.07c|SPBC428.08c|SPAC328.02|SPAC23C4.12|SPAC25G10.07c|SPBC646.17c|SPAC29E6.04|SPBC336.01|SPBC1778.02|SPBC216.02|SPAC3C7.03c|SPAC1687.05|SPCC613.12c|SPBC16G5.12c|SPAC26A3.03c|SPAC458.0…
catalytic activity, acting on DNA (GO:0140097)	3.13725e-09	2.97116e-08	0.774939	-0.557768	-2.12992	122	SPAC15A10.03c|SPCC1183.05c|SPBC713.06|SPAC1D4.12|SPAC688.10|SPBC23E6.02|SPCC970.01|SPAPB1E7.06c|SPBC685.02|SPCC126.02c|SPAC1250.01|SPBC119.14|SPBP4H10.06c|SPCC1620.14c|SPAPB24D3.04c|SPCC330.01c|SPBC902.02c|SPBC3D6.10|SPCP31B10.05|SPBC146.03c|SPAC17A5.06|SPAC2F7.06c|SPAC2G11.12|SPBC12D12.09|SPBC336.01|SPBC16D10.04c|SPCC5E4.06|SPAC3C7.03c|SPBC1347.01c|SPBC23G7.11|SPBC16G5.12c|SPBC211.04c|SPAC3H5.06…
DNA repair (GO:0006281)	1.66383e-09	1.67423e-08	0.788187	-0.491337	-1.99889	191	SPAC6G9.16c|SPAC15A10.03c|SPCC1183.05c|SPBC713.06|SPAC1D4.12|SPAC23C11.04c|SPBC6B1.09c|SPAC688.10|SPCC1259.13|SPBC23E6.02|SPCC970.01|SPAPB1E7.06c|SPCC24B10.14c|SPBC685.02|SPCC126.02c|SPCC1795.08c|SPBC119.14|SPAC17A5.11|SPAC6B12.02c|SPBC32F12.15|SPAPB24D3.04c|SPCC330.01c|SPCC330.02|SPAC3H8.05c|SPBC3D6.10|SPCP31B10.05|SPAC6F6.09|SPAC8F11.07c|SPAC144.05|SPAPB1E7.02c|SPAC17A5.06|SPAC2F7.06c|SPAC2G11.…
signaling (GO:0023052)	5.06038e-10	5.81944e-09	0.801216	-0.429252	-1.83526	329	SPCC4G3.08|SPCC1020.05|SPBC887.09c|SPBC17F3.02|SPAC1F3.03|SPAC16E8.09|SPAC4G8.13c|SPBC6B1.09c|SPBC36B7.09|SPCC550.03c|SPCC1259.13|SPAC18B11.11|SPAC27E2.09|SPAC23A1.16c|SPCC162.12|SPAC1006.09|SPCC584.03c|SPBC3E7.04c|SPBC119.07|SPAC26F1.01|SPAC57A7.08|SPCC1020.02|SPAC4F8.13c|SPBC342.05|SPAC23C11.16|SPBC3H7.06c|SPAC20H4.02|SPAPB18E9.02c|SPAC22F8.11|SPBC21.06c|SPCC1739.11c|SPCC962.02c|SPAC4D7.11|SPBC…
DNA-binding transcription factor activity (GO:0003700)	4.31594e-10	5.34513e-09	0.814036	-0.620621	-2.27806	89	SPAC32A11.03c|SPAC4G8.13c|SPAC139.03|SPBC530.05|SPBC1683.13c|SPAC1039.05c|SPCC757.04|SPAC11D3.17|SPAC13G7.10|SPAC1399.05c|SPAC25B8.11|SPBC4C3.12|SPCC777.02|SPCC1494.10|SPBC19C2.09|SPAC1142.08|SPAPB1A11.04c|SPCC965.10|SPAC3F10.12c|SPAC11D3.11c|SPAPB24D3.01|SPAC3G9.14|SPAC11D3.07c|SPAC3C7.04|SPAC16.05c|SPAC25G10.03|SPAC1327.01c|SPAC6F12.02|SPCC417.09c|SPBC1773.16c|SPBC725.11c|SPAC105.03c
lipid binding (GO:0008289)	9.43717e-11	1.26615e-09	0.839089	-0.601109	-2.28604	113	SPBC36B7.05c|SPAC823.16c|SPAC24C9.15c|SPCC962.01|SPAC16E8.09|SPCC162.07|SPCC1827.02c|SPAPYUK71.03c|SPBC20F10.07|SPAC26F1.01|SPCC1450.12|SPAPB8E5.04c|SPAC22F8.11|SPBC27B12.01c|SPCC4B3.15|SPAC17G6.08|SPAC6G9.04|SPBC1711.11|SPAPJ696.01c|SPBC887.06c|SPBC3B9.09|SPAC26A3.10|SPBC19F8.01c|SPAC17G8.12|SPBC3B9.15c|SPAC31G5.15|SPBC23G7.06c|SPBC216.02|SPAC26A3.09c|SPBC12D12.04c|SPBC19C2.10|SPAC3C7.02c|SPBC12…
vacuole (GO:0005773)	1.96638e-12	3.16587e-11	0.898671	-0.521145	-2.1445	212	SPAC823.16c|SPAC25A8.02|SPAC2E1P3.02c|SPCC1739.15|SPAC11E3.05|SPAC14C4.04|SPAC56E4.06c|SPBC409.18|SPAC4G9.07|SPAC7D4.04|SPCC364.05|SPAC513.05|SPBC1921.05|SPAC824.05|SPCC320.05|SPAC57A7.08|SPAC14C4.07|SPAC4A8.04|SPAPB8E5.04c|SPBC26H8.04c|SPBC15D4.07c|SPAC630.04c|SPCC162.06c|SPAC23C4.16c|SPCC126.09|SPBC1711.11|SPBC543.04|SPBC16A3.12c|SPCC1919.12c|SPCC1322.05c|SPAC959.02|SPBC3B9.10|SPBP35G2.05c|SPBC…
endosome (GO:0005768)	1.64011e-12	2.93397e-11	0.91012	-0.606575	-2.32865	129	SPAC11H11.01|SPBC36B7.05c|SPAC23D3.13c|SPBP4H10.07|SPAC6F12.03c|SPCC162.07|SPCC364.05|SPBC1921.05|SPAC824.05|SPAC16E8.01|SPBC119.07|SPBC16C6.06|SPAC4A8.04|SPBC13G1.12|SPAC1142.07c|SPBC1604.18c|SPCC162.06c|SPAC17G6.08|SPAC23C4.16c|SPAC25G10.09c|SPAPJ696.01c|SPBC887.06c|SPBC3B9.09|SPAC144.06|SPAC17G6.05c|SPAC1B3.07c|SPCC285.14|SPCC1322.05c|SPBC3B9.10|SPAC3G6.10c|SPAC823.05c|SPAC4G9.13c|SPAC31G5.15|…
molecular adaptor activity (GO:0060090)	2.2297e-13	4.48726e-12	0.943632	-0.579276	-2.27353	150	SPBC19C7.10|SPAC29E6.01|SPBC887.09c|SPAC24C9.15c|SPCC962.01|SPBC1718.01|SPAC6B12.08|SPAC7D4.04|SPAC6F12.03c|SPAC1250.01|SPAPYUK71.03c|SPAC1006.03c|SPAPB1A10.14|SPAC16E8.01|SPBC11C11.03|SPCC1020.02|SPBC839.02|SPBC691.03c|SPBC3H7.06c|SPBC27B12.01c|SPCC4B3.15|SPBC1347.12|SPCC1739.11c|SPBC530.04|SPCC188.07|SPAC15A10.15|SPAC144.06|SPAC959.02|SPBC19F8.01c|SPBC3B9.10|SPAC23C4.18c|SPAC6G9.06c|SPBC2G2.06c…
chromosome (GO:0005694)	1.37963e-15	3.17316e-14	1.01754	-0.414472	-1.86359	591	SPBC336.15|SPCC1393.14|SPAC6G9.16c|SPAC15A10.03c|SPCC1183.05c|SPBC2D10.17|SPAC32A11.03c|SPAC3A11.14c|SPBC6B1.09c|SPBC19G7.13|SPAC688.10|SPAC11H11.05c|SPAC139.03|SPCC1259.13|SPBC23E6.02|SPCC1393.02c|SPAC3G9.12|SPAPB1E7.06c|SPCC188.03|SPBC336.08|SPAC1039.05c|SPCC126.02c|SPAC1142.03c|SPAC1250.01|SPAC1006.03c|SPAC6F6.16c|SPBC3D6.11c|SPBC11C11.03|SPAC11D3.17|SPAC6F12.15c|SPBC29A10.09c|SPCC1020.02|SPAC…
Table S10. Gene set enrichment analysis result after ranking by transcript repeated-median linear model significance. pathway: GO-slim term; pval: P-value of enrichment; padj: Benjamini-Hochberg adjusted P-value of enrichment; log2err: expected error based on the P-value’s SD; ES: enrichment score; NES: normalised enrichment score; size: number of genes included in analysis for each GO-slim term;…
