# Supplementary material for: Growth-rate-dependent and nutrient-specific gene expression resource allocation in fission yeast
Source: Life Sci Alliance. 2022 Feb 28;5(5):e202101223. doi: 10.26508/lsa.202101223 (PMC8886410; doi:10.26508/lsa.202101223)
Supplement: Supplementary file 11 [file LSA-2021-01223_TableS11.xlsx]

## Sheet: TableS11
pathway	pval	padj	log2err	ES	NES	size	leadingEdge
cytoplasmic translation (GO:0002181)	3.05973e-38	4.80378e-36	1.60888	0.674884	3.59348	179	SPAC890.08|SPCC663.04|SPBC685.07c|SPBC577.02|SPBC21C3.13|SPBC83.02c|SPAC1805.11c|SPBC18H10.14;SPAC664.04c|SPBC4C3.07|SPBC1711.06|SPBC646.09c|SPAC3H5.07|SPCC5E4.07|SPAC806.03c|SPBC1709.05|SPBC800.04c|SPAC31G5.17c|SPAC9G1.03c|SPAC18G6.14c|SPBC19C7.06|SPAC664.05|SPAPJ698.02c|SPCC364.03|SPBC2F12.04|SPAC1250.05|SPAC23A1.08c;SPCC1322.15|SPBC1685.09|SPCC1322.11;SPAC3G9.03|SPCC1223.05c;SPAPB17E12.05|SPCC…
cytosolic ribosome (GO:0022626)	2.01118e-31	1.57877e-29	1.45334	0.744487	3.5699	101	SPAC890.08|SPCC663.04|SPBC685.07c|SPBC577.02|SPBC21C3.13|SPBC83.02c|SPAC1805.11c|SPBC18H10.14;SPAC664.04c|SPBC1711.06|SPAC3H5.07|SPCC5E4.07|SPAC806.03c|SPBC3B9.01|SPBC800.04c|SPAC31G5.17c|SPAC9G1.03c|SPAC18G6.14c|SPAC664.05|SPAPJ698.02c|SPCC364.03|SPBC2F12.04|SPAC1250.05|SPAC23A1.08c;SPCC1322.15|SPBC1685.09|SPCC1322.11;SPAC3G9.03|SPCC1223.05c;SPAPB17E12.05|SPAC1687.06c|SPBP4H10.13;SPAC23C11.02c|S…
structural molecule activity (GO:0005198)	3.68602e-27	1.92902e-25	1.34993	0.637105	3.25028	147	SPAC890.08|SPCC663.04|SPBC685.07c|SPBC577.02|SPBC21C3.13|SPBC83.02c|SPAC1805.11c|SPBC18H10.14;SPAC664.04c|SPBC1711.06|SPAC3H5.07|SPCC5E4.07|SPAC806.03c|SPBC800.04c|SPAC31G5.17c|SPAC9G1.03c|SPAC18G6.14c|SPAC664.05|SPAPJ698.02c|SPCC364.03|SPBC2F12.04|SPAC1250.05|SPAC23A1.08c;SPCC1322.15|SPBC1685.09|SPCC1322.11;SPAC3G9.03|SPCC1223.05c;SPAPB17E12.05|SPAC1687.06c|SPBP4H10.13;SPAC23C11.02c|SPAC1071.08|…
ribosome biogenesis (GO:0042254)	9.59012e-17	3.76412e-15	1.05746	0.492001	2.63559	187	SPBC21C3.13|SPAC1805.11c|SPBC18H10.14;SPAC664.04c|SPAC3H5.07|SPAC806.03c|SPBC1709.05|SPAC31G5.17c|SPAC9G1.03c|SPAC18G6.14c|SPAPJ698.02c|SPBC11G11.03|SPAC1250.05|SPAC23A1.08c;SPCC1322.15|SPCC1919.09|SPBC4F6.14|SPAC4F10.09c|SPCC622.18|SPCC1393.03|SPAC22G7.05|SPAC328.10c|SPCC1494.06c|SPBC16H5.08c|SPBC685.06|SPCC24B10.09|SPBC839.05c|SPCP31B10.08c|SPBC17G9.04c|SPAC926.08c|SPBC646.10c|SPBP22H7.08|SPAPB…
nucleolus (GO:0005730)	1.12787e-09	3.54151e-08	0.788187	0.426193	2.1969	155	SPBC21C3.13|SPAC3H5.07|SPAC6G9.08|SPAC18G6.14c|SPAC13D6.02c|SPBC11G11.03|SPAC23A1.08c;SPCC1322.15|SPCC1919.09|SPBC4F6.14|SPBC1347.02|SPAC4F10.09c|SPBP4H10.13;SPAC23C11.02c|SPBC11G11.05|SPCC622.18|SPCC1393.03|SPBC1604.08c|SPAC22G7.05|SPBC776.11|SPCC1494.06c|SPAC23A1.11|SPAC926.08c|SPBC646.10c|SPAC6F6.07c|SPBC83.17|SPAC11E3.15|SPBC4C3.05c|SPCC737.08|SPCC285.15c;SPAC25G10.06|SPAC8C9.08|SPBC18H10.13;…
translation regulator activity (GO:0045182)	2.7289e-06	5.35547e-05	0.627257	0.55286	2.29796	46	SPBC4C3.07|SPBC646.09c|SPAC13D6.02c|SPCC1919.09|SPBC9B6.04c|SPBC25H2.07|SPAC2F7.05c|SPCC417.08|SPAC4D7.09|SPBC4B4.04|SPAC821.05|SPCP1E11.11|SPCC1450.04|SPAC637.07|SPBC17D11.05|SPAC1751.03|SPCC1795.11|SPCP31B10.07;SPAC513.01c|SPBC776.07|SPAC8C9.15c|SPAC343.14c|SPAC1006.07|SPAC25G10.08|SPCC584.04;REV__SPCC584.04|SPBC839.15c;SPAC23A1.10|SPAC29A4.02c
cytosol (GO:0005829)	1.50121e-05	0.000261878	0.593325	0.225947	1.37015	1095	SPCC4G3.17|SPAC1687.04|SPAC890.08|SPCC663.04|SPBC685.07c|SPBC577.02|SPCC1682.07|SPBC21C3.13|SPBC83.02c|SPAC1805.11c|SPAC3H1.07|SPBC18H10.14;SPAC664.04c|SPAC1B2.05|SPBC4C3.07|SPBC1711.06|SPBC646.09c|SPAC30C2.02|SPCC188.06c|SPCC1906.01|SPAC3H5.07|SPCC5E4.07|SPBC30D10.05c|SPBC21C3.08c|SPCC338.14|SPBC2D10.12|SPAC806.03c|SPBC3B9.01|SPBC1709.05|SPBC800.04c|SPAC31G5.17c|SPAC9G1.03c|SPAC1F7.05|SPAC18G6.1…
protein-containing complex assembly (GO:0065003)	0.000659477	0.00683184	0.477271	0.319065	1.62775	147	SPBC577.02|SPBC21C3.13|SPAC1B2.05|SPBC4C3.07|SPBC646.09c|SPAC31G5.17c|SPAPJ698.02c|SPBC11G11.03|SPCC1919.09|SPAC12B10.06c|SPBC1861.04c|SPBC1347.02|SPCC622.18|SPCC1393.03|SPAC328.10c|SPBC685.06|SPAC926.08c|SPBP22H7.08|SPBC215.02|SPCC737.08|SPCC285.15c;SPAC25G10.06|SPAC8C9.08|SPAC2F7.05c|SPBC609.05|SPAC821.05|SPBC29A10.06c|SPBC11C11.09c;SPAC3H5.12c|SPAC637.07|SPBC17D11.05|SPAC1B9.03c|SPCC18.14c|SPB…
cytoplasmic stress granule (GO:0010494)	0.00113045	0.0100206	0.45506	0.522947	1.90031	27	SPBP8B7.11|SPBC18H10.13;SPAC3H5.05c|SPAC57A7.04c|SPCC550.14|SPAC637.07|SPBC17D11.05|SPAC24H6.07|SPBC776.09|SPAC24B11.06c|SPBC18E5.11c|SPAC25G10.08|SPAC5D6.01;SPAC22A12.04c|SPBC17A3.04c|SPBC21B10.03c|SPAC30C2.04
preribosome (GO:0030684)	0.00628632	0.041123	0.407018	0.366397	1.60876	62	SPAC18G6.14c|SPBC11G11.03|SPCC1919.09|SPAC4F10.09c|SPAC22G7.05|SPBC646.10c|SPCC737.08|SPCC550.15c|SPAC1B9.03c|SPCC18.14c|SPAC222.06|SPAC17H9.05|SPBC19F5.05c|SPBC1A4.07c|SPAC8F11.04|SPCC1672.07|SPCC576.08c|SPAC1142.04|SPAC19D5.05c|SPBC83.15|SPAC23G3.06|SPAC6G9.02c|SPCC1183.07|SPBC19F5.02c|SPAC1B3.13|SPBC776.08c|SPAC1565.05
catalytic activity, acting on RNA (GO:0140098)	0.014213	0.0796946	0.38073	0.291878	1.42763	110	SPBC19C7.07c|SPBC19C7.06|SPAC16.04|SPCC736.03c|SPAC23A1.12c|SPBC11G11.05|SPBC691.04|SPCC1494.06c|SPCC1020.08|SPBC4C3.05c|SPAC4A8.08c|SPAC23G3.01|SPBP8B7.16c|SPBP8B7.20c|SPAC23C4.17|SPAC9G1.12|SPBP23A10.07|SPBC25D12.05|SPAC23C4.15|SPAC16C9.06c|SPAC1687.01|SPAC22G7.04|SPAC29E6.06c|SPAC4G9.08c|SPCC1795.11|SPBC776.09|SPBC18H10.12c|SPBC3B9.14c|SPBC16G5.10|SPBC17D1.06|SPBC211.04c|SPBC1709.02c|SPCC126.0…
nucleoplasm (GO:0005654)	0.0158014	0.0855457	0.352488	0.326166	1.47364	68	SPAC1687.04|SPCC1682.07|SPAC1B2.05|SPBC2D10.12|SPAC6G9.08|SPAC823.14|SPBC1604.08c|SPBC609.05|SPAC23G3.01|SPAC17G8.07|SPBC4.04c|SPAC23C4.15|SPAC23C4.19|SPAC27D7.14c|SPAC1142.04|SPBC211.04c|SPCC1682.02c|SPBC28F2.09|SPAC2G11.14|SPBC28F2.12|SPBC25D12.03c|SPBC32H8.12c|SPAC12G12.05c|SPBC83.08|SPCC16C4.18c|SPBC2D10.10c|SPAC29A4.18|SPAC17H9.02|SPBC16D10.09|SPAC22H12.02
nucleocytoplasmic transport (GO:0006913)	0.0214408	0.108588	0.352488	0.307897	1.39314	71	SPBC1709.05|SPAC1B1.03c|SPCC1919.09|SPBP4H10.13;SPAC23C11.02c|SPCC1393.03|SPBC1604.08c|SPBC16H5.08c|SPBC17G9.04c|SPBC14F5.03c|SPCC285.15c;SPAC25G10.06|SPCC550.15c|SPAC16C9.03|SPBC28F2.02|SPAC890.06|SPCC4B3.07|SPCC18B5.07c|SPCC1840.03|SPAC6F6.03c|SPAC30D11.04c|SPAC17G6.14c|SPBC651.01c|SPAC6G9.02c|SPBC1D7.04|SPAC1071.07c|SPAC2F3.06c|SPBC776.08c|SPAC23D3.06c|SPBC14F5.06
catalytic activity, acting on a tRNA (GO:0140101)	0.0356321	0.147217	0.321776	0.342531	1.42373	46	SPBC19C7.07c|SPBC19C7.06|SPAC16.04|SPCC736.03c|SPAC23A1.12c|SPCC1020.08|SPAC4A8.08c|SPAC23C4.17|SPAC9G1.12|SPBC25D12.05|SPAC29E6.06c|SPBC1709.02c|SPBC17A3.04c|SPBC2G2.12|SPBC17G9.03c|SPBC19C2.13c|SPAC4G8.07c|SPBC1709.06|SPBC1306.02|SPAC26F1.13c|SPAC2F7.13c
ligase activity (GO:0016874)	0.0425514	0.159061	0.321776	0.288454	1.30516	71	SPBC56F2.09c|SPBC19C7.06|SPCC736.03c|SPAC23A1.12c|SPAC12B10.04|SPBC1604.11|SPAC1486.06|SPBC2G2.08|SPAC4A8.08c|SPBC405.01|SPCC191.02c|SPBC839.16|SPAC29E6.06c|SPAC22G7.06c|SPBC1709.02c|SPAC222.12c|SPBC17A3.04c|SPBC29A10.13|SPBC2G2.12|SPBC17G9.03c|SPCC1827.03c
pteridine-containing compound biosynthetic process (GO:0042559)	0.0580357	0.189171	0.282013	0.644371	1.55516	7	SPBC30D10.05c|SPBC2G2.08|SPBC839.16|SPBC1711.04
signal sequence binding (GO:0005048)	0.0806045	0.218188	0.252961	0.482882	1.47963	15	SPCC188.06c|SPAC1B1.03c|SPBC1604.08c|SPBC14F5.03c|SPAC6B12.12|SPCC1840.03|SPAC30D11.04c|SPBC354.02c|SPAC2F3.06c
nuclear periphery (GO:0034399)	0.0893372	0.233766	0.257206	0.348189	1.31831	31	SPAC1B1.03c|SPBC1604.08c|SPCC576.10c|SPBC17G9.04c|SPBC14F5.03c|SPBC16G5.01|SPAC17H9.05|SPCC18B5.07c|SPCC1840.03
tRNA metabolic process (GO:0006399)	0.0909091	0.233979	0.287857	0.277262	1.26578	76	SPBC19C7.07c|SPBC19C7.06|SPAC16.04|SPCC736.03c|SPAC23A1.12c|SPCC1020.08|SPBC36.07|SPAC4A8.08c|SPAC23C4.17|SPAC57A10.10c|SPAC9G1.12|SPBC25D12.05|SPAC29E6.06c|SPAC22A12.12c|SPBC18H10.12c|SPBC16G5.10|SPBC1709.02c|SPCC126.03|SPBC17A3.04c|SPBC2G2.12|SPBC17G9.03c|SPAC30C2.04|SPCC18.13|SPBC19C2.13c|SPAC4G8.07c|SPAC6F12.16c|SPBC1709.06|SPBC1306.02|SPAC26F1.13c|SPAC2F7.13c|SPAC17H9.02|SPAC3F10.03|SPCC1840…
nitrogen cycle metabolic process (GO:0071941)	0.105134	0.257908	0.216543	0.484945	1.41261	12	SPAC3H1.07|SPBC56F2.09c
protein folding (GO:0006457)	0.108772	0.262726	0.257206	0.273554	1.21698	64	SPCC1322.16|SPBC1709.05|SPCC830.07c|SPBC543.02c|SPAC57A7.12|SPCC550.06c|SPBC215.02|SPBC12D12.03|SPAC2F3.12c|SPBC25H2.05|SPBC1711.08|SPAC4F10.14c|SPAC926.04c|SPAC664.11|SPBC25H2.12c|SPBC337.05c|SPBC646.11|SPAC110.04c|SPCC645.14c|SPBC1A4.08c|SPAC1420.02c|SPBC106.06
hydrolase activity, acting on carbon-nitrogen (but not peptide) bonds (GO:0016810)	0.115274	0.264032	0.224966	0.333292	1.2619	31	SPAC3H1.07|SPBC1198.02|SPCPB16A4.03c|SPAC26A3.11|SPAP27G11.09c|SPBC2G2.08|SPAC977.12|SPBC839.16|SPCC126.12|SPCC965.14c|SPAC22G7.06c|SPCC1442.14c
molecular sequestering activity (GO:0140313)	0.119403	0.264032	0.188204	0.712198	1.38706	4	SPAC8E11.02c|SPBC26H8.06|SPBC1734.11|SPAC17A2.13c
protein sequestering activity (GO:0140311)	0.119403	0.264032	0.188204	0.712198	1.38706	4	SPAC8E11.02c|SPBC26H8.06|SPBC1734.11|SPAC17A2.13c
unfolded protein binding (GO:0051082)	0.121302	0.264505	0.222056	0.304462	1.2412	41	SPBC1709.05|SPCC830.07c|SPAC57A7.12|SPCC550.06c|SPBC215.02|SPBC12D12.03|SPBC25H2.05|SPAC4F10.14c|SPAC926.04c|SPAC664.11|SPBC25H2.12c|SPBC337.05c|SPBC646.11|SPBC1A4.08c|SPAC1420.02c|SPBC106.06
nucleotidyltransferase activity (GO:0016779)	0.127479	0.266856	0.2114	0.330072	1.2553	32	SPCC1906.01|SPBC11G11.05|SPBC27.08c|SPBC4C3.05c|SPAC4D7.09|SPAC23G3.01|SPBC13G1.02|SPBP23A10.07|SPAC23C4.15|SPAC1687.01|SPAC4G9.08c|SPAC8C9.15c|SPBC3B9.07c|SPBC28F2.12|SPBC19C2.13c
1,3-beta-glucanosyltransferase activity (GO:0042124)	0.137255	0.28354	0.166934	0.845418	1.31167	2	SPAC19B12.02c|SPAC11E3.13c
molecular carrier activity (GO:0140104)	0.140992	0.287478	0.191892	0.41401	1.29014	17	SPAC1B1.03c|SPAC1142.06|SPBC1604.08c|SPBC14F5.03c|SPCC1840.03
transcription, DNA-templated (GO:0006351)	0.17757	0.339982	0.186433	0.281455	1.17129	45	SPCC1682.07|SPBC11G11.05|SPBC4C3.05c|SPAC23G3.01|SPBC29A10.12|SPBP23A10.07|SPAC23C4.15|SPAC1687.01|SPBC30D10.02|SPAC4G9.08c|SPAC27D7.14c|SPBC3B9.07c|SPBC28F2.09|SPAC2G11.14|SPBC28F2.12|SPAC222.09|SPBC1289.07c|SPAC12G12.05c|SPCC16C4.18c
tetrapyrrole metabolic process (GO:0033013)	0.18648	0.351324	0.155242	0.492501	1.31258	9	SPAC1F12.10c|SPAC2F3.09|SPCC1739.06c|SPAC4D7.06c|SPAC222.11|SPAC1805.06c
nucleocytoplasmic carrier activity (GO:0140142)	0.220874	0.385008	0.144631	0.396288	1.18746	13	SPAC1B1.03c|SPBC1604.08c|SPBC14F5.03c|SPCC1840.03|SPAC2F3.06c
peptide N-acetyltransferase activity (GO:0034212)	0.22332	0.385008	0.128143	0.722131	1.2831	3	SPCC338.07c|SPCC16C4.12|SPBC1215.02c
DNA replication (GO:0006260)	0.292553	0.468682	0.130106	0.348001	1.10581	18	SPAC1687.04|SPAC1B2.05|SPCC1672.02c|SPBC4.04c|SPCC1753.01c|SPBC211.04c|SPCC1682.02c|SPBC25D12.03c
transcription elongation regulator activity (GO:0003711)	0.312384	0.495398	0.101351	0.843483	1.12251	1	SPAC23C4.19
transferase activity, transferring one-carbon groups (GO:0016741)	0.38961	0.60406	0.123842	0.243511	1.03258	51	SPCPB16A4.03c|SPBC16E9.05|SPCC4G3.04c|SPCC1739.06c|SPAC24C9.12c|SPBP8B7.20c|SPAC23C4.17|SPAC9G1.12|SPBC25D12.05|SPBC8D2.10c|SPAC22G7.06c
snoRNA metabolic process (GO:0016074)	0.415179	0.62676	0.0956031	0.430009	1.0378	7	SPAC29A4.04c|SPAC22A12.12c|SPAC222.09|SPBC2D10.10c|SPAC17H9.02
cell surface (GO:0009986)	0.468447	0.680983	0.0934449	0.331264	0.992614	13	SPAC1039.02|SPAC19B12.02c|SPAC977.12|SPAC926.04c|SPAC1786.02|SPAC11E3.13c|SPAC1705.03c
sulfur compound metabolic process (GO:0006790)	0.485944	0.699937	0.123257	0.211213	0.985646	86	SPAC1782.11|SPAC4F8.14c|SPCC1223.02|SPBC26H8.01|SPCC584.01c|SPBC776.03|SPBC27.08c|SPAC24C9.03|SPCC1739.06c|SPBC428.11|SPAPB2B4.02|SPBC19F5.04|SPAC23H4.10c|SPAC664.11|SPAC56F8.10|SPAC1071.02|SPCC191.02c|SPBC14F5.05c|SPBC8D2.18c
mitotic spindle (GO:0072686)	0.529915	0.725334	0.0956031	0.261117	0.965765	28	SPAC1B1.03c|SPBC1604.08c|SPBC1A4.07c|SPCC1672.07|SPAC6F6.03c|SPAC8E11.02c|SPBC557.03c|SPBC651.01c|SPBC19F5.02c|SPAC2F3.06c
nucleobase-containing small molecule metabolic process (GO:0055086)	0.530928	0.725334	0.135002	0.194132	0.975208	133	SPCC4G3.17|SPBC3D6.06c|SPCC1906.01|SPCC338.14|SPAC1F7.05|SPAC57A10.12c|SPAC4F8.14c|SPAC3G6.03c|SPAC23A1.03|SPAC1039.02|SPBC1198.02|SPCPB16A4.03c|SPBC1604.11|SPAC1486.06|SPAC24C9.03|SPBC2G2.08
protein transporter activity (GO:0140318)	0.523227	0.725334	0.0875697	0.316528	0.922024	12	SPBC27B12.13|SPBC14C8.02|SPAC13G6.04|SPBC354.02c|SPBC36B7.03
cell adhesion (GO:0007155)	0.548983	0.734437	0.0702813	0.726724	0.96713	1	SPAPB2C8.01
cell adhesion mediator activity (GO:0098631)	0.548983	0.734437	0.0702813	0.726724	0.96713	1	SPAPB2C8.01
general transcription initiation factor activity (GO:0140223)	0.556675	0.734437	0.0857844	0.301181	0.922871	15	SPCC1682.07|SPBC30D10.02|SPBC28F2.09|SPAC2G11.14|SPAC12G12.05c|SPCC16C4.18c|SPAC22H12.02|SPBC28F2.11
DNA recombination (GO:0006310)	0.718346	0.859194	0.0736213	0.269067	0.826837	16	SPAC1B2.05|SPCC1672.02c|SPBC4.04c|SPBC409.05|SPCC1753.01c|SPBC211.04c|SPCC1682.02c|SPBC25D12.03c
DNA repair (GO:0006281)	0.72238	0.859194	0.0780892	0.227212	0.864111	32	SPCC1682.07|SPAC1B2.05|SPBC2D10.12|SPAC17G8.07|SPBC4.04c|SPCC1753.01c|SPBC211.04c|SPCC1682.02c
snRNA metabolic process (GO:0016073)	0.71875	0.859194	0.0699459	0.283328	0.779597	10	SPAC29A4.04c|SPAC22A12.12c|SPBC16G5.10|SPCC126.03|SPAC1782.10c
chromatin organization (GO:0006325)	0.790036	0.931504	0.0855357	0.19005	0.856314	69	SPBC1347.02|SPAC823.14|SPCC576.10c|SPBC609.05|SPBC365.10|SPAC23G3.01|SPAC3G6.01|SPAC17G8.07|SPAC926.04c|SPBP23A10.05|SPBC8D2.03c;SPBC1105.12;SPAC1834.03c|SPCC622.08c;SPAC19G12.06c|SPBC1734.11|SPCC645.08c|SPBC32H8.12c|SPAC12G12.05c|SPCC1620.14c|SPBC83.08|SPCC16C4.18c|SPCC1235.05c|SPBC2D10.10c|SPAC29A4.18|SPCC364.06|SPBC23E6.09|SPAC22H12.02|SPAC23G3.10c|SPAC2F7.08c|SPBC725.08
ATPase activity (GO:0016887)	0.810127	0.942147	0.0937465	0.179506	0.860068	102	SPAC1B2.05|SPBC1709.05|SPAC1142.06|SPBC691.04|SPCC576.10c|SPCC1494.06c|SPBC16H5.08c|SPCC737.08|SPCC417.08|SPBP8B7.16c|SPAC3G6.01|SPAC926.04c|SPAC664.11|SPBC4.04c|SPAC27E2.03c|SPAC16C9.06c|SPCC1795.11|SPBC776.09|SPBC17D1.06|SPBC211.04c|SPAC222.12c|SPAC1071.10c|SPAC17G6.14c|SPAC1006.07|SPCC1682.02c
cellular amino acid metabolic process (GO:0006520)	0.822917	0.949985	0.105521	0.172923	0.870307	136	SPAC3H1.07|SPBC56F2.09c|SPBC21C3.08c|SPBC19C7.06|SPBC582.08|SPAPYUG7.05|SPCC736.03c|SPAC23A1.12c|SPBC776.03|SPAC26A3.11|SPBC3H7.07c;REV__SPBC3H7.07c|SPAC977.12|SPAC4A8.08c|SPAC24C9.12c|SPBC428.11|SPCC364.07|SPBC19F5.04|SPAPB1E7.07|SPAC9E9.03|SPAC56F8.10|SPCC132.04c|SPBC14F5.05c|SPBC8D2.18c|SPAC29E6.06c|SPAC22G7.06c
cargo receptor activity (GO:0038024)	0.861368	0.987115	0.0488971	0.571213	0.760175	1	SPCC970.06
P-body (GO:0000932)	0.872063	0.992129	0.0645031	0.229008	0.713638	17	SPAC12B10.04|SPAC22G7.04|SPBC19G7.10c|SPBC776.09|SPBC18E5.11c|SPCC18.06c
mitotic cell cycle phase transition (GO:0044772)	0.883227	0.997602	0.0541201	0.320523	0.671699	5	SPBC365.10|SPBC11B10.09|SPAC664.02c|SPAC10F6.08c|SPCC16C4.11
protein methyltransferase activity (GO:0008276)	0.892421	0.999944	0.0602484	0.229757	0.669267	12	SPBC8D2.10c|SPBC2D10.10c|SPAC16E8.14c|SPBP8B7.08c|SPBC1215.02c|SPAC890.07c|SPAC26A3.17c|SPCC4G3.16|SPAC8F11.09c|SPBC16H5.11c|SPAC806.04c|SPCC1393.13
signaling receptor activity (GO:0038023)	0.898039	0.999944	0.0496901	0.405276	0.628786	2	SPAC30D11.11|SPAC26H5.07c
catalytic activity, acting on DNA (GO:0140097)	0.965333	1	0.0606404	0.181423	0.620442	22	SPAC1B2.05|SPAC139.01c|SPBC4.04c|SPBC211.04c|SPCC1682.02c|SPBC25D12.03c|SPCC1620.14c|SPBC83.08|SPCC1235.05c
chromosome (GO:0005694)	1	1	0.095288	0.129729	0.643175	128	SPAC1687.04|SPAC1B2.05|SPCC576.10c|SPBC17G9.04c|SPBC16G5.01|SPBC609.05|SPBC365.10|SPAC23G3.01|SPCC4G3.18|SPCC31H12.05c|SPCC1672.02c|SPAC3G6.01|SPBC660.11|SPAC17G8.07|SPBC4.04c|SPAC1071.02|SPAC23C4.19|SPAC4G9.08c|SPAC630.14c|SPCC1753.01c|SPBC211.04c|SPBP23A10.05|SPBC557.03c|SPCC1682.02c|SPBC8D2.03c;SPBC1105.12;SPAC1834.03c|SPAC2G11.14|SPBC28F2.12|SPCC622.08c;SPAC19G12.06c|SPBC25D12.03c|SPCC24B10.0…
guanyl-nucleotide exchange factor activity (GO:0005085)	0.971246	1	0.036685	-0.189143	-0.551268	18	SPAC23D3.13c|SPAC23H4.14|SPAC16E8.09
isomerase activity (GO:0016853)	0.953271	1	0.0687943	0.165331	0.688034	45	SPAC1687.21|SPBC1347.02|SPAC5H10.03|SPAC29A4.04c|SPBC16H5.05c|SPAC644.08|SPCC126.03|SPAC26F1.06|SPBC365.14c|SPBC2G2.16|SPBC28F2.03
mRNA metabolic process (GO:0016071)	0.980794	1	0.0252713	-0.159203	-0.666155	105	SPBC530.14c|SPAC20H4.09|SPAC1002.10c|SPCC31H12.08c|SPBC23E6.01c|SPBC2F12.03c|SPBC577.07|SPCC1919.05|SPAC26A3.12c|SPBC2F12.08c|SPCC16C4.09|SPAC20G8.06|SPACUNK4.11c|SPBC3B9.08c|SPAC9.03c|SPCC550.02c|SPAC20G4.08|SPBC337.06c|SPAC2F7.14c|SPAC1952.06c|SPAC27D7.07c|SPBC3E7.14|SPBC20F10.09|SPBC25B2.01|SPBC1709.15c
nuclear pore (GO:0005643)	0.962349	1	0.0343431	-0.183462	-0.64503	41	SPAC22G7.09c|SPBC1921.03c|SPAPB1A10.03|SPAC22G7.02
nucleus (GO:0005634)	0.921509	1	0.0149447	-0.17029	-0.845055	1022	SPCP31B10.06|SPCC965.07c;SPCC191.09c|SPCC645.04|SPBC23G7.10c|SPBC17D11.03c|SPAC3F10.08c|SPBC365.12c|SPCC297.03|SPAC22G7.09c|SPCC1281.07c|SPBC530.14c|SPBC36.12c|SPAC20H4.09|SPACUNK4.17|SPAC1039.06|SPAC21E11.04|SPBC16D10.01c|SPCC330.09|SPAC18B11.04|SPBC3B9.06c|SPBC11C11.06c|SPAC31A2.05c|SPCC1442.02|SPBC12C2.12c|SPAC3C7.05c|SPCC1450.13c|SPCC417.12|SPBC1921.03c|SPBC336.04|SPAC19G12.09|SPAC1D4.09c|SPA…
protein glycosylation (GO:0006486)	1	1	0.0328701	-0.11738	-0.398639	34	SPAC5D6.06c|SPAPB1E7.09|SPBC1734.12c|SPAC17C9.07|SPBC19C7.12c|SPAC6F6.05|SPAC1006.05c|SPBC12C2.11|SPAC1002.03c|SPBC342.01c|SPAC22A12.07c|SPAC1834.05|SPAC31G5.16c
protein maturation (GO:0051604)	0.926205	1	0.0361492	-0.195939	-0.674183	35	SPAC1006.01|SPAC4A8.04
protein targeting (GO:0006605)	0.961057	1	0.0305608	-0.1674	-0.646089	61	SPBC3B9.19|SPAC19A8.05c|SPBP4H10.12|SPAC23D3.13c|SPAC17C9.06|SPCC1322.05c|SPBC16C6.02c|SPAC144.06|SPBP23A10.16|SPAC24H6.02c|SPAC589.04|SPAC17C9.09c|SPAC824.05|SPAC2F3.02|SPCC970.09|SPCC126.15c|SPBC1289.09|SPBC13G1.03c|SPBC1685.03|SPAC17H9.16|SPAC4G8.02c|SPAP14E8.03|SPBC19G7.17|SPBC1921.05
regulation of transcription, DNA-templated (GO:0006355)	0.996403	1	0.0738053	0.134217	0.61913	78	SPCC1682.07|SPAC823.14|SPBC83.17|SPBC215.02|SPBC365.10|SPAC23G3.01|SPBC6B1.08c|SPAC17G8.07|SPAC926.04c|SPCC4B3.07|SPAC23C4.19|SPAC27D7.14c|SPAC630.14c|SPAC24B11.06c|SPBP23A10.05
secondary metabolic process (GO:0019748)	0.982609	1	0.0502948	0.233602	0.524475	6	SPAC23G3.03|SPBC2G5.06c
transferase activity, transferring aldehyde or ketonic groups (GO:0016744)	0.974308	1	0.0463228	0.293703	0.52186	3	SPBC2G5.05|SPBP35G2.07
transferase activity, transferring glycosyl groups (GO:0016757)	0.922619	1	0.0357691	-0.193573	-0.685658	42	SPAC22F8.05|SPAC5D6.06c|SPAPB1E7.09|SPBC1734.12c|SPAC17C9.07|SPAC1002.17c|SPBC19C7.12c|SPAC1805.16c|SPAC1006.05c|SPACUNK4.16c|SPAC2F3.13c|SPAC23C11.13c|SPBC342.01c|SPAC328.03|SPAC4D7.08c|SPAC22A12.07c|SPAC1834.05|SPAC31G5.16c
transferase activity, transferring sulfur-containing groups (GO:0016782)	0.979911	1	0.0516356	0.213529	0.515341	7	SPAPB2B4.02|SPBC19C2.13c|SPCC1235.02|SPBC21D10.11c|SPAC1952.09c|SPAC4H3.07c
ubiquinone biosynthetic process (GO:0006744)	0.917411	1	0.0546808	0.2574	0.621223	7	SPCC4G3.04c|SPBC2D10.18
transcription coregulator activity (GO:0003712)	0.795041	0.931504	0.0474483	-0.267365	-0.740137	15	SPAC29B12.11c|SPBP16F5.03c
cell wall (GO:0005618)	0.676519	0.830409	0.0545681	-0.30621	-0.833764	14	SPBP4G3.02|SPCC757.12
cell wall organization or biogenesis (GO:0071554)	0.682021	0.830409	0.0495902	-0.248333	-0.868319	38	SPBP4H10.04|SPAC3C7.05c|SPCC757.12|SPBC2D10.05|SPBC337.07c
phosphotransferase activity, for other substituted phosphate groups (GO:0016780)	0.68231	0.830409	0.0585938	-0.366717	-0.825813	7	SPAC22A12.08c|SPAC13G6.03|SPAC22A12.10
transcription coactivator activity (GO:0003713)	0.666667	0.830409	0.0566484	-0.328046	-0.835943	11	SPAC29B12.11c|SPBP16F5.03c
lipoprotein biosynthetic process (GO:0042158)	0.644876	0.809965	0.0602484	-0.361913	-0.848739	8	SPBC3B9.06c
actin binding (GO:0003779)	0.631259	0.799256	0.0541201	-0.262432	-0.891258	34	SPAC4A8.05c|SPBC13E7.09|SPAC4F8.10c|SPBC1778.06c|SPAC25G10.09c|SPCC645.05c|SPAC27F1.02c|SPAC4F8.13c|SPAC15A10.16|SPCC126.06|SPCC306.09c
mitochondrial gene expression (GO:0140053)	0.624224	0.796773	0.0557104	-0.27362	-0.905867	30	SPAP8A3.11c|SPBC11B10.04c|SPCC18B5.08c|SPAC4G8.09|SPCC16C4.01|SPAC1D4.10|SPCC4B3.01|SPAC23C11.17|SPBC1289.06c|SPBC1711.18
nucleoside-triphosphate diphosphatase activity (GO:0047429)	0.611632	0.787101	0.0656814	-0.480218	-0.904	4	SPBC725.05c|SPCC830.10
iron-sulfur cluster assembly (GO:0016226)	0.586777	0.761355	0.0615707	-0.322243	-0.892051	15	SPBC3B9.19|SPAC15A10.01|SPBC337.10c|SPBC13G1.06c|SPAC22E12.10c|SPAC227.13c
phosphoprotein phosphatase activity (GO:0004721)	0.581583	0.760905	0.0609039	-0.319374	-0.912685	17	SPBP4H10.04|SPAC57A7.08|SPBC26H8.05c|SPBC3F6.01c|SPAC10F6.17c|SPAC4A8.03c|SPCC4F11.02|SPBC16H5.07c
generation of precursor metabolites and energy (GO:0006091)	0.555851	0.734437	0.0538979	-0.232908	-0.944626	85	SPBC354.12|SPCC794.01c|SPAC17A2.05|SPAC25H1.10c|SPBC1773.17c|SPBC1604.05|SPAC1296.02|SPAC1805.02c|SPAC3A12.18|SPAC6C3.04|SPCC794.12c|SPCC330.12c|SPBC902.05c|SPAC1002.09c|SPCC1840.07c|SPCC1620.08|SPBC776.15c|SPCC13B11.01|SPBC17G9.11c|SPAC4G9.12|SPAC20G8.04c|SPAC2F3.11|SPBC23E6.06c|SPCC24B10.21|SPAC22E12.10c
GTPase activity (GO:0003924)	0.531295	0.725334	0.0602484	-0.261516	-0.962105	49	SPAP8A3.11c|SPBC19F8.01c|SPBC4F6.18c|SPCC777.05|SPBC32F12.04|SPBC12C2.08|SPAC1565.06c|SPBC1706.03
transferase activity, transferring nitrogenous groups (GO:0016769)	0.527157	0.725334	0.0650878	-0.328935	-0.958697	18	SPBC1773.03c|SPCC569.07|SPBC428.02c|SPAC56E4.03
vitamin metabolic process (GO:0006766)	0.523664	0.725334	0.0632191	-0.287607	-0.960704	31	SPCC1450.13c|SPAC1952.08c|SPAC1002.19|SPAC29B12.04|SPAC222.08c|SPAC9E9.11;SPCC1281.04|SPCC18.16c
protein tag (GO:0031386)	0.449187	0.659087	0.0857844	-0.679612	-1.03228	2	SPAC589.10c;SPAC6G10.11c;SPBC337.08c
disulfide oxidoreductase activity (GO:0015036)	0.439932	0.651598	0.0770737	-0.402058	-1.02454	11	SPCC1281.07c
deacetylase activity (GO:0019213)	0.435484	0.651152	0.0870516	-0.616009	-1.06272	3	SPBC16D10.07c|SPAC19G12.03
actin cortical patch (GO:0030479)	0.40843	0.622559	0.0730744	-0.283574	-1.03461	47	SPBC13E7.09|SPBC12C2.08|SPBC725.09c|SPAC4F8.10c|SPBC9B6.08|SPBC1778.06c|SPBC23G7.08c|SPBC21D10.12|SPBC31F10.07|SPAC25G10.09c|SPAC23A1.17|SPAC27F1.02c|SPAC20G8.05c|SPCC794.11c|SPCC126.06|SPAC767.01c
meiotic nuclear division (GO:0140013)	0.392447	0.60406	0.0815265	-0.394744	-1.07483	14	SPBC19C7.10|SPAPB1A10.09|SPCC736.14|SPBC3H7.15|SPCC188.07|SPAC1556.01c|SPAC328.02
metal ion homeostasis (GO:0055065)	0.332824	0.522534	0.08654	-0.330017	-1.10237	31	SPCC1183.11|SPAC2E1P3.04|SPAC15A10.01|SPAC17D4.03c|SPBC29A3.01|SPCC1795.02c|SPAC821.10c|SPAC27F1.08|SPAC23C11.17|SPCC1672.11c|SPAC521.04c|SPAC227.13c|SPAC17A2.14|SPAC1F7.07c|SPAC23C11.14|SPAPB2B4.04c|SPAC23G3.02c|SPBC119.08
transferase activity, transferring acyl groups (GO:0016746)	0.290179	0.468682	0.0928481	-0.319306	-1.11967	39	SPAC21E11.04|SPAC13G7.05|SPBC16A3.10|SPBC1718.04|SPAC6C3.04|SPAC56E4.06c|SPCC1235.15|SPAC1A6.09c|SPAC4G9.09c|SPBC18E5.02c|SPCP1E11.05c|SPBC776.15c
division septum (GO:0000935)	0.279107	0.457806	0.0992333	-0.385096	-1.1532	20	SPCC1223.06|SPAC3A12.14|SPAC6G10.02c|SPAC17G8.12|SPAC16E8.09
lipid transfer activity (GO:0120013)	0.279933	0.457806	0.102449	-0.445978	-1.17046	12	SPBC16C6.02c|SPBC646.08c|SPBC1271.12|SPBC2F12.05c|SPBC20F10.07|SPAC23H4.01c|SPCC23B6.01c|SPCC23B6.04c|SPAC3H8.10
peroxisome organization (GO:0007031)	0.273063	0.456073	0.109684	-0.54844	-1.17788	6	SPBC12C2.08|SPBC582.09|SPAC767.01c|SPBC13G1.03c
microtubule cytoskeleton (GO:0015630)	0.243394	0.41089	0.0992333	-0.293731	-1.15313	70	SPBC530.14c|SPCC1223.06|SPBC1921.03c|SPBC19F8.01c|SPAC3A12.14|SPAC4A8.05c|SPBC32F12.04|SPAPB1A10.09|SPAC1565.06c|SPBC428.13c|SPAC16E8.09|SPBC4F6.06|SPCC736.14|SPBC2G2.06c|SPBC31F10.07|SPAC823.03|SPBC3H7.15
exonuclease activity (GO:0004527)	0.221488	0.385008	0.116234	-0.442716	-1.22555	15	SPBC336.04|SPCC31H12.08c|SPAC26A3.12c|SPCC16C4.09|SPACUNK4.11c
lipid metabolic process (GO:0006629)	0.223514	0.385008	0.0999277	-0.272184	-1.14393	110	SPAC4D7.02c|SPAC13G7.05|SPAC1952.13|SPAC26F1.04c|SPCC4B3.04c|SPAC1786.01c|SPAC19A8.03|SPBPJ4664.01|SPBC16A3.10|SPAC5D6.06c|SPBC337.16|SPBC1718.04|SPBC26H8.11c|SPBC1734.12c|SPAC17C9.07|SPCC1235.15|SPAC22H12.03|SPAC823.11|SPAC1A6.09c|SPAC22A12.08c|SPBC646.08c|SPBC18E5.02c|SPAC13G6.03|SPAC1A6.03c|SPCP1E11.05c|SPBC1271.12|SPAC31G5.15|SPAC17C9.12|SPAC4A8.07c|SPAC22A12.10|SPBC19C2.15c|SPAC6F12.13c|SPCC…
phagophore assembly site (GO:0000407)	0.22561	0.385008	0.129443	-0.795569	-1.20841	2	SPAC7D4.04|SPBC1703.10
telomere organization (GO:0032200)	0.224283	0.385008	0.116739	-0.470565	-1.23498	12	SPBC19C7.10|SPBC16D10.07c|SPAC14C4.05c|SPAC458.03|SPAC3A11.08|SPCC188.07|SPAC1556.01c
endoplasmic reticulum membrane (GO:0005789)	0.19546	0.356829	0.10673	-0.274022	-1.16438	118	SPAC23A1.15c|SPAC13G7.05|SPCC4B3.04c|SPBP16F5.08c|SPBC16A3.10|SPAC5D6.06c|SPAPB1E7.09|SPBC337.16|SPAC29B12.07|SPBC17A3.05c|SPBC1718.04|SPBC1711.03|SPBC27.01c|SPBC1734.12c|SPAC17C9.07|SPCC1235.15|SPAC823.11|SPAC1A6.09c|SPBC18E5.02c|SPAC13G6.03|SPBC1703.10|SPBC16A3.09c|SPBC119.09c|SPCP1E11.05c|SPAC2F3.02|SPAC17C9.12|SPAC22A12.10|SPBC19C2.15c|SPAC6F6.05|SPCC16A11.10c|SPAC12B10.02c|SPCC1281.03c|SPBP1…
small molecule sensor activity (GO:0140299)	0.190207	0.351324	0.13649	-0.629404	-1.26494	5	SPAC1834.08|SPBC14F5.13c
topological DNA entrapment activity (GO:0061776)	0.189024	0.351324	0.142901	-0.810675	-1.23136	2	SPAC10F6.09c|SPBP4H10.06c
protein modification by small protein conjugation or removal (GO:0070647)	0.173913	0.337091	0.123842	-0.326644	-1.20944	50	SPBC1105.09|SPAC19A8.05c|SPBC577.07|SPAC12B10.01c|SPCC338.05c|SPAC589.10c;SPAC6G10.11c;SPBC337.08c|SPBC215.03c|SPBC21D10.09c|SPAC27F1.03c|SPAC1565.07c|SPCC790.02|SPAC3F10.13|SPAC15A10.11|SPBC713.02c|SPBC1E8.02|SPAC328.06
enzyme regulator activity (GO:0030234)	0.169935	0.333497	0.118288	-0.288914	-1.18997	95	SPBC26H8.04c|SPAC18B11.04|SPCC1442.02|SPAC7D4.04|SPBC3B9.19|SPBC543.04|SPCC338.12|SPAC23D3.13c|SPAC18B11.11|SPCC16C4.08c|SPAC630.13c|SPAC23H4.14|SPAC1952.17c|SPBC354.13|SPAC589.10c;SPAC6G10.11c;SPBC337.08c|SPBC428.13c|SPBC17G9.08c|SPAC16E8.09|SPCC1919.03c|SPAC4F10.04|SPCC737.06c|SPCC830.06|SPBC23G7.08c
protein deacetylase activity (GO:0033558)	0.156504	0.311027	0.158514	-0.831646	-1.26321	2	SPBC16D10.07c
transferase activity, transferring alkyl or aryl (other than methyl) groups (GO:0016765)	0.143541	0.288922	0.145516	-0.42636	-1.31285	22	SPCC965.07c;SPCC191.09c|SPCC1281.07c|SPCC1450.13c|SPBPJ4664.01|SPAC688.04c
endoplasmic reticulum (GO:0005783)	0.12529	0.266856	0.131458	-0.258378	-1.19236	237	SPCP31B10.06|SPAC4D7.02c|SPBC365.12c|SPAC23A1.15c|SPBC16A3.02c|SPAC13G7.05|SPCC320.05|SPBP4G3.02|SPCC757.12|SPCC4B3.04c|SPBC18A7.01|SPCC1183.11|SPAC5D6.04|SPBC887.12|SPBP16F5.08c|SPBC16A3.10|SPAC5D6.06c|SPAC688.04c|SPAPB1E7.09|SPBC1683.03c|SPBC337.16|SPAC17D4.03c|SPAC29B12.07|SPBC17A3.05c|SPBC1718.04|SPBC3B8.06|SPAC343.12|SPBC31E1.04|SPBC1711.03|SPAC732.01|SPCC1795.02c|SPBC27.01c|SPAC227.06|SPAC5…
establishment or maintenance of cell polarity (GO:0007163)	0.127466	0.266856	0.151149	-0.382302	-1.29835	34	SPCC297.03|SPCC1223.06|SPAC6G10.02c|SPAC16E8.09|SPBC4F6.06|SPCC736.14|SPBC21D10.12|SPAC3G9.05|SPAC20G8.05c|SPBC2F12.05c|SPAC15A10.16|SPAC3C7.12|SPBC16G5.05c|SPAC23C11.11|SPAC23H4.01c|SPAC13A11.01c|SPCC23B6.01c|SPAC23C4.08|SPBC16H5.11c
conjugation with cellular fusion (GO:0000747)	0.114334	0.264032	0.170932	-0.551539	-1.38262	10	SPAC4A8.04|SPBC2D10.05|SPAC16E8.09|SPAC27F1.02c|SPAC3C7.12
mitochondrion (GO:0005739)	0.117179	0.264032	0.135002	-0.25049	-1.17599	301	SPAC4D7.02c|SPBC17D11.03c|SPAC343.06c|SPBC16A3.02c|SPCC757.07c|SPBC11C11.06c|SPAP8A3.11c|SPAC1039.10|SPCC338.06c|SPAC17A2.05|SPAC26F1.04c|SPBC3B9.19|SPBC11B10.04c|SPAC9E9.15|SPAC14C4.01c|SPCC18B5.08c|SPBC32F12.03c|SPBC428.02c|SPAC4A8.05c|SPBC2G2.04c|SPCC14G10.01|SPBC11G11.01|SPBC800.14c|SPBC4F6.17c|SPBPJ4664.01|SPCC1450.12|SPBC106.03|SPBP16F5.08c|SPBC30D10.08|SPBC12C2.08|SPAC15A10.01|SPBC337.16|S…
transmembrane transport (GO:0055085)	0.119403	0.264032	0.140406	-0.286619	-1.22621	122	SPCC320.05|SPBC887.02|SPBC3B9.19|SPCC1183.11|SPAC2F3.08|SPAC5D6.04|SPAC17C9.10|SPAC15A10.01|SPBC1683.03c|SPCC965.06|SPCC1183.09c|SPAC17D4.03c|SPBC12C2.13c|SPAC139.02c|SPAC25H1.10c|SPAC17A2.03c|SPBC29A3.01|SPCC61.01c|SPAC1635.01|SPAC732.01|SPCC1795.02c|SPAC30.04c|SPBC887.17|SPBC9B6.09c|SPBC3B8.04c|SPAC24H6.02c|SPCC737.09c|SPAC977.14c;SPAC750.01|SPAC14C4.07|SPAC2G11.09|SPBC530.10c|SPAC1B3.16c|SPAC2…
microtubule cytoskeleton organization (GO:0000226)	0.103668	0.257908	0.173748	-0.456777	-1.36786	20	SPAC3A12.14|SPBC32F12.04|SPAPB1A10.09|SPAC328.04|SPAC4F10.04|SPCC736.14|SPAC13D6.05|SPAC3C7.12|SPCC1682.04|SPBC29A10.07|SPAC23C4.08|SPAC3H8.10|SPAC1786.03
contractile ring (GO:0070938)	0.0978261	0.247721	0.176694	-0.409213	-1.35477	30	SPBP4H10.04|SPAC4A8.05c|SPBC11C11.02|SPBC1778.06c|SPBC23G7.08c|SPBC21D10.12|SPAP8A3.08|SPAC3G9.05|SPCC645.05c|SPAC27F1.02c|SPAC20G8.05c|SPAC4F8.13c|SPCC970.09|SPCC613.04c|SPAC9G1.11c
actin cytoskeleton organization (GO:0030036)	0.0851064	0.22647	0.181383	-0.346358	-1.31847	57	SPCC297.03|SPAC4A8.05c|SPBC11C11.02|SPBC13E7.09|SPBC725.09c|SPAC4F8.10c|SPBC4F6.06|SPBC1778.06c|SPBC23G7.08c|SPBC31F10.07|SPAC25G10.09c|SPAP8A3.08|SPAC3G9.05|SPAC23A1.17|SPCC645.05c|SPAC27F1.02c|SPAC20G8.05c|SPCC794.11c|SPAC4F8.13c|SPCC613.04c|SPCC306.09c
peroxisome (GO:0005777)	0.079661	0.218188	0.206588	-0.537539	-1.43557	13	SPBC17D11.03c|SPCC757.07c|SPBC12C2.08|SPBC725.04|SPBC582.09|SPAC767.01c|SPBC13G1.03c|SPCC11E10.01
spindle pole body (GO:0005816)	0.0785824	0.218188	0.197822	-0.417899	-1.39571	32	SPBC530.14c|SPAC3A12.14|SPBC32F12.04|SPAC1565.06c|SPBC428.13c|SPCC736.14|SPBC2G2.06c|SPBC31F10.07|SPAC823.03|SPBC3H7.15
ubiquitin-like protein transferase activity (GO:0019787)	0.077044	0.218188	0.202072	-0.457119	-1.42373	23	SPBC1105.09|SPAC19A8.05c|SPAC12B10.01c|SPCC338.05c|SPBC21D10.09c|SPCC790.02|SPAC15A10.11
hydrolase activity, acting on ester bonds (GO:0016788)	0.07289	0.212737	0.186433	-0.305624	-1.2897	111	SPAC4D7.02c|SPBP4H10.04|SPBP4G3.02|SPCC417.12|SPBC336.04|SPACUNK4.15|SPAC1952.13|SPCC4B3.04c|SPCC18B5.08c|SPCC31H12.08c|SPBP4H10.17c|SPBC14F5.13c|SPAC1786.01c|SPAC19A8.03|SPBC215.10|SPBC30D10.03c|SPAC4G8.09|SPAC26A3.12c|SPBC119.11c|SPCC126.10|SPAC8C9.05|SPCC16C4.09|SPAC1D4.10|SPBC26H8.11c|SPAC57A7.08|SPAC8E11.04c|SPAC24B11.05|SPAC22H12.03|SPAC823.11
kinetochore (GO:0000776)	0.0731707	0.212737	0.227987	-0.755239	-1.42172	4	SPCC736.14|SPBC776.13|SPBP4H10.06c
prospore membrane (GO:0005628)	0.0693739	0.209456	0.222056	-0.576516	-1.46911	11	SPAC19A8.05c|SPCPJ732.01|SPBC26H8.02c
lyase activity (GO:0016829)	0.0667634	0.206145	0.208955	-0.369548	-1.35507	48	SPAC1039.06|SPBC12C2.12c|SPCC61.03|SPAC22E12.03c|SPAC23A1.14c|SPAC29B12.04|SPBC21H7.07c|SPBP8B7.05c|SPCC320.09|SPCC794.12c|SPAC31G5.15|SPBC19C2.15c|SPAC1A6.10|SPBC23E6.06c|SPBC725.04|SPAC24C9.06c|SPCC1442.09|SPAC17G8.06c|SPAC15E1.04|SPBC1861.05|SPCC11E10.01|SPCC330.05c|SPCC1322.13
protein kinase activity (GO:0004672)	0.0669643	0.206145	0.2114	-0.384245	-1.36837	43	SPCC297.03|SPBC530.14c|SPAC1834.08|SPCC1322.08|SPCC18B5.11c|SPAPB18E9.02c|SPAC1006.09|SPBC4F6.06|SPAC823.03|SPBC3H7.15|SPCC70.05c|SPCC1919.01|SPBC106.10|SPBC216.07c|SPCC16C4.11|SPBC1347.06c|SPCC74.03c|SPAC4G8.05|SPAC23C11.11|SPBC409.07c|SPBC119.08
microtubule binding (GO:0008017)	0.0577617	0.189171	0.252961	-0.672388	-1.51416	7	SPBC12C2.08|SPAPB1A10.09|SPCC736.14|SPAC13D6.05|SPAC3C7.12|SPAC767.01c|SPCC1682.04
motor activity (GO:0003774)	0.0590406	0.189171	0.252961	-0.688241	-1.47813	6	SPAC4A8.05c|SPBC12C2.08|SPCC645.05c|SPAC767.01c
mitochondrion organization (GO:0007005)	0.0539007	0.183965	0.231127	-0.362517	-1.37998	57	SPBC3B9.06c|SPAC7D4.04|SPBC3B9.19|SPAC9E9.15|SPBC11G11.01|SPBC30D10.08|SPBC12C2.08|SPAC17C9.06|SPAC3A12.12|SPBC16C6.02c|SPBC1706.03|SPBC26H8.16|SPBP23A10.16|SPBC1215.01|SPAC24H6.02c|SPAC589.04|SPBC15C4.02|SPAC22A12.08c|SPAC17C9.09c|SPBC24C6.13|SPCC4B3.20
actin cytoskeleton (GO:0015629)	0.0518934	0.18105	0.234393	-0.348192	-1.3684	73	SPBP4H10.04|SPAC3A12.14|SPAC4A8.05c|SPBC11C11.02|SPBC2D10.05|SPBC13E7.09|SPBC12C2.08|SPBC725.09c|SPAC4F8.10c|SPBC9B6.08|SPBC1778.06c|SPBC23G7.08c|SPBC21D10.12|SPBC31F10.07|SPAC25G10.09c|SPAP8A3.08|SPAC3G9.05|SPAC23A1.17|SPCC645.05c|SPAC27F1.02c|SPAC20G8.05c|SPCC794.11c|SPAC4F8.13c|SPCC970.09|SPAC15A10.16|SPCC126.06|SPCC613.04c|SPAC9G1.11c|SPAC767.01c
oxidoreductase activity (GO:0016491)	0.0478469	0.170726	0.224966	-0.29261	-1.3069	179	SPBC354.12|SPCC965.07c;SPCC191.09c|SPBC23G7.10c|SPCC794.01c|SPBC17D11.03c|SPCC1281.07c|SPACUNK4.17|SPBC16A3.02c|SPCC757.07c|SPAC19G12.09|SPAC17A2.05|SPAC26F1.04c|SPCC1450.07c|SPAC1952.08c|SPBC32F12.03c|SPBC354.15|SPBC25D12.04|SPAC521.03|SPBC215.11c|SPBC215.05|SPBP16F5.08c|SPAC9E9.11;SPCC1281.04|SPAC2E1P3.04|SPAC688.04c|SPCC4B3.06c|SPAPB24D3.08c|SPBC337.10c|SPBC1773.17c|SPCC736.13|SPAC1296.02|SPAC…
membrane organization (GO:0061024)	0.0453368	0.165532	0.24134	-0.331002	-1.36266	93	SPAC343.06c|SPAC1952.13|SPBC1685.13|SPAC6F12.03c|SPBC19F8.01c|SPCPJ732.01|SPBP4H10.12|SPBC887.12|SPAC23H4.14|SPBC12C2.08|SPAC23C4.05c|SPAC17C9.06|SPAC1A6.07|SPAC29B12.07|SPAC1142.07c|SPBC16C6.02c|SPBC26H8.02c|SPBC31E1.04|SPBC1711.03|SPBP23A10.16|SPBC4F6.06|SPAC14C4.05c|SPAC589.04|SPAC22A12.08c|SPAC343.09|SPAC17C9.09c|SPAC27F1.02c|SPAC17C9.12|SPAC20G8.05c|SPCC1281.03c|SPCC63.03
carbohydrate metabolic process (GO:0005975)	0.0401662	0.158726	0.266351	-0.365752	-1.41835	63	SPBC354.12|SPCC794.01c|SPAC3C7.05c|SPAC22A12.11|SPBC660.07|SPAC22F8.05|SPBC2D10.05|SPAC513.05|SPBC215.05|SPBC16G5.02c|SPBC1604.05|SPCC4B3.10c|SPAC3A12.18|SPAC25B8.09|SPCPJ732.02c|SPAC2F3.05c
mitotic cytokinesis (GO:0000281)	0.0409712	0.158726	0.276501	-0.440182	-1.49492	34	SPAC4A8.05c|SPBC32F12.04|SPBC11C11.02|SPBC725.09c|SPAC688.07c|SPAC4F8.10c|SPBC4F6.06|SPBC23G7.08c|SPAP8A3.08|SPCC645.05c|SPAC27F1.02c|SPAC20G8.05c|SPAC4F8.13c|SPCC613.04c|SPAC9G1.11c
transmembrane transporter activity (GO:0022857)	0.0414508	0.158726	0.252961	-0.318893	-1.33487	107	SPCC320.05|SPBC887.02|SPCC1183.11|SPAC2F3.08|SPAC5D6.04|SPAC17C9.10|SPAC15A10.01|SPBC1683.03c|SPAC17D4.03c|SPBC12C2.13c|SPAC139.02c|SPAC25H1.10c|SPAC17A2.03c|SPBC29A3.01|SPCC61.01c|SPAC1635.01|SPAC1296.02|SPAC732.01|SPCC1795.02c|SPAC30.04c|SPBC887.17|SPBC9B6.09c|SPBC3B8.04c|SPCC737.09c|SPAC14C4.07|SPAC2G11.09|SPBC530.10c|SPAC1B3.16c|SPAC27F1.08|SPCC965.03|SPAC24B11.09|SPAC1B3.14|SPCC1672.11c|SPAC…
protein catabolic process (GO:0030163)	0.0352076	0.147217	0.321776	-0.325777	-1.38118	114	SPAC1006.01|SPBC1685.05|SPBC1105.09|SPAC19A8.05c|SPCC338.12|SPAC12B10.01c|SPBC21C3.11|SPAC24C9.08|SPAPB1E7.09|SPAC13A11.05|SPAC31A2.04c|SPAC589.10c;SPAC6G10.11c;SPBC337.08c|SPCC1322.05c|SPBC17A3.05c|SPAC1142.07c|SPAC17C9.11c|SPBC21D10.09c|SPAC27F1.03c|SPBC4C3.10c|SPAC13C5.01c|SPAC8E11.04c|SPBC16E9.02c|SPAC15A10.11|SPBC713.02c|SPAC23D3.07|SPAC343.09|SPBC1E8.02|SPAC328.06|SPAC1F3.05|SPAC3A11.08|SPB…
intramembrane lipid transporter activity (GO:0140303)	0.0318747	0.139009	0.321776	-0.795978	-1.49841	4	SPAC343.06c|SPBC887.12
kinase activity (GO:0016301)	0.0282146	0.126563	0.352488	-0.35598	-1.44814	87	SPCC297.03|SPBC530.14c|SPAC1834.08|SPAC22A12.11|SPAC1B1.02c|SPCC14G10.01|SPCC1322.08|SPCC18B5.11c|SPBC16G5.02c|SPCC18.16c|SPAC222.13c|SPAPB18E9.02c|SPAC1006.09|SPCC4B3.10c|SPBC4F6.06|SPCPJ732.02c|SPBC15C4.02|SPAC4G9.09c|SPAC823.03|SPBC3H7.15|SPAPB17E12.14c|SPCC70.05c|SPBC4C3.03|SPCC1919.01|SPAC4A8.07c|SPAC4G9.12|SPBP22H7.06|SPBC106.10|SPCC830.11c|SPBC216.07c|SPCC1672.06c|SPCC16C4.11|SPBC1347.06c|…
autophagy (GO:0006914)	0.0265741	0.12271	0.352488	-0.529454	-1.61435	21	SPAC4A8.04|SPBC3B9.06c|SPAC7D4.04|SPAC23H4.14|SPAC29B12.07|SPBC354.14c|SPAC343.09|SPBC1703.10|SPBC28E12.06c|SPAC17C9.12|SPBC2F12.05c
hydrolase activity, acting on glycosyl bonds (GO:0016798)	0.0264157	0.12271	0.352488	-0.586548	-1.59708	14	SPAC3C7.05c|SPCC757.12|SPBC660.07|SPBC2D10.05|SPAC513.05
DNA-binding transcription factor activity (GO:0003700)	0.0225491	0.110632	0.352488	-0.729841	-1.64354	7	SPBC530.08|SPAC3H8.08c|SPAC11D3.07c|SPBC530.05
organelle localization by membrane tethering (GO:0140056)	0.0196418	0.102792	0.352488	-0.511436	-1.5929	23	SPCP31B10.06|SPAC6F12.03c|SPAC23H4.14|SPBC31E1.04|SPAPYUK71.03c|SPBC354.14c|SPAC824.05|SPAC17C9.12|SPBC1703.15c|SPCC970.09|SPAC29E6.03c|SPBC16G5.05c|SPBC691.05c|SPAC2G11.03c|SPCC962.01
mitotic sister chromatid segregation (GO:0000070)	0.013981	0.0796946	0.38073	-0.561867	-1.63759	18	SPAC31A2.05c|SPAC10F6.09c|SPBC32F12.04|SPAPB1A10.09|SPCC736.14|SPBC776.13|SPBP4H10.06c
peptidase activity (GO:0008233)	0.0106863	0.0645291	0.38073	-0.401683	-1.57219	69	SPCC757.05c|SPAC1006.01|SPAC4A8.04|SPBC1685.05|SPBC18A7.01|SPAC19B12.06c|SPAC3A11.10c|SPBC577.07|SPBC337.07c|SPAC24C9.08|SPAC13A11.05|SPAC31A2.04c|SPCC1322.05c|SPACUNK4.08|SPBC215.03c|SPAC27F1.03c|SPAC4F10.02|SPBC4C3.10c|SPAC56E4.06c|SPAC13C5.01c|SPBC713.02c|SPAC23D3.07|SPAC328.06|SPCC1494.11c;SPBC1E8.04;SPCC1020.14;SPBC9B6.02c;SPBC1289.17;SPAPB15E9.03c;SPAC9.04;SPAC2E1P3.03c;SPAC27E2.08;SPAC26A3…
peroxiredoxin activity (GO:0051920)	0.0071923	0.0451676	0.407018	-0.859366	-1.61774	4	SPBC17D11.03c|SPBC32F12.03c
extracellular region (GO:0005576)	0.00487478	0.0332757	0.407018	-0.75617	-1.77333	8	SPAC1006.01|SPAC4A8.04|SPBP4G3.02|SPBC2D10.05|SPBC337.07c|SPAC821.10c|SPAC1A6.03c
ascospore formation (GO:0030437)	0.00379926	0.0271129	0.431708	-0.624138	-1.78362	17	SPBC19F8.01c|SPAC3A12.14|SPAC19A8.05c|SPBC660.07|SPCPJ732.01|SPBC26H8.02c
catalytic activity, acting on a protein (GO:0140096)	0.00324985	0.0242965	0.431708	-0.335195	-1.51984	200	SPCC757.05c|SPCC297.03|SPBC530.14c|SPAC1006.01|SPAC4A8.04|SPBP4H10.04|SPAC1834.08|SPBC1685.05|SPAC22E12.03c|SPBC1105.09|SPAC19A8.05c|SPBP4H10.17c|SPBC18A7.01|SPAC19B12.06c|SPAC3A11.10c|SPBC577.07|SPAC12B10.01c|SPCC338.05c|SPCC1322.08|SPCC18B5.11c|SPBC337.07c|SPAC24C9.08|SPAPB1E7.09|SPAC13A11.05|SPAC328.04|SPAC31A2.04c|SPBC16D10.07c|SPCC1322.05c|SPACUNK4.08|SPBC215.03c|SPBC21D10.09c|SPAC27F1.03c|S…
plasma membrane (GO:0005886)	0.00187765	0.0147395	0.45506	-0.376443	-1.59598	114	SPCP31B10.06|SPBC365.12c|SPAC343.06c|SPAC18B11.04|SPCC320.05|SPAC3C7.05c|SPBC887.02|SPCC757.12|SPBC1685.13|SPBC4F6.18c|SPAC2F3.08|SPBC11C11.02|SPBC887.12|SPBC1683.03c|SPCC1183.09c|SPAC1142.07c|SPBC17G9.08c|SPBC26H8.02c|SPAC17G8.12|SPCC61.01c|SPBC9B6.08|SPBC887.17|SPAC56E4.06c|SPAC16E8.09|SPBC4F6.06|SPCC1919.03c|SPAPYUK71.03c|SPBC2G2.06c|SPBC23G7.08c|SPAC25G10.09c|SPAC1A6.03c|SPAC2G11.09|SPAC1B3.1…
cell cortex (GO:0005938)	0.00130004	0.0107425	0.45506	-0.382558	-1.64612	128	SPCP31B10.06|SPCC297.03|SPCC1223.06|SPAC13G7.05|SPBP4H10.04|SPBC19F8.01c|SPAC4A8.05c|SPBC25B2.10|SPBC11C11.02|SPBC13E7.09|SPCC1235.10c|SPBC354.13|SPBC12C2.08|SPAPB1A10.09|SPAC6F12.08c|SPAC1A6.07|SPBC725.09c|SPBC428.13c|SPAC6G10.02c|SPAC4F8.10c|SPAC821.03c|SPAC17G8.12|SPBC9B6.08|SPAC16E8.09|SPCC1235.15|SPBC2G2.06c|SPBC1778.06c|SPBC23G7.08c|SPBC21D10.12|SPBC31F10.07|SPAC25G10.09c|SPAP8A3.08|SPAC3G9…
signaling (GO:0023052)	0.00114886	0.0100206	0.45506	-0.38812	-1.65953	125	SPCC297.03|SPBC530.14c|SPBC36.12c|SPAC18B11.04|SPBP4H10.04|SPAC1834.08|SPAC3A12.14|SPCC777.05|SPCC162.12|SPAC19A8.03|SPAC18B11.11|SPCC1322.08|SPCC18B5.11c|SPBC354.13|SPAC1565.06c|SPBC725.09c|SPBC17G9.08c|SPAPB18E9.02c|SPAC1006.09|SPAC57A7.08|SPAC16E8.09|SPBC16E9.02c|SPBC4F6.06|SPCC1919.03c|SPAC458.03|SPAC4F10.04|SPAC823.03|SPBC1703.10|SPBC16A3.09c|SPBC3H7.15|SPBC26H8.05c|SPAC3G9.05|SPAC1556.08c|S…
Golgi apparatus (GO:0005794)	0.000696238	0.00683184	0.477271	-0.381707	-1.67866	153	SPAC23A1.15c|SPCC1281.07c|SPBC16A3.02c|SPAC4A8.04|SPAC25B8.08|SPBC887.02|SPBC1685.13|SPAC6F12.03c|SPBC27B12.08|SPAC630.11|SPBC887.06c|SPBC18A7.01|SPBC4F6.18c|SPCPJ732.01|SPAC23D3.13c|SPAC2F3.08|SPAC19B12.06c|SPBC8D2.02c|SPAC3A11.10c|SPBC887.12|SPBC19G7.14c|SPAPB21F2.02|SPAC3A12.15|SPCC285.14|SPAC17D4.03c|SPBC16C6.02c|SPBC29A3.01|SPAC23H3.06|SPCC1322.09|SPBC31E1.04|SPBC9B6.08|SPBC776.10c|SPBC887.1…
vesicle-mediated transport (GO:0016192)	0.000512618	0.00574865	0.477271	-0.365969	-1.62759	168	SPAC23A1.15c|SPAC6F12.03c|SPAC19A8.05c|SPBC27B12.08|SPAC630.11|SPBC887.06c|SPBC4F6.18c|SPCPJ732.01|SPBC839.02|SPAC4G9.13c|SPAC23D3.13c|SPBC8D2.02c|SPBC887.12|SPBC13E7.09|SPAC23H4.14|SPCC1235.10c|SPAC1952.17c|SPAC6F12.08c|SPBC19G7.14c|SPAPB21F2.02|SPAC3A12.15|SPCC285.14|SPAC29B12.07|SPCC777.13|SPAC1142.07c|SPBC16C6.02c|SPBC26H8.02c|SPAC23H3.06|SPAC17G8.12|SPCC790.02|SPBC31E1.04|SPBC9B6.08|SPBC776.…
molecular adaptor activity (GO:0060090)	0.000179999	0.00217383	0.518848	-0.495777	-1.91975	62	SPCP31B10.06|SPAC23A1.15c|SPCC1223.06|SPAC7D4.04|SPAC6F12.03c|SPBC19F8.01c|SPBC839.02|SPBC19C7.10|SPBC11C11.02|SPBC725.09c|SPAC688.07c|SPBC26H8.02c|SPAC23H3.06|SPBC31E1.04|SPAC144.06|SPBP23A10.16|SPAC20G8.06|SPAC14C4.05c|SPAPYUK71.03c|SPBC2G2.06c|SPBC354.14c|SPBC21D10.12|SPAC3G9.05|SPAC20G4.08|SPAC17C9.12|SPAC20G8.05c|SPCC188.07|SPBC13G1.11
detoxification (GO:0098754)	7.9044e-05	0.00103416	0.538434	-0.528117	-1.97658	53	SPCC965.07c;SPCC191.09c|SPCC757.05c|SPBC17D11.03c|SPCC1281.07c|SPAC11D3.15|SPCC757.07c|SPBC12C2.12c|SPAC22E12.03c|SPBC32F12.03c|SPBP4H10.17c|SPAC1786.01c|SPAC25B8.10|SPAC2E1P3.04|SPCC830.10|SPAC688.04c|SPBC83.16c|SPBP8B7.05c|SPAC821.10c|SPAC56E4.06c|SPCC737.06c|SPAC25B8.09|SPCC737.09c|SPCC1393.13|SPAC22F3.10c|SPAC806.04c
lipid binding (GO:0008289)	7.2187e-05	0.00103031	0.538434	-0.552359	-1.99268	45	SPCP31B10.06|SPBC19F8.01c|SPAC19A8.05c|SPBC887.06c|SPCPJ732.01|SPBC11C11.02|SPCC1450.12|SPBC725.09c|SPAC688.07c|SPBC17G9.08c|SPAC17G8.12|SPAC16E8.09|SPBC14F5.11c|SPAPYUK71.03c|SPBC646.08c|SPBC21D10.12|SPBC28E12.06c|SPCC663.15c|SPBC1271.12|SPAC31G5.15|SPAC20G8.05c|SPBC2F12.05c|SPCC794.11c
cytoplasmic vesicle (GO:0031410)	3.74794e-05	0.000588426	0.557332	-0.444859	-1.86216	107	SPAC4A8.04|SPBC887.02|SPACUNK4.15|SPAC6F12.03c|SPAC19A8.05c|SPBC27B12.08|SPAC630.11|SPBC887.06c|SPCC777.05|SPAC23D3.16|SPCPJ732.01|SPAC4G9.13c|SPBC29A10.17|SPAC23D3.13c|SPAC19B12.06c|SPBC8D2.02c|SPAPB21F2.02|SPAC3A12.15|SPCC285.14|SPCC1322.05c|SPAC29B12.07|SPCC777.13|SPAC1142.07c|SPBC16C6.02c|SPAC23H3.06|SPCC790.02|SPBC31E1.04|SPBC9B6.08|SPAC144.06|SPBC14F5.11c|SPBC2G2.06c|SPCC576.07|SPAC25G10.09…
endosome (GO:0005768)	1.68935e-06	3.78898e-05	0.643552	-0.567061	-2.19578	62	SPAC4A8.04|SPBC887.02|SPAC6F12.03c|SPAC19A8.05c|SPAC630.11|SPBC887.06c|SPCC777.05|SPAC23D3.16|SPCPJ732.01|SPAC4G9.13c|SPBC29A10.17|SPAC23D3.13c|SPBC8D2.02c|SPAPB21F2.02|SPAC3A12.15|SPCC285.14|SPCC1322.05c|SPCC777.13|SPAC1142.07c|SPBC16C6.02c|SPCC790.02|SPBC31E1.04|SPBC9B6.08|SPAC144.06|SPBC14F5.11c|SPAC25G10.09c|SPAC9E9.14|SPAC824.05|SPAC17G6.05c|SPAC31G5.15|SPBC1703.15c|SPAC4A8.07c|SPCC794.11c|S…
vacuole (GO:0005773)	1.24902e-07	3.26826e-06	0.690132	-0.532243	-2.17565	90	SPAC1006.01|SPBC26H8.04c|SPAC4A8.04|SPCC320.05|SPAC7D4.04|SPBC543.04|SPAC19A8.05c|SPAC630.11|SPCC777.05|SPCC338.12|SPBC14F5.13c|SPAC23D3.16|SPBC29A10.17|SPAC2F3.08|SPBC8D2.02c|SPAC513.05|SPAC17C9.10|SPAC23H4.14|SPAC24C9.08|SPCC1183.09c|SPBC12C2.13c|SPCC1322.05c|SPAC17A2.03c|SPAC4F10.02|SPCC61.01c|SPCC790.02|SPBC31E1.04|SPAC732.01|SPCC1795.02c|SPAC30.04c|SPAC57A7.08|SPAC56E4.06c|SPBC354.14c|SPCC73…
Table S11. Gene set enrichment analysis result after ranking by protein repeated-median linear model effect size. pathway: GO-slim term; pval: P-value of enrichment; padj: Benjamini-Hochberg adjusted P-value of enrichment; log2err: expected error based on the P-value’s SD; ES: enrichment score; NES: normalised enrichment score; size: number of genes included in analysis for each GO-slim term; lea…
