# Supplementary material for: Growth-rate-dependent and nutrient-specific gene expression resource allocation in fission yeast
Source: Life Sci Alliance. 2022 Feb 28;5(5):e202101223. doi: 10.26508/lsa.202101223 (PMC8886410; doi:10.26508/lsa.202101223)
Supplement: Supplementary file 15 [file LSA-2021-01223_TableS15.xlsx]

## Sheet: TableS15
gene	annotation
arfA	IET
arfB	IET
bipA	RiBi
cas3	RiBi
dbpA	RiBi
deaD	RiBi
der	RiBi
efp	IET
era	RiBi
fmt	IET
frr	IET
fusA	IET
hflX	IET
hpf	RP
hrpA	RiBi
infA	IET
infB	IET
infC	IET
lepA	IET
obgE	RiBi
prfA	IET
prfB	IET
prfC	IET
prmC	IET
raiA	RP
rbbA	RP
rbfA	RiBi
rdcA	RiBi
rhlE	RiBi
rimJ	RiBi
rimM	RiBi
rimP	RiBi
rlhA	RiBi
rlmA	RiBi
rlmB	RiBi
rlmC	RiBi
rlmD	RiBi
rlmE	RiBi
rlmF	RiBi
rlmG	RiBi
rlmH	RiBi
rlmI	RiBi
rlmJ	RiBi
rlmL	RiBi
rlmM	RiBi
rlmN	RiBi
rluA	RiBi
rluB	RiBi
rluC	RiBi
rluD	RiBi
rluE	RiBi
rluF	RiBi
rnc	RiBi
rne	RiBi
rng	RiBi
rph	RiBi
rplA	RP
rplB	RP
rplC	RP
rplD	RP
rplE	RP
rplF	RP
rplI	RP
rplJ	RP
rplK	RP
rplL	RP
rplM	RP
rplN	RP
rplO	RP
rplP	RP
rplQ	RP
rplR	RP
rplS	RP
rplT	RP
rplU	RP
rplV	RP
rplW	RP
rplX	RP
rplY	RP
rpmA	RP
rpmB	RP
rpmC	RP
rpmD	RP
rpmE	RP
rpmF	RP
rpmG	RP
rpmH	RP
rpmI	RP
rpmJ	RP
rpsA	RP
rpsB	RP
rpsC	RP
rpsD	RP
rpsE	RP
rpsF	RP
rpsG	RP
rpsH	RP
rpsI	RP
rpsJ	RP
rpsK	RP
rpsL	RP
rpsM	RP
rpsN	RP
rpsO	RP
rpsP	RP
rpsQ	RP
rpsR	RP
rpsS	RP
rpsT	RP
rpsU	RP
rrfB	RP
rrfC	RP
rrfD	RP
rrfE	RP
rrfF	RP
rrfG	RP
rrfH	RP
rrlB	RP
rrlC	RP
rrlD	RP
rrlE	RP
rrlG	RP
rrlH	RP
rrsB	RP
rrsC	RP
rrsD	RP
rrsE	RP
rrsG	RP
rrsH	RP
rsfS	RiBi
rsgA	RiBi
rsmA	RiBi
rsmB	RiBi
rsmC	RiBi
rsmD	RiBi
rsmE	RiBi
rsmF	RiBi
rsmG	RiBi
rsmH	RiBi
rsmI	RiBi
rsmJ	RiBi
rsuA	RiBi
selA	IET
selB	IET
smpB	IET
sra	RP
srmB	RiBi
ssrA	IET
suhB	RiBi
truC	RiBi
tsaC	RiBi
tsf	IET
tufA	IET
tufB	IET
uup	RiBi
yafQ	IET
yajL	RiBi
ybeY	RiBi
yceD	RiBi
yciH	IET
yeiP	IET
yhbY	RiBi
yheS	RiBi
yihI	RiBi
ykgM	RP
yqgF	RiBi
Table S15. Assignment of Escherichia coli translation genes to non-overlapping functional classes. gene: gene identifier; annotation: annotation to ribosomal protein, initiation/elongation/termination factors (IET), or ribosome biogenesis (RiBi).
