# Supplementary material for: Growth-rate-dependent and nutrient-specific gene expression resource allocation in fission yeast
Source: Life Sci Alliance. 2022 Feb 28;5(5):e202101223. doi: 10.26508/lsa.202101223 (PMC8886410; doi:10.26508/lsa.202101223)
Supplement: Supplementary file 16 [file LSA-2021-01223_TableS16.xlsx]

## Sheet: TableS16
PomBaseIDs	annotations	class	subclass
SPAC1002.09c	cellular amino acid metabolic process;generation of precursor metabolites and energy;nucleobase-containing small molecule metabolic process;sulfur compound metabolic process	2: Precursors/Energy	Other
SPAC1002.11	lipid metabolic process	4: Lipids	NA
SPAC1002.12c	cellular amino acid metabolic process	3: Amino acids	NA
SPAC1002.13c	carbohydrate metabolic process	6: Other metabolism	NA
SPAC1002.17c	nucleobase-containing small molecule metabolic process	6: Other metabolism	NA
SPAC1002.19	vitamin metabolic process	5: Vitamins	NA
SPAC1006.05c	lipid metabolic process	4: Lipids	NA
SPAC1006.07	translation	0: Translation/RiBi	NA
SPAC1039.01	transmembrane transport	6: Other metabolism	NA
SPAC1039.02	nucleobase-containing small molecule metabolic process	6: Other metabolism	NA
SPAC1039.06	cellular amino acid metabolic process	3: Amino acids	NA
SPAC1039.08	cellular amino acid metabolic process;sulfur compound metabolic process	3: Amino acids	NA
SPAC1039.09	transmembrane transport	6: Other metabolism	NA
SPAC1039.10	cellular amino acid metabolic process	3: Amino acids	NA
SPAC105.01c	transmembrane transport	6: Other metabolism	NA
SPAC1071.02	sulfur compound metabolic process	6: Other metabolism	NA
SPAC1071.05	translation	0: Translation/RiBi	NA
SPAC1071.07c	translation	0: Translation/RiBi	NA
SPAC1071.08	translation	0: Translation/RiBi	NA
SPAC1071.10c	transmembrane transport	6: Other metabolism	NA
SPAC1093.02	vitamin metabolic process	5: Vitamins	NA
SPAC1093.05	translation	0: Translation/RiBi	NA
SPAC10F6.01c	sulfur compound metabolic process	6: Other metabolism	NA
SPAC10F6.03c	nucleobase-containing small molecule metabolic process	6: Other metabolism	NA
SPAC10F6.10	translation	0: Translation/RiBi	NA
SPAC10F6.13c	cellular amino acid metabolic process	3: Amino acids	NA
SPAC10F6.17c	generation of precursor metabolites and energy	2: Precursors/Energy	Other
SPAC110.03	vesicle-mediated transport	6: Other metabolism	NA
SPAC1142.02c	vesicle-mediated transport	6: Other metabolism	NA
SPAC1142.04	translation	0: Translation/RiBi	NA
SPAC1142.07c	vesicle-mediated transport	6: Other metabolism	NA
SPAC11D3.09	cellular amino acid metabolic process	3: Amino acids	NA
SPAC11D3.14c	sulfur compound metabolic process	6: Other metabolism	NA
SPAC11D3.15	sulfur compound metabolic process	6: Other metabolism	NA
SPAC11D3.18c	transmembrane transport	6: Other metabolism	NA
SPAC11E3.02c	vesicle-mediated transport	6: Other metabolism	NA
SPAC11E3.07	transmembrane transport	6: Other metabolism	NA
SPAC11E3.11c	vesicle-mediated transport	6: Other metabolism	NA
SPAC11E3.13c	carbohydrate metabolic process	6: Other metabolism	NA
SPAC11E3.15	translation	0: Translation/RiBi	NA
SPAC11G7.03	generation of precursor metabolites and energy;tricarboxylic acid cycle	2: Precursors/Energy	TCA cycle
SPAC11H11.01	vesicle-mediated transport	6: Other metabolism	NA
SPAC11H11.06	vesicle-mediated transport	6: Other metabolism	NA
SPAC1250.05	translation	0: Translation/RiBi	NA
SPAC1296.01c	nucleobase-containing small molecule metabolic process	6: Other metabolism	NA
SPAC1296.02	generation of precursor metabolites and energy;oxidative phosphorylation	2: Precursors/Energy	OXPHOS
SPAC1296.06	sulfur compound metabolic process	6: Other metabolism	NA
SPAC12B10.02c	vesicle-mediated transport	6: Other metabolism	NA
SPAC12B10.09	transmembrane transport	6: Other metabolism	NA
SPAC12B10.16c	carbohydrate metabolic process	6: Other metabolism	NA
SPAC12G12.02	translation	0: Translation/RiBi	NA
SPAC12G12.04	transmembrane transport	6: Other metabolism	NA
SPAC12G12.06c	translation	0: Translation/RiBi	NA
SPAC12G12.12	transmembrane transport	6: Other metabolism	NA
SPAC139.02c	transmembrane transport	6: Other metabolism	NA
SPAC139.04c	cellular amino acid metabolic process	3: Amino acids	NA
SPAC139.05	cellular amino acid metabolic process	3: Amino acids	NA
SPAC1399.01c	transmembrane transport	6: Other metabolism	NA
SPAC1399.03	transmembrane transport	6: Other metabolism	NA
SPAC13A11.02c	lipid metabolic process	4: Lipids	NA
SPAC13C5.05c	nucleobase-containing small molecule metabolic process	6: Other metabolism	NA
SPAC13F5.03c	carbohydrate metabolic process;generation of precursor metabolites and energy;nucleobase-containing small molecule metabolic process	2: Precursors/Energy	Other
SPAC13F5.04c	vesicle-mediated transport	6: Other metabolism	NA
SPAC13F5.06c	vesicle-mediated transport	6: Other metabolism	NA
SPAC13G6.02c	translation	0: Translation/RiBi	NA
SPAC13G6.03	lipid metabolic process	4: Lipids	NA
SPAC13G6.05c	vesicle-mediated transport	6: Other metabolism	NA
SPAC13G6.06c	cellular amino acid metabolic process	3: Amino acids	NA
SPAC13G6.07c	translation	0: Translation/RiBi	NA
SPAC13G6.09	translation	0: Translation/RiBi	NA
SPAC13G6.10c	carbohydrate metabolic process	6: Other metabolism	NA
SPAC13G6.11c	lipid metabolic process;nucleobase-containing small molecule metabolic process;sulfur compound metabolic process	4: Lipids	NA
SPAC13G6.14	nucleobase-containing small molecule metabolic process	6: Other metabolism	NA
SPAC13G7.01c	lipid metabolic process	4: Lipids	NA
SPAC13G7.04c	vesicle-mediated transport	6: Other metabolism	NA
SPAC13G7.05	lipid metabolic process	4: Lipids	NA
SPAC13G7.06	sulfur compound metabolic process	6: Other metabolism	NA
SPAC13G7.08c	translation	0: Translation/RiBi	NA
SPAC13G7.12c	lipid metabolic process	4: Lipids	NA
SPAC140.01	generation of precursor metabolites and energy;oxidative phosphorylation;tricarboxylic acid cycle	2: Precursors/Energy	OXPHOS
SPAC140.02	translation	0: Translation/RiBi	NA
SPAC144.03	nucleobase-containing small molecule metabolic process	6: Other metabolism	NA
SPAC144.04c	cellular amino acid metabolic process;vitamin metabolic process	3: Amino acids	NA
SPAC144.06	vesicle-mediated transport	6: Other metabolism	NA
SPAC144.08	sulfur compound metabolic process	6: Other metabolism	NA
SPAC144.10c	lipid metabolic process	4: Lipids	NA
SPAC144.12	carbohydrate metabolic process;generation of precursor metabolites and energy	2: Precursors/Energy	Other
SPAC144.15c	vesicle-mediated transport	6: Other metabolism	NA
SPAC144.16	sulfur compound metabolic process	6: Other metabolism	NA
SPAC144.18	transmembrane transport	6: Other metabolism	NA
SPAC1486.05	translation	0: Translation/RiBi	NA
SPAC1486.06	nucleobase-containing small molecule metabolic process	6: Other metabolism	NA
SPAC1486.09	translation	0: Translation/RiBi	NA
SPAC14C4.07	transmembrane transport	6: Other metabolism	NA
SPAC14C4.11	generation of precursor metabolites and energy	2: Precursors/Energy	Other
SPAC14C4.14	generation of precursor metabolites and energy;nucleobase-containing small molecule metabolic process;transmembrane transport;oxidative phosphorylation	2: Precursors/Energy	OXPHOS
SPAC1527.02	vesicle-mediated transport	6: Other metabolism	NA
SPAC1556.02c	generation of precursor metabolites and energy;oxidative phosphorylation;tricarboxylic acid cycle	2: Precursors/Energy	OXPHOS
SPAC1556.04c	nucleobase-containing small molecule metabolic process	6: Other metabolism	NA
SPAC1556.07	nucleobase-containing small molecule metabolic process	6: Other metabolism	NA
SPAC1565.05	translation	0: Translation/RiBi	NA
SPAC15A10.01	sulfur compound metabolic process;transmembrane transport	6: Other metabolism	NA
SPAC15A10.05c	nucleobase-containing small molecule metabolic process	6: Other metabolism	NA
SPAC15A10.06	transmembrane transport	6: Other metabolism	NA
SPAC15A10.12c	vesicle-mediated transport	6: Other metabolism	NA
SPAC15E1.03	translation	0: Translation/RiBi	NA
SPAC15E1.04	nucleobase-containing small molecule metabolic process	6: Other metabolism	NA
SPAC15E1.05c	lipid metabolic process	4: Lipids	NA
SPAC15E1.06	vesicle-mediated transport	6: Other metabolism	NA
SPAC16.03c	nucleobase-containing small molecule metabolic process	6: Other metabolism	NA
SPAC1635.01	transmembrane transport	6: Other metabolism	NA
SPAC1639.01c	lipid metabolic process	4: Lipids	NA
SPAC167.02	vesicle-mediated transport	6: Other metabolism	NA
SPAC167.03c	translation	0: Translation/RiBi	NA
SPAC167.04	transmembrane transport	6: Other metabolism	NA
SPAC167.09	lipid metabolic process	4: Lipids	NA
SPAC1687.06c	translation	0: Translation/RiBi	NA
SPAC1687.11	translation	0: Translation/RiBi	NA
SPAC1687.16c	lipid metabolic process	4: Lipids	NA
SPAC16A10.03c	vesicle-mediated transport	6: Other metabolism	NA
SPAC16C9.02c	cellular amino acid metabolic process;nucleobase-containing small molecule metabolic process;sulfur compound metabolic process	3: Amino acids	NA
SPAC16C9.03	translation	0: Translation/RiBi	NA
SPAC16E8.01	vesicle-mediated transport	6: Other metabolism	NA
SPAC16E8.03	nucleobase-containing small molecule metabolic process	6: Other metabolism	NA
SPAC16E8.04c	cellular amino acid metabolic process	3: Amino acids	NA
SPAC16E8.06c	translation	0: Translation/RiBi	NA
SPAC16E8.07c	transmembrane transport	6: Other metabolism	NA
SPAC16E8.10c	translation	0: Translation/RiBi	NA
SPAC16E8.15	translation	0: Translation/RiBi	NA
SPAC16E8.17c	generation of precursor metabolites and energy;nucleobase-containing small molecule metabolic process;sulfur compound metabolic process;tricarboxylic acid cycle	2: Precursors/Energy	TCA cycle
SPAC1751.03	translation	0: Translation/RiBi	NA
SPAC1751.04	translation	0: Translation/RiBi	NA
SPAC1782.07	generation of precursor metabolites and energy;oxidative phosphorylation	2: Precursors/Energy	OXPHOS
SPAC1782.10c	translation	0: Translation/RiBi	NA
SPAC1782.11	sulfur compound metabolic process	6: Other metabolism	NA
SPAC1783.01	cellular amino acid metabolic process;sulfur compound metabolic process	3: Amino acids	NA
SPAC1783.02c	lipid metabolic process	4: Lipids	NA
SPAC1783.08c	translation	0: Translation/RiBi	NA
SPAC1786.01c	lipid metabolic process	4: Lipids	NA
SPAC1786.02	lipid metabolic process	4: Lipids	NA
SPAC17A2.01	transmembrane transport	6: Other metabolism	NA
SPAC17A2.03c	transmembrane transport	6: Other metabolism	NA
SPAC17A2.05	generation of precursor metabolites and energy;tricarboxylic acid cycle	2: Precursors/Energy	TCA cycle
SPAC17A2.06c	vesicle-mediated transport	6: Other metabolism	NA
SPAC17A2.14	transmembrane transport	6: Other metabolism	NA
SPAC17A5.03;SPAPB8E5.06c	translation	0: Translation/RiBi	NA
SPAC17A5.08	vesicle-mediated transport	6: Other metabolism	NA
SPAC17A5.12	vesicle-mediated transport	6: Other metabolism	NA
SPAC17A5.13	vitamin metabolic process	5: Vitamins	NA
SPAC17A5.15c	cellular amino acid metabolic process	3: Amino acids	NA
SPAC17C9.03	translation	0: Translation/RiBi	NA
SPAC17C9.07	lipid metabolic process	4: Lipids	NA
SPAC17C9.10	transmembrane transport	6: Other metabolism	NA
SPAC17C9.12	lipid metabolic process	4: Lipids	NA
SPAC17D4.01	transmembrane transport	6: Other metabolism	NA
SPAC17D4.03c	transmembrane transport	6: Other metabolism	NA
SPAC17G6.03	nucleobase-containing small molecule metabolic process	6: Other metabolism	NA
SPAC17G6.05c	vesicle-mediated transport	6: Other metabolism	NA
SPAC17G6.06	translation	0: Translation/RiBi	NA
SPAC17G6.07c	vesicle-mediated transport	6: Other metabolism	NA
SPAC17G6.08	vesicle-mediated transport	6: Other metabolism	NA
SPAC17G6.09	transmembrane transport	6: Other metabolism	NA
SPAC17G6.11c	carbohydrate metabolic process;lipid metabolic process	4: Lipids	NA
SPAC17G6.15c	transmembrane transport	6: Other metabolism	NA
SPAC17G8.02	nucleobase-containing small molecule metabolic process	6: Other metabolism	NA
SPAC17G8.04c	vesicle-mediated transport	6: Other metabolism	NA
SPAC17G8.06c	cellular amino acid metabolic process	3: Amino acids	NA
SPAC17G8.08c	transmembrane transport	6: Other metabolism	NA
SPAC17G8.11c	lipid metabolic process	4: Lipids	NA
SPAC17G8.12	vesicle-mediated transport	6: Other metabolism	NA
SPAC17H9.02	translation	0: Translation/RiBi	NA
SPAC17H9.05	translation	0: Translation/RiBi	NA
SPAC17H9.12c	lipid metabolic process	4: Lipids	NA
SPAC17H9.13c	cellular amino acid metabolic process	3: Amino acids	NA
SPAC17H9.16	transmembrane transport	6: Other metabolism	NA
SPAC1805.02c	generation of precursor metabolites and energy	2: Precursors/Energy	Other
SPAC1805.06c	tetrapyrrole metabolic process	6: Other metabolism	NA
SPAC1805.11c	translation	0: Translation/RiBi	NA
SPAC1805.12c;SPAC11G7.04	translation	0: Translation/RiBi	NA
SPAC1805.13	translation	0: Translation/RiBi	NA
SPAC1805.16c	nucleobase-containing small molecule metabolic process	6: Other metabolism	NA
SPAC1805.17	translation	0: Translation/RiBi	NA
SPAC1805.18	translation	0: Translation/RiBi	NA
SPAC1834.01	translation	0: Translation/RiBi	NA
SPAC1834.05	lipid metabolic process	4: Lipids	NA
SPAC1834.07	vesicle-mediated transport	6: Other metabolism	NA
SPAC1834.11c	vesicle-mediated transport	6: Other metabolism	NA
SPAC1851.02	lipid metabolic process	4: Lipids	NA
SPAC18B11.06	translation	0: Translation/RiBi	NA
SPAC18G6.04c	cellular amino acid metabolic process;vitamin metabolic process	3: Amino acids	NA
SPAC18G6.06	translation	0: Translation/RiBi	NA
SPAC18G6.07c	translation	0: Translation/RiBi	NA
SPAC18G6.14c	translation	0: Translation/RiBi	NA
SPAC1952.08c	vitamin metabolic process	5: Vitamins	NA
SPAC1952.09c	lipid metabolic process;nucleobase-containing small molecule metabolic process;sulfur compound metabolic process	4: Lipids	NA
SPAC1952.11c	nitrogen cycle metabolic process	6: Other metabolism	NA
SPAC1952.13	lipid metabolic process	4: Lipids	NA
SPAC1952.17c	vesicle-mediated transport	6: Other metabolism	NA
SPAC19A8.03	lipid metabolic process	4: Lipids	NA
SPAC19A8.04	lipid metabolic process	4: Lipids	NA
SPAC19A8.05c	vesicle-mediated transport	6: Other metabolism	NA
SPAC19A8.07c	translation	0: Translation/RiBi	NA
SPAC19A8.11c	vesicle-mediated transport	6: Other metabolism	NA
SPAC19A8.15	cellular amino acid metabolic process	3: Amino acids	NA
SPAC19B12.02c	carbohydrate metabolic process	6: Other metabolism	NA
SPAC19B12.03	carbohydrate metabolic process	6: Other metabolism	NA
SPAC19B12.10	vesicle-mediated transport	6: Other metabolism	NA
SPAC19B12.11c	translation	0: Translation/RiBi	NA
SPAC19D5.04	translation	0: Translation/RiBi	NA
SPAC19D5.05c	translation	0: Translation/RiBi	NA
SPAC19D5.07	cellular amino acid metabolic process	3: Amino acids	NA
SPAC19E9.01c	translation	0: Translation/RiBi	NA
SPAC19G12.03	carbohydrate metabolic process	6: Other metabolism	NA
SPAC19G12.04	nucleobase-containing small molecule metabolic process	6: Other metabolism	NA
SPAC19G12.05	transmembrane transport	6: Other metabolism	NA
SPAC19G12.08	lipid metabolic process	4: Lipids	NA
SPAC19G12.12	lipid metabolic process	4: Lipids	NA
SPAC19G12.14	lipid metabolic process	4: Lipids	NA
SPAC19G12.15c	carbohydrate metabolic process	6: Other metabolism	NA
SPAC1A6.02	translation	0: Translation/RiBi	NA
SPAC1A6.03c	lipid metabolic process	4: Lipids	NA
SPAC1A6.04c	lipid metabolic process	4: Lipids	NA
SPAC1A6.05c	lipid metabolic process	4: Lipids	NA
SPAC1A6.09c	lipid metabolic process	4: Lipids	NA
SPAC1B1.02c	nucleobase-containing small molecule metabolic process	6: Other metabolism	NA
SPAC1B2.02c	transmembrane transport	6: Other metabolism	NA
SPAC1B2.03c	lipid metabolic process	4: Lipids	NA
SPAC1B2.04	generation of precursor metabolites and energy;oxidative phosphorylation	2: Precursors/Energy	OXPHOS
SPAC1B3.01c	nucleobase-containing small molecule metabolic process	6: Other metabolism	NA
SPAC1B3.07c	vesicle-mediated transport	6: Other metabolism	NA
SPAC1B3.09c	translation	0: Translation/RiBi	NA
SPAC1B3.13	translation	0: Translation/RiBi	NA
SPAC1B3.14	transmembrane transport	6: Other metabolism	NA
SPAC1B3.16c	transmembrane transport	6: Other metabolism	NA
SPAC1B9.03c	translation	0: Translation/RiBi	NA
SPAC1D4.02c	vesicle-mediated transport	6: Other metabolism	NA
SPAC1D4.08	lipid metabolic process	4: Lipids	NA
SPAC1F12.04c	lipid metabolic process	4: Lipids	NA
SPAC1F12.05	vesicle-mediated transport	6: Other metabolism	NA
SPAC1F12.07	cellular amino acid metabolic process	3: Amino acids	NA
SPAC1F12.08	nucleobase-containing small molecule metabolic process	6: Other metabolism	NA
SPAC1F12.09	lipid metabolic process	4: Lipids	NA
SPAC1F12.10c	tetrapyrrole metabolic process	6: Other metabolism	NA
SPAC1F3.01	translation	0: Translation/RiBi	NA
SPAC1F3.03	vesicle-mediated transport	6: Other metabolism	NA
SPAC1F3.04c	translation	0: Translation/RiBi	NA
SPAC1F3.05	vesicle-mediated transport	6: Other metabolism	NA
SPAC1F5.03c	vesicle-mediated transport	6: Other metabolism	NA
SPAC1F5.06	translation	0: Translation/RiBi	NA
SPAC1F5.07c	tetrapyrrole metabolic process	6: Other metabolism	NA
SPAC1F5.10	translation	0: Translation/RiBi	NA
SPAC1F7.02c	translation	0: Translation/RiBi	NA
SPAC1F7.03	transmembrane transport	6: Other metabolism	NA
SPAC1F7.05	nucleobase-containing small molecule metabolic process	6: Other metabolism	NA
SPAC1F7.07c	transmembrane transport	6: Other metabolism	NA
SPAC1F7.09c	nitrogen cycle metabolic process	6: Other metabolism	NA
SPAC1F8.03c	transmembrane transport	6: Other metabolism	NA
SPAC1F8.07c	generation of precursor metabolites and energy	2: Precursors/Energy	Fermentation: Pdc101
SPAC20G4.07c	lipid metabolic process	4: Lipids	NA
SPAC20G8.03	transmembrane transport	6: Other metabolism	NA
SPAC20G8.04c	generation of precursor metabolites and energy	2: Precursors/Energy	Other
SPAC20G8.05c	vesicle-mediated transport	6: Other metabolism	NA
SPAC20G8.07c	lipid metabolic process	4: Lipids	NA
SPAC20G8.09c	translation	0: Translation/RiBi	NA
SPAC20H4.01	translation	0: Translation/RiBi	NA
SPAC20H4.05c	cellular amino acid metabolic process;sulfur compound metabolic process	3: Amino acids	NA
SPAC21E11.04	cellular amino acid metabolic process	3: Amino acids	NA
SPAC21E11.06	translation	0: Translation/RiBi	NA
SPAC21E11.07	sulfur compound metabolic process	6: Other metabolism	NA
SPAC21E11.08	lipid metabolic process	4: Lipids	NA
SPAC222.06	translation	0: Translation/RiBi	NA
SPAC222.08c	vitamin metabolic process	5: Vitamins	NA
SPAC222.11	tetrapyrrole metabolic process	6: Other metabolism	NA
SPAC222.12c	generation of precursor metabolites and energy;nucleobase-containing small molecule metabolic process;transmembrane transport;oxidative phosphorylation	2: Precursors/Energy	OXPHOS
SPAC227.02c	translation	0: Translation/RiBi	NA
SPAC227.06	vesicle-mediated transport	6: Other metabolism	NA
SPAC227.09	cellular amino acid metabolic process	3: Amino acids	NA
SPAC227.13c	sulfur compound metabolic process	6: Other metabolism	NA
SPAC227.14	nucleobase-containing small molecule metabolic process	6: Other metabolism	NA
SPAC227.18	cellular amino acid metabolic process	3: Amino acids	NA
SPAC22A12.08c	lipid metabolic process	4: Lipids	NA
SPAC22A12.10	lipid metabolic process	4: Lipids	NA
SPAC22A12.11	carbohydrate metabolic process	6: Other metabolism	NA
SPAC22A12.12c	translation	0: Translation/RiBi	NA
SPAC22A12.16	lipid metabolic process;nucleobase-containing small molecule metabolic process;sulfur compound metabolic process	4: Lipids	NA
SPAC22E12.01	transmembrane transport	6: Other metabolism	NA
SPAC22E12.03c	nucleobase-containing small molecule metabolic process	6: Other metabolism	NA
SPAC22E12.05c	vesicle-mediated transport	6: Other metabolism	NA
SPAC22E12.10c	generation of precursor metabolites and energy;sulfur compound metabolic process;tetrapyrrole metabolic process	2: Precursors/Energy	Other
SPAC22E12.13c	translation	0: Translation/RiBi	NA
SPAC22E12.17c	vesicle-mediated transport	6: Other metabolism	NA
SPAC22F3.07c	generation of precursor metabolites and energy;nucleobase-containing small molecule metabolic process;transmembrane transport;oxidative phosphorylation	2: Precursors/Energy	OXPHOS
SPAC22F3.08c	translation	0: Translation/RiBi	NA
SPAC22F3.10c	cellular amino acid metabolic process;secondary metabolic process;sulfur compound metabolic process	3: Amino acids	NA
SPAC22F8.02c	carbohydrate metabolic process	6: Other metabolism	NA
SPAC22F8.04	transmembrane transport	6: Other metabolism	NA
SPAC22F8.05	carbohydrate metabolic process	6: Other metabolism	NA
SPAC22F8.08	vesicle-mediated transport	6: Other metabolism	NA
SPAC22F8.09	translation	0: Translation/RiBi	NA
SPAC22F8.11	lipid metabolic process	4: Lipids	NA
SPAC22G7.05	translation	0: Translation/RiBi	NA
SPAC22G7.06c	cellular amino acid metabolic process;nucleobase-containing small molecule metabolic process	3: Amino acids	NA
SPAC22H10.12c	vesicle-mediated transport	6: Other metabolism	NA
SPAC22H12.03	lipid metabolic process	4: Lipids	NA
SPAC22H12.04c	translation	0: Translation/RiBi	NA
SPAC23A1.02c	lipid metabolic process	4: Lipids	NA
SPAC23A1.03	nucleobase-containing small molecule metabolic process	6: Other metabolism	NA
SPAC23A1.05	lipid metabolic process	4: Lipids	NA
SPAC23A1.08c;SPCC1322.15	translation	0: Translation/RiBi	NA
SPAC23A1.11	translation	0: Translation/RiBi	NA
SPAC23A1.12c	cellular amino acid metabolic process	3: Amino acids	NA
SPAC23A1.14c	cellular amino acid metabolic process;sulfur compound metabolic process	3: Amino acids	NA
SPAC23A1.15c	vesicle-mediated transport	6: Other metabolism	NA
SPAC23C11.03	translation	0: Translation/RiBi	NA
SPAC23C11.09	cellular amino acid metabolic process	3: Amino acids	NA
SPAC23C11.13c	nucleobase-containing small molecule metabolic process	6: Other metabolism	NA
SPAC23C11.14	transmembrane transport	6: Other metabolism	NA
SPAC23C4.11	generation of precursor metabolites and energy;nucleobase-containing small molecule metabolic process;transmembrane transport;oxidative phosphorylation	2: Precursors/Energy	OXPHOS
SPAC23C4.12	vesicle-mediated transport	6: Other metabolism	NA
SPAC23C4.13	vesicle-mediated transport	6: Other metabolism	NA
SPAC23C4.14	lipid metabolic process	4: Lipids	NA
SPAC23D3.03c	vesicle-mediated transport	6: Other metabolism	NA
SPAC23D3.04c	carbohydrate metabolic process	6: Other metabolism	NA
SPAC23D3.06c	translation	0: Translation/RiBi	NA
SPAC23D3.10c	carbohydrate metabolic process	6: Other metabolism	NA
SPAC23D3.11	lipid metabolic process	4: Lipids	NA
SPAC23D3.12	transmembrane transport	6: Other metabolism	NA
SPAC23D3.13c	vesicle-mediated transport	6: Other metabolism	NA
SPAC23G3.02c	cellular amino acid metabolic process;secondary metabolic process	3: Amino acids	NA
SPAC23G3.03	secondary metabolic process	6: Other metabolism	NA
SPAC23G3.06	translation	0: Translation/RiBi	NA
SPAC23G3.12c	lipid metabolic process	4: Lipids	NA
SPAC23H3.06	vesicle-mediated transport	6: Other metabolism	NA
SPAC23H3.09c	cellular amino acid metabolic process	3: Amino acids	NA
SPAC23H3.12c	transmembrane transport	6: Other metabolism	NA
SPAC23H3.14	vesicle-mediated transport	6: Other metabolism	NA
SPAC23H4.01c	vesicle-mediated transport	6: Other metabolism	NA
SPAC23H4.03c	vesicle-mediated transport	6: Other metabolism	NA
SPAC23H4.06	cellular amino acid metabolic process	3: Amino acids	NA
SPAC23H4.10c	sulfur compound metabolic process;vitamin metabolic process	5: Vitamins	NA
SPAC23H4.14	vesicle-mediated transport	6: Other metabolism	NA
SPAC23H4.15	translation	0: Translation/RiBi	NA
SPAC24B11.05	nucleobase-containing small molecule metabolic process	6: Other metabolism	NA
SPAC24B11.08c	vesicle-mediated transport	6: Other metabolism	NA
SPAC24B11.09	transmembrane transport	6: Other metabolism	NA
SPAC24B11.13	tetrapyrrole metabolic process	6: Other metabolism	NA
SPAC24C9.03	lipid metabolic process;nucleobase-containing small molecule metabolic process;sulfur compound metabolic process	4: Lipids	NA
SPAC24C9.06c	cellular amino acid metabolic process;generation of precursor metabolites and energy;tricarboxylic acid cycle	2: Precursors/Energy	TCA cycle
SPAC24C9.09	cellular amino acid metabolic process	3: Amino acids	NA
SPAC24C9.11	translation	0: Translation/RiBi	NA
SPAC24C9.12c	cellular amino acid metabolic process;vitamin metabolic process	3: Amino acids	NA
SPAC24C9.16c	generation of precursor metabolites and energy;oxidative phosphorylation	2: Precursors/Energy	OXPHOS
SPAC24H6.01c	lipid metabolic process	4: Lipids	NA
SPAC24H6.02c	transmembrane transport	6: Other metabolism	NA
SPAC24H6.04	carbohydrate metabolic process;generation of precursor metabolites and energy;nucleobase-containing small molecule metabolic process;canonical glycolysis	1: Glycolysis	NA
SPAC24H6.07	translation	0: Translation/RiBi	NA
SPAC24H6.11c	transmembrane transport	6: Other metabolism	NA
SPAC24H6.13	transmembrane transport	6: Other metabolism	NA
SPAC25B8.01	lipid metabolic process	4: Lipids	NA
SPAC25B8.03	lipid metabolic process	4: Lipids	NA
SPAC25B8.06c	cellular amino acid metabolic process	3: Amino acids	NA
SPAC25B8.09	carbohydrate metabolic process	6: Other metabolism	NA
SPAC25B8.16	translation	0: Translation/RiBi	NA
SPAC25G10.05c	cellular amino acid metabolic process	3: Amino acids	NA
SPAC25G10.08	translation	0: Translation/RiBi	NA
SPAC25G10.09c	vesicle-mediated transport	6: Other metabolism	NA
SPAC25H1.08c	translation	0: Translation/RiBi	NA
SPAC25H1.10c	generation of precursor metabolites and energy;nucleobase-containing small molecule metabolic process;transmembrane transport;oxidative phosphorylation	2: Precursors/Energy	OXPHOS
SPAC26A3.05	vesicle-mediated transport	6: Other metabolism	NA
SPAC26A3.06	translation	0: Translation/RiBi	NA
SPAC26A3.11	cellular amino acid metabolic process	3: Amino acids	NA
SPAC26A3.12c	translation	0: Translation/RiBi	NA
SPAC26A3.15c	translation	0: Translation/RiBi	NA
SPAC26A3.17c	translation	0: Translation/RiBi	NA
SPAC26F1.01	vesicle-mediated transport	6: Other metabolism	NA
SPAC26F1.03	nucleobase-containing small molecule metabolic process;sulfur compound metabolic process	6: Other metabolism	NA
SPAC26F1.04c	lipid metabolic process	4: Lipids	NA
SPAC26F1.06	carbohydrate metabolic process;generation of precursor metabolites and energy;nucleobase-containing small molecule metabolic process;canonical glycolysis	1: Glycolysis	NA
SPAC26F1.07	carbohydrate metabolic process	6: Other metabolism	NA
SPAC26F1.09	vesicle-mediated transport	6: Other metabolism	NA
SPAC26F1.13c	cellular amino acid metabolic process	3: Amino acids	NA
SPAC26H5.07c	vesicle-mediated transport	6: Other metabolism	NA
SPAC26H5.08c	carbohydrate metabolic process	6: Other metabolism	NA
SPAC26H5.09c	generation of precursor metabolites and energy	2: Precursors/Energy	Other
SPAC26H5.10c	translation	0: Translation/RiBi	NA
SPAC26H5.13c	lipid metabolic process	4: Lipids	NA
SPAC27D7.02c	vesicle-mediated transport	6: Other metabolism	NA
SPAC27D7.06	generation of precursor metabolites and energy;lipid metabolic process	2: Precursors/Energy	Other
SPAC27E2.06c	cellular amino acid metabolic process	3: Amino acids	NA
SPAC27E2.07	carbohydrate metabolic process;lipid metabolic process	4: Lipids	NA
SPAC27F1.08	transmembrane transport	6: Other metabolism	NA
SPAC29A4.02c	translation	0: Translation/RiBi	NA
SPAC29A4.04c	translation	0: Translation/RiBi	NA
SPAC29A4.09	translation	0: Translation/RiBi	NA
SPAC29A4.15	cellular amino acid metabolic process	3: Amino acids	NA
SPAC29B12.04	cellular amino acid metabolic process;sulfur compound metabolic process;vitamin metabolic process	3: Amino acids	NA
SPAC29B12.07	vesicle-mediated transport	6: Other metabolism	NA
SPAC29B12.10c	transmembrane transport	6: Other metabolism	NA
SPAC29E6.03c	vesicle-mediated transport	6: Other metabolism	NA
SPAC29E6.05c	cellular amino acid metabolic process;sulfur compound metabolic process	3: Amino acids	NA
SPAC29E6.06c	cellular amino acid metabolic process	3: Amino acids	NA
SPAC2C4.05	vesicle-mediated transport	6: Other metabolism	NA
SPAC2C4.09	transmembrane transport	6: Other metabolism	NA
SPAC2C4.11c	translation	0: Translation/RiBi	NA
SPAC2C4.17c	transmembrane transport	6: Other metabolism	NA
SPAC2E1P5.05	translation	0: Translation/RiBi	NA
SPAC2F3.05c	carbohydrate metabolic process	6: Other metabolism	NA
SPAC2F3.08	transmembrane transport	6: Other metabolism	NA
SPAC2F3.09	tetrapyrrole metabolic process	6: Other metabolism	NA
SPAC2F3.10	vesicle-mediated transport	6: Other metabolism	NA
SPAC2F3.11	generation of precursor metabolites and energy	2: Precursors/Energy	Other
SPAC2F3.17c	translation	0: Translation/RiBi	NA
SPAC2F7.05c	translation	0: Translation/RiBi	NA
SPAC2F7.13c	cellular amino acid metabolic process	3: Amino acids	NA
SPAC2F7.14c	translation	0: Translation/RiBi	NA
SPAC2F7.16c	lipid metabolic process	4: Lipids	NA
SPAC2G11.02	translation	0: Translation/RiBi	NA
SPAC2G11.03c	vesicle-mediated transport	6: Other metabolism	NA
SPAC2G11.05c	vesicle-mediated transport	6: Other metabolism	NA
SPAC2G11.06	vesicle-mediated transport	6: Other metabolism	NA
SPAC2G11.09	transmembrane transport	6: Other metabolism	NA
SPAC2G11.11c	translation	0: Translation/RiBi	NA
SPAC30.01c	vesicle-mediated transport	6: Other metabolism	NA
SPAC30.04c	transmembrane transport	6: Other metabolism	NA
SPAC30C2.04	cellular amino acid metabolic process;translation	0: Translation/RiBi	NA
SPAC30C2.05	vesicle-mediated transport	6: Other metabolism	NA
SPAC30D11.01c	carbohydrate metabolic process	6: Other metabolism	NA
SPAC30D11.03	translation	0: Translation/RiBi	NA
SPAC30D11.04c	translation	0: Translation/RiBi	NA
SPAC30D11.12	translation	0: Translation/RiBi	NA
SPAC31A2.02	translation	0: Translation/RiBi	NA
SPAC31A2.03	translation	0: Translation/RiBi	NA
SPAC31A2.07c	translation	0: Translation/RiBi	NA
SPAC31A2.09c	vesicle-mediated transport	6: Other metabolism	NA
SPAC31A2.12	vesicle-mediated transport	6: Other metabolism	NA
SPAC31A2.13c	vesicle-mediated transport	6: Other metabolism	NA
SPAC31G5.03;SPAC144.11	translation	0: Translation/RiBi	NA
SPAC31G5.04	cellular amino acid metabolic process	3: Amino acids	NA
SPAC31G5.05c	carbohydrate metabolic process;generation of precursor metabolites and energy	2: Precursors/Energy	Other
SPAC31G5.08	tetrapyrrole metabolic process	6: Other metabolism	NA
SPAC31G5.14	cellular amino acid metabolic process	3: Amino acids	NA
SPAC31G5.15	lipid metabolic process	4: Lipids	NA
SPAC31G5.16c	lipid metabolic process	4: Lipids	NA
SPAC31G5.17c	translation	0: Translation/RiBi	NA
SPAC323.07c	transmembrane transport	6: Other metabolism	NA
SPAC328.03	carbohydrate metabolic process	6: Other metabolism	NA
SPAC328.09	transmembrane transport	6: Other metabolism	NA
SPAC328.10c	translation	0: Translation/RiBi	NA
SPAC32A11.04c	translation	0: Translation/RiBi	NA
SPAC343.01c	lipid metabolic process;nucleobase-containing small molecule metabolic process;sulfur compound metabolic process	4: Lipids	NA
SPAC343.05	transmembrane transport	6: Other metabolism	NA
SPAC343.10	cellular amino acid metabolic process;sulfur compound metabolic process	3: Amino acids	NA
SPAC343.13	cellular amino acid metabolic process	3: Amino acids	NA
SPAC343.14c	translation	0: Translation/RiBi	NA
SPAC343.16	cellular amino acid metabolic process	3: Amino acids	NA
SPAC343.19	lipid metabolic process	4: Lipids	NA
SPAC3A11.06	vesicle-mediated transport	6: Other metabolism	NA
SPAC3A11.07	generation of precursor metabolites and energy	2: Precursors/Energy	Other
SPAC3A11.09	transmembrane transport	6: Other metabolism	NA
SPAC3A12.04c	translation	0: Translation/RiBi	NA
SPAC3A12.08	nucleobase-containing small molecule metabolic process;sulfur compound metabolic process	6: Other metabolism	NA
SPAC3A12.09c	nitrogen cycle metabolic process	6: Other metabolism	NA
SPAC3A12.10;SPAC26A3.04	translation	0: Translation/RiBi	NA
SPAC3A12.13c	translation	0: Translation/RiBi	NA
SPAC3A12.15	vesicle-mediated transport	6: Other metabolism	NA
SPAC3A12.16c	transmembrane transport	6: Other metabolism	NA
SPAC3A12.17c	cellular amino acid metabolic process;sulfur compound metabolic process	3: Amino acids	NA
SPAC3A12.18	carbohydrate metabolic process;generation of precursor metabolites and energy	2: Precursors/Energy	Other
SPAC3C7.01c	lipid metabolic process	4: Lipids	NA
SPAC3C7.05c	carbohydrate metabolic process	6: Other metabolism	NA
SPAC3C7.10	transmembrane transport	6: Other metabolism	NA
SPAC3C7.13c	carbohydrate metabolic process;generation of precursor metabolites and energy	2: Precursors/Energy	Other
SPAC3F10.03	cellular amino acid metabolic process;nucleobase-containing small molecule metabolic process	3: Amino acids	NA
SPAC3F10.04	secondary metabolic process;sulfur compound metabolic process	6: Other metabolism	NA
SPAC3F10.08c	translation	0: Translation/RiBi	NA
SPAC3F10.09	cellular amino acid metabolic process	3: Amino acids	NA
SPAC3F10.11c	transmembrane transport	6: Other metabolism	NA
SPAC3F10.16c	translation	0: Translation/RiBi	NA
SPAC3F10.17	translation	0: Translation/RiBi	NA
SPAC3F10.19	nucleobase-containing small molecule metabolic process	6: Other metabolism	NA
SPAC3G6.03c	nucleobase-containing small molecule metabolic process	6: Other metabolism	NA
SPAC3G6.04	translation	0: Translation/RiBi	NA
SPAC3G6.09c	carbohydrate metabolic process	6: Other metabolism	NA
SPAC3G9.06	cellular amino acid metabolic process	3: Amino acids	NA
SPAC3G9.09c	translation	0: Translation/RiBi	NA
SPAC3G9.10c	translation	0: Translation/RiBi	NA
SPAC3G9.11c	generation of precursor metabolites and energy	2: Precursors/Energy	Other
SPAC3G9.15c	translation	0: Translation/RiBi	NA
SPAC3G9.16c	vesicle-mediated transport	6: Other metabolism	NA
SPAC3H1.06c;SPAC1399.02	transmembrane transport	6: Other metabolism	NA
SPAC3H1.07	cellular amino acid metabolic process;nitrogen cycle metabolic process	3: Amino acids	NA
SPAC3H1.09c	transmembrane transport	6: Other metabolism	NA
SPAC3H1.10	secondary metabolic process	6: Other metabolism	NA
SPAC3H5.07	translation	0: Translation/RiBi	NA
SPAC3H5.08c	vesicle-mediated transport	6: Other metabolism	NA
SPAC3H5.10	translation	0: Translation/RiBi	NA
SPAC3H5.11	nucleobase-containing small molecule metabolic process	6: Other metabolism	NA
SPAC3H8.06	lipid metabolic process	4: Lipids	NA
SPAC3H8.10	vesicle-mediated transport	6: Other metabolism	NA
SPAC4A8.07c	lipid metabolic process	4: Lipids	NA
SPAC4A8.08c	cellular amino acid metabolic process	3: Amino acids	NA
SPAC4A8.10	lipid metabolic process	4: Lipids	NA
SPAC4A8.11c	lipid metabolic process	4: Lipids	NA
SPAC4A8.14	nucleobase-containing small molecule metabolic process	6: Other metabolism	NA
SPAC4A8.16c	translation	0: Translation/RiBi	NA
SPAC4C5.01	nucleobase-containing small molecule metabolic process	6: Other metabolism	NA
SPAC4C5.02c	vesicle-mediated transport	6: Other metabolism	NA
SPAC4D7.01c	vesicle-mediated transport	6: Other metabolism	NA
SPAC4D7.02c	lipid metabolic process	4: Lipids	NA
SPAC4D7.04c	lipid metabolic process	4: Lipids	NA
SPAC4D7.05	translation	0: Translation/RiBi	NA
SPAC4D7.06c	sulfur compound metabolic process;tetrapyrrole metabolic process	6: Other metabolism	NA
SPAC4D7.08c	nucleobase-containing small molecule metabolic process	6: Other metabolism	NA
SPAC4D7.09	translation	0: Translation/RiBi	NA
SPAC4F10.06	translation	0: Translation/RiBi	NA
SPAC4F10.09c	translation	0: Translation/RiBi	NA
SPAC4F10.13c	vesicle-mediated transport	6: Other metabolism	NA
SPAC4F10.15c	vesicle-mediated transport	6: Other metabolism	NA
SPAC4F10.19c	translation	0: Translation/RiBi	NA
SPAC4F8.01	vesicle-mediated transport	6: Other metabolism	NA
SPAC4F8.03	translation	0: Translation/RiBi	NA
SPAC4F8.04	translation	0: Translation/RiBi	NA
SPAC4F8.07c	carbohydrate metabolic process;generation of precursor metabolites and energy;nucleobase-containing small molecule metabolic process;canonical glycolysis	1: Glycolysis	NA
SPAC4F8.14c	lipid metabolic process;nucleobase-containing small molecule metabolic process;sulfur compound metabolic process	4: Lipids	NA
SPAC4G8.02c	transmembrane transport	6: Other metabolism	NA
SPAC4G8.08	transmembrane transport	6: Other metabolism	NA
SPAC4G8.09	cellular amino acid metabolic process	3: Amino acids	NA
SPAC4G8.10	vesicle-mediated transport	6: Other metabolism	NA
SPAC4G9.03	nucleobase-containing small molecule metabolic process	6: Other metabolism	NA
SPAC4G9.09c	cellular amino acid metabolic process	3: Amino acids	NA
SPAC4G9.10	cellular amino acid metabolic process;nitrogen cycle metabolic process	3: Amino acids	NA
SPAC4G9.12	carbohydrate metabolic process;generation of precursor metabolites and energy;nucleobase-containing small molecule metabolic process	2: Precursors/Energy	Other
SPAC4G9.13c	vesicle-mediated transport	6: Other metabolism	NA
SPAC4G9.15	lipid metabolic process	4: Lipids	NA
SPAC4G9.16c	translation	0: Translation/RiBi	NA
SPAC4G9.20c	transmembrane transport	6: Other metabolism	NA
SPAC4H3.01	transmembrane transport	6: Other metabolism	NA
SPAC4H3.07c	sulfur compound metabolic process	6: Other metabolism	NA
SPAC4H3.08	lipid metabolic process	4: Lipids	NA
SPAC4H3.09	lipid metabolic process;sulfur compound metabolic process	4: Lipids	NA
SPAC4H3.10c	carbohydrate metabolic process;generation of precursor metabolites and energy;nucleobase-containing small molecule metabolic process;canonical glycolysis	1: Glycolysis	NA
SPAC513.05	carbohydrate metabolic process	6: Other metabolism	NA
SPAC513.06c	carbohydrate metabolic process	6: Other metabolism	NA
SPAC521.04c	transmembrane transport	6: Other metabolism	NA
SPAC521.05;SPAC2C4.16c	translation	0: Translation/RiBi	NA
SPAC56E4.02c	lipid metabolic process	4: Lipids	NA
SPAC56E4.03	cellular amino acid metabolic process	3: Amino acids	NA
SPAC56E4.04c	lipid metabolic process;nucleobase-containing small molecule metabolic process;sulfur compound metabolic process	4: Lipids	NA
SPAC56E4.06c	sulfur compound metabolic process	6: Other metabolism	NA
SPAC56F8.02	nucleobase-containing small molecule metabolic process;sulfur compound metabolic process	6: Other metabolism	NA
SPAC56F8.03	translation	0: Translation/RiBi	NA
SPAC56F8.04c	lipid metabolic process	4: Lipids	NA
SPAC56F8.05c	vesicle-mediated transport	6: Other metabolism	NA
SPAC56F8.09	translation	0: Translation/RiBi	NA
SPAC56F8.10	cellular amino acid metabolic process;sulfur compound metabolic process	3: Amino acids	NA
SPAC57A10.05c	vesicle-mediated transport	6: Other metabolism	NA
SPAC57A10.11c	transmembrane transport	6: Other metabolism	NA
SPAC57A10.12c	nucleobase-containing small molecule metabolic process	6: Other metabolism	NA
SPAC57A7.05	transmembrane transport	6: Other metabolism	NA
SPAC57A7.06	translation	0: Translation/RiBi	NA
SPAC57A7.07c	cellular amino acid metabolic process;sulfur compound metabolic process	3: Amino acids	NA
SPAC57A7.10c	vesicle-mediated transport	6: Other metabolism	NA
SPAC589.03c	translation	0: Translation/RiBi	NA
SPAC589.12	lipid metabolic process	4: Lipids	NA
SPAC5D6.01;SPAC22A12.04c	translation	0: Translation/RiBi	NA
SPAC5D6.04	transmembrane transport	6: Other metabolism	NA
SPAC5D6.06c	lipid metabolic process	4: Lipids	NA
SPAC5D6.07c	vesicle-mediated transport	6: Other metabolism	NA
SPAC5D6.13	vesicle-mediated transport	6: Other metabolism	NA
SPAC5H10.01	cellular amino acid metabolic process	3: Amino acids	NA
SPAC5H10.06c	generation of precursor metabolites and energy	2: Precursors/Energy	Other
SPAC5H10.08c	vitamin metabolic process	5: Vitamins	NA
SPAC5H10.09c	vitamin metabolic process	5: Vitamins	NA
SPAC607.03c	translation	0: Translation/RiBi	NA
SPAC607.08c	vesicle-mediated transport	6: Other metabolism	NA
SPAC607.09c	transmembrane transport	6: Other metabolism	NA
SPAC630.03	vesicle-mediated transport	6: Other metabolism	NA
SPAC630.05	vesicle-mediated transport	6: Other metabolism	NA
SPAC630.08c	lipid metabolic process	4: Lipids	NA
SPAC630.11	vesicle-mediated transport	6: Other metabolism	NA
SPAC630.12	lipid metabolic process	4: Lipids	NA
SPAC637.04	vesicle-mediated transport	6: Other metabolism	NA
SPAC637.05c	transmembrane transport	6: Other metabolism	NA
SPAC637.07	translation	0: Translation/RiBi	NA
SPAC637.08	sulfur compound metabolic process	6: Other metabolism	NA
SPAC637.09	translation	0: Translation/RiBi	NA
SPAC644.05c	nucleobase-containing small molecule metabolic process	6: Other metabolism	NA
SPAC644.08	cellular amino acid metabolic process;sulfur compound metabolic process	3: Amino acids	NA
SPAC644.09	vitamin metabolic process	5: Vitamins	NA
SPAC644.11c	nucleobase-containing small molecule metabolic process;sulfur compound metabolic process	6: Other metabolism	NA
SPAC644.13c	vesicle-mediated transport	6: Other metabolism	NA
SPAC644.15	translation	0: Translation/RiBi	NA
SPAC644.18c	vesicle-mediated transport	6: Other metabolism	NA
SPAC664.05	translation	0: Translation/RiBi	NA
SPAC664.06	translation	0: Translation/RiBi	NA
SPAC664.08c	translation	0: Translation/RiBi	NA
SPAC664.09	sulfur compound metabolic process	6: Other metabolism	NA
SPAC664.11	sulfur compound metabolic process;transmembrane transport	6: Other metabolism	NA
SPAC664.14	transmembrane transport	6: Other metabolism	NA
SPAC688.11	vesicle-mediated transport	6: Other metabolism	NA
SPAC694.03	nucleobase-containing small molecule metabolic process	6: Other metabolism	NA
SPAC6B12.04c	cellular amino acid metabolic process	3: Amino acids	NA
SPAC6B12.12	transmembrane transport	6: Other metabolism	NA
SPAC6B12.19	translation	0: Translation/RiBi	NA
SPAC6C3.04	generation of precursor metabolites and energy;tricarboxylic acid cycle	2: Precursors/Energy	TCA cycle
SPAC6C3.06c	vesicle-mediated transport	6: Other metabolism	NA
SPAC6C3.09	translation	0: Translation/RiBi	NA
SPAC6F12.03c	vesicle-mediated transport	6: Other metabolism	NA
SPAC6F12.04	vesicle-mediated transport	6: Other metabolism	NA
SPAC6F12.05c	sulfur compound metabolic process;vitamin metabolic process	5: Vitamins	NA
SPAC6F12.07	transmembrane transport	6: Other metabolism	NA
SPAC6F12.08c	vesicle-mediated transport	6: Other metabolism	NA
SPAC6F12.10c	nucleobase-containing small molecule metabolic process	6: Other metabolism	NA
SPAC6F12.13c	lipid metabolic process	4: Lipids	NA
SPAC6F12.16c	translation	0: Translation/RiBi	NA
SPAC6F6.03c	translation	0: Translation/RiBi	NA
SPAC6F6.07c	translation	0: Translation/RiBi	NA
SPAC6F6.10c	vesicle-mediated transport	6: Other metabolism	NA
SPAC6F6.11c	vitamin metabolic process	5: Vitamins	NA
SPAC6F6.12	vesicle-mediated transport	6: Other metabolism	NA
SPAC6F6.15	vesicle-mediated transport	6: Other metabolism	NA
SPAC6G10.03c	lipid metabolic process	4: Lipids	NA
SPAC6G10.05c	vesicle-mediated transport	6: Other metabolism	NA
SPAC6G10.08	generation of precursor metabolites and energy;tricarboxylic acid cycle	2: Precursors/Energy	TCA cycle
SPAC6G10.09	carbohydrate metabolic process	6: Other metabolism	NA
SPAC6G10.11c;SPAC589.10c;SPBC337.08c	translation	0: Translation/RiBi	NA
SPAC6G9.02c	translation	0: Translation/RiBi	NA
SPAC6G9.07c	vesicle-mediated transport	6: Other metabolism	NA
SPAC6G9.11	vesicle-mediated transport	6: Other metabolism	NA
SPAC6G9.12	carbohydrate metabolic process;vesicle-mediated transport	6: Other metabolism	NA
SPAC732.01	transmembrane transport	6: Other metabolism	NA
SPAC732.02c	carbohydrate metabolic process	6: Other metabolism	NA
SPAC767.01c	vesicle-mediated transport	6: Other metabolism	NA
SPAC7D4.06c	lipid metabolic process	4: Lipids	NA
SPAC7D4.07c	cellular amino acid metabolic process;sulfur compound metabolic process	3: Amino acids	NA
SPAC7D4.10	transmembrane transport	6: Other metabolism	NA
SPAC7D4.11c	vesicle-mediated transport	6: Other metabolism	NA
SPAC806.02c	sulfur compound metabolic process	6: Other metabolism	NA
SPAC806.03c	translation	0: Translation/RiBi	NA
SPAC806.06c	nucleobase-containing small molecule metabolic process	6: Other metabolism	NA
SPAC806.07	nucleobase-containing small molecule metabolic process	6: Other metabolism	NA
SPAC821.05	translation	0: Translation/RiBi	NA
SPAC821.09	carbohydrate metabolic process	6: Other metabolism	NA
SPAC821.11	cellular amino acid metabolic process	3: Amino acids	NA
SPAC823.05c	vesicle-mediated transport	6: Other metabolism	NA
SPAC823.08c	translation	0: Translation/RiBi	NA
SPAC823.10c	transmembrane transport	6: Other metabolism	NA
SPAC823.11	lipid metabolic process	4: Lipids	NA
SPAC823.12	vesicle-mediated transport	6: Other metabolism	NA
SPAC823.17	transmembrane transport	6: Other metabolism	NA
SPAC824.05	vesicle-mediated transport	6: Other metabolism	NA
SPAC824.06	transmembrane transport	6: Other metabolism	NA
SPAC824.08	nucleobase-containing small molecule metabolic process	6: Other metabolism	NA
SPAC824.09c	vesicle-mediated transport	6: Other metabolism	NA
SPAC869.03c	transmembrane transport	6: Other metabolism	NA
SPAC869.05c	transmembrane transport	6: Other metabolism	NA
SPAC869.10c	transmembrane transport	6: Other metabolism	NA
SPAC869.11;SPBC359.01	transmembrane transport	6: Other metabolism	NA
SPAC890.04c	translation	0: Translation/RiBi	NA
SPAC890.06	translation	0: Translation/RiBi	NA
SPAC890.08	translation	0: Translation/RiBi	NA
SPAC8C9.08	translation	0: Translation/RiBi	NA
SPAC8C9.10c	translation	0: Translation/RiBi	NA
SPAC8C9.12c	transmembrane transport	6: Other metabolism	NA
SPAC8C9.15c	translation	0: Translation/RiBi	NA
SPAC8E11.01c	carbohydrate metabolic process	6: Other metabolism	NA
SPAC8E11.10	carbohydrate metabolic process	6: Other metabolism	NA
SPAC8F11.04	translation	0: Translation/RiBi	NA
SPAC8F11.09c	vitamin metabolic process	5: Vitamins	NA
SPAC8F11.10c	carbohydrate metabolic process	6: Other metabolism	NA
SPAC9.06c	cellular amino acid metabolic process;sulfur compound metabolic process	3: Amino acids	NA
SPAC9.08c	lipid metabolic process	4: Lipids	NA
SPAC9.09	cellular amino acid metabolic process;nucleobase-containing small molecule metabolic process;sulfur compound metabolic process	3: Amino acids	NA
SPAC9.10	transmembrane transport	6: Other metabolism	NA
SPAC922.03	nitrogen cycle metabolic process	6: Other metabolism	NA
SPAC922.07c	cellular amino acid metabolic process	3: Amino acids	NA
SPAC926.08c	translation	0: Translation/RiBi	NA
SPAC926.09c	lipid metabolic process	4: Lipids	NA
SPAC959.02	vesicle-mediated transport	6: Other metabolism	NA
SPAC959.03c	translation	0: Translation/RiBi	NA
SPAC959.07	translation	0: Translation/RiBi	NA
SPAC959.08	translation	0: Translation/RiBi	NA
SPAC977.12	cellular amino acid metabolic process	3: Amino acids	NA
SPAC977.14c;SPAC750.01	transmembrane transport	6: Other metabolism	NA
SPAC977.16c	carbohydrate metabolic process	6: Other metabolism	NA
SPAC9E9.03	cellular amino acid metabolic process	3: Amino acids	NA
SPAC9E9.04	vesicle-mediated transport	6: Other metabolism	NA
SPAC9E9.06c	cellular amino acid metabolic process	3: Amino acids	NA
SPAC9E9.07c	vesicle-mediated transport	6: Other metabolism	NA
SPAC9E9.09c	generation of precursor metabolites and energy	2: Precursors/Energy	Other
SPAC9E9.11	vitamin metabolic process	5: Vitamins	NA
SPAC9E9.14	vesicle-mediated transport	6: Other metabolism	NA
SPAC9G1.03c	translation	0: Translation/RiBi	NA
SPAC9G1.10c	carbohydrate metabolic process;lipid metabolic process	4: Lipids	NA
SPACUNK4.07c	transmembrane transport	6: Other metabolism	NA
SPACUNK4.10	generation of precursor metabolites and energy	2: Precursors/Energy	Other
SPACUNK4.11c	translation	0: Translation/RiBi	NA
SPACUNK4.15	nucleobase-containing small molecule metabolic process	6: Other metabolism	NA
SPACUNK4.16c	carbohydrate metabolic process	6: Other metabolism	NA
SPAP14E8.03	vesicle-mediated transport	6: Other metabolism	NA
SPAP27G11.03	translation	0: Translation/RiBi	NA
SPAP27G11.06c	vesicle-mediated transport	6: Other metabolism	NA
SPAP27G11.09c	generation of precursor metabolites and energy;vitamin metabolic process	2: Precursors/Energy	Other
SPAP27G11.13c	translation	0: Translation/RiBi	NA
SPAP32A8.02	carbohydrate metabolic process	6: Other metabolism	NA
SPAP7G5.02c	cellular amino acid metabolic process;nucleobase-containing small molecule metabolic process	3: Amino acids	NA
SPAP7G5.04c	cellular amino acid metabolic process	3: Amino acids	NA
SPAP7G5.05	translation	0: Translation/RiBi	NA
SPAP7G5.06	transmembrane transport	6: Other metabolism	NA
SPAP8A3.03	transmembrane transport	6: Other metabolism	NA
SPAPB17E12.03	transmembrane transport	6: Other metabolism	NA
SPAPB17E12.13	translation	0: Translation/RiBi	NA
SPAPB1A10.03	translation	0: Translation/RiBi	NA
SPAPB1A10.06c	translation	0: Translation/RiBi	NA
SPAPB1A10.07c	lipid metabolic process	4: Lipids	NA
SPAPB1A10.10c	vesicle-mediated transport	6: Other metabolism	NA
SPAPB1A10.11c	cellular amino acid metabolic process	3: Amino acids	NA
SPAPB1E7.05	lipid metabolic process	4: Lipids	NA
SPAPB1E7.07	cellular amino acid metabolic process	3: Amino acids	NA
SPAPB1E7.12	translation	0: Translation/RiBi	NA
SPAPB21F2.02	vesicle-mediated transport	6: Other metabolism	NA
SPAPB21F2.03	translation	0: Translation/RiBi	NA
SPAPB2B4.01c	lipid metabolic process	4: Lipids	NA
SPAPB2B4.02	sulfur compound metabolic process	6: Other metabolism	NA
SPAPB2B4.04c	transmembrane transport	6: Other metabolism	NA
SPAPB2B4.05	transmembrane transport	6: Other metabolism	NA
SPAPB2B4.06	lipid metabolic process	4: Lipids	NA
SPAPB8E5.03	transmembrane transport	6: Other metabolism	NA
SPAPB8E5.07c	translation	0: Translation/RiBi	NA
SPAPJ696.01c	vesicle-mediated transport	6: Other metabolism	NA
SPAPJ696.02	vesicle-mediated transport	6: Other metabolism	NA
SPAPJ698.02c	translation	0: Translation/RiBi	NA
SPAPYUG7.05	cellular amino acid metabolic process	3: Amino acids	NA
SPBC106.04	nucleobase-containing small molecule metabolic process	6: Other metabolism	NA
SPBC106.05c	generation of precursor metabolites and energy;nucleobase-containing small molecule metabolic process;transmembrane transport;oxidative phosphorylation	2: Precursors/Energy	OXPHOS
SPBC106.11c	lipid metabolic process	4: Lipids	NA
SPBC106.14c	translation	0: Translation/RiBi	NA
SPBC106.15	lipid metabolic process	4: Lipids	NA
SPBC106.17c	cellular amino acid metabolic process;lipid metabolic process;sulfur compound metabolic process	3: Amino acids	NA
SPBC106.18	translation	0: Translation/RiBi	NA
SPBC106.20	vesicle-mediated transport	6: Other metabolism	NA
SPBC1105.01	translation	0: Translation/RiBi	NA
SPBC1105.02c	cellular amino acid metabolic process	3: Amino acids	NA
SPBC1105.05	carbohydrate metabolic process	6: Other metabolism	NA
SPBC1105.08	vesicle-mediated transport	6: Other metabolism	NA
SPBC115.01c	translation	0: Translation/RiBi	NA
SPBC115.03	generation of precursor metabolites and energy	2: Precursors/Energy	Other
SPBC119.07	vesicle-mediated transport	6: Other metabolism	NA
SPBC119.10	cellular amino acid metabolic process	3: Amino acids	NA
SPBC119.11c	translation	0: Translation/RiBi	NA
SPBC119.12	vesicle-mediated transport	6: Other metabolism	NA
SPBC1198.02	nucleobase-containing small molecule metabolic process	6: Other metabolism	NA
SPBC1198.05	nucleobase-containing small molecule metabolic process	6: Other metabolism	NA
SPBC1198.06c	carbohydrate metabolic process	6: Other metabolism	NA
SPBC1198.07c	carbohydrate metabolic process	6: Other metabolism	NA
SPBC1198.08	sulfur compound metabolic process	6: Other metabolism	NA
SPBC1198.14c	carbohydrate metabolic process	6: Other metabolism	NA
SPBC11B10.01	lipid metabolic process	4: Lipids	NA
SPBC11B10.02c	cellular amino acid metabolic process	3: Amino acids	NA
SPBC11B10.03	vesicle-mediated transport	6: Other metabolism	NA
SPBC11C11.07	translation	0: Translation/RiBi	NA
SPBC11C11.09c;SPAC3H5.12c	translation	0: Translation/RiBi	NA
SPBC11G11.02c	vesicle-mediated transport	6: Other metabolism	NA
SPBC11G11.03	translation	0: Translation/RiBi	NA
SPBC11G11.04	vesicle-mediated transport	6: Other metabolism	NA
SPBC1271.09	transmembrane transport	6: Other metabolism	NA
SPBC1271.12	lipid metabolic process	4: Lipids	NA
SPBC1271.14	cellular amino acid metabolic process	3: Amino acids	NA
SPBC1289.01c	carbohydrate metabolic process	6: Other metabolism	NA
SPBC1289.03c	translation	0: Translation/RiBi	NA
SPBC1289.04c	vesicle-mediated transport	6: Other metabolism	NA
SPBC1289.05c	transmembrane transport	6: Other metabolism	NA
SPBC1289.08	nucleobase-containing small molecule metabolic process	6: Other metabolism	NA
SPBC1289.09	transmembrane transport	6: Other metabolism	NA
SPBC1289.16c	nitrogen cycle metabolic process	6: Other metabolism	NA
SPBC12C2.03c	cellular amino acid metabolic process;sulfur compound metabolic process	3: Amino acids	NA
SPBC12C2.05c	vesicle-mediated transport	6: Other metabolism	NA
SPBC12C2.06	translation	0: Translation/RiBi	NA
SPBC12C2.07c	vitamin metabolic process	5: Vitamins	NA
SPBC12C2.11	nucleobase-containing small molecule metabolic process	6: Other metabolism	NA
SPBC12C2.12c	sulfur compound metabolic process	6: Other metabolism	NA
SPBC12C2.13c	transmembrane transport	6: Other metabolism	NA
SPBC12D12.05c	transmembrane transport	6: Other metabolism	NA
SPBC1347.04	lipid metabolic process	4: Lipids	NA
SPBC1347.07	translation	0: Translation/RiBi	NA
SPBC13A2.02;REV__SPAC323.05c	translation	0: Translation/RiBi	NA
SPBC13A2.03	lipid metabolic process	4: Lipids	NA
SPBC13A2.04c	transmembrane transport	6: Other metabolism	NA
SPBC13E7.04	generation of precursor metabolites and energy;nucleobase-containing small molecule metabolic process;transmembrane transport;oxidative phosphorylation	2: Precursors/Energy	OXPHOS
SPBC13E7.05	lipid metabolic process	4: Lipids	NA
SPBC13E7.09	vesicle-mediated transport	6: Other metabolism	NA
SPBC13G1.02	nucleobase-containing small molecule metabolic process	6: Other metabolism	NA
SPBC13G1.03c	transmembrane transport	6: Other metabolism	NA
SPBC13G1.06c	sulfur compound metabolic process	6: Other metabolism	NA
SPBC13G1.09	translation	0: Translation/RiBi	NA
SPBC13G1.11	vesicle-mediated transport	6: Other metabolism	NA
SPBC146.08c	translation	0: Translation/RiBi	NA
SPBC146.13c	vesicle-mediated transport	6: Other metabolism	NA
SPBC146.14c	vesicle-mediated transport	6: Other metabolism	NA
SPBC14C8.02	transmembrane transport	6: Other metabolism	NA
SPBC14C8.04	cellular amino acid metabolic process	3: Amino acids	NA
SPBC14C8.06	vesicle-mediated transport	6: Other metabolism	NA
SPBC14C8.14c	translation	0: Translation/RiBi	NA
SPBC14C8.15	lipid metabolic process	4: Lipids	NA
SPBC14F5.02	vesicle-mediated transport	6: Other metabolism	NA
SPBC14F5.04c	carbohydrate metabolic process;generation of precursor metabolites and energy;nucleobase-containing small molecule metabolic process;canonical glycolysis	1: Glycolysis	NA
SPBC14F5.05c	cellular amino acid metabolic process;sulfur compound metabolic process	3: Amino acids	NA
SPBC14F5.06	translation	0: Translation/RiBi	NA
SPBC14F5.09c	nucleobase-containing small molecule metabolic process	6: Other metabolism	NA
SPBC14F5.11c	vesicle-mediated transport	6: Other metabolism	NA
SPBC14F5.13c	nucleobase-containing small molecule metabolic process	6: Other metabolism	NA
SPBC1539.03c	cellular amino acid metabolic process;nitrogen cycle metabolic process	3: Amino acids	NA
SPBC1539.05	vesicle-mediated transport	6: Other metabolism	NA
SPBC1539.06	lipid metabolic process	4: Lipids	NA
SPBC1539.07c	generation of precursor metabolites and energy	2: Precursors/Energy	Other
SPBC1539.08	vesicle-mediated transport	6: Other metabolism	NA
SPBC1539.09c	cellular amino acid metabolic process	3: Amino acids	NA
SPBC1539.10	translation	0: Translation/RiBi	NA
SPBC15C4.03	vesicle-mediated transport	6: Other metabolism	NA
SPBC15C4.04c	transmembrane transport	6: Other metabolism	NA
SPBC15C4.05	translation	0: Translation/RiBi	NA
SPBC15D4.04	lipid metabolic process	4: Lipids	NA
SPBC15D4.09c	cellular amino acid metabolic process;sulfur compound metabolic process	3: Amino acids	NA
SPBC1604.01	cellular amino acid metabolic process;sulfur compound metabolic process	3: Amino acids	NA
SPBC1604.04	transmembrane transport	6: Other metabolism	NA
SPBC1604.05	carbohydrate metabolic process;generation of precursor metabolites and energy;nucleobase-containing small molecule metabolic process;canonical glycolysis	1: Glycolysis	NA
SPBC1604.06c	translation	0: Translation/RiBi	NA
SPBC1604.07	generation of precursor metabolites and energy;nucleobase-containing small molecule metabolic process;transmembrane transport;oxidative phosphorylation	2: Precursors/Energy	OXPHOS
SPBC1604.09c	translation	0: Translation/RiBi	NA
SPBC1604.11	generation of precursor metabolites and energy;nucleobase-containing small molecule metabolic process;transmembrane transport;oxidative phosphorylation	2: Precursors/Energy	OXPHOS
SPBC1604.15	lipid metabolic process	4: Lipids	NA
SPBC1604.18c	vesicle-mediated transport	6: Other metabolism	NA
SPBC1652.02	transmembrane transport	6: Other metabolism	NA
SPBC1677.03c	cellular amino acid metabolic process	3: Amino acids	NA
SPBC1683.01	transmembrane transport	6: Other metabolism	NA
SPBC1683.02	nucleobase-containing small molecule metabolic process	6: Other metabolism	NA
SPBC1683.03c	transmembrane transport	6: Other metabolism	NA
SPBC1683.04	carbohydrate metabolic process	6: Other metabolism	NA
SPBC1683.05	transmembrane transport	6: Other metabolism	NA
SPBC1683.06c	nucleobase-containing small molecule metabolic process	6: Other metabolism	NA
SPBC1683.09c	transmembrane transport	6: Other metabolism	NA
SPBC1683.10c	transmembrane transport	6: Other metabolism	NA
SPBC1683.11c	cellular amino acid metabolic process	3: Amino acids	NA
SPBC1683.12	transmembrane transport	6: Other metabolism	NA
SPBC1685.02c	translation	0: Translation/RiBi	NA
SPBC1685.09	translation	0: Translation/RiBi	NA
SPBC1685.10	translation	0: Translation/RiBi	NA
SPBC16A3.05c	translation	0: Translation/RiBi	NA
SPBC16A3.10	lipid metabolic process	4: Lipids	NA
SPBC16A3.12c	lipid metabolic process	4: Lipids	NA
SPBC16A3.17c	transmembrane transport	6: Other metabolism	NA
SPBC16C6.02c	vesicle-mediated transport	6: Other metabolism	NA
SPBC16C6.05	translation	0: Translation/RiBi	NA
SPBC16C6.06	vesicle-mediated transport	6: Other metabolism	NA
SPBC16C6.08c	generation of precursor metabolites and energy;oxidative phosphorylation	2: Precursors/Energy	OXPHOS
SPBC16C6.11	translation	0: Translation/RiBi	NA
SPBC16C6.12c	translation	0: Translation/RiBi	NA
SPBC16C6.13c	vesicle-mediated transport	6: Other metabolism	NA
SPBC16D10.06	transmembrane transport	6: Other metabolism	NA
SPBC16E9.05	lipid metabolic process	4: Lipids	NA
SPBC16E9.09c	vesicle-mediated transport	6: Other metabolism	NA
SPBC16E9.10c	translation	0: Translation/RiBi	NA
SPBC16E9.14c	transmembrane transport	6: Other metabolism	NA
SPBC16E9.16c	lipid metabolic process	4: Lipids	NA
SPBC16E9.18	lipid metabolic process	4: Lipids	NA
SPBC16G5.02c	carbohydrate metabolic process	6: Other metabolism	NA
SPBC16G5.08	cellular amino acid metabolic process	3: Amino acids	NA
SPBC16G5.10	translation	0: Translation/RiBi	NA
SPBC16G5.14c	translation	0: Translation/RiBi	NA
SPBC16H5.02	carbohydrate metabolic process;generation of precursor metabolites and energy;nucleobase-containing small molecule metabolic process;canonical glycolysis	1: Glycolysis	NA
SPBC16H5.06	generation of precursor metabolites and energy;oxidative phosphorylation	2: Precursors/Energy	OXPHOS
SPBC16H5.08c	translation	0: Translation/RiBi	NA
SPBC16H5.10c	translation	0: Translation/RiBi	NA
SPBC1703.03c	translation	0: Translation/RiBi	NA
SPBC1703.05	translation	0: Translation/RiBi	NA
SPBC1703.07	generation of precursor metabolites and energy;lipid metabolic process;nucleobase-containing small molecule metabolic process;sulfur compound metabolic process	2: Precursors/Energy	Other
SPBC1703.10	vesicle-mediated transport	6: Other metabolism	NA
SPBC1703.12	vesicle-mediated transport	6: Other metabolism	NA
SPBC1703.13c	transmembrane transport	6: Other metabolism	NA
SPBC1703.15c	vesicle-mediated transport	6: Other metabolism	NA
SPBC1709.02c	cellular amino acid metabolic process	3: Amino acids	NA
SPBC1709.05	translation	0: Translation/RiBi	NA
SPBC1709.07	lipid metabolic process	4: Lipids	NA
SPBC1709.13c	translation	0: Translation/RiBi	NA
SPBC1709.17	cellular amino acid metabolic process	3: Amino acids	NA
SPBC1709.18	translation	0: Translation/RiBi	NA
SPBC1709.19c	sulfur compound metabolic process	6: Other metabolism	NA
SPBC1711.04	nucleobase-containing small molecule metabolic process;vitamin metabolic process	5: Vitamins	NA
SPBC1711.06	translation	0: Translation/RiBi	NA
SPBC1711.07	translation	0: Translation/RiBi	NA
SPBC1711.09c	vesicle-mediated transport	6: Other metabolism	NA
SPBC1711.13	cellular amino acid metabolic process	3: Amino acids	NA
SPBC1711.16	translation	0: Translation/RiBi	NA
SPBC1718.04	lipid metabolic process	4: Lipids	NA
SPBC1718.05	vesicle-mediated transport	6: Other metabolism	NA
SPBC1734.01c	translation	0: Translation/RiBi	NA
SPBC1734.03	vitamin metabolic process	5: Vitamins	NA
SPBC1734.08	vesicle-mediated transport	6: Other metabolism	NA
SPBC1734.12c	lipid metabolic process	4: Lipids	NA
SPBC1734.13	generation of precursor metabolites and energy;nucleobase-containing small molecule metabolic process;transmembrane transport;oxidative phosphorylation	2: Precursors/Energy	OXPHOS
SPBC1773.05c	carbohydrate metabolic process	6: Other metabolism	NA
SPBC1773.06c	generation of precursor metabolites and energy	2: Precursors/Energy	Other
SPBC1773.10c	cellular amino acid metabolic process	3: Amino acids	NA
SPBC1773.14	cellular amino acid metabolic process;nitrogen cycle metabolic process	3: Amino acids	NA
SPBC1773.15	transmembrane transport	6: Other metabolism	NA
SPBC1773.17c	generation of precursor metabolites and energy	2: Precursors/Energy	Other
SPBC1778.01c	translation	0: Translation/RiBi	NA
SPBC1778.03c	nucleobase-containing small molecule metabolic process	6: Other metabolism	NA
SPBC1778.06c	vesicle-mediated transport	6: Other metabolism	NA
SPBC1778.08c	vesicle-mediated transport	6: Other metabolism	NA
SPBC1778.09	vesicle-mediated transport	6: Other metabolism	NA
SPBC17A3.01c	transmembrane transport	6: Other metabolism	NA
SPBC17A3.04c	cellular amino acid metabolic process	3: Amino acids	NA
SPBC17A3.07	sulfur compound metabolic process	6: Other metabolism	NA
SPBC17D1.03c	translation	0: Translation/RiBi	NA
SPBC17D1.06	translation	0: Translation/RiBi	NA
SPBC17D11.05	translation	0: Translation/RiBi	NA
SPBC17G9.03c	cellular amino acid metabolic process	3: Amino acids	NA
SPBC17G9.04c	translation	0: Translation/RiBi	NA
SPBC17G9.06c	secondary metabolic process	6: Other metabolism	NA
SPBC17G9.07	translation	0: Translation/RiBi	NA
SPBC17G9.09	translation	0: Translation/RiBi	NA
SPBC17G9.10;SPAC26A3.07c	translation	0: Translation/RiBi	NA
SPBC17G9.11c	carbohydrate metabolic process;generation of precursor metabolites and energy	2: Precursors/Energy	Other
SPBC1815.01	carbohydrate metabolic process;generation of precursor metabolites and energy;nucleobase-containing small molecule metabolic process;canonical glycolysis	1: Glycolysis	NA
SPBC1861.05	nucleobase-containing small molecule metabolic process	6: Other metabolism	NA
SPBC18A7.02c	vesicle-mediated transport	6: Other metabolism	NA
SPBC18E5.02c	lipid metabolic process	4: Lipids	NA
SPBC18E5.04	translation	0: Translation/RiBi	NA
SPBC18E5.06	translation	0: Translation/RiBi	NA
SPBC18H10.02	lipid metabolic process;nucleobase-containing small molecule metabolic process;sulfur compound metabolic process	4: Lipids	NA
SPBC18H10.03;REV__SPBC15D4.03	translation	0: Translation/RiBi	NA
SPBC18H10.04c	translation	0: Translation/RiBi	NA
SPBC18H10.12c	translation	0: Translation/RiBi	NA
SPBC18H10.13;SPAC3H5.05c	translation	0: Translation/RiBi	NA
SPBC18H10.14;SPAC664.04c	translation	0: Translation/RiBi	NA
SPBC18H10.16	transmembrane transport	6: Other metabolism	NA
SPBC18H10.20c	vesicle-mediated transport	6: Other metabolism	NA
SPBC1921.01c	translation	0: Translation/RiBi	NA
SPBC1921.03c	translation	0: Translation/RiBi	NA
SPBC1921.06c	carbohydrate metabolic process	6: Other metabolism	NA
SPBC19C2.07	carbohydrate metabolic process;generation of precursor metabolites and energy;nucleobase-containing small molecule metabolic process;canonical glycolysis	1: Glycolysis	NA
SPBC19C2.09	lipid metabolic process	4: Lipids	NA
SPBC19C2.10	vesicle-mediated transport	6: Other metabolism	NA
SPBC19C2.15c	lipid metabolic process	4: Lipids	NA
SPBC19C7.03	nucleobase-containing small molecule metabolic process	6: Other metabolism	NA
SPBC19C7.06	cellular amino acid metabolic process	3: Amino acids	NA
SPBC19C7.11	transmembrane transport	6: Other metabolism	NA
SPBC19F5.02c	translation	0: Translation/RiBi	NA
SPBC19F5.03	lipid metabolic process	4: Lipids	NA
SPBC19F5.04	cellular amino acid metabolic process;sulfur compound metabolic process	3: Amino acids	NA
SPBC19F5.05c	translation	0: Translation/RiBi	NA
SPBC19F8.03c	vesicle-mediated transport	6: Other metabolism	NA
SPBC19F8.08	translation	0: Translation/RiBi	NA
SPBC19G7.02	vitamin metabolic process	5: Vitamins	NA
SPBC19G7.03c;SPAC19B12.04	translation	0: Translation/RiBi	NA
SPBC19G7.05c	carbohydrate metabolic process	6: Other metabolism	NA
SPBC19G7.14c	vesicle-mediated transport	6: Other metabolism	NA
SPBC19G7.15	translation	0: Translation/RiBi	NA
SPBC19G7.17	transmembrane transport	6: Other metabolism	NA
SPBC19G7.19	transmembrane transport	6: Other metabolism	NA
SPBC1A4.02c	cellular amino acid metabolic process	3: Amino acids	NA
SPBC1A4.06c	lipid metabolic process	4: Lipids	NA
SPBC1A4.07c	translation	0: Translation/RiBi	NA
SPBC1A4.09	translation	0: Translation/RiBi	NA
SPBC20F10.01	translation	0: Translation/RiBi	NA
SPBC20F10.09	translation	0: Translation/RiBi	NA
SPBC211.03c	vesicle-mediated transport	6: Other metabolism	NA
SPBC211.08c	translation	0: Translation/RiBi	NA
SPBC215.01	vesicle-mediated transport	6: Other metabolism	NA
SPBC215.05	carbohydrate metabolic process	6: Other metabolism	NA
SPBC215.06c	translation	0: Translation/RiBi	NA
SPBC215.08c	cellular amino acid metabolic process;nitrogen cycle metabolic process;nucleobase-containing small molecule metabolic process	3: Amino acids	NA
SPBC215.09c	lipid metabolic process	4: Lipids	NA
SPBC215.14c	vesicle-mediated transport	6: Other metabolism	NA
SPBC215.15	vesicle-mediated transport	6: Other metabolism	NA
SPBC21B10.04c	generation of precursor metabolites and energy	2: Precursors/Energy	Other
SPBC21B10.07	carbohydrate metabolic process	6: Other metabolism	NA
SPBC21B10.09	transmembrane transport	6: Other metabolism	NA
SPBC21B10.10	translation	0: Translation/RiBi	NA
SPBC21C3.01c	vesicle-mediated transport	6: Other metabolism	NA
SPBC21C3.08c	cellular amino acid metabolic process	3: Amino acids	NA
SPBC21C3.09c	cellular amino acid metabolic process	3: Amino acids	NA
SPBC21C3.10c	vitamin metabolic process	5: Vitamins	NA
SPBC21C3.13	translation	0: Translation/RiBi	NA
SPBC21C3.17c	vesicle-mediated transport	6: Other metabolism	NA
SPBC21C3.19	translation	0: Translation/RiBi	NA
SPBC21D10.05c	vesicle-mediated transport	6: Other metabolism	NA
SPBC21D10.11c	sulfur compound metabolic process	6: Other metabolism	NA
SPBC21H7.03c	generation of precursor metabolites and energy	2: Precursors/Energy	Other
SPBC21H7.04	translation	0: Translation/RiBi	NA
SPBC21H7.07c	cellular amino acid metabolic process	3: Amino acids	NA
SPBC23E6.04c	translation	0: Translation/RiBi	NA
SPBC23E6.05	translation	0: Translation/RiBi	NA
SPBC23E6.06c	generation of precursor metabolites and energy;vitamin metabolic process	2: Precursors/Energy	Other
SPBC23E6.08	vesicle-mediated transport	6: Other metabolism	NA
SPBC23E6.10c	cellular amino acid metabolic process;sulfur compound metabolic process	3: Amino acids	NA
SPBC23G7.05	translation	0: Translation/RiBi	NA
SPBC23G7.07c	translation	0: Translation/RiBi	NA
SPBC23G7.08c	vesicle-mediated transport	6: Other metabolism	NA
SPBC23G7.13c	transmembrane transport	6: Other metabolism	NA
SPBC23G7.15c	translation	0: Translation/RiBi	NA
SPBC23G7.16	transmembrane transport	6: Other metabolism	NA
SPBC244.02c	translation	0: Translation/RiBi	NA
SPBC24C6.02	translation	0: Translation/RiBi	NA
SPBC24C6.03	cellular amino acid metabolic process	3: Amino acids	NA
SPBC24C6.04	cellular amino acid metabolic process	3: Amino acids	NA
SPBC24C6.05	vesicle-mediated transport	6: Other metabolism	NA
SPBC25B2.01	translation	0: Translation/RiBi	NA
SPBC25B2.05	translation	0: Translation/RiBi	NA
SPBC25B2.09c	cellular amino acid metabolic process	3: Amino acids	NA
SPBC25D12.04	nucleobase-containing small molecule metabolic process	6: Other metabolism	NA
SPBC25H2.02	cellular amino acid metabolic process	3: Amino acids	NA
SPBC25H2.03	lipid metabolic process	4: Lipids	NA
SPBC25H2.06c	vesicle-mediated transport	6: Other metabolism	NA
SPBC25H2.07	translation	0: Translation/RiBi	NA
SPBC25H2.15	translation	0: Translation/RiBi	NA
SPBC25H2.16c	vesicle-mediated transport	6: Other metabolism	NA
SPBC26H8.01	sulfur compound metabolic process;vitamin metabolic process	5: Vitamins	NA
SPBC26H8.02c	vesicle-mediated transport	6: Other metabolism	NA
SPBC26H8.03	lipid metabolic process	4: Lipids	NA
SPBC26H8.06	sulfur compound metabolic process	6: Other metabolism	NA
SPBC26H8.08c	translation	0: Translation/RiBi	NA
SPBC26H8.10	translation	0: Translation/RiBi	NA
SPBC26H8.11c	lipid metabolic process;nucleobase-containing small molecule metabolic process;sulfur compound metabolic process	4: Lipids	NA
SPBC27.01c	vesicle-mediated transport	6: Other metabolism	NA
SPBC27.06c	transmembrane transport	6: Other metabolism	NA
SPBC27.08c	sulfur compound metabolic process	6: Other metabolism	NA
SPBC27B12.03c	lipid metabolic process	4: Lipids	NA
SPBC27B12.06	lipid metabolic process	4: Lipids	NA
SPBC27B12.08	vesicle-mediated transport	6: Other metabolism	NA
SPBC27B12.10c	transmembrane transport	6: Other metabolism	NA
SPBC27B12.12c	transmembrane transport	6: Other metabolism	NA
SPBC27B12.13	transmembrane transport	6: Other metabolism	NA
SPBC28E12.05	translation	0: Translation/RiBi	NA
SPBC29A10.01	lipid metabolic process	4: Lipids	NA
SPBC29A10.08	carbohydrate metabolic process	6: Other metabolism	NA
SPBC29A10.11c	vesicle-mediated transport	6: Other metabolism	NA
SPBC29A10.13	generation of precursor metabolites and energy;nucleobase-containing small molecule metabolic process;transmembrane transport;oxidative phosphorylation	2: Precursors/Energy	OXPHOS
SPBC29A10.16c	lipid metabolic process	4: Lipids	NA
SPBC29A3.01	transmembrane transport	6: Other metabolism	NA
SPBC29A3.02c	cellular amino acid metabolic process	3: Amino acids	NA
SPBC29A3.04	translation	0: Translation/RiBi	NA
SPBC29A3.06	translation	0: Translation/RiBi	NA
SPBC29A3.09c	translation	0: Translation/RiBi	NA
SPBC29A3.10c	generation of precursor metabolites and energy;nucleobase-containing small molecule metabolic process;transmembrane transport;oxidative phosphorylation	2: Precursors/Energy	OXPHOS
SPBC29A3.11c	transmembrane transport	6: Other metabolism	NA
SPBC29A3.12	translation	0: Translation/RiBi	NA
SPBC29A3.16	translation	0: Translation/RiBi	NA
SPBC29A3.18	generation of precursor metabolites and energy;oxidative phosphorylation	2: Precursors/Energy	OXPHOS
SPBC29B5.02c	transmembrane transport	6: Other metabolism	NA
SPBC29B5.03c	translation	0: Translation/RiBi	NA
SPBC29B5.04c	lipid metabolic process	4: Lipids	NA
SPBC2A9.05c	vesicle-mediated transport	6: Other metabolism	NA
SPBC2A9.06c	lipid metabolic process	4: Lipids	NA
SPBC2A9.08c	vesicle-mediated transport	6: Other metabolism	NA
SPBC2D10.04	vesicle-mediated transport	6: Other metabolism	NA
SPBC2D10.05	carbohydrate metabolic process	6: Other metabolism	NA
SPBC2D10.09	cellular amino acid metabolic process	3: Amino acids	NA
SPBC2D10.10c	translation	0: Translation/RiBi	NA
SPBC2F12.04	translation	0: Translation/RiBi	NA
SPBC2F12.05c	vesicle-mediated transport	6: Other metabolism	NA
SPBC2F12.14c	nucleobase-containing small molecule metabolic process	6: Other metabolism	NA
SPBC2F12.17	generation of precursor metabolites and energy;oxidative phosphorylation	2: Precursors/Energy	OXPHOS
SPBC2G2.01c	transmembrane transport	6: Other metabolism	NA
SPBC2G2.02	carbohydrate metabolic process;lipid metabolic process	4: Lipids	NA
SPBC2G2.03c	transmembrane transport	6: Other metabolism	NA
SPBC2G2.04c	cellular amino acid metabolic process	3: Amino acids	NA
SPBC2G2.05	translation	0: Translation/RiBi	NA
SPBC2G2.06c	vesicle-mediated transport	6: Other metabolism	NA
SPBC2G2.08	nucleobase-containing small molecule metabolic process;vitamin metabolic process	5: Vitamins	NA
SPBC2G2.11	lipid metabolic process	4: Lipids	NA
SPBC2G2.12	cellular amino acid metabolic process	3: Amino acids	NA
SPBC2G2.13c	nucleobase-containing small molecule metabolic process	6: Other metabolism	NA
SPBC2G2.16	nucleobase-containing small molecule metabolic process	6: Other metabolism	NA
SPBC2G5.04c	vesicle-mediated transport	6: Other metabolism	NA
SPBC2G5.05	generation of precursor metabolites and energy	2: Precursors/Energy	Other
SPBC2G5.06c	secondary metabolic process;sulfur compound metabolic process	6: Other metabolism	NA
SPBC30B4.02c	translation	0: Translation/RiBi	NA
SPBC30D10.03c	nucleobase-containing small molecule metabolic process	6: Other metabolism	NA
SPBC30D10.13c	nucleobase-containing small molecule metabolic process;sulfur compound metabolic process	6: Other metabolism	NA
SPBC30D10.15	translation	0: Translation/RiBi	NA
SPBC30D10.16	cellular amino acid metabolic process	3: Amino acids	NA
SPBC30D10.18c	translation	0: Translation/RiBi	NA
SPBC31E1.02c	transmembrane transport	6: Other metabolism	NA
SPBC31E1.04	vesicle-mediated transport	6: Other metabolism	NA
SPBC31E1.06	translation	0: Translation/RiBi	NA
SPBC31F10.02	lipid metabolic process;nucleobase-containing small molecule metabolic process;sulfur compound metabolic process	4: Lipids	NA
SPBC31F10.03	sulfur compound metabolic process	6: Other metabolism	NA
SPBC31F10.06c	vesicle-mediated transport	6: Other metabolism	NA
SPBC31F10.07	vesicle-mediated transport	6: Other metabolism	NA
SPBC31F10.12	translation	0: Translation/RiBi	NA
SPBC31F10.15c	generation of precursor metabolites and energy;nucleobase-containing small molecule metabolic process;transmembrane transport;oxidative phosphorylation	2: Precursors/Energy	OXPHOS
SPBC31F10.16	vesicle-mediated transport	6: Other metabolism	NA
SPBC32F12.01c	lipid metabolic process	4: Lipids	NA
SPBC32F12.10	carbohydrate metabolic process;generation of precursor metabolites and energy;nucleobase-containing small molecule metabolic process	2: Precursors/Energy	Other
SPBC32F12.11	carbohydrate metabolic process;generation of precursor metabolites and energy;nucleobase-containing small molecule metabolic process;canonical glycolysis	1: Glycolysis	NA
SPBC32F12.12c	vesicle-mediated transport	6: Other metabolism	NA
SPBC32H8.04c	translation	0: Translation/RiBi	NA
SPBC32H8.12c	vesicle-mediated transport	6: Other metabolism	NA
SPBC336.02	translation	0: Translation/RiBi	NA
SPBC336.10c	translation	0: Translation/RiBi	NA
SPBC336.11	vesicle-mediated transport	6: Other metabolism	NA
SPBC337.09	lipid metabolic process	4: Lipids	NA
SPBC337.10c	sulfur compound metabolic process	6: Other metabolism	NA
SPBC337.16	lipid metabolic process	4: Lipids	NA
SPBC342.01c	lipid metabolic process	4: Lipids	NA
SPBC342.02	cellular amino acid metabolic process	3: Amino acids	NA
SPBC354.02c	transmembrane transport	6: Other metabolism	NA
SPBC354.07c	lipid metabolic process	4: Lipids	NA
SPBC354.08c	transmembrane transport	6: Other metabolism	NA
SPBC354.12	carbohydrate metabolic process;generation of precursor metabolites and energy;nucleobase-containing small molecule metabolic process;canonical glycolysis	1: Glycolysis	NA
SPBC354.15	cellular amino acid metabolic process	3: Amino acids	NA
SPBC359.03c	transmembrane transport	6: Other metabolism	NA
SPBC359.05	transmembrane transport	6: Other metabolism	NA
SPBC36.03c	transmembrane transport	6: Other metabolism	NA
SPBC36.04	cellular amino acid metabolic process;sulfur compound metabolic process	3: Amino acids	NA
SPBC36.06c	lipid metabolic process	4: Lipids	NA
SPBC36.08c	vesicle-mediated transport	6: Other metabolism	NA
SPBC365.02c	generation of precursor metabolites and energy;tetrapyrrole metabolic process	2: Precursors/Energy	Other
SPBC365.03c	translation	0: Translation/RiBi	NA
SPBC365.04c	translation	0: Translation/RiBi	NA
SPBC365.11	vesicle-mediated transport	6: Other metabolism	NA
SPBC365.13c	translation	0: Translation/RiBi	NA
SPBC365.14c	carbohydrate metabolic process;nucleobase-containing small molecule metabolic process	6: Other metabolism	NA
SPBC36B7.03	transmembrane transport	6: Other metabolism	NA
SPBC36B7.07	vesicle-mediated transport	6: Other metabolism	NA
SPBC3B8.01c	generation of precursor metabolites and energy;sulfur compound metabolic process	2: Precursors/Energy	Other
SPBC3B8.03	cellular amino acid metabolic process	3: Amino acids	NA
SPBC3B8.04c	transmembrane transport	6: Other metabolism	NA
SPBC3B8.07c	lipid metabolic process	4: Lipids	NA
SPBC3B8.09	translation	0: Translation/RiBi	NA
SPBC3B9.05	transmembrane transport	6: Other metabolism	NA
SPBC3B9.10	vesicle-mediated transport	6: Other metabolism	NA
SPBC3B9.13c	translation	0: Translation/RiBi	NA
SPBC3B9.17	sulfur compound metabolic process	6: Other metabolism	NA
SPBC3B9.18c	transmembrane transport	6: Other metabolism	NA
SPBC3B9.19	sulfur compound metabolic process;transmembrane transport	6: Other metabolism	NA
SPBC3D6.05	lipid metabolic process	4: Lipids	NA
SPBC3D6.06c	nucleobase-containing small molecule metabolic process	6: Other metabolism	NA
SPBC3D6.12	translation	0: Translation/RiBi	NA
SPBC3D6.15;SPAC694.05c	translation	0: Translation/RiBi	NA
SPBC3E7.06c	transmembrane transport	6: Other metabolism	NA
SPBC3E7.11c	transmembrane transport	6: Other metabolism	NA
SPBC3E7.15c	lipid metabolic process	4: Lipids	NA
SPBC3E7.16c	cellular amino acid metabolic process	3: Amino acids	NA
SPBC3F6.02c	lipid metabolic process	4: Lipids	NA
SPBC3F6.04c	translation	0: Translation/RiBi	NA
SPBC3H7.01	vesicle-mediated transport	6: Other metabolism	NA
SPBC3H7.02	transmembrane transport	6: Other metabolism	NA
SPBC3H7.03c	generation of precursor metabolites and energy;tricarboxylic acid cycle	2: Precursors/Energy	TCA cycle
SPBC3H7.05c	lipid metabolic process	4: Lipids	NA
SPBC3H7.07c;REV__SPBC3H7.07c	cellular amino acid metabolic process	3: Amino acids	NA
SPBC3H7.15	vesicle-mediated transport	6: Other metabolism	NA
SPBC4.02c	translation	0: Translation/RiBi	NA
SPBC4.03c	vesicle-mediated transport	6: Other metabolism	NA
SPBC4.06	lipid metabolic process	4: Lipids	NA
SPBC405.01	nucleobase-containing small molecule metabolic process	6: Other metabolism	NA
SPBC405.04c	vesicle-mediated transport	6: Other metabolism	NA
SPBC409.10	nucleobase-containing small molecule metabolic process	6: Other metabolism	NA
SPBC409.13	vitamin metabolic process	5: Vitamins	NA
SPBC409.15	translation	0: Translation/RiBi	NA
SPBC409.18	lipid metabolic process	4: Lipids	NA
SPBC409.20c	vesicle-mediated transport	6: Other metabolism	NA
SPBC409.21	transmembrane transport	6: Other metabolism	NA
SPBC418.01c	cellular amino acid metabolic process	3: Amino acids	NA
SPBC428.01c	translation	0: Translation/RiBi	NA
SPBC428.02c	cellular amino acid metabolic process	3: Amino acids	NA
SPBC428.03c	sulfur compound metabolic process;vitamin metabolic process	5: Vitamins	NA
SPBC428.04	lipid metabolic process	4: Lipids	NA
SPBC428.05c	cellular amino acid metabolic process;nitrogen cycle metabolic process	3: Amino acids	NA
SPBC428.11	cellular amino acid metabolic process;sulfur compound metabolic process	3: Amino acids	NA
SPBC428.14	lipid metabolic process	4: Lipids	NA
SPBC428.19c	translation	0: Translation/RiBi	NA
SPBC460.01c	transmembrane transport	6: Other metabolism	NA
SPBC460.02c	translation	0: Translation/RiBi	NA
SPBC460.04c	sulfur compound metabolic process	6: Other metabolism	NA
SPBC4B4.01c	nucleobase-containing small molecule metabolic process	6: Other metabolism	NA
SPBC4B4.04	translation	0: Translation/RiBi	NA
SPBC4B4.08	transmembrane transport	6: Other metabolism	NA
SPBC4C3.03	cellular amino acid metabolic process;sulfur compound metabolic process	3: Amino acids	NA
SPBC4C3.04c	vesicle-mediated transport	6: Other metabolism	NA
SPBC4C3.06	vesicle-mediated transport	6: Other metabolism	NA
SPBC4C3.07	translation	0: Translation/RiBi	NA
SPBC4F6.04	translation	0: Translation/RiBi	NA
SPBC4F6.05c	vesicle-mediated transport	6: Other metabolism	NA
SPBC4F6.07c	translation	0: Translation/RiBi	NA
SPBC4F6.09	transmembrane transport	6: Other metabolism	NA
SPBC4F6.10	vesicle-mediated transport	6: Other metabolism	NA
SPBC4F6.13c	translation	0: Translation/RiBi	NA
SPBC4F6.14	translation	0: Translation/RiBi	NA
SPBC4F6.18c	vesicle-mediated transport	6: Other metabolism	NA
SPBC530.01	vesicle-mediated transport	6: Other metabolism	NA
SPBC530.09c	vesicle-mediated transport	6: Other metabolism	NA
SPBC530.10c	transmembrane transport	6: Other metabolism	NA
SPBC530.12c	lipid metabolic process	4: Lipids	NA
SPBC543.06c	translation	0: Translation/RiBi	NA
SPBC543.08	lipid metabolic process	4: Lipids	NA
SPBC56F2.02	translation	0: Translation/RiBi	NA
SPBC56F2.04	translation	0: Translation/RiBi	NA
SPBC56F2.07c	translation	0: Translation/RiBi	NA
SPBC56F2.09c	cellular amino acid metabolic process;nitrogen cycle metabolic process	3: Amino acids	NA
SPBC56F2.10c	lipid metabolic process	4: Lipids	NA
SPBC56F2.11	cellular amino acid metabolic process;sulfur compound metabolic process	3: Amino acids	NA
SPBC56F2.12	cellular amino acid metabolic process	3: Amino acids	NA
SPBC577.02	translation	0: Translation/RiBi	NA
SPBC577.06c	lipid metabolic process	4: Lipids	NA
SPBC577.13	carbohydrate metabolic process;lipid metabolic process	4: Lipids	NA
SPBC582.08	cellular amino acid metabolic process	3: Amino acids	NA
SPBC582.09	lipid metabolic process	4: Lipids	NA
SPBC609.04	transmembrane transport	6: Other metabolism	NA
SPBC646.05c	lipid metabolic process	4: Lipids	NA
SPBC646.07c	lipid metabolic process	4: Lipids	NA
SPBC646.08c	lipid metabolic process	4: Lipids	NA
SPBC646.09c	translation	0: Translation/RiBi	NA
SPBC646.10c	translation	0: Translation/RiBi	NA
SPBC646.15c	transmembrane transport	6: Other metabolism	NA
SPBC649.02	translation	0: Translation/RiBi	NA
SPBC651.01c	translation	0: Translation/RiBi	NA
SPBC651.02	nucleobase-containing small molecule metabolic process	6: Other metabolism	NA
SPBC651.11c	vesicle-mediated transport	6: Other metabolism	NA
SPBC660.07	carbohydrate metabolic process	6: Other metabolism	NA
SPBC660.12c	sulfur compound metabolic process	6: Other metabolism	NA
SPBC660.16	carbohydrate metabolic process;generation of precursor metabolites and energy;nucleobase-containing small molecule metabolic process	2: Precursors/Energy	Other
SPBC685.04c	vesicle-mediated transport	6: Other metabolism	NA
SPBC685.06	translation	0: Translation/RiBi	NA
SPBC685.07c	translation	0: Translation/RiBi	NA
SPBC691.02c	vesicle-mediated transport	6: Other metabolism	NA
SPBC691.03c	vesicle-mediated transport	6: Other metabolism	NA
SPBC691.05c	transmembrane transport	6: Other metabolism	NA
SPBC713.03	generation of precursor metabolites and energy	2: Precursors/Energy	Other
SPBC713.04c	translation	0: Translation/RiBi	NA
SPBC713.07c	generation of precursor metabolites and energy	2: Precursors/Energy	Other
SPBC713.10	transmembrane transport	6: Other metabolism	NA
SPBC713.12	lipid metabolic process	4: Lipids	NA
SPBC725.01	cellular amino acid metabolic process;sulfur compound metabolic process	3: Amino acids	NA
SPBC725.03	vitamin metabolic process	5: Vitamins	NA
SPBC725.04	lipid metabolic process	4: Lipids	NA
SPBC725.05c	nucleobase-containing small molecule metabolic process	6: Other metabolism	NA
SPBC725.07	transmembrane transport	6: Other metabolism	NA
SPBC725.10	transmembrane transport	6: Other metabolism	NA
SPBC725.14	cellular amino acid metabolic process	3: Amino acids	NA
SPBC725.15	nucleobase-containing small molecule metabolic process	6: Other metabolism	NA
SPBC776.03	cellular amino acid metabolic process;sulfur compound metabolic process	3: Amino acids	NA
SPBC776.04	vesicle-mediated transport	6: Other metabolism	NA
SPBC776.07	translation	0: Translation/RiBi	NA
SPBC776.08c	translation	0: Translation/RiBi	NA
SPBC776.10c	vesicle-mediated transport	6: Other metabolism	NA
SPBC776.11	translation	0: Translation/RiBi	NA
SPBC776.14	lipid metabolic process	4: Lipids	NA
SPBC776.15c	cellular amino acid metabolic process;generation of precursor metabolites and energy;nucleobase-containing small molecule metabolic process;sulfur compound metabolic process;tricarboxylic acid cycle	2: Precursors/Energy	TCA cycle
SPBC776.17	translation	0: Translation/RiBi	NA
SPBC800.04c	translation	0: Translation/RiBi	NA
SPBC800.06	translation	0: Translation/RiBi	NA
SPBC800.10c	vesicle-mediated transport	6: Other metabolism	NA
SPBC800.11	nucleobase-containing small molecule metabolic process	6: Other metabolism	NA
SPBC83.01	vesicle-mediated transport	6: Other metabolism	NA
SPBC83.02c	translation	0: Translation/RiBi	NA
SPBC83.11	transmembrane transport	6: Other metabolism	NA
SPBC83.13	transmembrane transport	6: Other metabolism	NA
SPBC83.15	translation	0: Translation/RiBi	NA
SPBC839.02	vesicle-mediated transport	6: Other metabolism	NA
SPBC839.04;SPBC2F12.07c;SPAC1F7.13c	translation	0: Translation/RiBi	NA
SPBC839.05c	translation	0: Translation/RiBi	NA
SPBC839.06	transmembrane transport	6: Other metabolism	NA
SPBC839.08c	lipid metabolic process	4: Lipids	NA
SPBC839.11c	transmembrane transport	6: Other metabolism	NA
SPBC839.13c	translation	0: Translation/RiBi	NA
SPBC839.14c	vesicle-mediated transport	6: Other metabolism	NA
SPBC839.15c;SPAC23A1.10	translation	0: Translation/RiBi	NA
SPBC839.16	nucleobase-containing small molecule metabolic process;vitamin metabolic process	5: Vitamins	NA
SPBC887.01	cellular amino acid metabolic process;sulfur compound metabolic process	3: Amino acids	NA
SPBC887.02	transmembrane transport	6: Other metabolism	NA
SPBC887.03c	translation	0: Translation/RiBi	NA
SPBC887.06c	vesicle-mediated transport	6: Other metabolism	NA
SPBC887.12	vesicle-mediated transport	6: Other metabolism	NA
SPBC887.13c	lipid metabolic process	4: Lipids	NA
SPBC887.15c	lipid metabolic process	4: Lipids	NA
SPBC887.17	transmembrane transport	6: Other metabolism	NA
SPBC887.19	lipid metabolic process	4: Lipids	NA
SPBC8D2.02c	vesicle-mediated transport	6: Other metabolism	NA
SPBC8D2.06	cellular amino acid metabolic process	3: Amino acids	NA
SPBC8D2.10c	translation	0: Translation/RiBi	NA
SPBC8D2.14c	vesicle-mediated transport	6: Other metabolism	NA
SPBC8D2.15	lipid metabolic process;sulfur compound metabolic process	4: Lipids	NA
SPBC8D2.18c	cellular amino acid metabolic process;sulfur compound metabolic process	3: Amino acids	NA
SPBC8D2.20c	vesicle-mediated transport	6: Other metabolism	NA
SPBC8E4.01c	transmembrane transport	6: Other metabolism	NA
SPBC8E4.03	cellular amino acid metabolic process;nitrogen cycle metabolic process	3: Amino acids	NA
SPBC8E4.04	carbohydrate metabolic process	6: Other metabolism	NA
SPBC902.05c	generation of precursor metabolites and energy;tricarboxylic acid cycle	2: Precursors/Energy	TCA cycle
SPBC947.02	vesicle-mediated transport	6: Other metabolism	NA
SPBC947.15c	generation of precursor metabolites and energy;oxidative phosphorylation	2: Precursors/Energy	OXPHOS
SPBC9B6.03	vesicle-mediated transport	6: Other metabolism	NA
SPBC9B6.05c	translation	0: Translation/RiBi	NA
SPBC9B6.07	translation	0: Translation/RiBi	NA
SPBC9B6.08	vesicle-mediated transport	6: Other metabolism	NA
SPBC9B6.09c	transmembrane transport	6: Other metabolism	NA
SPBC9B6.11c	translation	0: Translation/RiBi	NA
SPBP16F5.05c	translation	0: Translation/RiBi	NA
SPBP16F5.06	translation	0: Translation/RiBi	NA
SPBP16F5.07	vesicle-mediated transport	6: Other metabolism	NA
SPBP18G5.02	lipid metabolic process	4: Lipids	NA
SPBP19A11.01	cellular amino acid metabolic process	3: Amino acids	NA
SPBP22H7.02c	translation	0: Translation/RiBi	NA
SPBP22H7.06	nucleobase-containing small molecule metabolic process	6: Other metabolism	NA
SPBP22H7.08	translation	0: Translation/RiBi	NA
SPBP23A10.06	transmembrane transport	6: Other metabolism	NA
SPBP23A10.11c	carbohydrate metabolic process	6: Other metabolism	NA
SPBP26C9.02c	cellular amino acid metabolic process;nitrogen cycle metabolic process	3: Amino acids	NA
SPBP35G2.07	cellular amino acid metabolic process	3: Amino acids	NA
SPBP35G2.12	nucleobase-containing small molecule metabolic process	6: Other metabolism	NA
SPBP4H10.05c	nucleobase-containing small molecule metabolic process;sulfur compound metabolic process;vitamin metabolic process	5: Vitamins	NA
SPBP4H10.08	generation of precursor metabolites and energy;oxidative phosphorylation	2: Precursors/Energy	OXPHOS
SPBP4H10.11c	lipid metabolic process;nucleobase-containing small molecule metabolic process;sulfur compound metabolic process	4: Lipids	NA
SPBP4H10.13;SPAC23C11.02c	translation	0: Translation/RiBi	NA
SPBP4H10.15	cellular amino acid metabolic process;generation of precursor metabolites and energy;tricarboxylic acid cycle	2: Precursors/Energy	TCA cycle
SPBP8B7.03c	translation	0: Translation/RiBi	NA
SPBP8B7.06	translation	0: Translation/RiBi	NA
SPBP8B7.16c	translation	0: Translation/RiBi	NA
SPBP8B7.17c	sulfur compound metabolic process;vitamin metabolic process	5: Vitamins	NA
SPBP8B7.18c	sulfur compound metabolic process;vitamin metabolic process	5: Vitamins	NA
SPBP8B7.20c	translation	0: Translation/RiBi	NA
SPBP8B7.22	vesicle-mediated transport	6: Other metabolism	NA
SPBP8B7.29	cellular amino acid metabolic process;vitamin metabolic process	3: Amino acids	NA
SPBPB10D8.02c	lipid metabolic process;sulfur compound metabolic process	4: Lipids	NA
SPBPB21E7.01c	carbohydrate metabolic process;generation of precursor metabolites and energy;nucleobase-containing small molecule metabolic process;canonical glycolysis	1: Glycolysis	NA
SPBPB21E7.09	cellular amino acid metabolic process	3: Amino acids	NA
SPBPB2B2.01	transmembrane transport	6: Other metabolism	NA
SPBPB2B2.06c	nucleobase-containing small molecule metabolic process	6: Other metabolism	NA
SPBPB2B2.09c	vitamin metabolic process	5: Vitamins	NA
SPBPB2B2.10c	carbohydrate metabolic process;nucleobase-containing small molecule metabolic process	6: Other metabolism	NA
SPBPB2B2.13	carbohydrate metabolic process;nucleobase-containing small molecule metabolic process	6: Other metabolism	NA
SPBPJ4664.01	lipid metabolic process	4: Lipids	NA
SPBPJ4664.04	vesicle-mediated transport	6: Other metabolism	NA
SPBPJ4664.06	nucleobase-containing small molecule metabolic process	6: Other metabolism	NA
SPCC1020.06c	generation of precursor metabolites and energy	2: Precursors/Energy	Other
SPCC1020.07	nucleobase-containing small molecule metabolic process	6: Other metabolism	NA
SPCC1183.01	vesicle-mediated transport	6: Other metabolism	NA
SPCC1183.03c	sulfur compound metabolic process;tetrapyrrole metabolic process	6: Other metabolism	NA
SPCC1183.07	translation	0: Translation/RiBi	NA
SPCC1183.08c	translation	0: Translation/RiBi	NA
SPCC1183.09c	transmembrane transport	6: Other metabolism	NA
SPCC1183.11	transmembrane transport	6: Other metabolism	NA
SPCC11E10.01	cellular amino acid metabolic process;sulfur compound metabolic process	3: Amino acids	NA
SPCC11E10.02c	lipid metabolic process	4: Lipids	NA
SPCC11E10.05c	nucleobase-containing small molecule metabolic process	6: Other metabolism	NA
SPCC11E10.07c	translation	0: Translation/RiBi	NA
SPCC1223.02	sulfur compound metabolic process;vitamin metabolic process	5: Vitamins	NA
SPCC1223.03c	carbohydrate metabolic process	6: Other metabolism	NA
SPCC1223.05c;SPAPB17E12.05	translation	0: Translation/RiBi	NA
SPCC1223.07c	cellular amino acid metabolic process	3: Amino acids	NA
SPCC1223.08c	lipid metabolic process;vitamin metabolic process	4: Lipids	NA
SPCC1223.09	nitrogen cycle metabolic process;nucleobase-containing small molecule metabolic process	6: Other metabolism	NA
SPCC1235.02	sulfur compound metabolic process;vitamin metabolic process	5: Vitamins	NA
SPCC1235.04c	nucleobase-containing small molecule metabolic process	6: Other metabolism	NA
SPCC1235.10c	vesicle-mediated transport	6: Other metabolism	NA
SPCC1235.11	transmembrane transport	6: Other metabolism	NA
SPCC1235.13	transmembrane transport	6: Other metabolism	NA
SPCC1235.14	transmembrane transport	6: Other metabolism	NA
SPCC1235.15	lipid metabolic process	4: Lipids	NA
SPCC1259.01c;SPBC16D10.11c	translation	0: Translation/RiBi	NA
SPCC1259.05c	generation of precursor metabolites and energy;oxidative phosphorylation	2: Precursors/Energy	OXPHOS
SPCC1259.09c	nucleobase-containing small molecule metabolic process;sulfur compound metabolic process	6: Other metabolism	NA
SPCC1259.11c	vesicle-mediated transport	6: Other metabolism	NA
SPCC126.08c	vesicle-mediated transport	6: Other metabolism	NA
SPCC126.09	transmembrane transport	6: Other metabolism	NA
SPCC126.10	nucleobase-containing small molecule metabolic process;sulfur compound metabolic process	6: Other metabolism	NA
SPCC1281.01	carbohydrate metabolic process	6: Other metabolism	NA
SPCC1281.06c	lipid metabolic process	4: Lipids	NA
SPCC132.04c	cellular amino acid metabolic process	3: Amino acids	NA
SPCC1322.04	nucleobase-containing small molecule metabolic process	6: Other metabolism	NA
SPCC1322.11;SPAC3G9.03	translation	0: Translation/RiBi	NA
SPCC1322.13	nucleobase-containing small molecule metabolic process	6: Other metabolism	NA
SPCC1322.14c	generation of precursor metabolites and energy	2: Precursors/Energy	Other
SPCC1393.03	translation	0: Translation/RiBi	NA
SPCC1393.06c	translation	0: Translation/RiBi	NA
SPCC1393.10	transmembrane transport	6: Other metabolism	NA
SPCC13B11.01	generation of precursor metabolites and energy	2: Precursors/Energy	Fermentation: Adh1
SPCC13B11.04c	cellular amino acid metabolic process;generation of precursor metabolites and energy	2: Precursors/Energy	Other
SPCC1442.03	transmembrane transport	6: Other metabolism	NA
SPCC1442.08c	generation of precursor metabolites and energy;oxidative phosphorylation	2: Precursors/Energy	OXPHOS
SPCC1442.09	cellular amino acid metabolic process	3: Amino acids	NA
SPCC1442.14c	nucleobase-containing small molecule metabolic process	6: Other metabolism	NA
SPCC1442.17c	vesicle-mediated transport	6: Other metabolism	NA
SPCC1450.03	translation	0: Translation/RiBi	NA
SPCC1450.04	translation	0: Translation/RiBi	NA
SPCC1450.06c	sulfur compound metabolic process	6: Other metabolism	NA
SPCC1450.07c	cellular amino acid metabolic process	3: Amino acids	NA
SPCC1450.13c	vitamin metabolic process	5: Vitamins	NA
SPCC1450.15	lipid metabolic process	4: Lipids	NA
SPCC1494.04c	cellular amino acid metabolic process	3: Amino acids	NA
SPCC1494.06c	translation	0: Translation/RiBi	NA
SPCC14G10.01	nucleobase-containing small molecule metabolic process	6: Other metabolism	NA
SPCC14G10.02	translation	0: Translation/RiBi	NA
SPCC162.06c	vesicle-mediated transport	6: Other metabolism	NA
SPCC162.07	vesicle-mediated transport	6: Other metabolism	NA
SPCC162.09c	lipid metabolic process;nucleobase-containing small molecule metabolic process;sulfur compound metabolic process	4: Lipids	NA
SPCC162.11c	nucleobase-containing small molecule metabolic process	6: Other metabolism	NA
SPCC1620.01c	translation	0: Translation/RiBi	NA
SPCC1620.05	vesicle-mediated transport	6: Other metabolism	NA
SPCC1620.06c	nucleobase-containing small molecule metabolic process	6: Other metabolism	NA
SPCC1620.08	generation of precursor metabolites and energy;nucleobase-containing small molecule metabolic process;sulfur compound metabolic process;tricarboxylic acid cycle	2: Precursors/Energy	TCA cycle
SPCC1620.12c	vesicle-mediated transport	6: Other metabolism	NA
SPCC1672.03c	nucleobase-containing small molecule metabolic process	6: Other metabolism	NA
SPCC1672.05c	cellular amino acid metabolic process	3: Amino acids	NA
SPCC1672.06c	carbohydrate metabolic process	6: Other metabolism	NA
SPCC1672.07	translation	0: Translation/RiBi	NA
SPCC1672.09	lipid metabolic process	4: Lipids	NA
SPCC1672.11c	transmembrane transport	6: Other metabolism	NA
SPCC1682.01	generation of precursor metabolites and energy;oxidative phosphorylation	2: Precursors/Energy	OXPHOS
SPCC1682.09c	transmembrane transport	6: Other metabolism	NA
SPCC1682.11c	transmembrane transport	6: Other metabolism	NA
SPCC1682.14	translation	0: Translation/RiBi	NA
SPCC16A11.02	translation	0: Translation/RiBi	NA
SPCC16A11.06c	lipid metabolic process	4: Lipids	NA
SPCC16A11.07	generation of precursor metabolites and energy	2: Precursors/Energy	Other
SPCC16A11.09c	transmembrane transport	6: Other metabolism	NA
SPCC16A11.10c	lipid metabolic process	4: Lipids	NA
SPCC16C4.08c	translation	0: Translation/RiBi	NA
SPCC16C4.10	generation of precursor metabolites and energy	2: Precursors/Energy	Other
SPCC1739.06c	sulfur compound metabolic process;tetrapyrrole metabolic process	6: Other metabolism	NA
SPCC1739.07	translation	0: Translation/RiBi	NA
SPCC1739.09c	generation of precursor metabolites and energy;oxidative phosphorylation	2: Precursors/Energy	OXPHOS
SPCC1739.10	vesicle-mediated transport	6: Other metabolism	NA
SPCC1753.04	carbohydrate metabolic process;sulfur compound metabolic process	6: Other metabolism	NA
SPCC1795.02c	transmembrane transport	6: Other metabolism	NA
SPCC1795.03	transmembrane transport	6: Other metabolism	NA
SPCC1795.05c	nucleobase-containing small molecule metabolic process	6: Other metabolism	NA
SPCC1795.10c	vesicle-mediated transport	6: Other metabolism	NA
SPCC1795.11	translation	0: Translation/RiBi	NA
SPCC18.05c	translation	0: Translation/RiBi	NA
SPCC18.08	cellular amino acid metabolic process	3: Amino acids	NA
SPCC18.10	vitamin metabolic process	5: Vitamins	NA
SPCC18.12c	translation	0: Translation/RiBi	NA
SPCC18.14c	translation	0: Translation/RiBi	NA
SPCC18.15	vesicle-mediated transport	6: Other metabolism	NA
SPCC18.16c	nucleobase-containing small molecule metabolic process;vitamin metabolic process	5: Vitamins	NA
SPCC18.18c	generation of precursor metabolites and energy;tricarboxylic acid cycle	2: Precursors/Energy	TCA cycle
SPCC1827.01c	translation	0: Translation/RiBi	NA
SPCC1827.02c	lipid metabolic process	4: Lipids	NA
SPCC1827.03c	lipid metabolic process;nucleobase-containing small molecule metabolic process;sulfur compound metabolic process	4: Lipids	NA
SPCC1827.05c	translation	0: Translation/RiBi	NA
SPCC1827.06c	cellular amino acid metabolic process;sulfur compound metabolic process	3: Amino acids	NA
SPCC1840.02c	carbohydrate metabolic process	6: Other metabolism	NA
SPCC1840.05c	carbohydrate metabolic process	6: Other metabolism	NA
SPCC1840.06	generation of precursor metabolites and energy;nucleobase-containing small molecule metabolic process;transmembrane transport;oxidative phosphorylation	2: Precursors/Energy	OXPHOS
SPCC1840.07c	generation of precursor metabolites and energy	2: Precursors/Energy	Other
SPCC1840.10	translation	0: Translation/RiBi	NA
SPCC1840.11	translation	0: Translation/RiBi	NA
SPCC188.06c	transmembrane transport	6: Other metabolism	NA
SPCC18B5.01c	transmembrane transport	6: Other metabolism	NA
SPCC18B5.05c	sulfur compound metabolic process;vitamin metabolic process	5: Vitamins	NA
SPCC18B5.06	translation	0: Translation/RiBi	NA
SPCC18B5.08c	cellular amino acid metabolic process	3: Amino acids	NA
SPCC1906.01	nucleobase-containing small molecule metabolic process	6: Other metabolism	NA
SPCC191.02c	nucleobase-containing small molecule metabolic process;sulfur compound metabolic process	6: Other metabolism	NA
SPCC191.05c	nucleobase-containing small molecule metabolic process	6: Other metabolism	NA
SPCC191.07	generation of precursor metabolites and energy;oxidative phosphorylation	2: Precursors/Energy	OXPHOS
SPCC1919.02	lipid metabolic process	4: Lipids	NA
SPCC1919.09	translation	0: Translation/RiBi	NA
SPCC23B6.01c	vesicle-mediated transport	6: Other metabolism	NA
SPCC23B6.02c	translation	0: Translation/RiBi	NA
SPCC24B10.09	translation	0: Translation/RiBi	NA
SPCC24B10.17	vesicle-mediated transport	6: Other metabolism	NA
SPCC24B10.21	carbohydrate metabolic process;generation of precursor metabolites and energy;nucleobase-containing small molecule metabolic process;canonical glycolysis	1: Glycolysis	NA
SPCC285.03	translation	0: Translation/RiBi	NA
SPCC285.04	nucleobase-containing small molecule metabolic process	6: Other metabolism	NA
SPCC285.05	nucleobase-containing small molecule metabolic process;transmembrane transport	6: Other metabolism	NA
SPCC285.08	vesicle-mediated transport	6: Other metabolism	NA
SPCC285.09c	nucleobase-containing small molecule metabolic process	6: Other metabolism	NA
SPCC285.12	translation	0: Translation/RiBi	NA
SPCC285.14	vesicle-mediated transport	6: Other metabolism	NA
SPCC285.15c;SPAC25G10.06	translation	0: Translation/RiBi	NA
SPCC306.02c	vesicle-mediated transport	6: Other metabolism	NA
SPCC306.06c	carbohydrate metabolic process	6: Other metabolism	NA
SPCC306.07c	translation	0: Translation/RiBi	NA
SPCC306.08c	generation of precursor metabolites and energy;tricarboxylic acid cycle	2: Precursors/Energy	TCA cycle
SPCC31H12.04c;SPCC16C4.13c	translation	0: Translation/RiBi	NA
SPCC31H12.07	vesicle-mediated transport	6: Other metabolism	NA
SPCC320.05	transmembrane transport	6: Other metabolism	NA
SPCC320.08	transmembrane transport	6: Other metabolism	NA
SPCC320.09	tetrapyrrole metabolic process	6: Other metabolism	NA
SPCC320.11c	translation	0: Translation/RiBi	NA
SPCC320.14	cellular amino acid metabolic process	3: Amino acids	NA
SPCC330.03c	tetrapyrrole metabolic process	6: Other metabolism	NA
SPCC330.05c	nucleobase-containing small molecule metabolic process	6: Other metabolism	NA
SPCC330.08	lipid metabolic process	4: Lipids	NA
SPCC330.09	translation	0: Translation/RiBi	NA
SPCC330.12c	generation of precursor metabolites and energy;oxidative phosphorylation	2: Precursors/Energy	OXPHOS
SPCC330.14c;SPAC6G9.09c	translation	0: Translation/RiBi	NA
SPCC338.10c	generation of precursor metabolites and energy;oxidative phosphorylation	2: Precursors/Energy	OXPHOS
SPCC338.13	vesicle-mediated transport	6: Other metabolism	NA
SPCC338.14	nucleobase-containing small molecule metabolic process	6: Other metabolism	NA
SPCC364.03	translation	0: Translation/RiBi	NA
SPCC364.04c	vesicle-mediated transport	6: Other metabolism	NA
SPCC364.05	vesicle-mediated transport	6: Other metabolism	NA
SPCC364.07	cellular amino acid metabolic process	3: Amino acids	NA
SPCC417.08	translation	0: Translation/RiBi	NA
SPCC417.10	transmembrane transport	6: Other metabolism	NA
SPCC417.11c	tetrapyrrole metabolic process	6: Other metabolism	NA
SPCC4B3.01	cellular amino acid metabolic process;sulfur compound metabolic process	3: Amino acids	NA
SPCC4B3.02c	vesicle-mediated transport	6: Other metabolism	NA
SPCC4B3.04c	lipid metabolic process	4: Lipids	NA
SPCC4B3.05c	tetrapyrrole metabolic process	6: Other metabolism	NA
SPCC4B3.10c	carbohydrate metabolic process	6: Other metabolism	NA
SPCC4B3.18	nucleobase-containing small molecule metabolic process;sulfur compound metabolic process;vitamin metabolic process	5: Vitamins	NA
SPCC4G3.02	nucleobase-containing small molecule metabolic process	6: Other metabolism	NA
SPCC4G3.16	vitamin metabolic process	5: Vitamins	NA
SPCC4G3.17	nucleobase-containing small molecule metabolic process	6: Other metabolism	NA
SPCC4G3.18	translation	0: Translation/RiBi	NA
SPCC548.06c	transmembrane transport	6: Other metabolism	NA
SPCC550.06c	transmembrane transport	6: Other metabolism	NA
SPCC550.15c	translation	0: Translation/RiBi	NA
SPCC553.02	nucleobase-containing small molecule metabolic process	6: Other metabolism	NA
SPCC553.08c	translation	0: Translation/RiBi	NA
SPCC569.05c	transmembrane transport	6: Other metabolism	NA
SPCC569.07	cellular amino acid metabolic process	3: Amino acids	NA
SPCC569.08c	nucleobase-containing small molecule metabolic process	6: Other metabolism	NA
SPCC576.01c	nucleobase-containing small molecule metabolic process	6: Other metabolism	NA
SPCC576.05	translation	0: Translation/RiBi	NA
SPCC576.07	vesicle-mediated transport	6: Other metabolism	NA
SPCC576.08c	translation	0: Translation/RiBi	NA
SPCC576.09	translation	0: Translation/RiBi	NA
SPCC576.11	translation	0: Translation/RiBi	NA
SPCC584.01c	sulfur compound metabolic process	6: Other metabolism	NA
SPCC584.04;REV__SPCC584.04	translation	0: Translation/RiBi	NA
SPCC584.05	vesicle-mediated transport	6: Other metabolism	NA
SPCC584.15c	vesicle-mediated transport	6: Other metabolism	NA
SPCC594.06c	vesicle-mediated transport	6: Other metabolism	NA
SPCC5E4.05c	lipid metabolic process	4: Lipids	NA
SPCC5E4.07	translation	0: Translation/RiBi	NA
SPCC61.01c	transmembrane transport	6: Other metabolism	NA
SPCC61.03	nucleobase-containing small molecule metabolic process	6: Other metabolism	NA
SPCC61.04c	vesicle-mediated transport	6: Other metabolism	NA
SPCC613.01	transmembrane transport	6: Other metabolism	NA
SPCC613.05c	translation	0: Translation/RiBi	NA
SPCC613.06	translation	0: Translation/RiBi	NA
SPCC613.07	translation	0: Translation/RiBi	NA
SPCC613.08	translation	0: Translation/RiBi	NA
SPCC613.10	generation of precursor metabolites and energy;oxidative phosphorylation	2: Precursors/Energy	OXPHOS
SPCC622.10c	vesicle-mediated transport	6: Other metabolism	NA
SPCC622.12c	cellular amino acid metabolic process	3: Amino acids	NA
SPCC622.14	vesicle-mediated transport	6: Other metabolism	NA
SPCC622.18	translation	0: Translation/RiBi	NA
SPCC645.03c	sulfur compound metabolic process	6: Other metabolism	NA
SPCC663.03	transmembrane transport	6: Other metabolism	NA
SPCC663.04	translation	0: Translation/RiBi	NA
SPCC70.03c	cellular amino acid metabolic process	3: Amino acids	NA
SPCC70.06	translation	0: Translation/RiBi	NA
SPCC70.07c	nucleobase-containing small molecule metabolic process	6: Other metabolism	NA
SPCC736.03c	cellular amino acid metabolic process	3: Amino acids	NA
SPCC736.06	cellular amino acid metabolic process	3: Amino acids	NA
SPCC736.07c	translation	0: Translation/RiBi	NA
SPCC736.15	vesicle-mediated transport	6: Other metabolism	NA
SPCC737.02c	generation of precursor metabolites and energy;oxidative phosphorylation	2: Precursors/Energy	OXPHOS
SPCC737.06c	cellular amino acid metabolic process;sulfur compound metabolic process	3: Amino acids	NA
SPCC737.08	translation	0: Translation/RiBi	NA
SPCC737.09c	transmembrane transport	6: Other metabolism	NA
SPCC74.01	vesicle-mediated transport	6: Other metabolism	NA
SPCC74.05	translation	0: Translation/RiBi	NA
SPCC757.05c	sulfur compound metabolic process	6: Other metabolism	NA
SPCC757.08	translation	0: Translation/RiBi	NA
SPCC757.13	transmembrane transport	6: Other metabolism	NA
SPCC777.04	transmembrane transport	6: Other metabolism	NA
SPCC777.09c	cellular amino acid metabolic process	3: Amino acids	NA
SPCC777.13	vesicle-mediated transport	6: Other metabolism	NA
SPCC790.02	vesicle-mediated transport	6: Other metabolism	NA
SPCC794.01c	carbohydrate metabolic process;generation of precursor metabolites and energy	2: Precursors/Energy	Other
SPCC794.03	transmembrane transport	6: Other metabolism	NA
SPCC794.04c	transmembrane transport	6: Other metabolism	NA
SPCC794.06	transmembrane transport	6: Other metabolism	NA
SPCC794.07	nucleobase-containing small molecule metabolic process;sulfur compound metabolic process	6: Other metabolism	NA
SPCC794.09c	translation	0: Translation/RiBi	NA
SPCC794.10	nucleobase-containing small molecule metabolic process	6: Other metabolism	NA
SPCC794.11c	vesicle-mediated transport	6: Other metabolism	NA
SPCC794.12c;SPAC750.08c	cellular amino acid metabolic process;generation of precursor metabolites and energy;tricarboxylic acid cycle	2: Precursors/Energy	TCA cycle
SPCC825.01	translation	0: Translation/RiBi	NA
SPCC825.03c	vesicle-mediated transport	6: Other metabolism	NA
SPCC830.03	translation	0: Translation/RiBi	NA
SPCC830.07c	translation	0: Translation/RiBi	NA
SPCC830.10	nucleobase-containing small molecule metabolic process	6: Other metabolism	NA
SPCC830.11c	translation	0: Translation/RiBi	NA
SPCC962.04	translation	0: Translation/RiBi	NA
SPCC965.03	transmembrane transport	6: Other metabolism	NA
SPCC965.06	transmembrane transport	6: Other metabolism	NA
SPCC965.08c	cellular amino acid metabolic process	3: Amino acids	NA
SPCC965.11c	transmembrane transport	6: Other metabolism	NA
SPCC965.13	transmembrane transport	6: Other metabolism	NA
SPCC965.14c	nucleobase-containing small molecule metabolic process	6: Other metabolism	NA
SPCC970.05;SPBC405.07	translation	0: Translation/RiBi	NA
SPCC970.06	vesicle-mediated transport	6: Other metabolism	NA
SPCC970.09	vesicle-mediated transport	6: Other metabolism	NA
SPCP1E11.05c	lipid metabolic process	4: Lipids	NA
SPCP1E11.06	vesicle-mediated transport	6: Other metabolism	NA
SPCP1E11.08	translation	0: Translation/RiBi	NA
SPCP1E11.09c	translation	0: Translation/RiBi	NA
SPCP1E11.11	translation	0: Translation/RiBi	NA
SPCP31B10.04	vesicle-mediated transport	6: Other metabolism	NA
SPCP31B10.07;SPAC513.01c	translation	0: Translation/RiBi	NA
SPCP31B10.08c	translation	0: Translation/RiBi	NA
SPCPB16A4.03c	nucleobase-containing small molecule metabolic process	6: Other metabolism	NA
SPCPB16A4.05c	nitrogen cycle metabolic process	6: Other metabolism	NA
SPCPB1C11.01	transmembrane transport	6: Other metabolism	NA
SPCPB1C11.02	transmembrane transport	6: Other metabolism	NA
SPCPB1C11.03	transmembrane transport	6: Other metabolism	NA
SPCPJ732.01	vesicle-mediated transport	6: Other metabolism	NA
SPCPJ732.02c	carbohydrate metabolic process	6: Other metabolism	NA
SPMIT.01	generation of precursor metabolites and energy;transmembrane transport;oxidative phosphorylation	2: Precursors/Energy	OXPHOS
SPMIT.05	generation of precursor metabolites and energy;oxidative phosphorylation	2: Precursors/Energy	OXPHOS
SPMIT.11	generation of precursor metabolites and energy;oxidative phosphorylation	2: Precursors/Energy	OXPHOS
TableS16. Assignment of metabolic proteins to non-overlapping functional classes. PomBaseIDs: proteomics protein group identifier; annotations: all relevant GO-slim annotations present for the protein group (semi-colon-separated); class: assignment to broad non-overlapping groups (Figs 5B and S5.1); subclass: for Precursors/Energy class, subdivision into non-overlapping subgroups (Figs 5C and S5.…
