# Supplementary material for: Growth-rate-dependent and nutrient-specific gene expression resource allocation in fission yeast
Source: Life Sci Alliance. 2022 Feb 28;5(5):e202101223. doi: 10.26508/lsa.202101223 (PMC8886410; doi:10.26508/lsa.202101223)
Supplement: Supplementary file 18 [file LSA-2021-01223_TableS18.xlsx]

## Sheet: TableS18
PomBaseID	cluster	medium	baseMean	log2FoldChange	lfcSE	pvalue	padj
SPBC1861.02	R1	Trp	908.549	-0.103416	0.169858	0.426317	0.821754
SPBC1861.02	R1	Gly	908.549	-0.0548591	0.121958	0.377863	0.999108
SPBC1861.02	R1	Phe	908.549	2.28767	0.210472	7.64411e-29	5.37599e-26
SPBC1861.02	R1	Ser	908.549	0.422012	0.210193	0.0119265	0.0599126
SPBC1861.02	R1	Ile	908.549	-1.48398	0.219149	1.12314e-12	3.14161e-11
SPBC1861.02	R1	Pro	908.549	0.128423	0.169605	0.0744272	0.376978
SPBC1861.02	R1	Glu	908.549	-0.644911	0.214756	0.000625521	0.00244594
SPBC1861.02	R1	Amm	908.549	0.0668489	0.163417	0.586775	0.790556
SPBP23A10.11c	R1	Trp	21201.9	-1.24644	0.239585	1.19938e-08	2.98209e-07
SPBP23A10.11c	R1	Gly	21201.9	0.0562341	0.126451	0.351278	0.999108
SPBP23A10.11c	R1	Phe	21201.9	1.60853	0.237482	6.58942e-13	8.76748e-11
SPBP23A10.11c	R1	Ser	21201.9	-0.0575727	0.185048	0.68848	0.883272
SPBP23A10.11c	R1	Ile	21201.9	-1.7207	0.236606	2.16909e-14	7.41558e-13
SPBP23A10.11c	R1	Pro	21201.9	0.0226181	0.109983	0.657633	0.953845
SPBP23A10.11c	R1	Glu	21201.9	-1.74792	0.236256	9.42457e-15	1.98278e-13
SPBP23A10.11c	R1	Amm	21201.9	0.742099	0.246445	0.000215155	0.00177422
SPAC1142.05	R1	Trp	1814.33	-1.08367	0.215737	3.46358e-08	8.11962e-07
SPAC1142.05	R1	Gly	1814.33	0.00830829	0.111499	0.86418	0.999108
SPAC1142.05	R1	Phe	1814.33	0.987676	0.216865	2.68538e-07	1.24718e-05
SPAC1142.05	R1	Ser	1814.33	0.0873734	0.174366	0.537618	0.796019
SPAC1142.05	R1	Ile	1814.33	-0.274286	0.195795	0.0847831	0.168331
SPAC1142.05	R1	Pro	1814.33	0.363363	0.258579	0.00742742	0.087873
SPAC1142.05	R1	Glu	1814.33	-0.649252	0.21262	0.000581921	0.00229183
SPAC1142.05	R1	Amm	1814.33	0.389262	0.214981	0.0137849	0.0593782
SPBC418.01c	R1	Trp	14135.2	-1.0556	0.170795	4.97807e-11	1.67856e-09
SPBC418.01c	R1	Gly	14135.2	0.159993	0.157069	0.0768588	0.572524
SPBC418.01c	R1	Phe	14135.2	0.54597	0.176936	0.000216339	0.00384971
SPBC418.01c	R1	Ser	14135.2	-0.303285	0.162212	0.0325791	0.129344
SPBC418.01c	R1	Ile	14135.2	-0.0949863	0.150462	0.472269	0.610829
SPBC418.01c	R1	Pro	14135.2	0.135037	0.148239	0.0889259	0.417475
SPBC418.01c	R1	Glu	14135.2	-0.981534	0.169857	9.59325e-10	1.10088e-08
SPBC418.01c	R1	Amm	14135.2	0.0802846	0.141232	0.506597	0.736338
SPAC11D3.04c	R1	Trp	997.478	-0.924939	0.147364	2.6978e-11	9.353e-10
SPAC11D3.04c	R1	Gly	997.478	0.009607	0.0967638	0.875184	0.999108
SPAC11D3.04c	R1	Phe	997.478	0.572773	0.146818	8.12732e-06	0.00024249
SPAC11D3.04c	R1	Ser	997.478	0.0205664	0.128327	0.860669	0.952078
SPAC11D3.04c	R1	Ile	997.478	-0.357485	0.140936	0.00497611	0.0167907
SPAC11D3.04c	R1	Pro	997.478	0.539432	0.148896	1.74447e-05	0.000679079
SPAC11D3.04c	R1	Glu	997.478	-1.01338	0.144243	2.72148e-13	4.92568e-12
SPAC11D3.04c	R1	Amm	997.478	0.101439	0.126175	0.347498	0.601192
SPBC11B10.02c	R1	Trp	8604.04	-0.785306	0.148055	1.11141e-08	2.79157e-07
SPBC11B10.02c	R1	Gly	8604.04	0.161977	0.138558	0.0534468	0.465491
SPBC11B10.02c	R1	Phe	8604.04	0.611356	0.150398	3.78128e-06	0.000126634
SPBC11B10.02c	R1	Ser	8604.04	-0.168279	0.135391	0.167711	0.415941
SPBC11B10.02c	R1	Ile	8604.04	-0.225593	0.138439	0.0697779	0.144944
SPBC11B10.02c	R1	Pro	8604.04	0.320723	0.159655	0.00360605	0.0514982
SPBC11B10.02c	R1	Glu	8604.04	-0.734552	0.146102	1.16955e-07	9.6768e-07
SPBC11B10.02c	R1	Amm	8604.04	0.116764	0.129491	0.287604	0.534898
SPCC1840.07c	R1	Trp	1971.74	-0.815501	0.18157	5.82001e-07	1.03064e-05
SPCC1840.07c	R1	Gly	1971.74	0.242192	0.193266	0.0228084	0.26608
SPCC1840.07c	R1	Phe	1971.74	0.588658	0.185888	0.000116929	0.00233061
SPCC1840.07c	R1	Ser	1971.74	-0.253956	0.166574	0.0688078	0.223591
SPCC1840.07c	R1	Ile	1971.74	-0.275257	0.1679	0.0568021	0.123242
SPCC1840.07c	R1	Pro	1971.74	0.426283	0.197861	0.0018086	0.0303129
SPCC1840.07c	R1	Glu	1971.74	-1.08642	0.17883	1.61256e-10	2.09463e-09
SPCC1840.07c	R1	Amm	1971.74	0.156502	0.15523	0.19509	0.416671
SPBC1683.07	R1	Trp	673.866	-1.14041	0.260659	9.98608e-07	1.71893e-05
SPBC1683.07	R1	Gly	673.866	0.101362	0.157831	0.129232	0.735656
SPBC1683.07	R1	Phe	673.866	0.0912691	0.161852	0.309132	0.662761
SPBC1683.07	R1	Ser	673.866	-0.342934	0.240676	0.050756	0.178735
SPBC1683.07	R1	Ile	673.866	-0.404397	0.246735	0.0289871	0.0715306
SPBC1683.07	R1	Pro	673.866	0.221032	0.323121	0.0232083	0.191903
SPBC1683.07	R1	Glu	673.866	-1.23905	0.258717	1.79177e-07	1.43662e-06
SPBC1683.07	R1	Amm	673.866	0.399108	0.260417	0.0203428	0.0794491
SPCC794.07	R1	Trp	18225.4	-0.57632	0.185651	0.0002555	0.00255137
SPCC794.07	R1	Gly	18225.4	0.1166	0.143004	0.138391	0.750783
SPCC794.07	R1	Phe	18225.4	0.305689	0.188883	0.0157299	0.11114
SPCC794.07	R1	Ser	18225.4	-0.215209	0.166257	0.121551	0.332073
SPCC794.07	R1	Ile	18225.4	-0.245575	0.168925	0.088555	0.174382
SPCC794.07	R1	Pro	18225.4	0.17953	0.18432	0.039312	0.257825
SPCC794.07	R1	Glu	18225.4	-1.37359	0.181884	3.67322e-15	8.33329e-14
SPCC794.07	R1	Amm	18225.4	0.158994	0.158096	0.198687	0.422157
SPAC6F6.11c	R1	Trp	1757.16	-0.73111	0.203157	3.03333e-05	0.00037932
SPAC6F6.11c	R1	Gly	1757.16	0.067203	0.123408	0.293469	0.999108
SPAC6F6.11c	R1	Phe	1757.16	0.305853	0.207117	0.0193093	0.128269
SPAC6F6.11c	R1	Ser	1757.16	-0.0829709	0.166016	0.547173	0.801317
SPAC6F6.11c	R1	Ile	1757.16	-0.541315	0.198995	0.00137374	0.00560308
SPAC6F6.11c	R1	Pro	1757.16	0.18154	0.20273	0.0393945	0.257966
SPAC6F6.11c	R1	Glu	1757.16	-1.15139	0.199885	8.67413e-10	1.01673e-08
SPAC6F6.11c	R1	Amm	1757.16	0.213421	0.178554	0.109425	0.27894
SPBC215.08c	R1	Trp	38575.5	-0.939153	0.181902	2.30121e-08	5.52626e-07
SPBC215.08c	R1	Gly	38575.5	0.150653	0.160581	0.0749853	0.56736
SPBC215.08c	R1	Phe	38575.5	0.366461	0.19022	0.00634188	0.0566625
SPBC215.08c	R1	Ser	38575.5	-0.250134	0.167581	0.074493	0.236292
SPBC215.08c	R1	Ile	38575.5	-0.567797	0.180309	0.000343855	0.00166778
SPBC215.08c	R1	Pro	38575.5	0.235942	0.202669	0.0209473	0.179277
SPBC215.08c	R1	Glu	38575.5	-1.22449	0.180027	9.931e-13	1.67433e-11
SPBC215.08c	R1	Amm	38575.5	0.190601	0.160966	0.132043	0.317659
SPBPB2B2.06c	R1	Trp	7096.06	-1.39554	0.917073	0.00290177	0.020437
SPBPB2B2.06c	R1	Gly	7096.06	-0.0232431	0.132134	0.33555	0.999108
SPBPB2B2.06c	R1	Phe	7096.06	0.0380425	0.173575	0.386164	0.730624
SPBPB2B2.06c	R1	Ser	7096.06	0.095918	0.290872	0.399227	0.69131
SPBPB2B2.06c	R1	Ile	7096.06	-0.0263421	0.290574	0.802304	0.874998
SPBPB2B2.06c	R1	Pro	7096.06	0.0239584	0.123247	0.257631	0.715527
SPBPB2B2.06c	R1	Glu	7096.06	-1.72132	0.800713	0.0011534	0.0042597
SPBPB2B2.06c	R1	Amm	7096.06	0.232905	0.408361	0.0199737	0.0783511
SPCC1393.10	R1	Trp	1191.99	-1.01739	0.275533	1.47248e-05	0.000199148
SPCC1393.10	R1	Gly	1191.99	0.118621	0.177263	0.092395	0.621394
SPCC1393.10	R1	Phe	1191.99	-0.00451579	0.144289	0.92957	0.97993
SPCC1393.10	R1	Ser	1191.99	0.196608	0.220872	0.225472	0.501351
SPCC1393.10	R1	Ile	1191.99	-0.521744	0.268616	0.00964993	0.029181
SPCC1393.10	R1	Pro	1191.99	0.365857	0.388054	0.0101781	0.109177
SPCC1393.10	R1	Glu	1191.99	-1.51511	0.270903	1.67853e-09	1.85694e-08
SPCC1393.10	R1	Amm	1191.99	0.0936716	0.188589	0.436915	0.683825
SPBC1683.03c	R1	Trp	8637.57	-0.760755	0.149855	3.89756e-08	9.0083e-07
SPBC1683.03c	R1	Gly	8637.57	0.125932	0.127988	0.113972	0.687567
SPBC1683.03c	R1	Phe	8637.57	-0.0864255	0.119914	0.363188	0.714618
SPBC1683.03c	R1	Ser	8637.57	0.332495	0.144329	0.00921635	0.0490509
SPBC1683.03c	R1	Ile	8637.57	-0.144709	0.136788	0.249817	0.382035
SPBC1683.03c	R1	Pro	8637.57	0.0384633	0.0978713	0.543685	0.919275
SPBC1683.03c	R1	Glu	8637.57	-1.10426	0.148526	1.16894e-14	2.42814e-13
SPBC1683.03c	R1	Amm	8637.57	0.524097	0.150419	7.57234e-05	0.0007047
SPAC4H3.05	R1	Trp	861.456	-0.68656	0.11986	1.2216e-09	3.6448e-08
SPAC4H3.05	R1	Gly	861.456	-0.000635076	0.0871583	0.989341	0.999108
SPAC4H3.05	R1	Phe	861.456	0.091429	0.102334	0.336931	0.687035
SPAC4H3.05	R1	Ser	861.456	0.307478	0.114332	0.00347602	0.0223109
SPAC4H3.05	R1	Ile	861.456	-0.629215	0.119474	2.60741e-08	3.38688e-07
SPAC4H3.05	R1	Pro	861.456	0.0167646	0.0847369	0.78463	0.978999
SPAC4H3.05	R1	Glu	861.456	-1.17589	0.119684	8.7537e-24	4.22495e-22
SPAC4H3.05	R1	Amm	861.456	0.0862763	0.107519	0.411437	0.661497
SPBC17A3.04c	R1	Trp	7417.94	-0.723726	0.0992633	5.12238e-14	2.71156e-12
SPBC17A3.04c	R1	Gly	7417.94	0.0394764	0.0805726	0.562382	0.999108
SPBC17A3.04c	R1	Phe	7417.94	0.01163	0.0855447	0.905627	0.972608
SPBC17A3.04c	R1	Ser	7417.94	0.0287889	0.0933889	0.782689	0.925339
SPBC17A3.04c	R1	Ile	7417.94	-0.61976	0.0989681	7.79777e-11	1.5733e-09
SPBC17A3.04c	R1	Pro	7417.94	0.0797462	0.0846109	0.203921	0.653169
SPBC17A3.04c	R1	Glu	7417.94	-1.11109	0.0988568	5.7912e-30	4.4547e-28
SPBC17A3.04c	R1	Amm	7417.94	0.396397	0.098738	1.39443e-05	0.000165816
SPBPB8B6.05c	R1	Trp	603.6	-0.724423	0.228206	0.000135044	0.00142056
SPBPB8B6.05c	R1	Gly	603.6	0.000102637	0.112195	0.977908	0.999108
SPBPB8B6.05c	R1	Phe	603.6	0.279952	0.225224	0.0304129	0.174299
SPBPB8B6.05c	R1	Ser	603.6	0.769961	0.221072	5.68893e-05	0.000601
SPBPB8B6.05c	R1	Ile	603.6	-0.713071	0.223458	0.00019052	0.00099674
SPBPB8B6.05c	R1	Pro	603.6	0.00198297	0.105823	0.971562	0.995261
SPBPB8B6.05c	R1	Glu	603.6	-1.11621	0.220535	3.98501e-08	3.5412e-07
SPBPB8B6.05c	R1	Amm	603.6	0.400288	0.220102	0.0129562	0.0563958
SPAC683.02c	R1	Trp	787.56	-0.669462	0.137851	1.57826e-07	3.14566e-06
SPAC683.02c	R1	Gly	787.56	-0.00631613	0.0935934	0.922206	0.999108
SPAC683.02c	R1	Phe	787.56	0.252744	0.132962	0.0139904	0.102201
SPAC683.02c	R1	Ser	787.56	0.243491	0.127705	0.0345325	0.134967
SPAC683.02c	R1	Ile	787.56	-1.0822	0.137653	3.51247e-16	1.58641e-14
SPAC683.02c	R1	Pro	787.56	0.0200492	0.0905152	0.730423	0.972763
SPAC683.02c	R1	Glu	787.56	-0.936384	0.134719	5.42993e-13	9.3467e-12
SPAC683.02c	R1	Amm	787.56	0.5435	0.134108	6.60008e-06	8.758e-05
SPBC1711.07	R1	Trp	4122.21	-0.825078	0.0846437	1.4934e-23	1.79318e-21
SPBC1711.07	R1	Gly	4122.21	0.0537531	0.0725683	0.370919	0.999108
SPBC1711.07	R1	Phe	4122.21	0.183275	0.0813577	0.0111485	0.0869797
SPBC1711.07	R1	Ser	4122.21	0.202511	0.0813703	0.00955589	0.0504729
SPBC1711.07	R1	Ile	4122.21	-0.677372	0.0839846	1.05548e-16	5.0448e-15
SPBC1711.07	R1	Pro	4122.21	-0.0407967	0.0702482	0.519309	0.905662
SPBC1711.07	R1	Glu	4122.21	-0.846546	0.0834336	4.3502e-25	2.35341e-23
SPBC1711.07	R1	Amm	4122.21	0.670847	0.0832614	1.17653e-16	1.37906e-14
SPBC4C3.03	R1	Trp	1466.56	-1.21582	0.173741	1.8666e-13	9.00911e-12
SPBC4C3.03	R1	Gly	1466.56	0.0571786	0.112897	0.407204	0.999108
SPBC4C3.03	R1	Phe	1466.56	0.0908201	0.132514	0.320793	0.672157
SPBC4C3.03	R1	Ser	1466.56	-0.0454158	0.147986	0.732261	0.904258
SPBC4C3.03	R1	Ile	1466.56	-0.562572	0.17268	0.000240953	0.00122669
SPBC4C3.03	R1	Pro	1466.56	0.0513208	0.107534	0.40604	0.840822
SPBC4C3.03	R1	Glu	1466.56	-0.393476	0.166977	0.00892925	0.025395
SPBC4C3.03	R1	Amm	1466.56	0.664098	0.175419	1.59903e-05	0.000185224
SPCC338.11c	R1	Trp	1154.47	-1.2069	0.185092	4.92044e-12	1.92249e-10
SPCC338.11c	R1	Gly	1154.47	0.139899	0.155638	0.0841368	0.594874
SPCC338.11c	R1	Phe	1154.47	0.00971784	0.124618	0.879061	0.962743
SPCC338.11c	R1	Ser	1154.47	-0.0501668	0.154536	0.696542	0.888018
SPCC338.11c	R1	Ile	1154.47	-0.910375	0.184624	8.96508e-08	1.05334e-06
SPCC338.11c	R1	Pro	1154.47	0.259121	0.208118	0.0159512	0.14772
SPCC338.11c	R1	Glu	1154.47	-0.570269	0.18026	0.000428909	0.0017465
SPCC338.11c	R1	Amm	1154.47	0.786777	0.184319	1.83242e-06	2.68482e-05
SPAC1F12.04c	R1	Trp	1265.49	-0.765566	0.135702	1.75347e-09	5.07784e-08
SPAC1F12.04c	R1	Gly	1265.49	0.0225883	0.0942663	0.75152	0.999108
SPAC1F12.04c	R1	Phe	1265.49	0.0509649	0.107591	0.554578	0.834154
SPAC1F12.04c	R1	Ser	1265.49	0.0435775	0.121251	0.688074	0.883272
SPAC1F12.04c	R1	Ile	1265.49	-0.824893	0.135485	1.53873e-10	2.97066e-09
SPAC1F12.04c	R1	Pro	1265.49	0.280846	0.143025	0.00505768	0.0673908
SPAC1F12.04c	R1	Glu	1265.49	-0.851883	0.134472	3.78929e-11	5.35796e-10
SPAC1F12.04c	R1	Amm	1265.49	0.0628593	0.117913	0.544768	0.762551
SPAC922.05c	R1	Trp	1501.45	-0.891309	0.196385	5.08484e-07	9.16948e-06
SPAC922.05c	R1	Gly	1501.45	0.148425	0.16776	0.0734889	0.561825
SPAC922.05c	R1	Phe	1501.45	0.123265	0.151503	0.19672	0.537044
SPAC922.05c	R1	Ser	1501.45	-0.0378056	0.160675	0.772774	0.922175
SPAC922.05c	R1	Ile	1501.45	-0.981131	0.195413	5.2362e-08	6.44445e-07
SPAC922.05c	R1	Pro	1501.45	0.342617	0.226189	0.00769903	0.0899836
SPAC922.05c	R1	Glu	1501.45	-0.977829	0.194279	6.18246e-08	5.33969e-07
SPAC922.05c	R1	Amm	1501.45	0.256965	0.181069	0.0616023	0.187434
SPAC222.08c	R1	Trp	6163.86	-1.53881	0.202652	1.47203e-15	8.83755e-14
SPAC222.08c	R1	Gly	6163.86	0.0524173	0.118873	0.379592	0.999108
SPAC222.08c	R1	Phe	6163.86	0.22309	0.193375	0.0538348	0.251689
SPAC222.08c	R1	Ser	6163.86	0.0576018	0.167045	0.690886	0.88447
SPAC222.08c	R1	Ile	6163.86	-0.885444	0.204732	1.68713e-06	1.53526e-05
SPAC222.08c	R1	Pro	6163.86	0.083274	0.130175	0.185109	0.622228
SPAC222.08c	R1	Glu	6163.86	-1.24343	0.20289	9.23747e-11	1.24252e-09
SPAC222.08c	R1	Amm	6163.86	0.0448241	0.155462	0.709487	0.865842
SPBC56F2.09c	R1	Trp	14261	-1.17073	0.167526	1.66961e-13	8.13809e-12
SPBC56F2.09c	R1	Gly	14261	0.205319	0.171161	0.0335201	0.341655
SPBC56F2.09c	R1	Phe	14261	0.4943	0.174484	0.000392831	0.00636815
SPBC56F2.09c	R1	Ser	14261	-0.313318	0.160615	0.0183826	0.0834077
SPBC56F2.09c	R1	Ile	14261	-0.568093	0.16695	0.000143503	0.000784964
SPBC56F2.09c	R1	Pro	14261	0.357604	0.18633	0.00355201	0.050877
SPBC56F2.09c	R1	Glu	14261	-0.919206	0.16718	3.60347e-09	3.78249e-08
SPBC56F2.09c	R1	Amm	14261	0.196314	0.151904	0.101622	0.265635
SPAC11D3.02c	R1	Trp	3971.85	-1.31085	0.143175	3.44486e-21	2.97527e-19
SPAC11D3.02c	R1	Gly	3971.85	0.0740606	0.107498	0.292809	0.999108
SPAC11D3.02c	R1	Phe	3971.85	0.386194	0.147088	0.00133446	0.0172621
SPAC11D3.02c	R1	Ser	3971.85	-0.110586	0.129671	0.333183	0.625814
SPAC11D3.02c	R1	Ile	3971.85	-0.722274	0.143272	6.69881e-08	8.04347e-07
SPAC11D3.02c	R1	Pro	3971.85	0.1856	0.144415	0.0317442	0.228487
SPAC11D3.02c	R1	Glu	3971.85	-0.581546	0.141561	1.11524e-05	6.44404e-05
SPAC11D3.02c	R1	Amm	3971.85	0.110605	0.126155	0.31674	0.569092
SPAC31G5.04	R1	Trp	11403.8	-1.08409	0.136755	1.1753e-16	7.41798e-15
SPAC31G5.04	R1	Gly	11403.8	0.0660844	0.102669	0.344224	0.999108
SPAC31G5.04	R1	Phe	11403.8	0.370946	0.140147	0.00133295	0.0172621
SPAC31G5.04	R1	Ser	11403.8	-0.0845636	0.12385	0.499833	0.769683
SPAC31G5.04	R1	Ile	11403.8	-0.546806	0.135715	1.56029e-05	0.000112136
SPAC31G5.04	R1	Pro	11403.8	0.0918152	0.108935	0.183356	0.618069
SPAC31G5.04	R1	Glu	11403.8	-0.719469	0.135595	3.4583e-08	3.11817e-07
SPAC31G5.04	R1	Amm	11403.8	0.168239	0.125557	0.108207	0.277118
SPCC1020.09	R1	Trp	385.932	-0.160297	0.192523	0.242661	0.604871
SPCC1020.09	R1	Gly	385.932	0.0624107	0.12906	0.285674	0.996227
SPCC1020.09	R1	Phe	385.932	-1.43839	0.246949	2.48827e-10	2.07623e-08
SPCC1020.09	R1	Ser	385.932	0.671218	0.240207	0.000655751	0.00542565
SPCC1020.09	R1	Ile	385.932	-1.98095	0.246693	5.11829e-17	2.51973e-15
SPCC1020.09	R1	Pro	385.932	0.183675	0.246543	0.0334391	0.235292
SPCC1020.09	R1	Glu	385.932	-1.37844	0.239839	7.93955e-10	9.37324e-09
SPCC1020.09	R1	Amm	385.932	0.155495	0.189414	0.237606	0.47396
SPAC3H5.05c	R1	Trp	10669	-0.943669	0.142789	3.18886e-12	1.29742e-10
SPAC3H5.05c	R1	Gly	10669	0.196602	0.142674	0.0314024	0.328923
SPAC3H5.05c	R1	Phe	10669	0.159259	0.12891	0.097515	0.365347
SPAC3H5.05c	R1	Ser	10669	-0.116402	0.129386	0.315435	0.607278
SPAC3H5.05c	R1	Ile	10669	-1.67921	0.141625	1.29887e-33	3.36544e-31
SPAC3H5.05c	R1	Pro	10669	0.200324	0.146913	0.0256126	0.201684
SPAC3H5.05c	R1	Glu	10669	-2.20058	0.141346	7.09606e-56	2.32893e-53
SPAC3H5.05c	R1	Amm	10669	0.532165	0.143361	3.14603e-05	0.00032953
SPAC105.02c	R1	Trp	2645.54	-0.0951917	0.151733	0.438347	0.830951
SPAC105.02c	R1	Gly	2645.54	0.0593094	0.116451	0.372442	0.999108
SPAC105.02c	R1	Phe	2645.54	-0.0305015	0.126125	0.737744	0.91858
SPAC105.02c	R1	Ser	2645.54	0.0826368	0.156098	0.515675	0.780648
SPAC105.02c	R1	Ile	2645.54	-1.36041	0.183395	1.06793e-14	3.80972e-13
SPAC105.02c	R1	Pro	2645.54	0.0217055	0.102391	0.705519	0.967998
SPAC105.02c	R1	Glu	2645.54	-1.61228	0.181845	1.33323e-19	4.62216e-18
SPAC105.02c	R1	Amm	2645.54	0.108119	0.151452	0.363224	0.617112
SPAC9G1.15c	R1	Trp	245.631	0.00913653	0.114213	0.915028	0.991731
SPAC9G1.15c	R1	Gly	245.631	0.00283825	0.0917255	0.947912	0.999108
SPAC9G1.15c	R1	Phe	245.631	-0.0159005	0.103642	0.860506	0.959194
SPAC9G1.15c	R1	Ser	245.631	0.0745227	0.118378	0.490961	0.762412
SPAC9G1.15c	R1	Ile	245.631	-1.34813	0.144577	8.43046e-22	6.3851e-20
SPAC9G1.15c	R1	Pro	245.631	0.156711	0.123438	0.0494819	0.295605
SPAC9G1.15c	R1	Glu	245.631	-1.61107	0.140417	2.20998e-31	1.90846e-29
SPAC9G1.15c	R1	Amm	245.631	0.051199	0.115736	0.615226	0.811564
SPAC25B8.05	R1	Trp	1064.58	-0.0193431	0.101249	0.839234	0.989358
SPAC25B8.05	R1	Gly	1064.58	0.00102525	0.0844821	0.978301	0.999108
SPAC25B8.05	R1	Phe	1064.58	0.015256	0.0931784	0.849787	0.953396
SPAC25B8.05	R1	Ser	1064.58	0.102074	0.104187	0.305431	0.597347
SPAC25B8.05	R1	Ile	1064.58	-1.15506	0.114052	3.97211e-25	4.0739e-23
SPAC25B8.05	R1	Pro	1064.58	0.00449918	0.0815651	0.924948	0.992374
SPAC25B8.05	R1	Glu	1064.58	-1.77495	0.114052	3.42654e-56	1.20492e-53
SPAC25B8.05	R1	Amm	1064.58	0.163268	0.104617	0.0860427	0.237039
SPBC26H8.06	R1	Trp	6277.4	-0.245609	0.116035	0.0200653	0.097705
SPBC26H8.06	R1	Gly	6277.4	0.0481651	0.0920997	0.460829	0.999108
SPBC26H8.06	R1	Phe	6277.4	0.11109	0.106195	0.19144	0.530951
SPBC26H8.06	R1	Ser	6277.4	0.0334379	0.110668	0.718089	0.896845
SPBC26H8.06	R1	Ile	6277.4	-1.32363	0.120515	3.61318e-29	5.55865e-27
SPBC26H8.06	R1	Pro	6277.4	0.0488223	0.0899185	0.427081	0.85718
SPBC26H8.06	R1	Glu	6277.4	-1.70725	0.120274	7.07203e-47	1.45065e-44
SPBC26H8.06	R1	Amm	6277.4	0.212761	0.114879	0.0361472	0.126567
SPAC30C2.06c	R1	Trp	1451.67	-0.0295074	0.0973762	0.716289	0.971842
SPAC30C2.06c	R1	Gly	1451.67	0.0556247	0.0860223	0.376369	0.999108
SPAC30C2.06c	R1	Phe	1451.67	-0.0236069	0.0904023	0.719628	0.91493
SPAC30C2.06c	R1	Ser	1451.67	0.0306915	0.0993496	0.753398	0.914816
SPAC30C2.06c	R1	Ile	1451.67	-1.79524	0.110758	2.91311e-60	7.17062e-57
SPAC30C2.06c	R1	Pro	1451.67	0.157404	0.103338	0.0337781	0.235617
SPAC30C2.06c	R1	Glu	1451.67	-1.78801	0.109435	4.07694e-61	1.82462e-58
SPAC30C2.06c	R1	Amm	1451.67	0.225991	0.103257	0.0146409	0.0621355
SPAC688.02c	R1	Trp	577.198	-0.10373	0.0912268	0.225884	0.580552
SPAC688.02c	R1	Gly	577.198	0.0869432	0.0844829	0.19197	0.866769
SPAC688.02c	R1	Phe	577.198	0.25253	0.0957065	0.00244212	0.02783
SPAC688.02c	R1	Ser	577.198	-0.10865	0.0929457	0.221331	0.496859
SPAC688.02c	R1	Ile	577.198	-1.3814	0.10606	7.94065e-40	4.88648e-37
SPAC688.02c	R1	Pro	577.198	0.408834	0.0982718	2.78147e-06	0.000142832
SPAC688.02c	R1	Glu	577.198	-1.8983	0.107693	6.45445e-71	3.97191e-68
SPAC688.02c	R1	Amm	577.198	0.169365	0.0943833	0.0507915	0.163536
SPAPB1E7.04c	R1	Trp	4267.29	-0.0707409	0.144804	0.538335	0.906369
SPAPB1E7.04c	R1	Gly	4267.29	0.045455	0.110124	0.504851	0.999108
SPAPB1E7.04c	R1	Phe	4267.29	0.106061	0.136975	0.258679	0.60932
SPAPB1E7.04c	R1	Ser	4267.29	-0.403717	0.17124	0.00527526	0.0312141
SPAPB1E7.04c	R1	Ile	4267.29	-0.90827	0.1749	2.22295e-08	2.90281e-07
SPAPB1E7.04c	R1	Pro	4267.29	0.218971	0.189573	0.0248401	0.198515
SPAPB1E7.04c	R1	Glu	4267.29	-2.10604	0.173172	3.21282e-35	3.59471e-33
SPAPB1E7.04c	R1	Amm	4267.29	0.116635	0.147109	0.330433	0.58393
SPAP8A3.11c	R1	Trp	965.729	-0.187505	0.112261	0.0583812	0.226844
SPAP8A3.11c	R1	Gly	965.729	0.10488	0.10202	0.151487	0.785886
SPAP8A3.11c	R1	Phe	965.729	-0.0297947	0.0977542	0.721223	0.915098
SPAP8A3.11c	R1	Ser	965.729	0.166284	0.111385	0.103015	0.296403
SPAP8A3.11c	R1	Ile	965.729	-1.72118	0.123552	3.40799e-45	3.3555e-42
SPAP8A3.11c	R1	Pro	965.729	0.0164081	0.0847373	0.784184	0.978999
SPAP8A3.11c	R1	Glu	965.729	-2.25426	0.123118	1.06686e-75	8.75361e-73
SPAP8A3.11c	R1	Amm	965.729	0.267508	0.114742	0.00839535	0.0397789
SPCC126.01c	R1	Trp	1013.21	0.0475008	0.093668	0.589858	0.937066
SPCC126.01c	R1	Gly	1013.21	-0.187797	0.101183	0.0164331	0.215159
SPCC126.01c	R1	Phe	1013.21	0.000496167	0.0870239	0.998402	0.999167
SPCC126.01c	R1	Ser	1013.21	0.0557432	0.0954052	0.53734	0.796019
SPCC126.01c	R1	Ile	1013.21	-1.52303	0.10636	1.36688e-47	1.68229e-44
SPCC126.01c	R1	Pro	1013.21	0.0756152	0.0851677	0.245202	0.695897
SPCC126.01c	R1	Glu	1013.21	-2.24477	0.107499	6.26097e-98	1.02743e-94
SPCC126.01c	R1	Amm	1013.21	0.0840748	0.0943081	0.334477	0.587461
SPAC144.13c	R1	Trp	626.961	0.16647	0.187809	0.22761	0.582998
SPAC144.13c	R1	Gly	626.961	-0.0233874	0.115272	0.686027	0.999108
SPAC144.13c	R1	Phe	626.961	0.00362025	0.136803	0.975732	0.993024
SPAC144.13c	R1	Ser	626.961	-0.0163289	0.178728	0.89007	0.966435
SPAC144.13c	R1	Ile	626.961	-1.40018	0.232572	1.1268e-10	2.21005e-09
SPAC144.13c	R1	Pro	626.961	0.120634	0.168421	0.0813376	0.398596
SPAC144.13c	R1	Glu	626.961	-2.02846	0.233944	3.11144e-19	1.00115e-17
SPAC144.13c	R1	Amm	626.961	0.531153	0.237901	0.00307478	0.0174592
SPAC1F8.07c	R1	Trp	319815	-0.0510394	0.134964	0.653264	0.961877
SPAC1F8.07c	R1	Gly	319815	0.00184789	0.100888	0.980038	0.999108
SPAC1F8.07c	R1	Phe	319815	0.0229968	0.117067	0.79286	0.93739
SPAC1F8.07c	R1	Ser	319815	0.0339448	0.1393	0.785248	0.926243
SPAC1F8.07c	R1	Ile	319815	-0.99097	0.159599	5.30156e-11	1.11537e-09
SPAC1F8.07c	R1	Pro	319815	0.0663621	0.109144	0.301568	0.759347
SPAC1F8.07c	R1	Glu	319815	-2.09831	0.158126	2.21103e-41	3.10997e-39
SPAC1F8.07c	R1	Amm	319815	0.217378	0.148217	0.072486	0.210779
SPBC18E5.05c	R1	Trp	747.389	-0.013207	0.147172	0.907859	0.991731
SPBC18E5.05c	R1	Gly	747.389	-0.0253582	0.108139	0.686424	0.999108
SPBC18E5.05c	R1	Phe	747.389	0.0885306	0.1367	0.334818	0.684798
SPBC18E5.05c	R1	Ser	747.389	0.0518486	0.154897	0.700104	0.889619
SPBC18E5.05c	R1	Ile	747.389	-1.19171	0.186451	1.34234e-11	3.19244e-10
SPBC18E5.05c	R1	Pro	747.389	0.0782956	0.121615	0.219436	0.671321
SPBC18E5.05c	R1	Glu	747.389	-2.15342	0.187479	6.74569e-32	6.26585e-30
SPBC18E5.05c	R1	Amm	747.389	0.284677	0.175281	0.0366632	0.128009
SPBC4F6.11c	R1	Trp	2138.75	-0.0108528	0.0593478	0.84338	0.989358
SPBC4F6.11c	R1	Gly	2138.75	-0.0418591	0.0561145	0.425489	0.999108
SPBC4F6.11c	R1	Phe	2138.75	0.116396	0.0590498	0.0379879	0.200659
SPBC4F6.11c	R1	Ser	2138.75	0.0753189	0.0597177	0.190492	0.453039
SPBC4F6.11c	R1	Ile	2138.75	-1.32398	0.0644181	1.01906e-94	5.01684e-91
SPBC4F6.11c	R1	Pro	2138.75	-0.00643371	0.0543623	0.934227	0.992374
SPBC4F6.11c	R1	Glu	2138.75	-2.1127	0.0652686	1.30379e-231	6.41854e-228
SPBC4F6.11c	R1	Amm	2138.75	0.198506	0.0601089	0.000616522	0.00446344
SPAC144.02	R1	Trp	957.166	0.0192286	0.0889085	0.808031	0.988168
SPAC144.02	R1	Gly	957.166	0.0196849	0.0773931	0.75451	0.999108
SPAC144.02	R1	Phe	957.166	-0.023401	0.0838457	0.759658	0.927282
SPAC144.02	R1	Ser	957.166	0.0157118	0.0907816	0.848766	0.949645
SPAC144.02	R1	Ile	957.166	-0.828966	0.0989279	7.22333e-18	3.99556e-16
SPAC144.02	R1	Pro	957.166	0.148152	0.0928459	0.0354299	0.243966
SPAC144.02	R1	Glu	957.166	-1.12289	0.0988764	8.94866e-31	7.22201e-29
SPAC144.02	R1	Amm	957.166	0.319787	0.096162	0.000316865	0.0025039
SPAC2G11.10c	R1	Trp	967.076	0.0147806	0.0925507	0.863664	0.989358
SPAC2G11.10c	R1	Gly	967.076	0.00742884	0.0793457	0.921038	0.999108
SPAC2G11.10c	R1	Phe	967.076	0.028852	0.0868536	0.703743	0.909325
SPAC2G11.10c	R1	Ser	967.076	0.00537278	0.0945449	0.953936	0.987063
SPAC2G11.10c	R1	Ile	967.076	-0.674699	0.102587	8.62981e-12	2.1032e-10
SPAC2G11.10c	R1	Pro	967.076	0.146538	0.096541	0.0412314	0.262565
SPAC2G11.10c	R1	Glu	967.076	-1.08365	0.102822	6.19184e-27	3.81031e-25
SPAC2G11.10c	R1	Amm	967.076	0.340916	0.100294	0.000224385	0.00184107
SPBC1105.06	R1	Trp	1043.9	-0.0420479	0.120138	0.689605	0.971842
SPBC1105.06	R1	Gly	1043.9	0.0288131	0.0959657	0.637511	0.999108
SPBC1105.06	R1	Phe	1043.9	0.11097	0.117007	0.206214	0.548264
SPBC1105.06	R1	Ser	1043.9	-0.0897808	0.124579	0.426569	0.715008
SPBC1105.06	R1	Ile	1043.9	-0.708768	0.138171	5.54458e-08	6.77319e-07
SPBC1105.06	R1	Pro	1043.9	0.0696082	0.1017	0.298685	0.758015
SPBC1105.06	R1	Glu	1043.9	-1.13678	0.137299	1.43236e-17	4.22245e-16
SPBC1105.06	R1	Amm	1043.9	0.290425	0.132789	0.0103174	0.0471175
SPBC16H5.05c	R1	Trp	2119.72	-0.149513	0.0914596	0.0755497	0.276656
SPBC16H5.05c	R1	Gly	2119.72	0.0585932	0.080589	0.349653	0.999108
SPBC16H5.05c	R1	Phe	2119.72	-0.000772158	0.0833573	0.998138	0.999167
SPBC16H5.05c	R1	Ser	2119.72	0.00533669	0.0906297	0.957318	0.987759
SPBC16H5.05c	R1	Ile	2119.72	-0.66901	0.0967023	8.20513e-13	2.40439e-11
SPBC16H5.05c	R1	Pro	2119.72	0.156936	0.0935759	0.0271368	0.210256
SPBC16H5.05c	R1	Glu	2119.72	-1.13528	0.0967623	7.2524e-33	7.28644e-31
SPBC16H5.05c	R1	Amm	2119.72	0.260575	0.0941271	0.00258046	0.0151183
SPAC23G3.12c	R1	Trp	4677.97	-0.0103079	0.0949192	0.900918	0.991731
SPAC23G3.12c	R1	Gly	4677.97	0.0187672	0.0811428	0.771722	0.999108
SPAC23G3.12c	R1	Phe	4677.97	-0.0358288	0.088788	0.611796	0.863495
SPAC23G3.12c	R1	Ser	4677.97	0.0787315	0.0971172	0.394435	0.686392
SPAC23G3.12c	R1	Ile	4677.97	-0.609387	0.103109	7.2868e-10	1.2587e-08
SPAC23G3.12c	R1	Pro	4677.97	-0.0100111	0.0783546	0.869726	0.989743
SPAC23G3.12c	R1	Glu	4677.97	-1.1307	0.102952	4.17503e-29	2.89488e-27
SPAC23G3.12c	R1	Amm	4677.97	0.313727	0.101671	0.00075345	0.00533703
SPCC569.08c	R1	Trp	3085.35	-0.0606647	0.0671003	0.332765	0.721118
SPCC569.08c	R1	Gly	3085.35	0.0894451	0.0647807	0.120016	0.7047
SPCC569.08c	R1	Phe	3085.35	-0.00290344	0.0643674	0.951405	0.983107
SPCC569.08c	R1	Ser	3085.35	0.0759035	0.0675278	0.264442	0.548147
SPCC569.08c	R1	Ile	3085.35	-0.697327	0.0703251	6.96203e-24	6.12037e-22
SPCC569.08c	R1	Pro	3085.35	0.0279041	0.0605902	0.609593	0.939959
SPCC569.08c	R1	Glu	3085.35	-0.955302	0.0697995	1.24818e-43	1.86206e-41
SPCC569.08c	R1	Amm	3085.35	0.405444	0.0690781	1.26395e-09	4.07335e-08
SPAC3C7.01c	R1	Trp	2361.54	0.0180445	0.0677363	0.808528	0.988168
SPAC3C7.01c	R1	Gly	2361.54	-0.00277204	0.0619736	0.957591	0.999108
SPAC3C7.01c	R1	Phe	2361.54	-0.268544	0.0711261	3.6562e-05	0.000849032
SPAC3C7.01c	R1	Ser	2361.54	0.0489558	0.0684252	0.490438	0.762314
SPAC3C7.01c	R1	Ile	2361.54	-0.740351	0.071827	5.70938e-26	5.98027e-24
SPAC3C7.01c	R1	Pro	2361.54	0.0663472	0.063625	0.235592	0.686718
SPAC3C7.01c	R1	Glu	2361.54	-1.00156	0.0712404	4.65926e-46	9.17501e-44
SPAC3C7.01c	R1	Amm	2361.54	0.166491	0.0689895	0.0129936	0.0565085
SPAC15F9.02	R1	Trp	2332.09	-0.0726103	0.0688481	0.277414	0.655176
SPAC15F9.02	R1	Gly	2332.09	0.0293819	0.0629924	0.57837	0.999108
SPAC15F9.02	R1	Phe	2332.09	0.00153099	0.0657658	0.968855	0.989986
SPAC15F9.02	R1	Ser	2332.09	0.138718	0.0693722	0.0391048	0.147859
SPAC15F9.02	R1	Ile	2332.09	-0.772459	0.0724737	2.1726e-27	2.67393e-25
SPAC15F9.02	R1	Pro	2332.09	0.0840964	0.0653094	0.125245	0.511469
SPAC15F9.02	R1	Glu	2332.09	-1.06868	0.0717177	3.30204e-51	9.03107e-49
SPAC15F9.02	R1	Amm	2332.09	0.0727368	0.0683117	0.262962	0.50648
SPCC965.03	R1	Trp	3968.17	-0.0120443	0.143103	0.912808	0.991731
SPCC965.03	R1	Gly	3968.17	0.0320544	0.107552	0.654535	0.999108
SPCC965.03	R1	Phe	3968.17	0.00709093	0.12233	0.944676	0.982862
SPCC965.03	R1	Ser	3968.17	0.0779658	0.151233	0.530306	0.790666
SPCC965.03	R1	Ile	3968.17	-0.757805	0.176637	3.47663e-06	2.89602e-05
SPCC965.03	R1	Pro	3968.17	0.152949	0.162669	0.0580613	0.324377
SPCC965.03	R1	Glu	3968.17	-1.12492	0.175418	1.67228e-11	2.47972e-10
SPCC965.03	R1	Amm	3968.17	0.0279957	0.141122	0.792777	0.906608
SPBC1105.11c	R1	Trp	13194.4	-0.0362297	0.144538	0.758821	0.981109
SPBC1105.11c	R1	Gly	13194.4	0.0370897	0.108914	0.568785	0.999108
SPBC1105.11c	R1	Phe	13194.4	0.0228324	0.123556	0.794734	0.93739
SPBC1105.11c	R1	Ser	13194.4	0.0507583	0.151113	0.698421	0.888686
SPBC1105.11c	R1	Ile	13194.4	-0.675373	0.177638	2.32758e-05	0.000161163
SPBC1105.11c	R1	Pro	13194.4	0.0626272	0.112802	0.313156	0.768294
SPBC1105.11c	R1	Glu	13194.4	-1.00113	0.17679	1.83459e-09	1.99816e-08
SPBC1105.11c	R1	Amm	13194.4	0.0373263	0.142164	0.747565	0.887127
SPCC1494.07	R1	Trp	3661.93	0.000646896	0.109888	0.981162	0.997804
SPCC1494.07	R1	Gly	3661.93	-0.0191479	0.0900161	0.778353	0.999108
SPCC1494.07	R1	Phe	3661.93	0.0638475	0.102766	0.444588	0.774125
SPCC1494.07	R1	Ser	3661.93	0.0189283	0.112754	0.847014	0.948447
SPCC1494.07	R1	Ile	3661.93	-0.672441	0.12342	8.16358e-09	1.15819e-07
SPCC1494.07	R1	Pro	3661.93	0.0655844	0.0947549	0.347859	0.800396
SPCC1494.07	R1	Glu	3661.93	-1.03681	0.123064	4.38001e-18	1.3393e-16
SPCC1494.07	R1	Amm	3661.93	0.14442	0.113654	0.14859	0.346829
SPAC644.14c	R1	Trp	1749.05	0.0356754	0.161146	0.781316	0.982297
SPAC644.14c	R1	Gly	1749.05	-0.0693686	0.127186	0.28615	0.996264
SPAC644.14c	R1	Phe	1749.05	0.0281946	0.134006	0.755487	0.92496
SPAC644.14c	R1	Ser	1749.05	0.135519	0.177066	0.350934	0.641191
SPAC644.14c	R1	Ile	1749.05	-0.5773	0.210928	0.00145076	0.005859
SPAC644.14c	R1	Pro	1749.05	0.0362344	0.109899	0.512431	0.905662
SPAC644.14c	R1	Glu	1749.05	-0.974087	0.210618	4.66491e-07	3.50082e-06
SPAC644.14c	R1	Amm	1749.05	0.0333036	0.157728	0.79272	0.906608
SPBC902.04	R1	Trp	2939.58	-0.0157358	0.0621081	0.802582	0.986831
SPBC902.04	R1	Gly	2939.58	0.0359883	0.0581575	0.460888	0.999108
SPBC902.04	R1	Phe	2939.58	-0.0448318	0.0605178	0.427267	0.760186
SPBC902.04	R1	Ser	2939.58	0.107223	0.0627157	0.0774545	0.241762
SPBC902.04	R1	Ile	2939.58	-0.568019	0.0649331	5.32328e-19	3.40344e-17
SPBC902.04	R1	Pro	2939.58	0.0529485	0.0581046	0.285499	0.746932
SPBC902.04	R1	Glu	2939.58	-1.03581	0.0649179	1.25271e-58	5.13924e-56
SPBC902.04	R1	Amm	2939.58	0.104129	0.062431	0.0811716	0.227031
SPBC2F12.03c	R1	Trp	2739.4	-0.132082	0.189819	0.315885	0.699444
SPBC2F12.03c	R1	Gly	2739.4	0.0684852	0.133501	0.264651	0.977403
SPBC2F12.03c	R1	Phe	2739.4	-0.025849	0.141608	0.715869	0.913356
SPBC2F12.03c	R1	Ser	2739.4	0.193196	0.206523	0.222134	0.498208
SPBC2F12.03c	R1	Ile	2739.4	-0.822879	0.24945	0.000106248	0.000610335
SPBC2F12.03c	R1	Pro	2739.4	0.01688	0.109682	0.735197	0.972763
SPBC2F12.03c	R1	Glu	2739.4	-0.857617	0.246507	6.96614e-05	0.000341917
SPBC2F12.03c	R1	Amm	2739.4	0.30228	0.232191	0.04934	0.160323
SPCC736.10c	R1	Trp	1192.41	-0.112865	0.088815	0.168854	0.481336
SPCC736.10c	R1	Gly	1192.41	0.0552864	0.0788024	0.399012	0.999108
SPCC736.10c	R1	Phe	1192.41	0.010332	0.0818169	0.895717	0.96872
SPCC736.10c	R1	Ser	1192.41	0.130749	0.0891489	0.117153	0.323286
SPCC736.10c	R1	Ile	1192.41	-0.73777	0.0949502	1.53224e-15	6.33882e-14
SPCC736.10c	R1	Pro	1192.41	0.00154054	0.0734421	0.99249	0.998667
SPCC736.10c	R1	Glu	1192.41	-0.8332	0.0930491	7.18778e-20	2.54571e-18
SPCC736.10c	R1	Amm	1192.41	0.231106	0.0903404	0.00529012	0.0273564
SPAC29E6.08	R1	Trp	7641.96	-0.137088	0.183654	0.30422	0.685739
SPAC29E6.08	R1	Gly	7641.96	0.00960099	0.113933	0.886917	0.999108
SPAC29E6.08	R1	Phe	7641.96	0.00141816	0.137268	0.989231	0.998152
SPAC29E6.08	R1	Ser	7641.96	0.0250594	0.179957	0.865959	0.954879
SPAC29E6.08	R1	Ile	7641.96	-0.668554	0.233077	0.000613812	0.00276215
SPAC29E6.08	R1	Pro	7641.96	0.0244387	0.109599	0.550108	0.920931
SPAC29E6.08	R1	Glu	7641.96	-0.895698	0.231322	1.44677e-05	8.1773e-05
SPAC29E6.08	R1	Amm	7641.96	0.168531	0.189458	0.212089	0.442796
SPBC887.13c	R1	Trp	1402.77	-0.123507	0.0819618	0.0946013	0.327472
SPBC887.13c	R1	Gly	1402.77	0.102147	0.0783029	0.117861	0.696556
SPBC887.13c	R1	Phe	1402.77	-0.0112286	0.0765189	0.838574	0.951057
SPBC887.13c	R1	Ser	1402.77	0.0318024	0.0818286	0.712882	0.893689
SPBC887.13c	R1	Ile	1402.77	-0.719778	0.0873224	2.47862e-17	1.27107e-15
SPBC887.13c	R1	Pro	1402.77	0.0723604	0.0747691	0.235072	0.685616
SPBC887.13c	R1	Glu	1402.77	-0.763386	0.0860973	1.66236e-19	5.5296e-18
SPBC887.13c	R1	Amm	1402.77	0.126361	0.0822891	0.119025	0.295258
SPBC30B4.08	R1	Trp	753.262	-0.0531902	0.0949362	0.540423	0.906505
SPBC30B4.08	R1	Gly	753.262	-0.0243636	0.0812568	0.694088	0.999108
SPBC30B4.08	R1	Phe	753.262	0.168332	0.0973994	0.0414247	0.212464
SPBC30B4.08	R1	Ser	753.262	0.119949	0.0970704	0.190484	0.453039
SPBC30B4.08	R1	Ile	753.262	-0.697681	0.105133	6.02519e-12	1.51337e-10
SPBC30B4.08	R1	Pro	753.262	0.0426174	0.0806518	0.496187	0.894196
SPBC30B4.08	R1	Glu	753.262	-0.915558	0.10373	1.41557e-19	4.84502e-18
SPBC30B4.08	R1	Amm	753.262	0.0905357	0.095436	0.301919	0.551317
SPBC6B1.08c	R1	Trp	2852.77	-0.0445978	0.0675316	0.512351	0.88564
SPBC6B1.08c	R1	Gly	2852.77	-0.0104665	0.0617576	0.858938	0.999108
SPBC6B1.08c	R1	Phe	2852.77	0.23677	0.0694576	0.000231006	0.00406158
SPBC6B1.08c	R1	Ser	2852.77	0.121943	0.0681246	0.0666158	0.218779
SPBC6B1.08c	R1	Ile	2852.77	-0.808711	0.0710595	6.35564e-31	1.3037e-28
SPBC6B1.08c	R1	Pro	2852.77	0.00259288	0.0602867	0.968207	0.995261
SPBC6B1.08c	R1	Glu	2852.77	-0.871599	0.0699629	1.90079e-36	2.228e-34
SPBC6B1.08c	R1	Amm	2852.77	0.222275	0.0685573	0.000708582	0.00507027
SPAP8A3.14c	R1	Trp	994.754	-0.0184431	0.0763976	0.841734	0.989358
SPAP8A3.14c	R1	Gly	994.754	-0.0934415	0.0740955	0.136958	0.750783
SPAP8A3.14c	R1	Phe	994.754	0.0911252	0.0748249	0.160641	0.484989
SPAP8A3.14c	R1	Ser	994.754	0.0512481	0.0773642	0.466964	0.745299
SPAP8A3.14c	R1	Ile	994.754	-0.66358	0.0828437	2.79038e-16	1.27195e-14
SPAP8A3.14c	R1	Pro	994.754	0.0769999	0.0715811	0.176275	0.607541
SPAP8A3.14c	R1	Glu	994.754	-0.960034	0.0817653	2.2138e-32	2.09587e-30
SPAP8A3.14c	R1	Amm	994.754	0.240689	0.0791345	0.00108133	0.00733456
SPBC342.06c	R1	Trp	658.281	-0.0295	0.114967	0.776164	0.982297
SPBC342.06c	R1	Gly	658.281	-0.0692593	0.100632	0.317907	0.999108
SPBC342.06c	R1	Phe	658.281	0.167459	0.120185	0.0700198	0.301318
SPBC342.06c	R1	Ser	658.281	0.0227689	0.117912	0.824046	0.939886
SPBC342.06c	R1	Ile	658.281	-0.585354	0.131456	2.06637e-06	1.84959e-05
SPBC342.06c	R1	Pro	658.281	0.102229	0.108342	0.148494	0.560421
SPBC342.06c	R1	Glu	658.281	-1.08242	0.131222	2.37636e-17	6.88165e-16
SPBC342.06c	R1	Amm	658.281	0.18473	0.121257	0.0782311	0.221213
SPAC2C4.12c	R1	Trp	1158.69	-0.142786	0.0917719	0.100718	0.339505
SPAC2C4.12c	R1	Gly	1158.69	0.0260713	0.0779373	0.656146	0.999108
SPAC2C4.12c	R1	Phe	1158.69	0.14899	0.0905937	0.0515833	0.242545
SPAC2C4.12c	R1	Ser	1158.69	-0.0262981	0.0908591	0.753427	0.914816
SPAC2C4.12c	R1	Ile	1158.69	-0.707037	0.0975967	8.12814e-14	2.5816e-12
SPAC2C4.12c	R1	Pro	1158.69	0.079533	0.0822843	0.20186	0.650019
SPAC2C4.12c	R1	Glu	1158.69	-0.925685	0.0962268	1.48859e-22	6.60212e-21
SPAC2C4.12c	R1	Amm	1158.69	0.275849	0.0938185	0.00148687	0.00951868
SPBC30D10.17c	R1	Trp	6316.16	0.0100655	0.113733	0.937855	0.994033
SPBC30D10.17c	R1	Gly	6316.16	-0.0027079	0.0913806	0.939164	0.999108
SPBC30D10.17c	R1	Phe	6316.16	0.0644162	0.105942	0.407853	0.748598
SPBC30D10.17c	R1	Ser	6316.16	-0.0660179	0.117469	0.537982	0.796058
SPBC30D10.17c	R1	Ile	6316.16	-0.696839	0.128726	9.64948e-09	1.34573e-07
SPBC30D10.17c	R1	Pro	6316.16	0.155235	0.123447	0.0494752	0.295605
SPBC30D10.17c	R1	Glu	6316.16	-0.937338	0.128292	4.51541e-14	8.82117e-13
SPBC30D10.17c	R1	Amm	6316.16	0.294475	0.125798	0.00663862	0.0328792
SPBC12C2.13c	R1	Trp	1882.67	-0.144278	0.189831	0.295869	0.675586
SPBC12C2.13c	R1	Gly	1882.67	0.0105717	0.115075	0.853274	0.999108
SPBC12C2.13c	R1	Phe	1882.67	0.0578762	0.146704	0.478776	0.793289
SPBC12C2.13c	R1	Ser	1882.67	0.0946853	0.189191	0.505145	0.772377
SPBC12C2.13c	R1	Ile	1882.67	-0.512671	0.239143	0.00676214	0.0216309
SPBC12C2.13c	R1	Pro	1882.67	0.0276187	0.11128	0.546548	0.919275
SPBC12C2.13c	R1	Glu	1882.67	-1.18075	0.240904	9.51102e-08	7.93606e-07
SPBC12C2.13c	R1	Amm	1882.67	0.0785668	0.174744	0.523683	0.749935
SPAC4H3.10c	R1	Trp	128281	0.00448594	0.118969	0.968104	0.997804
SPAC4H3.10c	R1	Gly	128281	-0.0119887	0.0943209	0.853498	0.999108
SPAC4H3.10c	R1	Phe	128281	-0.0277749	0.106945	0.739487	0.919317
SPAC4H3.10c	R1	Ser	128281	0.222136	0.12886	0.0556641	0.191222
SPAC4H3.10c	R1	Ile	128281	-0.554972	0.135549	9.94095e-06	7.41438e-05
SPAC4H3.10c	R1	Pro	128281	0.0271328	0.0918845	0.640659	0.945996
SPAC4H3.10c	R1	Glu	128281	-1.34764	0.135414	2.21543e-24	1.12439e-22
SPAC4H3.10c	R1	Amm	128281	0.186324	0.126607	0.0864912	0.237875
SPBC215.02	R1	Trp	1948.95	-0.0141857	0.135936	0.889788	0.990264
SPBC215.02	R1	Gly	1948.95	-0.0164602	0.102435	0.771616	0.999108
SPBC215.02	R1	Phe	1948.95	0.055234	0.121687	0.538601	0.827659
SPBC215.02	R1	Ser	1948.95	0.0939282	0.1434	0.45811	0.737741
SPBC215.02	R1	Ile	1948.95	-0.609324	0.163241	3.99854e-05	0.000256982
SPBC215.02	R1	Pro	1948.95	0.0324713	0.100162	0.58889	0.934385
SPBC215.02	R1	Glu	1948.95	-1.2949	0.16292	1.64584e-16	4.26447e-15
SPBC215.02	R1	Amm	1948.95	0.193132	0.148256	0.111478	0.282598
SPCC645.10	R1	Trp	1233.52	-0.00221571	0.0862783	0.974767	0.997804
SPCC645.10	R1	Gly	1233.52	-0.0428571	0.0771581	0.492817	0.999108
SPCC645.10	R1	Phe	1233.52	0.0694093	0.0828402	0.343476	0.69329
SPCC645.10	R1	Ser	1233.52	0.134638	0.088251	0.108965	0.308425
SPCC645.10	R1	Ile	1233.52	-0.643622	0.0934949	9.97694e-13	2.85561e-11
SPCC645.10	R1	Pro	1233.52	0.0661855	0.077962	0.277325	0.737142
SPCC645.10	R1	Glu	1233.52	-1.28437	0.0932839	3.94729e-44	6.47751e-42
SPCC645.10	R1	Amm	1233.52	0.195966	0.0887793	0.0172355	0.0701823
SPBC29A3.06	R1	Trp	3041.89	-0.240675	0.0985892	0.0087193	0.0499129
SPBC29A3.06	R1	Gly	3041.89	0.102645	0.0902333	0.164002	0.81371
SPBC29A3.06	R1	Phe	3041.89	0.105791	0.0918274	0.176829	0.508934
SPBC29A3.06	R1	Ser	3041.89	0.199404	0.0973806	0.0294327	0.119552
SPBC29A3.06	R1	Ile	3041.89	-0.678379	0.101429	6.24991e-12	1.56184e-10
SPBC29A3.06	R1	Pro	3041.89	-0.0547861	0.0817791	0.410134	0.843151
SPBC29A3.06	R1	Glu	3041.89	-1.18874	0.101154	1.74512e-32	1.68456e-30
SPBC29A3.06	R1	Amm	3041.89	0.289818	0.099342	0.00139042	0.0090066
SPBC428.15	R1	Trp	2275.59	-0.187645	0.0902559	0.0273337	0.125761
SPBC428.15	R1	Gly	2275.59	0.016596	0.0760139	0.768405	0.999108
SPBC428.15	R1	Phe	2275.59	0.0877505	0.0846307	0.226783	0.573314
SPBC428.15	R1	Ser	2275.59	0.0889579	0.0887664	0.283191	0.571138
SPBC428.15	R1	Ile	2275.59	-0.744946	0.0940203	3.57135e-16	1.59834e-14
SPBC428.15	R1	Pro	2275.59	0.00883348	0.0736305	0.864716	0.988763
SPBC428.15	R1	Glu	2275.59	-1.23122	0.0935971	1.66895e-40	2.2206e-38
SPBC428.15	R1	Amm	2275.59	0.213784	0.090235	0.0100782	0.0462825
SPBP23A10.13	R1	Trp	2791.78	-0.198031	0.0884388	0.0169965	0.0859624
SPBP23A10.13	R1	Gly	2791.78	-0.0148303	0.0748058	0.859374	0.999108
SPBP23A10.13	R1	Phe	2791.78	0.185789	0.088546	0.0164645	0.114322
SPBP23A10.13	R1	Ser	2791.78	0.177591	0.0881757	0.032645	0.129501
SPBP23A10.13	R1	Ile	2791.78	-0.734894	0.0921956	1.89614e-16	8.72403e-15
SPBP23A10.13	R1	Pro	2791.78	0.024711	0.0735299	0.63526	0.943819
SPBP23A10.13	R1	Glu	2791.78	-1.34478	0.0926026	9.7788e-49	2.29243e-46
SPBP23A10.13	R1	Amm	2791.78	0.132099	0.0874248	0.097152	0.257694
SPAC17A5.01	R1	Trp	1961.73	-0.221732	0.0924561	0.00956459	0.0536293
SPAC17A5.01	R1	Gly	1961.73	0.0332872	0.0777788	0.616435	0.999108
SPAC17A5.01	R1	Phe	1961.73	-0.0136827	0.082959	0.848327	0.952739
SPAC17A5.01	R1	Ser	1961.73	0.34137	0.0933872	0.000122267	0.00120867
SPAC17A5.01	R1	Ile	1961.73	-0.730695	0.0960823	4.22759e-15	1.5767e-13
SPAC17A5.01	R1	Pro	1961.73	0.0621846	0.0793987	0.322444	0.775145
SPAC17A5.01	R1	Glu	1961.73	-1.12478	0.0958987	8.13937e-33	8.01402e-31
SPAC17A5.01	R1	Amm	1961.73	0.100915	0.0895423	0.227065	0.462491
SPBC29A3.09c	R1	Trp	4545.91	-0.0980165	0.0513581	0.0482615	0.194115
SPBC29A3.09c	R1	Gly	4545.91	0.077678	0.049776	0.0983916	0.638184
SPBC29A3.09c	R1	Phe	4545.91	-0.0201386	0.0500485	0.661661	0.88755
SPBC29A3.09c	R1	Ser	4545.91	0.307031	0.0517207	1.32801e-09	3.47754e-08
SPBC29A3.09c	R1	Ile	4545.91	-0.670457	0.0530239	6.43804e-37	3.16945e-34
SPBC29A3.09c	R1	Pro	4545.91	0.0191708	0.047969	0.665303	0.95521
SPBC29A3.09c	R1	Glu	4545.91	-1.32768	0.0532025	4.24399e-138	1.04466e-134
SPBC29A3.09c	R1	Amm	4545.91	0.21778	0.0517862	1.50477e-05	0.000176801
SPAC23D3.09	R1	Trp	2080.94	-0.169836	0.0691286	0.0100685	0.0559447
SPAC23D3.09	R1	Gly	2080.94	0.0445918	0.0630006	0.427104	0.999108
SPAC23D3.09	R1	Phe	2080.94	0.100016	0.0668673	0.109855	0.385198
SPAC23D3.09	R1	Ser	2080.94	-0.0975079	0.0687961	0.141845	0.371044
SPAC23D3.09	R1	Ile	2080.94	-0.723401	0.0718026	9.39457e-25	8.72632e-23
SPAC23D3.09	R1	Pro	2080.94	0.0750545	0.0641068	0.17223	0.60354
SPAC23D3.09	R1	Glu	2080.94	-1.28588	0.0717261	4.01561e-73	2.82412e-70
SPAC23D3.09	R1	Amm	2080.94	0.151178	0.0686111	0.0218842	0.0841688
SPCC1840.08c	R1	Trp	980.609	-0.331161	0.18706	0.0228765	0.108394
SPCC1840.08c	R1	Gly	980.609	0.0439424	0.113857	0.490276	0.999108
SPCC1840.08c	R1	Phe	980.609	0.110847	0.146909	0.215011	0.558279
SPCC1840.08c	R1	Ser	980.609	-0.10881	0.163679	0.425556	0.715008
SPCC1840.08c	R1	Ile	980.609	-0.606518	0.193343	0.000327799	0.00161053
SPCC1840.08c	R1	Pro	980.609	0.239712	0.219444	0.0209229	0.179277
SPCC1840.08c	R1	Glu	980.609	-1.18362	0.192454	8.14074e-11	1.098e-09
SPCC1840.08c	R1	Amm	980.609	0.103657	0.155958	0.362493	0.616639
SPAC23A1.07	R1	Trp	764.372	-0.0805461	0.113766	0.420722	0.816081
SPAC23A1.07	R1	Gly	764.372	0.000185124	0.0904683	0.989647	0.999108
SPAC23A1.07	R1	Phe	764.372	0.0683786	0.105017	0.43994	0.771335
SPAC23A1.07	R1	Ser	764.372	0.0239801	0.1152	0.854769	0.951471
SPAC23A1.07	R1	Ile	764.372	-0.862465	0.128864	2.79989e-12	7.55941e-11
SPAC23A1.07	R1	Pro	764.372	0.0862125	0.101541	0.208768	0.657635
SPAC23A1.07	R1	Glu	764.372	-1.24627	0.128126	2.66119e-23	1.2244e-21
SPAC23A1.07	R1	Amm	764.372	0.113703	0.11462	0.266645	0.510379
SPAC9.12c	R1	Trp	649.943	0.013788	0.0773656	0.881228	0.989358
SPAC9.12c	R1	Gly	649.943	-0.0585883	0.0719916	0.323636	0.999108
SPAC9.12c	R1	Phe	649.943	0.0736022	0.0751053	0.289686	0.647944
SPAC9.12c	R1	Ser	649.943	0.0241026	0.0784107	0.754619	0.914816
SPAC9.12c	R1	Ile	649.943	-0.921324	0.0869469	3.32777e-27	3.90062e-25
SPAC9.12c	R1	Pro	649.943	0.0921642	0.0737216	0.123878	0.507175
SPAC9.12c	R1	Glu	649.943	-1.16788	0.0846126	2.05801e-44	3.71682e-42
SPAC9.12c	R1	Amm	649.943	0.202635	0.0796061	0.00727572	0.0354989
SPBC16H5.03c	R1	Trp	1582.81	0.0211038	0.0861558	0.788561	0.982297
SPBC16H5.03c	R1	Gly	1582.81	-0.104458	0.084048	0.116394	0.69037
SPBC16H5.03c	R1	Phe	1582.81	0.080398	0.0834941	0.271578	0.627038
SPBC16H5.03c	R1	Ser	1582.81	-0.017772	0.0876895	0.8358	0.944376
SPBC16H5.03c	R1	Ile	1582.81	-0.806226	0.0939322	1.308e-18	7.94974e-17
SPBC16H5.03c	R1	Pro	1582.81	0.1698	0.091242	0.0167709	0.153321
SPBC16H5.03c	R1	Glu	1582.81	-1.1395	0.0935975	4.6975e-35	5.13907e-33
SPBC16H5.03c	R1	Amm	1582.81	0.176257	0.0892173	0.0326764	0.116739
SPAC13D6.03c	R1	Trp	941.598	-0.118756	0.0737749	0.0884875	0.310716
SPAC13D6.03c	R1	Gly	941.598	0.0162982	0.0656199	0.803848	0.999108
SPAC13D6.03c	R1	Phe	941.598	0.181961	0.0734956	0.00717718	0.0623842
SPAC13D6.03c	R1	Ser	941.598	-0.00842136	0.0727779	0.903292	0.970464
SPAC13D6.03c	R1	Ile	941.598	-0.745987	0.0779014	1.44144e-22	1.16331e-20
SPAC13D6.03c	R1	Pro	941.598	0.10785	0.0697829	0.0647118	0.347418
SPAC13D6.03c	R1	Glu	941.598	-1.14811	0.0762283	3.04076e-52	8.80567e-50
SPAC13D6.03c	R1	Amm	941.598	0.0391663	0.0711376	0.55887	0.772625
SPBC354.04	R1	Trp	1362.94	-0.106453	0.0726611	0.136301	0.417152
SPBC354.04	R1	Gly	1362.94	-0.0710956	0.0681762	0.226854	0.922213
SPBC354.04	R1	Phe	1362.94	0.210069	0.0738145	0.00167811	0.0208095
SPBC354.04	R1	Ser	1362.94	0.0827743	0.0725451	0.230662	0.508076
SPBC354.04	R1	Ile	1362.94	-0.903676	0.0775857	3.72052e-32	8.32551e-30
SPBC354.04	R1	Pro	1362.94	0.0988268	0.069406	0.0799395	0.393703
SPBC354.04	R1	Glu	1362.94	-1.08878	0.0760926	3.67152e-47	7.85865e-45
SPBC354.04	R1	Amm	1362.94	0.0622368	0.0717193	0.347621	0.601192
SPBC725.05c	R1	Trp	3597.6	-0.131194	0.153608	0.283963	0.661842
SPBC725.05c	R1	Gly	3597.6	0.0288366	0.107907	0.638553	0.999108
SPBC725.05c	R1	Phe	3597.6	0.033535	0.125482	0.751515	0.923266
SPBC725.05c	R1	Ser	3597.6	0.037005	0.15229	0.788565	0.927543
SPBC725.05c	R1	Ile	3597.6	-0.973708	0.181	7.43519e-09	1.07028e-07
SPBC725.05c	R1	Pro	3597.6	0.126356	0.149285	0.0900962	0.419377
SPBC725.05c	R1	Glu	3597.6	-0.91936	0.180549	3.88544e-08	3.45896e-07
SPBC725.05c	R1	Amm	3597.6	0.240802	0.167888	0.0648482	0.194426
SPCC4G3.11	R1	Trp	741.934	-0.0656521	0.114805	0.484506	0.866195
SPCC4G3.11	R1	Gly	741.934	0.0369727	0.0937602	0.563516	0.999108
SPCC4G3.11	R1	Phe	741.934	0.0843393	0.108154	0.336211	0.686222
SPCC4G3.11	R1	Ser	741.934	-0.0440045	0.117261	0.685844	0.883015
SPCC4G3.11	R1	Ile	741.934	-1.02385	0.132207	9.14004e-16	3.84585e-14
SPCC4G3.11	R1	Pro	741.934	0.142173	0.119814	0.0705538	0.366986
SPCC4G3.11	R1	Glu	741.934	-1.01962	0.130483	6.70971e-16	1.61921e-14
SPCC4G3.11	R1	Amm	741.934	0.2056	0.122241	0.0474693	0.155794
SPBC19C7.01	R1	Trp	672.341	-0.0795972	0.128556	0.475979	0.859932
SPBC19C7.01	R1	Gly	672.341	0.0173594	0.0981744	0.793587	0.999108
SPBC19C7.01	R1	Phe	672.341	0.056128	0.114752	0.527684	0.821791
SPBC19C7.01	R1	Ser	672.341	0.11246	0.132763	0.345894	0.635624
SPBC19C7.01	R1	Ile	672.341	-1.09091	0.150771	4.2467e-14	1.40312e-12
SPBC19C7.01	R1	Pro	672.341	-0.00208661	0.0932156	0.973642	0.995261
SPBC19C7.01	R1	Glu	672.341	-0.875787	0.147752	4.49379e-10	5.52042e-09
SPBC19C7.01	R1	Amm	672.341	0.124857	0.130265	0.256884	0.499834
SPBC3D6.09	R1	Trp	848.415	-0.0576916	0.0774283	0.453631	0.842409
SPBC3D6.09	R1	Gly	848.415	0.0229595	0.0692282	0.684441	0.999108
SPBC3D6.09	R1	Phe	848.415	0.0172401	0.0734271	0.760516	0.927282
SPBC3D6.09	R1	Ser	848.415	0.0392709	0.0779934	0.588632	0.829193
SPBC3D6.09	R1	Ile	848.415	-0.948013	0.0854266	1.28774e-29	2.04501e-27
SPBC3D6.09	R1	Pro	848.415	0.0684656	0.0711278	0.238416	0.690011
SPBC3D6.09	R1	Glu	848.415	-0.888008	0.0823669	7.53225e-28	4.87911e-26
SPBC3D6.09	R1	Amm	848.415	0.0401649	0.0772623	0.562186	0.774815
SPBC29A3.13	R1	Trp	809.441	0.0703534	0.0800264	0.343426	0.734761
SPBC29A3.13	R1	Gly	809.441	-0.0461484	0.0727589	0.481622	0.999108
SPBC29A3.13	R1	Phe	809.441	-0.0892956	0.07883	0.208278	0.548611
SPBC29A3.13	R1	Ser	809.441	0.119101	0.0816184	0.124604	0.337761
SPBC29A3.13	R1	Ile	809.441	-1.08274	0.0902547	4.40133e-34	1.20376e-31
SPBC29A3.13	R1	Pro	809.441	0.154922	0.0830217	0.0190897	0.167489
SPBC29A3.13	R1	Glu	809.441	-0.919584	0.0872199	1.3037e-26	7.92359e-25
SPBC29A3.13	R1	Amm	809.441	0.120417	0.0825777	0.118628	0.295102
SPBC3D6.04c	R1	Trp	1008.84	0.0382701	0.0883913	0.63781	0.958202
SPBC3D6.04c	R1	Gly	1008.84	-0.0154778	0.0768636	0.812224	0.999108
SPBC3D6.04c	R1	Phe	1008.84	0.0250433	0.0832138	0.730176	0.917361
SPBC3D6.04c	R1	Ser	1008.84	0.0599626	0.0902311	0.480288	0.754244
SPBC3D6.04c	R1	Ile	1008.84	-1.24444	0.0996915	8.07561e-37	3.6142e-34
SPBC3D6.04c	R1	Pro	1008.84	0.0611386	0.079551	0.320706	0.774799
SPBC3D6.04c	R1	Glu	1008.84	-1.00671	0.0974996	8.4515e-26	4.95318e-24
SPBC3D6.04c	R1	Amm	1008.84	0.179253	0.0928463	0.0359843	0.126086
SPCC16A11.04	R1	Trp	1926.99	-0.0124481	0.0866596	0.881238	0.989358
SPCC16A11.04	R1	Gly	1926.99	0.0196297	0.075856	0.752947	0.999108
SPCC16A11.04	R1	Phe	1926.99	-0.120867	0.0867244	0.109687	0.385157
SPCC16A11.04	R1	Ser	1926.99	0.111779	0.0888438	0.1862	0.448247
SPCC16A11.04	R1	Ile	1926.99	-1.17878	0.0951378	2.65546e-36	1.0894e-33
SPCC16A11.04	R1	Pro	1926.99	0.0676317	0.0791113	0.271831	0.730681
SPCC16A11.04	R1	Glu	1926.99	-1.07894	0.0943422	3.62058e-31	2.97069e-29
SPCC16A11.04	R1	Amm	1926.99	0.152961	0.0897305	0.0653243	0.195377
SPAC589.05c	R1	Trp	928.573	-0.0421176	0.103373	0.634921	0.958104
SPAC589.05c	R1	Gly	928.573	0.0811795	0.0943284	0.245775	0.955231
SPAC589.05c	R1	Phe	928.573	-0.106602	0.101368	0.208037	0.548297
SPAC589.05c	R1	Ser	928.573	0.126234	0.106639	0.209539	0.480018
SPAC589.05c	R1	Ile	928.573	-0.993809	0.116631	1.68356e-18	9.86684e-17
SPAC589.05c	R1	Pro	928.573	0.0583263	0.088546	0.363893	0.813016
SPAC589.05c	R1	Glu	928.573	-0.925292	0.11431	1.45559e-16	3.81164e-15
SPAC589.05c	R1	Amm	928.573	0.277938	0.111008	0.00510937	0.0264773
SPBC30B4.06c	R1	Trp	1939.97	-0.0328553	0.0865576	0.696485	0.971842
SPBC30B4.06c	R1	Gly	1939.97	0.0694623	0.0798202	0.281664	0.992891
SPBC30B4.06c	R1	Phe	1939.97	-0.165608	0.0892014	0.0320336	0.17941
SPBC30B4.06c	R1	Ser	1939.97	0.0328302	0.087985	0.687875	0.883272
SPBC30B4.06c	R1	Ile	1939.97	-1.0041	0.0944735	2.62136e-27	3.14755e-25
SPBC30B4.06c	R1	Pro	1939.97	0.0754139	0.0799663	0.209241	0.657635
SPBC30B4.06c	R1	Glu	1939.97	-0.842775	0.0933264	2.77836e-20	1.00572e-18
SPBC30B4.06c	R1	Amm	1939.97	0.348296	0.0924757	4.88174e-05	0.000481619
SPAC607.04	R1	Trp	882.131	-0.0136203	0.120808	0.896487	0.991731
SPAC607.04	R1	Gly	882.131	0.00829712	0.0949871	0.900471	0.999108
SPAC607.04	R1	Phe	882.131	0.0460872	0.109336	0.58838	0.85194
SPAC607.04	R1	Ser	882.131	0.0758729	0.124893	0.503015	0.772134
SPAC607.04	R1	Ile	882.131	-1.20268	0.140895	1.6217e-18	9.61884e-17
SPAC607.04	R1	Pro	882.131	0.0199166	0.0915744	0.74757	0.973959
SPAC607.04	R1	Glu	882.131	-0.801535	0.137386	9.57124e-10	1.10088e-08
SPAC607.04	R1	Amm	882.131	0.279735	0.133001	0.0142608	0.0609428
SPBC887.01	R1	Trp	1761.23	-0.0898639	0.152608	0.475863	0.859932
SPBC887.01	R1	Gly	1761.23	0.032689	0.109803	0.555945	0.999108
SPBC887.01	R1	Phe	1761.23	-0.0478441	0.129081	0.578099	0.847367
SPBC887.01	R1	Ser	1761.23	0.208699	0.167058	0.128831	0.347908
SPBC887.01	R1	Ile	1761.23	-1.16806	0.186199	3.49063e-11	7.81108e-10
SPBC887.01	R1	Pro	1761.23	0.0613488	0.114159	0.314633	0.769171
SPBC887.01	R1	Glu	1761.23	-0.87428	0.184791	2.7381e-07	2.14645e-06
SPBC887.01	R1	Amm	1761.23	0.253964	0.172905	0.0550378	0.173242
SPAC13D6.02c	R1	Trp	6387.49	-0.308605	0.123838	0.00604344	0.0375181
SPAC13D6.02c	R1	Gly	6387.49	0.0562941	0.0961613	0.392103	0.999108
SPAC13D6.02c	R1	Phe	6387.49	0.0413245	0.102787	0.61957	0.868492
SPAC13D6.02c	R1	Ser	6387.49	0.382406	0.124406	0.000770853	0.00624163
SPAC13D6.02c	R1	Ile	6387.49	-1.05101	0.126628	7.83253e-18	4.2842e-16
SPAC13D6.02c	R1	Pro	6387.49	-0.0130489	0.0875521	0.818355	0.979302
SPAC13D6.02c	R1	Glu	6387.49	-0.998427	0.126097	2.49076e-16	6.35339e-15
SPAC13D6.02c	R1	Amm	6387.49	0.400179	0.12609	0.000363251	0.00285213
SPBC19C2.02	R1	Trp	714.708	-0.404439	0.0920253	3.04086e-06	4.73739e-05
SPBC19C2.02	R1	Gly	714.708	0.0705447	0.0786508	0.270014	0.983335
SPBC19C2.02	R1	Phe	714.708	-0.016585	0.0803641	0.814686	0.941757
SPBC19C2.02	R1	Ser	714.708	0.24755	0.0881114	0.00320146	0.0209984
SPBC19C2.02	R1	Ile	714.708	-0.863005	0.094839	1.0961e-20	7.82044e-19
SPBC19C2.02	R1	Pro	714.708	0.0158368	0.0726931	0.791107	0.979228
SPBC19C2.02	R1	Glu	714.708	-1.02339	0.0927991	4.05616e-29	2.85264e-27
SPBC19C2.02	R1	Amm	714.708	0.199014	0.0883535	0.015318	0.0643983
SPBC16G5.18	R1	Trp	2677.06	-0.0393415	0.113679	0.700526	0.971842
SPBC16G5.18	R1	Gly	2677.06	0.0244422	0.0922458	0.735856	0.999108
SPBC16G5.18	R1	Phe	2677.06	0.0462297	0.103951	0.57997	0.848497
SPBC16G5.18	R1	Ser	2677.06	0.210864	0.121196	0.0548429	0.189734
SPBC16G5.18	R1	Ile	2677.06	-0.958902	0.128532	9.37199e-15	3.39252e-13
SPBC16G5.18	R1	Pro	2677.06	0.044544	0.0920153	0.45428	0.869368
SPBC16G5.18	R1	Glu	2677.06	-1.14754	0.127751	2.52434e-20	9.20543e-19
SPBC16G5.18	R1	Amm	2677.06	0.0413305	0.112466	0.668236	0.842025
SPBC32F12.02	R1	Trp	1136.62	-0.14172	0.0717505	0.039669	0.167487
SPBC32F12.02	R1	Gly	1136.62	0.0354451	0.0647497	0.536472	0.999108
SPBC32F12.02	R1	Phe	1136.62	-0.010713	0.067771	0.86742	0.959771
SPBC32F12.02	R1	Ser	1136.62	0.0913558	0.0713673	0.189508	0.45179
SPBC32F12.02	R1	Ile	1136.62	-0.949771	0.0772604	9.22501e-36	3.02765e-33
SPBC32F12.02	R1	Pro	1136.62	0.0106894	0.0629117	0.851151	0.987728
SPBC32F12.02	R1	Glu	1136.62	-1.03434	0.0755833	1.03668e-43	1.59486e-41
SPBC32F12.02	R1	Amm	1136.62	0.170164	0.0723055	0.0134318	0.0581571
SPAC23D3.01	R1	Trp	1144.18	-0.045575	0.0779533	0.556792	0.917521
SPAC23D3.01	R1	Gly	1144.18	0.0103249	0.0694426	0.839281	0.999108
SPAC23D3.01	R1	Phe	1144.18	-0.0179193	0.0741944	0.824635	0.945312
SPAC23D3.01	R1	Ser	1144.18	0.10472	0.0792207	0.16382	0.409623
SPAC23D3.01	R1	Ile	1144.18	-0.969066	0.0855649	1.51444e-30	2.76133e-28
SPAC23D3.01	R1	Pro	1144.18	0.101064	0.0757104	0.0933354	0.425268
SPAC23D3.01	R1	Glu	1144.18	-1.16347	0.084628	8.35769e-44	1.32726e-41
SPAC23D3.01	R1	Amm	1144.18	0.209595	0.0809781	0.00549976	0.0281705
SPCC613.02	R1	Trp	1117.23	-0.0149101	0.112138	0.894377	0.990264
SPCC613.02	R1	Gly	1117.23	-0.00520323	0.0905719	0.928853	0.999108
SPCC613.02	R1	Phe	1117.23	0.00863876	0.101317	0.933866	0.980888
SPCC613.02	R1	Ser	1117.23	0.127758	0.117022	0.23308	0.512128
SPCC613.02	R1	Ile	1117.23	-1.04475	0.128355	4.09064e-17	2.05492e-15
SPCC613.02	R1	Pro	1117.23	0.00897331	0.0872198	0.876192	0.989743
SPCC613.02	R1	Glu	1117.23	-1.11636	0.126649	1.51077e-19	5.12932e-18
SPCC613.02	R1	Amm	1117.23	0.156635	0.116679	0.124588	0.304089
SPAC27F1.04c	R1	Trp	767.795	-0.119627	0.0874863	0.125758	0.396608
SPAC27F1.04c	R1	Gly	767.795	0.00617612	0.0749745	0.983082	0.999108
SPAC27F1.04c	R1	Phe	767.795	0.0746482	0.0829928	0.306878	0.659639
SPAC27F1.04c	R1	Ser	767.795	0.0188515	0.087536	0.852887	0.951453
SPAC27F1.04c	R1	Ile	767.795	-1.04382	0.0969785	5.571e-28	7.61834e-26
SPAC27F1.04c	R1	Pro	767.795	0.0136839	0.073536	0.831063	0.983004
SPAC27F1.04c	R1	Glu	767.795	-1.21652	0.0961635	1.01921e-37	1.2238e-35
SPAC27F1.04c	R1	Amm	767.795	0.26471	0.0917153	0.00170487	0.0107273
SPAC1A6.10	R1	Trp	3056.24	-0.124192	0.154348	0.295612	0.675567
SPAC1A6.10	R1	Gly	3056.24	0.0476866	0.112626	0.456099	0.999108
SPAC1A6.10	R1	Phe	3056.24	-0.0119622	0.12463	0.891665	0.967207
SPAC1A6.10	R1	Ser	3056.24	0.128946	0.15837	0.336196	0.628357
SPAC1A6.10	R1	Ile	3056.24	-1.098	0.182661	1.7686e-10	3.4011e-09
SPAC1A6.10	R1	Pro	3056.24	0.12865	0.151883	0.0916577	0.421851
SPAC1A6.10	R1	Glu	3056.24	-1.10573	0.181842	1.21041e-10	1.60615e-09
SPAC1A6.10	R1	Amm	3056.24	0.370112	0.180879	0.00997722	0.0459905
SPBC16D10.01c	R1	Trp	1353.51	-0.261859	0.128329	0.0188494	0.0936385
SPBC16D10.01c	R1	Gly	1353.51	0.0710097	0.102032	0.300341	0.999108
SPBC16D10.01c	R1	Phe	1353.51	0.0298743	0.105191	0.708911	0.911663
SPBC16D10.01c	R1	Ser	1353.51	0.139942	0.122345	0.206898	0.476728
SPBC16D10.01c	R1	Ile	1353.51	-1.01142	0.13386	3.95987e-15	1.48812e-13
SPBC16D10.01c	R1	Pro	1353.51	-0.015529	0.0895157	0.809949	0.979302
SPBC16D10.01c	R1	Glu	1353.51	-1.04864	0.132121	2.57247e-16	6.52796e-15
SPBC16D10.01c	R1	Amm	1353.51	0.374981	0.130905	0.00109636	0.007414
SPBC16G5.17	R1	Trp	1327.81	-0.0181872	0.127186	0.855416	0.989358
SPBC16G5.17	R1	Gly	1327.81	-0.00540823	0.0978871	0.950412	0.999108
SPBC16G5.17	R1	Phe	1327.81	0.0815843	0.118908	0.339179	0.6891
SPBC16G5.17	R1	Ser	1327.81	0.111425	0.133821	0.342098	0.632584
SPBC16G5.17	R1	Ile	1327.81	-0.764191	0.149946	4.71736e-08	5.83507e-07
SPBC16G5.17	R1	Pro	1327.81	0.0445598	0.0989705	0.463998	0.873192
SPBC16G5.17	R1	Glu	1327.81	-0.732681	0.148161	1.61109e-07	1.30451e-06
SPBC16G5.17	R1	Amm	1327.81	-0.00293671	0.125507	0.996816	0.999252
SPCC1753.05	R1	Trp	792.163	-0.0519453	0.0840496	0.49037	0.869004
SPCC1753.05	R1	Gly	792.163	-0.00993113	0.0735409	0.839994	0.999108
SPCC1753.05	R1	Phe	792.163	0.0548291	0.0798778	0.465781	0.78687
SPCC1753.05	R1	Ser	792.163	0.1993	0.085841	0.016265	0.075327
SPCC1753.05	R1	Ile	792.163	-0.807837	0.0921358	1.37499e-19	9.27271e-18
SPCC1753.05	R1	Pro	792.163	0.0480232	0.0737622	0.460895	0.87252
SPCC1753.05	R1	Glu	792.163	-0.847284	0.0894756	3.25929e-22	1.38323e-20
SPCC1753.05	R1	Amm	792.163	-0.0242222	0.0833707	0.733383	0.879744
SPAC644.10	R1	Trp	453.358	-0.0418009	0.108809	0.663902	0.965027
SPAC644.10	R1	Gly	453.358	0.00250345	0.0884878	0.965178	0.999108
SPAC644.10	R1	Phe	453.358	0.044503	0.0999937	0.552019	0.83331
SPAC644.10	R1	Ser	453.358	0.2563	0.115682	0.0166436	0.0767914
SPAC644.10	R1	Ile	453.358	-0.763202	0.12541	1.81235e-10	3.45822e-09
SPAC644.10	R1	Pro	453.358	0.0865846	0.0985902	0.182846	0.618066
SPAC644.10	R1	Glu	453.358	-0.668782	0.121254	8.44571e-09	8.23331e-08
SPAC644.10	R1	Amm	453.358	0.0344368	0.10837	0.723264	0.873773
SPBC887.05c	R1	Trp	1787.07	-0.180569	0.0884763	0.0291569	0.132263
SPBC887.05c	R1	Gly	1787.07	0.0126613	0.0749791	0.858637	0.999108
SPBC887.05c	R1	Phe	1787.07	0.0742112	0.0827298	0.299879	0.65439
SPBC887.05c	R1	Ser	1787.07	0.212334	0.0889401	0.0123952	0.0617626
SPBC887.05c	R1	Ile	1787.07	-0.714729	0.0930796	2.78871e-15	1.08101e-13
SPBC887.05c	R1	Pro	1787.07	0.0633798	0.0776915	0.278551	0.737962
SPBC887.05c	R1	Glu	1787.07	-0.776346	0.0925406	9.54293e-18	2.89999e-16
SPBC887.05c	R1	Amm	1787.07	0.00921184	0.0863573	0.908328	0.95951
SPAC144.09c	R1	Trp	1245.44	-0.181764	0.0970244	0.0420432	0.175128
SPAC144.09c	R1	Gly	1245.44	-0.000295334	0.0796796	0.998728	0.999419
SPAC144.09c	R1	Phe	1245.44	0.474712	0.101648	3.16223e-07	1.40249e-05
SPAC144.09c	R1	Ser	1245.44	0.129924	0.0960601	0.145036	0.377785
SPAC144.09c	R1	Ile	1245.44	-0.786857	0.103041	3.95666e-15	1.48812e-13
SPAC144.09c	R1	Pro	1245.44	0.123342	0.0935067	0.0696518	0.364652
SPAC144.09c	R1	Glu	1245.44	-0.658118	0.101064	1.81568e-11	2.6603e-10
SPAC144.09c	R1	Amm	1245.44	0.0463992	0.0934874	0.591353	0.793683
SPAC31G5.08	R1	Trp	1437.27	-0.23844	0.105441	0.0118541	0.0642851
SPAC31G5.08	R1	Gly	1437.27	-0.0151203	0.0835873	0.7956	0.999108
SPAC31G5.08	R1	Phe	1437.27	0.244011	0.107226	0.00602932	0.0548657
SPAC31G5.08	R1	Ser	1437.27	0.213869	0.104156	0.0276405	0.113679
SPAC31G5.08	R1	Ile	1437.27	-0.983272	0.110368	6.87894e-20	4.76972e-18
SPAC31G5.08	R1	Pro	1437.27	0.0171019	0.0810355	0.795473	0.979302
SPAC31G5.08	R1	Glu	1437.27	-0.825961	0.108565	6.81119e-15	1.46019e-13
SPAC31G5.08	R1	Amm	1437.27	0.080509	0.0996589	0.351961	0.605206
SPAC3G6.08	R1	Trp	797.078	-0.0216191	0.142021	0.860121	0.989358
SPAC3G6.08	R1	Gly	797.078	-0.0656351	0.116019	0.3392	0.999108
SPAC3G6.08	R1	Phe	797.078	0.0716428	0.128794	0.480452	0.795048
SPAC3G6.08	R1	Ser	797.078	0.616375	0.17289	5.1474e-05	0.00055329
SPAC3G6.08	R1	Ile	797.078	-0.709941	0.175593	8.38173e-06	6.3875e-05
SPAC3G6.08	R1	Pro	797.078	0.0567904	0.109465	0.361954	0.812363
SPAC3G6.08	R1	Glu	797.078	-0.76632	0.173358	1.96988e-06	1.31405e-05
SPAC3G6.08	R1	Amm	797.078	0.144019	0.149944	0.240652	0.478323
SPCC18.16c	R1	Trp	1460.79	-0.115343	0.121388	0.310214	0.69323
SPCC18.16c	R1	Gly	1460.79	0.00614172	0.0935373	0.926855	0.999108
SPCC18.16c	R1	Phe	1460.79	0.0576954	0.108584	0.498399	0.8055
SPCC18.16c	R1	Ser	1460.79	0.553691	0.133864	7.3416e-06	9.41217e-05
SPCC18.16c	R1	Ile	1460.79	-0.725453	0.135983	1.53529e-08	2.0483e-07
SPCC18.16c	R1	Pro	1460.79	0.0182277	0.0906553	0.702576	0.966839
SPCC18.16c	R1	Glu	1460.79	-0.80638	0.135324	4.46796e-10	5.51272e-09
SPCC18.16c	R1	Amm	1460.79	0.246665	0.129945	0.0269171	0.0992605
SPAC664.09	R1	Trp	1519.75	0.0402582	0.114979	0.701031	0.971842
SPAC664.09	R1	Gly	1519.75	-0.448401	0.136049	6.95888e-05	0.00221023
SPAC664.09	R1	Phe	1519.75	0.0353436	0.104244	0.668184	0.89109
SPAC664.09	R1	Ser	1519.75	0.256948	0.124353	0.0228882	0.0985816
SPAC664.09	R1	Ile	1519.75	-0.855891	0.131208	8.49478e-12	2.08059e-10
SPAC664.09	R1	Pro	1519.75	0.0180699	0.0890354	0.790173	0.979228
SPAC664.09	R1	Glu	1519.75	-0.770492	0.129792	5.44667e-10	6.62073e-09
SPAC664.09	R1	Amm	1519.75	0.291658	0.12691	0.00839094	0.0397789
SPAC23D3.02	R1	Trp	1346	0.139655	0.085262	0.0808619	0.290148
SPAC23D3.02	R1	Gly	1346	-0.0625039	0.0772335	0.316832	0.999108
SPAC23D3.02	R1	Phe	1346	-0.022385	0.0793367	0.725715	0.916047
SPAC23D3.02	R1	Ser	1346	0.344837	0.0877391	3.51709e-05	0.000389093
SPAC23D3.02	R1	Ile	1346	-0.86653	0.0915725	4.79451e-22	3.807e-20
SPAC23D3.02	R1	Pro	1346	0.0243782	0.0722957	0.707596	0.969172
SPAC23D3.02	R1	Glu	1346	-0.921128	0.0899367	3.16577e-25	1.75113e-23
SPAC23D3.02	R1	Amm	1346	0.271597	0.087768	0.000820844	0.00578114
SPAC17C9.02c	R1	Trp	530.384	0.180835	0.0952262	0.0397671	0.167614
SPAC17C9.02c	R1	Gly	530.384	-0.0953401	0.0888889	0.160257	0.805869
SPAC17C9.02c	R1	Phe	530.384	-0.0161034	0.0867193	0.827385	0.94647
SPAC17C9.02c	R1	Ser	530.384	0.203976	0.0961423	0.0242109	0.102485
SPAC17C9.02c	R1	Ile	530.384	-0.786386	0.104989	1.06625e-14	3.80972e-13
SPAC17C9.02c	R1	Pro	530.384	0.0259748	0.0779386	0.688545	0.964168
SPAC17C9.02c	R1	Glu	530.384	-0.809211	0.101728	3.25217e-16	8.16859e-15
SPAC17C9.02c	R1	Amm	530.384	0.231755	0.0978044	0.0093611	0.0437236
SPAC3H1.01c	R1	Trp	1624.19	0.058963	0.0746618	0.445823	0.835791
SPAC3H1.01c	R1	Gly	1624.19	-0.0490813	0.0688023	0.393547	0.999108
SPAC3H1.01c	R1	Phe	1624.19	-0.00347218	0.071216	0.943869	0.982862
SPAC3H1.01c	R1	Ser	1624.19	0.155426	0.0761016	0.0355512	0.137377
SPAC3H1.01c	R1	Ile	1624.19	-0.81729	0.0803785	4.95978e-25	4.69558e-23
SPAC3H1.01c	R1	Pro	1624.19	0.108046	0.0733096	0.0720664	0.371253
SPAC3H1.01c	R1	Glu	1624.19	-0.780232	0.0790608	1.19954e-23	5.73334e-22
SPAC3H1.01c	R1	Amm	1624.19	0.116442	0.0758447	0.0998703	0.262629
SPBC1861.04c	R1	Trp	1608.7	0.107315	0.131298	0.341843	0.732473
SPBC1861.04c	R1	Gly	1608.7	-0.132706	0.130966	0.11049	0.678668
SPBC1861.04c	R1	Phe	1608.7	-0.00559936	0.112236	0.949175	0.982862
SPBC1861.04c	R1	Ser	1608.7	0.110345	0.134433	0.357588	0.64962
SPBC1861.04c	R1	Ile	1608.7	-0.793231	0.150541	1.8472e-08	2.44457e-07
SPBC1861.04c	R1	Pro	1608.7	0.0414302	0.0985635	0.501763	0.898759
SPBC1861.04c	R1	Glu	1608.7	-0.916993	0.149688	1.21678e-10	1.61027e-09
SPBC1861.04c	R1	Amm	1608.7	0.12091	0.131744	0.273381	0.516841
SPAC12B10.15c	R1	Trp	166.905	-0.340848	0.200084	0.0255235	0.118989
SPAC12B10.15c	R1	Gly	166.905	0.0263427	0.111918	0.669715	0.999108
SPAC12B10.15c	R1	Phe	166.905	0.0334961	0.132756	0.702725	0.908573
SPAC12B10.15c	R1	Ser	166.905	0.160856	0.17506	0.27145	0.556349
SPAC12B10.15c	R1	Ile	166.905	-0.973309	0.215736	6.32315e-07	6.36582e-06
SPAC12B10.15c	R1	Pro	166.905	0.125185	0.160401	0.0843075	0.404736
SPAC12B10.15c	R1	Glu	166.905	-1.50204	0.215636	3.4808e-13	6.23126e-12
SPAC12B10.15c	R1	Amm	166.905	0.190285	0.178708	0.150933	0.350328
SPAC3A12.09c	R1	Trp	355.573	-0.201889	0.132408	0.0794013	0.287239
SPAC3A12.09c	R1	Gly	355.573	0.147386	0.128714	0.0751262	0.56736
SPAC3A12.09c	R1	Phe	355.573	-0.045854	0.111102	0.578853	0.847367
SPAC3A12.09c	R1	Ser	355.573	0.11442	0.128283	0.315543	0.607278
SPAC3A12.09c	R1	Ile	355.573	-0.953226	0.147874	1.49625e-11	3.54135e-10
SPAC3A12.09c	R1	Pro	355.573	0.123404	0.122986	0.0972007	0.436048
SPAC3A12.09c	R1	Glu	355.573	-1.37642	0.147357	1.07206e-21	4.31926e-20
SPAC3A12.09c	R1	Amm	355.573	0.251935	0.136338	0.030584	0.110385
SPBP23A10.09	R1	Trp	444.142	-0.114752	0.104989	0.229361	0.585355
SPBP23A10.09	R1	Gly	444.142	0.0663208	0.0912065	0.331492	0.999108
SPBP23A10.09	R1	Phe	444.142	-0.0141398	0.0945228	0.858094	0.957479
SPBP23A10.09	R1	Ser	444.142	0.276871	0.109213	0.00633094	0.0359898
SPBP23A10.09	R1	Ile	444.142	-0.969838	0.119818	6.61503e-17	3.22434e-15
SPBP23A10.09	R1	Pro	444.142	0.128044	0.104172	0.0766162	0.384978
SPBP23A10.09	R1	Glu	444.142	-1.37316	0.119957	2.94487e-31	2.45722e-29
SPBP23A10.09	R1	Amm	444.142	0.0776606	0.105265	0.411594	0.661534
SPAC16E8.04c	R1	Trp	1855.53	-0.206914	0.0781847	0.00454744	0.0293408
SPAC16E8.04c	R1	Gly	1855.53	0.0520462	0.0698025	0.387141	0.999108
SPAC16E8.04c	R1	Phe	1855.53	0.0340039	0.0725778	0.632231	0.873855
SPAC16E8.04c	R1	Ser	1855.53	0.0639468	0.0768411	0.406352	0.697271
SPAC16E8.04c	R1	Ile	1855.53	-1.1175	0.0821866	3.4441e-43	2.82588e-40
SPAC16E8.04c	R1	Pro	1855.53	0.0994235	0.0736201	0.0992109	0.442231
SPAC16E8.04c	R1	Glu	1855.53	-1.37718	0.0817051	3.38395e-65	1.85102e-62
SPAC16E8.04c	R1	Amm	1855.53	0.0681545	0.0763738	0.351566	0.604738
SPAC1952.06c	R1	Trp	1456.34	-0.205717	0.0864402	0.00880725	0.0502994
SPAC1952.06c	R1	Gly	1456.34	-0.0132992	0.0732458	0.839261	0.999108
SPAC1952.06c	R1	Phe	1456.34	0.0633853	0.0797305	0.335424	0.685467
SPAC1952.06c	R1	Ser	1456.34	0.121171	0.0847466	0.146849	0.380695
SPAC1952.06c	R1	Ile	1456.34	-1.02365	0.0905359	1.57077e-30	2.76174e-28
SPAC1952.06c	R1	Pro	1456.34	0.0270148	0.071804	0.6343	0.9433
SPAC1952.06c	R1	Glu	1456.34	-1.22952	0.0891959	3.20754e-44	5.44508e-42
SPAC1952.06c	R1	Amm	1456.34	0.0690567	0.0829203	0.396315	0.648623
SPAC25B8.16	R1	Trp	1282.18	0.029868	0.102479	0.732794	0.975895
SPAC25B8.16	R1	Gly	1282.18	-0.0581295	0.0901511	0.427266	0.999108
SPAC25B8.16	R1	Phe	1282.18	0.100381	0.0998081	0.23287	0.580173
SPAC25B8.16	R1	Ser	1282.18	-0.100557	0.105902	0.296022	0.587628
SPAC25B8.16	R1	Ile	1282.18	-1.054	0.115072	4.81774e-21	3.53996e-19
SPAC25B8.16	R1	Pro	1282.18	0.198339	0.114318	0.015196	0.143264
SPAC25B8.16	R1	Glu	1282.18	-1.74633	0.115336	4.44932e-53	1.369e-50
SPAC25B8.16	R1	Amm	1282.18	0.227168	0.108884	0.0206778	0.0805356
SPAC2C4.13	R1	Trp	1596.83	-0.0486067	0.103926	0.585224	0.934821
SPAC2C4.13	R1	Gly	1596.83	0.0311643	0.0872631	0.63676	0.999108
SPAC2C4.13	R1	Phe	1596.83	0.0606642	0.0971637	0.457827	0.782327
SPAC2C4.13	R1	Ser	1596.83	0.00492803	0.105745	0.986657	0.99425
SPAC2C4.13	R1	Ile	1596.83	-0.768467	0.115368	4.01015e-12	1.04455e-10
SPAC2C4.13	R1	Pro	1596.83	0.158997	0.11084	0.0383362	0.253421
SPAC2C4.13	R1	Glu	1596.83	-1.49885	0.115215	6.07961e-40	7.67434e-38
SPAC2C4.13	R1	Amm	1596.83	0.0326794	0.102892	0.765852	0.895622
SPAPB1E7.10	R1	Trp	520.728	0.0150353	0.0931765	0.867415	0.989358
SPAPB1E7.10	R1	Gly	520.728	0.0133793	0.0798593	0.858625	0.999108
SPAPB1E7.10	R1	Phe	520.728	0.0129697	0.0867503	0.874314	0.961582
SPAPB1E7.10	R1	Ser	520.728	0.158635	0.095666	0.079128	0.245461
SPAPB1E7.10	R1	Ile	520.728	-0.911066	0.105491	6.57413e-19	4.09676e-17
SPAPB1E7.10	R1	Pro	520.728	-0.0673738	0.0832601	0.289645	0.746932
SPAPB1E7.10	R1	Glu	520.728	-1.52607	0.104878	3.81446e-49	9.88346e-47
SPAPB1E7.10	R1	Amm	520.728	0.239688	0.0968564	0.00691364	0.0339679
SPBC19F8.02	R1	Trp	1116.23	-0.397092	0.188524	0.00798237	0.0470625
SPBC19F8.02	R1	Gly	1116.23	0.0110507	0.107603	0.853526	0.999108
SPBC19F8.02	R1	Phe	1116.23	0.101619	0.142608	0.27904	0.636567
SPBC19F8.02	R1	Ser	1116.23	-0.0200234	0.15747	0.927606	0.97765
SPBC19F8.02	R1	Ile	1116.23	-1.12487	0.190982	3.60966e-10	6.63074e-09
SPBC19F8.02	R1	Pro	1116.23	0.0395439	0.107317	0.50916	0.90557
SPBC19F8.02	R1	Glu	1116.23	-0.928497	0.18957	1.26637e-07	1.04254e-06
SPBC19F8.02	R1	Amm	1116.23	0.420585	0.190576	0.00539687	0.0277336
SPBC725.15	R1	Trp	3794.12	-0.432013	0.0839451	6.64199e-08	1.4663e-06
SPBC725.15	R1	Gly	3794.12	0.0172588	0.0705442	0.772867	0.999108
SPBC725.15	R1	Phe	3794.12	0.0830113	0.0771214	0.243159	0.588889
SPBC725.15	R1	Ser	3794.12	-0.0110743	0.0801848	0.839264	0.94482
SPBC725.15	R1	Ile	3794.12	-1.08756	0.0846165	7.01048e-39	3.83473e-36
SPBC725.15	R1	Pro	3794.12	0.0460441	0.0707948	0.44834	0.867377
SPBC725.15	R1	Glu	3794.12	-1.16091	0.0839103	2.11397e-44	3.71682e-42
SPBC725.15	R1	Amm	3794.12	0.452553	0.0834537	1.28706e-08	3.20011e-07
SPAC9.02c	R1	Trp	1996.83	-0.219906	0.100752	0.0170347	0.086012
SPAC9.02c	R1	Gly	1996.83	-0.0132512	0.0813977	0.86154	0.999108
SPAC9.02c	R1	Phe	1996.83	0.274661	0.103823	0.0020593	0.02437
SPAC9.02c	R1	Ser	1996.83	0.0340799	0.0974467	0.715671	0.895183
SPAC9.02c	R1	Ile	1996.83	-1.19386	0.105608	9.26036e-31	1.75341e-28
SPAC9.02c	R1	Pro	1996.83	0.0952072	0.0904766	0.157343	0.58021
SPAC9.02c	R1	Glu	1996.83	-1.11857	0.10414	6.80289e-28	4.46542e-26
SPAC9.02c	R1	Amm	1996.83	0.173408	0.0987954	0.0545754	0.172338
SPAC8C9.17c	R1	Trp	723.65	-0.336366	0.11855	0.0016907	0.0128844
SPAC8C9.17c	R1	Gly	723.65	0.0474938	0.0914853	0.489595	0.999108
SPAC8C9.17c	R1	Phe	723.65	-0.0251919	0.0983297	0.762013	0.927673
SPAC8C9.17c	R1	Ser	723.65	0.109487	0.111463	0.284433	0.572917
SPAC8C9.17c	R1	Ile	723.65	-1.17242	0.12432	5.57199e-22	4.35411e-20
SPAC8C9.17c	R1	Pro	723.65	0.0663506	0.0935027	0.317059	0.770534
SPAC8C9.17c	R1	Glu	723.65	-1.14534	0.123183	1.87685e-21	7.27539e-20
SPAC8C9.17c	R1	Amm	723.65	0.18138	0.11455	0.0689606	0.203533
SPBP16F5.05c	R1	Trp	979.437	-0.334909	0.122114	0.00204314	0.0151274
SPBP16F5.05c	R1	Gly	979.437	0.0445166	0.0926358	0.509979	0.999108
SPBP16F5.05c	R1	Phe	979.437	0.088234	0.105132	0.28683	0.646106
SPBP16F5.05c	R1	Ser	979.437	-0.0371885	0.112927	0.711231	0.89344
SPBP16F5.05c	R1	Ile	979.437	-1.35478	0.126564	7.65275e-28	9.91434e-26
SPBP16F5.05c	R1	Pro	979.437	0.0926169	0.101541	0.173017	0.60354
SPBP16F5.05c	R1	Glu	979.437	-1.28552	0.124077	3.84402e-26	2.30782e-24
SPBP16F5.05c	R1	Amm	979.437	0.279508	0.119562	0.00746449	0.0362046
SPBC543.06c	R1	Trp	1783.44	-0.393861	0.0765119	7.74187e-08	1.69392e-06
SPBC543.06c	R1	Gly	1783.44	0.038169	0.0664892	0.506395	0.999108
SPBC543.06c	R1	Phe	1783.44	0.146134	0.0730798	0.0248996	0.151897
SPBC543.06c	R1	Ser	1783.44	-0.00353898	0.0733477	0.981751	0.993047
SPBC543.06c	R1	Ile	1783.44	-0.968148	0.0781505	3.60378e-36	1.36472e-33
SPBC543.06c	R1	Pro	1783.44	0.0477561	0.0660017	0.392145	0.837627
SPBC543.06c	R1	Glu	1783.44	-1.48003	0.0780812	2.80159e-81	3.44805e-78
SPBC543.06c	R1	Amm	1783.44	0.500445	0.0756658	5.96299e-12	3.09008e-10
SPAC31A2.07c	R1	Trp	3169.16	-0.263739	0.0935073	0.00259725	0.0186661
SPAC31A2.07c	R1	Gly	3169.16	0.133948	0.0896422	0.0626765	0.511703
SPAC31A2.07c	R1	Phe	3169.16	0.0294725	0.0834326	0.628127	0.872285
SPAC31A2.07c	R1	Ser	3169.16	0.130737	0.0910023	0.135525	0.359863
SPAC31A2.07c	R1	Ile	3169.16	-0.699045	0.095664	3.72957e-14	1.24059e-12
SPAC31A2.07c	R1	Pro	3169.16	0.00511395	0.0746314	0.931897	0.992374
SPAC31A2.07c	R1	Glu	3169.16	-1.36451	0.095731	3.65924e-47	7.85865e-45
SPAC31A2.07c	R1	Amm	3169.16	0.470211	0.0950509	1.97833e-07	3.80443e-06
SPAC1952.05	R1	Trp	1117.61	-0.14963	0.118127	0.15497	0.452117
SPAC1952.05	R1	Gly	1117.61	0.118145	0.111822	0.161962	0.807906
SPAC1952.05	R1	Phe	1117.61	0.0167555	0.102389	0.854701	0.955451
SPAC1952.05	R1	Ser	1117.61	-0.0063449	0.116441	0.949432	0.985985
SPAC1952.05	R1	Ile	1117.61	-0.895898	0.12988	6.58588e-13	1.95315e-11
SPAC1952.05	R1	Pro	1117.61	0.108068	0.109569	0.176088	0.607541
SPAC1952.05	R1	Glu	1117.61	-1.29794	0.129495	1.37064e-24	7.02881e-23
SPAC1952.05	R1	Amm	1117.61	0.39699	0.127722	0.00044938	0.00344059
SPCC330.13	R1	Trp	1178.67	-0.226906	0.147432	0.0638795	0.244161
SPCC330.13	R1	Gly	1178.67	0.025143	0.10192	0.699382	0.999108
SPCC330.13	R1	Phe	1178.67	0.0372757	0.11742	0.669125	0.891744
SPCC330.13	R1	Ser	1178.67	0.05005	0.138235	0.680219	0.879946
SPCC330.13	R1	Ile	1178.67	-0.88484	0.159421	3.38382e-09	5.17346e-08
SPCC330.13	R1	Pro	1178.67	0.0438704	0.101429	0.474332	0.879939
SPCC330.13	R1	Glu	1178.67	-1.185	0.158461	7.56143e-15	1.61147e-13
SPCC330.13	R1	Amm	1178.67	0.438503	0.158385	0.00113463	0.00762046
SPAC1834.10c	R1	Trp	979.623	-0.0364219	0.100731	0.697905	0.971842
SPAC1834.10c	R1	Gly	979.623	-0.00927127	0.0841604	0.921659	0.999108
SPAC1834.10c	R1	Phe	979.623	0.0191435	0.0926624	0.802895	0.938492
SPAC1834.10c	R1	Ser	979.623	-0.00635523	0.102545	0.937529	0.982603
SPAC1834.10c	R1	Ile	979.623	-1.14673	0.113463	4.35256e-25	4.37299e-23
SPAC1834.10c	R1	Pro	979.623	0.169414	0.108161	0.0260966	0.204006
SPAC1834.10c	R1	Glu	979.623	-1.46343	0.111978	5.30154e-40	6.86828e-38
SPAC1834.10c	R1	Amm	979.623	0.26477	0.107145	0.00599726	0.0301887
SPBC8D2.05c	R1	Trp	1123.41	-0.0505339	0.12108	0.63029	0.955038
SPBC8D2.05c	R1	Gly	1123.41	0.106125	0.114693	0.159043	0.802814
SPBC8D2.05c	R1	Phe	1123.41	-0.0565703	0.110504	0.508111	0.810185
SPBC8D2.05c	R1	Ser	1123.41	0.041787	0.124585	0.785012	0.926243
SPBC8D2.05c	R1	Ile	1123.41	-1.12564	0.140854	1.85057e-16	8.59466e-15
SPBC8D2.05c	R1	Pro	1123.41	0.202064	0.142787	0.0234886	0.192495
SPBC8D2.05c	R1	Glu	1123.41	-1.30674	0.140363	1.58678e-21	6.24938e-20
SPBC8D2.05c	R1	Amm	1123.41	0.51286	0.139881	3.93056e-05	0.000401455
SPAC323.01c	R1	Trp	897.13	0.0839132	0.124721	0.441277	0.83339
SPAC323.01c	R1	Gly	897.13	-0.072163	0.106653	0.30864	0.999108
SPAC323.01c	R1	Phe	897.13	0.0818506	0.115555	0.360132	0.71082
SPAC323.01c	R1	Ser	897.13	-0.0355985	0.127207	0.729357	0.903349
SPAC323.01c	R1	Ile	897.13	-1.09335	0.145077	4.69602e-15	1.72526e-13
SPAC323.01c	R1	Pro	897.13	0.147914	0.132567	0.0593599	0.329175
SPAC323.01c	R1	Glu	897.13	-1.08832	0.143288	3.98027e-15	8.94742e-14
SPAC323.01c	R1	Amm	897.13	0.65997	0.14286	3.99721e-07	7.05314e-06
SPAC823.13c	R1	Trp	1086.16	-0.235103	0.087962	0.00426427	0.0279162
SPAC823.13c	R1	Gly	1086.16	0.0234263	0.0741685	0.696015	0.999108
SPAC823.13c	R1	Phe	1086.16	0.00286014	0.0793707	0.971354	0.991066
SPAC823.13c	R1	Ser	1086.16	0.0576127	0.0855328	0.487385	0.760264
SPAC823.13c	R1	Ile	1086.16	-0.917258	0.092938	6.50343e-24	5.82116e-22
SPAC823.13c	R1	Pro	1086.16	0.263991	0.0916941	0.000595996	0.0130767
SPAC823.13c	R1	Glu	1086.16	-1.28514	0.0928203	1.15437e-44	2.18576e-42
SPAC823.13c	R1	Amm	1086.16	0.741922	0.0894828	1.42852e-17	1.86818e-15
SPAC8E11.10	R1	Trp	5450.24	-0.423004	0.200306	0.00691088	0.0418993
SPAC8E11.10	R1	Gly	5450.24	0.0574709	0.11994	0.463792	0.999108
SPAC8E11.10	R1	Phe	5450.24	0.145187	0.162299	0.149265	0.461579
SPAC8E11.10	R1	Ser	5450.24	0.939396	0.200643	2.08242e-07	3.55963e-06
SPAC8E11.10	R1	Ile	5450.24	-1.64561	0.198391	7.04704e-18	3.94234e-16
SPAC8E11.10	R1	Pro	5450.24	-0.0189796	0.104653	0.790879	0.979228
SPAC8E11.10	R1	Glu	5450.24	-1.85663	0.197499	3.62022e-22	1.52328e-20
SPAC8E11.10	R1	Amm	5450.24	0.419387	0.201226	0.00586653	0.0295911
SPBC106.17c	R1	Trp	4818.02	-0.259174	0.120072	0.0163778	0.0834306
SPBC106.17c	R1	Gly	4818.02	0.0929445	0.103125	0.198348	0.874187
SPBC106.17c	R1	Phe	4818.02	0.157295	0.114678	0.0806885	0.327207
SPBC106.17c	R1	Ser	4818.02	0.597865	0.123971	2.7111e-07	4.49385e-06
SPBC106.17c	R1	Ile	4818.02	-1.4688	0.124699	4.24277e-33	1.04436e-30
SPBC106.17c	R1	Pro	4818.02	-0.110082	0.107758	0.135953	0.536357
SPBC106.17c	R1	Glu	4818.02	-1.15829	0.124236	1.07916e-21	4.31926e-20
SPBC106.17c	R1	Amm	4818.02	0.715581	0.124787	1.01941e-09	3.414e-08
SPCC4B3.10c	R1	Trp	5662.43	-0.050898	0.137792	0.628835	0.954259
SPCC4B3.10c	R1	Gly	5662.43	-0.12202	0.13592	0.123727	0.715527
SPCC4B3.10c	R1	Phe	5662.43	0.336892	0.169991	0.00684757	0.0605217
SPCC4B3.10c	R1	Ser	5662.43	0.962264	0.164276	5.06876e-10	1.41781e-08
SPCC4B3.10c	R1	Ile	5662.43	-0.771322	0.164858	4.1294e-07	4.31614e-06
SPCC4B3.10c	R1	Pro	5662.43	0.0703614	0.112178	0.203133	0.651509
SPCC4B3.10c	R1	Glu	5662.43	-1.45534	0.163709	5.12892e-20	1.82969e-18
SPCC4B3.10c	R1	Amm	5662.43	0.0827847	0.137998	0.479479	0.716598
SPCC794.03	R1	Trp	8574.97	-0.838732	0.17255	1.55134e-07	3.11724e-06
SPCC794.03	R1	Gly	8574.97	0.0261873	0.105548	0.689564	0.999108
SPCC794.03	R1	Phe	8574.97	0.187321	0.156937	0.083433	0.33217
SPCC794.03	R1	Ser	8574.97	0.838618	0.171906	1.68429e-07	2.92995e-06
SPCC794.03	R1	Ile	8574.97	-0.546534	0.170739	0.000253493	0.0012839
SPCC794.03	R1	Pro	8574.97	-0.0156398	0.0994577	0.675961	0.958764
SPCC794.03	R1	Glu	8574.97	-1.71664	0.170317	3.71298e-25	2.031e-23
SPCC794.03	R1	Amm	8574.97	0.792354	0.17314	5.46867e-07	9.31566e-06
SPCC1884.02	R1	Trp	755.614	-0.433961	0.297456	0.0178897	0.0896853
SPCC1884.02	R1	Gly	755.614	0.0709852	0.141174	0.19438	0.867897
SPCC1884.02	R1	Phe	755.614	-0.123006	0.187848	0.175419	0.5068
SPCC1884.02	R1	Ser	755.614	0.44117	0.285188	0.0255581	0.107174
SPCC1884.02	R1	Ile	755.614	-0.143017	0.224666	0.385516	0.525899
SPCC1884.02	R1	Pro	755.614	0.0260062	0.114916	0.564258	0.926419
SPCC1884.02	R1	Glu	755.614	-1.03136	0.294115	4.4659e-05	0.000227359
SPCC1884.02	R1	Amm	755.614	0.0927182	0.194995	0.465733	0.706935
SPBC725.11c	R1	Trp	812.648	-0.109548	0.183877	0.409282	0.804991
SPBC725.11c	R1	Gly	812.648	0.0301381	0.118352	0.602621	0.999108
SPBC725.11c	R1	Phe	812.648	0.0783113	0.153318	0.381946	0.728404
SPBC725.11c	R1	Ser	812.648	0.436301	0.237728	0.016101	0.0747081
SPBC725.11c	R1	Ile	812.648	-0.154217	0.201067	0.336336	0.476483
SPBC725.11c	R1	Pro	812.648	0.00972669	0.108578	0.846366	0.98719
SPBC725.11c	R1	Glu	812.648	-1.22663	0.244284	4.33868e-08	3.81416e-07
SPBC725.11c	R1	Amm	812.648	0.0264457	0.170103	0.827394	0.92553
SPCC13B11.01	R1	Trp	295593	-0.163298	0.135256	0.155453	0.45257
SPCC13B11.01	R1	Gly	295593	0.0444124	0.102556	0.51146	0.999108
SPCC13B11.01	R1	Phe	295593	-0.0153665	0.112283	0.854918	0.955451
SPCC13B11.01	R1	Ser	295593	0.344727	0.145025	0.007252	0.0402498
SPCC13B11.01	R1	Ile	295593	-0.199867	0.139004	0.108896	0.205479
SPCC13B11.01	R1	Pro	295593	0.0981395	0.117742	0.161258	0.586858
SPCC13B11.01	R1	Glu	295593	-1.45537	0.148079	7.03096e-24	3.42707e-22
SPCC13B11.01	R1	Amm	295593	0.0580554	0.126973	0.593022	0.794407
SPAC19G12.16c	R1	Trp	6251.26	-0.0652365	0.217416	0.618556	0.950718
SPAC19G12.16c	R1	Gly	6251.26	0.0276777	0.127672	0.51393	0.999108
SPAC19G12.16c	R1	Phe	6251.26	-0.00538137	0.156831	0.946074	0.982862
SPAC19G12.16c	R1	Ser	6251.26	-0.149905	0.258606	0.340485	0.632584
SPAC19G12.16c	R1	Ile	6251.26	-0.0267209	0.243077	0.861372	0.915092
SPAC19G12.16c	R1	Pro	6251.26	0.0305479	0.120651	0.4168	0.848901
SPAC19G12.16c	R1	Glu	6251.26	-1.48289	0.390243	9.9498e-06	5.80365e-05
SPAC19G12.16c	R1	Amm	6251.26	0.0291221	0.203918	0.796706	0.908505
SPAC869.05c	R1	Trp	4608.32	-0.0919598	0.196324	0.461677	0.847656
SPAC869.05c	R1	Gly	4608.32	0.119559	0.182272	0.0870409	0.605852
SPAC869.05c	R1	Phe	4608.32	-0.119136	0.182862	0.184671	0.520757
SPAC869.05c	R1	Ser	4608.32	-0.0993456	0.209061	0.502113	0.771684
SPAC869.05c	R1	Ile	4608.32	0.225682	0.235804	0.190678	0.313634
SPAC869.05c	R1	Pro	4608.32	0.052404	0.124439	0.280884	0.741294
SPAC869.05c	R1	Glu	4608.32	-1.54841	0.280933	2.5423e-09	2.7327e-08
SPAC869.05c	R1	Amm	4608.32	-0.0150691	0.181374	0.896671	0.957489
SPCC18.01c	R1	Trp	6196.72	-0.0424222	0.176643	0.778808	0.982297
SPCC18.01c	R1	Gly	6196.72	0.0251698	0.117817	0.619196	0.999108
SPCC18.01c	R1	Phe	6196.72	0.028885	0.142304	0.697008	0.905375
SPCC18.01c	R1	Ser	6196.72	-0.0196488	0.186849	0.889509	0.966435
SPCC18.01c	R1	Ile	6196.72	-0.0532522	0.193411	0.748988	0.834412
SPCC18.01c	R1	Pro	6196.72	0.0391275	0.115172	0.383976	0.831833
SPCC18.01c	R1	Glu	6196.72	-1.20651	0.24595	9.09098e-08	7.61138e-07
SPCC18.01c	R1	Amm	6196.72	-0.13133	0.187556	0.306632	0.557193
SPBC651.04	R1	Trp	302.753	0.112151	0.208537	0.375931	0.772094
SPBC651.04	R1	Gly	302.753	-0.0259652	0.123142	0.587834	0.999108
SPBC651.04	R1	Phe	302.753	-0.0176268	0.150234	0.811603	0.941757
SPBC651.04	R1	Ser	302.753	0.0237505	0.209925	0.916056	0.973472
SPBC651.04	R1	Ile	302.753	-0.227732	0.250403	0.193246	0.316916
SPBC651.04	R1	Pro	302.753	0.0206333	0.114535	0.633658	0.9433
SPBC651.04	R1	Glu	302.753	-1.30011	0.308631	2.04192e-06	1.35843e-05
SPBC651.04	R1	Amm	302.753	0.127661	0.20953	0.319653	0.571821
SPBC1703.02	R1	Trp	2703	-0.0583133	0.128099	0.597036	0.940546
SPBC1703.02	R1	Gly	2703	0.0348539	0.100474	0.55388	0.999108
SPBC1703.02	R1	Phe	2703	-0.0387144	0.113432	0.651664	0.883299
SPBC1703.02	R1	Ser	2703	0.0289818	0.13136	0.807148	0.931472
SPBC1703.02	R1	Ile	2703	-0.163259	0.137137	0.152781	0.265749
SPBC1703.02	R1	Pro	2703	0.0277358	0.0956761	0.693343	0.96496
SPBC1703.02	R1	Glu	2703	-1.28625	0.147879	3.26368e-19	1.04332e-17
SPBC1703.02	R1	Amm	2703	0.0737446	0.127304	0.496885	0.729794
SPCC24B10.08c	R1	Trp	1161.26	-0.00077309	0.106431	0.989989	0.997804
SPCC24B10.08c	R1	Gly	1161.26	-0.0429645	0.0905379	0.520052	0.999108
SPCC24B10.08c	R1	Phe	1161.26	0.000654411	0.0971075	0.997401	0.999167
SPCC24B10.08c	R1	Ser	1161.26	0.0812971	0.109768	0.427803	0.715008
SPCC24B10.08c	R1	Ile	1161.26	-0.0952663	0.111027	0.357353	0.49837
SPCC24B10.08c	R1	Pro	1161.26	0.0494874	0.0890944	0.465411	0.873256
SPCC24B10.08c	R1	Glu	1161.26	-1.29396	0.119836	3.20495e-28	2.16136e-26
SPCC24B10.08c	R1	Amm	1161.26	0.00211768	0.105904	0.984122	0.992184
SPBPB7E8.01	R1	Trp	7062.15	-0.0658701	0.174583	0.606214	0.946976
SPBPB7E8.01	R1	Gly	7062.15	0.871951	0.245716	1.8426e-05	0.000703189
SPBPB7E8.01	R1	Phe	7062.15	-0.046004	0.142912	0.585532	0.850819
SPBPB7E8.01	R1	Ser	7062.15	-0.191747	0.200002	0.210837	0.480311
SPBPB7E8.01	R1	Ile	7062.15	0.173199	0.198994	0.270991	0.406487
SPBPB7E8.01	R1	Pro	7062.15	0.772965	0.250042	8.50226e-05	0.00261404
SPBPB7E8.01	R1	Glu	7062.15	-1.83437	0.233069	3.33612e-16	8.33692e-15
SPBPB7E8.01	R1	Amm	7062.15	-0.0267044	0.167174	0.82254	0.924225
SPAC17A2.01	R1	Trp	19194	-0.197672	0.177707	0.143302	0.430956
SPAC17A2.01	R1	Gly	19194	-0.0311797	0.112839	0.610647	0.999108
SPAC17A2.01	R1	Phe	19194	0.465733	0.217416	0.0027374	0.0301495
SPAC17A2.01	R1	Ser	19194	0.116259	0.170526	0.409015	0.699403
SPAC17A2.01	R1	Ile	19194	-0.561963	0.202142	0.00111157	0.00464931
SPAC17A2.01	R1	Pro	19194	0.214201	0.226847	0.0302357	0.223918
SPAC17A2.01	R1	Glu	19194	-2.2878	0.200157	1.8163e-31	1.59672e-29
SPAC17A2.01	R1	Amm	19194	0.116676	0.1633	0.346812	0.600758
SPAPJ760.03c	R1	Trp	1191.59	-0.0848053	0.150718	0.479576	0.862614
SPAPJ760.03c	R1	Gly	1191.59	-0.13216	0.151617	0.0957276	0.630036
SPAPJ760.03c	R1	Phe	1191.59	0.457852	0.190023	0.00146854	0.0186331
SPAPJ760.03c	R1	Ser	1191.59	-0.060849	0.153887	0.605367	0.838316
SPAPJ760.03c	R1	Ile	1191.59	-0.101972	0.15791	0.424796	0.565514
SPAPJ760.03c	R1	Pro	1191.59	0.102474	0.13407	0.146959	0.557242
SPAPJ760.03c	R1	Glu	1191.59	-1.82978	0.179669	1.72151e-25	9.74136e-24
SPAPJ760.03c	R1	Amm	1191.59	0.202799	0.162145	0.118034	0.294218
SPBC25D12.03c	R1	Trp	3615.05	-0.00684997	0.120354	0.961293	0.997804
SPBC25D12.03c	R1	Gly	3615.05	0.0096204	0.0949067	0.824724	0.999108
SPBC25D12.03c	R1	Phe	3615.05	0.0455424	0.109265	0.607065	0.862545
SPBC25D12.03c	R1	Ser	3615.05	-0.134203	0.127058	0.23898	0.519648
SPBC25D12.03c	R1	Ile	3615.05	-0.429912	0.136466	0.000565644	0.00257125
SPBC25D12.03c	R1	Pro	3615.05	0.198307	0.141993	0.0261188	0.204006
SPBC25D12.03c	R1	Glu	3615.05	-1.04382	0.137906	4.11174e-15	9.20095e-14
SPBC25D12.03c	R1	Amm	3615.05	0.0974884	0.122099	0.377062	0.631602
SPBC887.14c	R1	Trp	2411.74	-0.0399579	0.132786	0.76023	0.981109
SPBC887.14c	R1	Gly	2411.74	0.0169501	0.100841	0.778399	0.999108
SPBC887.14c	R1	Phe	2411.74	0.0502996	0.118356	0.55678	0.834154
SPBC887.14c	R1	Ser	2411.74	-0.235191	0.147058	0.0706692	0.227537
SPBC887.14c	R1	Ile	2411.74	-0.447849	0.155021	0.00113488	0.00473476
SPBC887.14c	R1	Pro	2411.74	0.2265	0.168621	0.0211555	0.179785
SPBC887.14c	R1	Glu	2411.74	-1.00267	0.156502	2.04682e-11	2.99006e-10
SPBC887.14c	R1	Amm	2411.74	0.15646	0.139866	0.165328	0.372459
SPAC18B11.10	R1	Trp	2804.65	0.0133705	0.137613	0.872221	0.989358
SPAC18B11.10	R1	Gly	2804.65	-0.0207609	0.103577	0.746575	0.999108
SPAC18B11.10	R1	Phe	2804.65	0.0800547	0.127182	0.377166	0.726241
SPAC18B11.10	R1	Ser	2804.65	-0.113999	0.146342	0.417838	0.707497
SPAC18B11.10	R1	Ile	2804.65	-0.253162	0.155565	0.0684612	0.142776
SPAC18B11.10	R1	Pro	2804.65	0.0436531	0.103524	0.472606	0.87905
SPAC18B11.10	R1	Glu	2804.65	-0.884201	0.165544	1.54991e-08	1.46173e-07
SPAC18B11.10	R1	Amm	2804.65	0.19147	0.150409	0.114479	0.288314
SPBC13A2.02	R1	Trp	2726.97	0.00957583	0.130752	0.990378	0.997804
SPBC13A2.02	R1	Gly	2726.97	0.00277663	0.0994724	0.967575	0.999108
SPBC13A2.02	R1	Phe	2726.97	-0.0391576	0.116118	0.647761	0.880932
SPBC13A2.02	R1	Ser	2726.97	-0.0172921	0.13546	0.884273	0.963541
SPBC13A2.02	R1	Ile	2726.97	-0.26274	0.14633	0.0433996	0.0997462
SPBC13A2.02	R1	Pro	2726.97	0.0384582	0.0993272	0.535671	0.918769
SPBC13A2.02	R1	Glu	2726.97	-0.890303	0.153659	1.81617e-09	1.98393e-08
SPBC13A2.02	R1	Amm	2726.97	0.0966654	0.132791	0.374612	0.629855
SPAC824.06	R1	Trp	1496.31	-0.00362673	0.0833408	0.953554	0.997141
SPAC824.06	R1	Gly	1496.31	-0.0257314	0.0739207	0.682282	0.999108
SPAC824.06	R1	Phe	1496.31	0.0831329	0.0810088	0.24526	0.590422
SPAC824.06	R1	Ser	1496.31	-0.00520386	0.0846056	0.940374	0.98353
SPAC824.06	R1	Ile	1496.31	-0.436607	0.0889864	3.45047e-07	3.68475e-06
SPAC824.06	R1	Pro	1496.31	0.017534	0.0716523	0.761511	0.975234
SPAC824.06	R1	Glu	1496.31	-0.988673	0.0893127	3.17473e-29	2.2651e-27
SPAC824.06	R1	Amm	1496.31	0.129678	0.0846837	0.102309	0.266509
SPBC4.04c	R1	Trp	2226.61	-0.0456623	0.13514	0.678239	0.969854
SPBC4.04c	R1	Gly	2226.61	0.0369682	0.104514	0.586859	0.999108
SPBC4.04c	R1	Phe	2226.61	0.105927	0.129883	0.254329	0.604568
SPBC4.04c	R1	Ser	2226.61	-0.110163	0.142386	0.363765	0.654628
SPBC4.04c	R1	Ile	2226.61	-0.40661	0.157433	0.0031306	0.0112496
SPBC4.04c	R1	Pro	2226.61	0.108676	0.128	0.172648	0.60354
SPBC4.04c	R1	Glu	2226.61	-0.98083	0.160141	9.3363e-11	1.25239e-09
SPBC4.04c	R1	Amm	2226.61	0.232152	0.150268	0.0577536	0.179046
SPBC776.14	R1	Trp	2249.74	-0.164884	0.0644311	0.00785049	0.04662
SPBC776.14	R1	Gly	2249.74	0.0379018	0.0591348	0.454594	0.999108
SPBC776.14	R1	Phe	2249.74	-0.0140446	0.0612734	0.841544	0.95174
SPBC776.14	R1	Ser	2249.74	0.0993888	0.0639695	0.109223	0.308671
SPBC776.14	R1	Ile	2249.74	-0.293825	0.065501	4.39226e-06	3.56817e-05
SPBC776.14	R1	Pro	2249.74	0.0776203	0.0605653	0.131455	0.528005
SPBC776.14	R1	Glu	2249.74	-1.05529	0.0666035	3.3724e-57	1.2771e-54
SPBC776.14	R1	Amm	2249.74	0.0471764	0.0636148	0.42113	0.66943
SPCC162.03	R1	Trp	4846.88	-0.0849532	0.0796643	0.260393	0.630863
SPCC162.03	R1	Gly	4846.88	-0.0561635	0.0728159	0.355462	0.999108
SPCC162.03	R1	Phe	4846.88	0.183564	0.0814615	0.0120818	0.0925019
SPCC162.03	R1	Ser	4846.88	0.190312	0.0813359	0.0145321	0.0695148
SPCC162.03	R1	Ile	4846.88	-0.287572	0.082521	0.000284491	0.00141756
SPCC162.03	R1	Pro	4846.88	0.147968	0.0814329	0.0243108	0.196573
SPCC162.03	R1	Glu	4846.88	-1.01026	0.0838306	1.11006e-33	1.16273e-31
SPCC162.03	R1	Amm	4846.88	0.0731074	0.0792773	0.328573	0.582277
SPAC18G6.07c	R1	Trp	3901.47	-0.13924	0.0805951	0.0610818	0.236033
SPAC18G6.07c	R1	Gly	3901.47	0.0366925	0.0713949	0.551201	0.999108
SPAC18G6.07c	R1	Phe	3901.47	-0.0105579	0.0749483	0.914395	0.975329
SPAC18G6.07c	R1	Ser	3901.47	0.132229	0.0807857	0.106481	0.303187
SPAC18G6.07c	R1	Ile	3901.47	-0.380034	0.0832092	1.17115e-06	1.10876e-05
SPAC18G6.07c	R1	Pro	3901.47	0.0270578	0.0693156	0.63388	0.9433
SPAC18G6.07c	R1	Glu	3901.47	-0.844162	0.0834506	1.14563e-24	5.99991e-23
SPAC18G6.07c	R1	Amm	3901.47	0.185421	0.081219	0.0159444	0.0661956
SPBC1604.08c	R1	Trp	5892.33	-0.262985	0.103585	0.00373128	0.024958
SPBC1604.08c	R1	Gly	5892.33	-0.0144143	0.0822532	0.880981	0.999108
SPBC1604.08c	R1	Phe	5892.33	0.0831829	0.0932187	0.232605	0.579804
SPBC1604.08c	R1	Ser	5892.33	0.144135	0.100618	0.134739	0.35894
SPBC1604.08c	R1	Ile	5892.33	-0.343313	0.104334	0.000299515	0.0014849
SPBC1604.08c	R1	Pro	5892.33	0.00820535	0.0794372	0.819027	0.979302
SPBC1604.08c	R1	Glu	5892.33	-0.811734	0.10556	2.43958e-15	5.61217e-14
SPBC1604.08c	R1	Amm	5892.33	0.127974	0.0989456	0.159225	0.363236
SPAC1A6.05c	R1	Trp	2078.17	-0.161473	0.112176	0.116698	0.377715
SPAC1A6.05c	R1	Gly	2078.17	0.0665991	0.0949706	0.348364	0.999108
SPAC1A6.05c	R1	Phe	2078.17	0.0569724	0.100229	0.500407	0.806384
SPAC1A6.05c	R1	Ser	2078.17	0.0337043	0.110202	0.730756	0.903671
SPAC1A6.05c	R1	Ile	2078.17	-0.228774	0.115044	0.0345255	0.0826296
SPAC1A6.05c	R1	Pro	2078.17	0.0298371	0.0866548	0.593281	0.934385
SPAC1A6.05c	R1	Glu	2078.17	-0.822265	0.119631	1.06494e-12	1.78324e-11
SPAC1A6.05c	R1	Amm	2078.17	0.314699	0.117757	0.00262989	0.0153219
SPAC12B10.09	R1	Trp	1054.8	-0.0232355	0.098215	0.800491	0.985697
SPAC12B10.09	R1	Gly	1054.8	-0.0012287	0.082615	0.978452	0.999108
SPAC12B10.09	R1	Phe	1054.8	0.152552	0.0997687	0.0662384	0.290634
SPAC12B10.09	R1	Ser	1054.8	0.058358	0.0997189	0.537447	0.796019
SPAC12B10.09	R1	Ile	1054.8	-0.377589	0.105595	0.000152704	0.00082611
SPAC12B10.09	R1	Pro	1054.8	0.0935324	0.0913922	0.165949	0.595044
SPAC12B10.09	R1	Glu	1054.8	-0.846734	0.10586	2.3523e-16	6.03144e-15
SPAC12B10.09	R1	Amm	1054.8	0.219445	0.101767	0.0175353	0.0712134
SPAC17H9.04c	R1	Trp	4595.27	-0.0514007	0.162125	0.6433	0.959102
SPAC17H9.04c	R1	Gly	4595.27	0.0203394	0.112137	0.775384	0.999108
SPAC17H9.04c	R1	Phe	4595.27	0.103891	0.152292	0.270687	0.62563
SPAC17H9.04c	R1	Ser	4595.27	0.128309	0.176219	0.390264	0.682997
SPAC17H9.04c	R1	Ile	4595.27	-0.357766	0.200019	0.0284824	0.0704618
SPAC17H9.04c	R1	Pro	4595.27	-0.0179192	0.105961	0.815356	0.979302
SPAC17H9.04c	R1	Glu	4595.27	-0.784587	0.208826	3.11797e-05	0.000164874
SPAC17H9.04c	R1	Amm	4595.27	0.25948	0.19402	0.0632754	0.191225
SPAC5H10.09c	R1	Trp	366.052	-0.330776	0.115995	0.00158554	0.0122154
SPAC5H10.09c	R1	Gly	366.052	0.0658656	0.0923423	0.331729	0.999108
SPAC5H10.09c	R1	Phe	366.052	0.0187312	0.0957946	0.816187	0.942402
SPAC5H10.09c	R1	Ser	366.052	0.0085274	0.106781	0.92899	0.97869
SPAC5H10.09c	R1	Ile	366.052	-0.442192	0.1171	5.56001e-05	0.000345169
SPAC5H10.09c	R1	Pro	366.052	0.239719	0.117991	0.00594826	0.0734328
SPAC5H10.09c	R1	Glu	366.052	-0.943419	0.117553	1.51721e-16	3.95197e-15
SPAC5H10.09c	R1	Amm	366.052	0.171363	0.108816	0.077488	0.219616
SPBP8B7.17c	R1	Trp	2529.98	-0.335989	0.0879342	4.81124e-05	0.000566644
SPBP8B7.17c	R1	Gly	2529.98	0.093628	0.0795808	0.138819	0.751257
SPBP8B7.17c	R1	Phe	2529.98	0.00735688	0.078268	0.881989	0.963825
SPBP8B7.17c	R1	Ser	2529.98	-0.000624695	0.0841462	0.99	0.994476
SPBP8B7.17c	R1	Ile	2529.98	-0.523075	0.0886526	8.03408e-10	1.37333e-08
SPBP8B7.17c	R1	Pro	2529.98	0.0964203	0.0797164	0.118096	0.494212
SPBP8B7.17c	R1	Glu	2529.98	-0.816287	0.0884178	3.13938e-21	1.20743e-19
SPBP8B7.17c	R1	Amm	2529.98	0.0773473	0.0832696	0.305821	0.556378
SPAC1F5.10	R1	Trp	3989.56	-0.442696	0.0613648	1.60651e-13	7.90883e-12
SPAC1F5.10	R1	Gly	3989.56	0.0013643	0.0551238	0.978959	0.999108
SPAC1F5.10	R1	Phe	3989.56	0.0334837	0.0574678	0.537042	0.827659
SPAC1F5.10	R1	Ser	3989.56	0.195991	0.0598532	0.000811494	0.00647485
SPAC1F5.10	R1	Ile	3989.56	-0.545577	0.061314	1.41725e-19	9.42855e-18
SPAC1F5.10	R1	Pro	3989.56	0.00226793	0.0541924	0.963423	0.995173
SPAC1F5.10	R1	Glu	3989.56	-1.0241	0.0612352	8.45439e-64	4.1621e-61
SPAC1F5.10	R1	Amm	3989.56	0.114237	0.059312	0.0465986	0.153654
SPAC25B8.15c	R1	Trp	940.788	-0.324063	0.099951	0.000445689	0.0041243
SPAC25B8.15c	R1	Gly	940.788	0.118036	0.0913749	0.0943823	0.629503
SPAC25B8.15c	R1	Phe	940.788	-0.109128	0.0916503	0.16405	0.489467
SPAC25B8.15c	R1	Ser	940.788	0.208241	0.0960596	0.0215538	0.0942359
SPAC25B8.15c	R1	Ile	940.788	-0.442412	0.100125	3.40295e-06	2.8491e-05
SPAC25B8.15c	R1	Pro	940.788	0.119079	0.0913995	0.0817837	0.39916
SPAC25B8.15c	R1	Glu	940.788	-1.06287	0.100611	4.52519e-27	2.81993e-25
SPAC25B8.15c	R1	Amm	940.788	0.112549	0.0932346	0.190104	0.409396
SPBC13G1.07	R1	Trp	1133.29	-0.312256	0.101698	0.000878388	0.00735426
SPBC13G1.07	R1	Gly	1133.29	0.0531182	0.0837296	0.417474	0.999108
SPBC13G1.07	R1	Phe	1133.29	0.383706	0.103096	2.9919e-05	0.000729165
SPBC13G1.07	R1	Ser	1133.29	-0.080648	0.0968298	0.377292	0.669137
SPBC13G1.07	R1	Ile	1133.29	-0.472751	0.102779	1.27852e-06	1.20347e-05
SPBC13G1.07	R1	Pro	1133.29	0.177105	0.101381	0.0194069	0.168788
SPBC13G1.07	R1	Glu	1133.29	-0.907789	0.102838	1.53792e-19	5.18574e-18
SPBC13G1.07	R1	Amm	1133.29	0.097976	0.0951998	0.260299	0.503933
SPCC126.03	R1	Trp	1693.84	-0.274195	0.131118	0.0159294	0.0816029
SPCC126.03	R1	Gly	1693.84	0.0327412	0.0958179	0.609033	0.999108
SPCC126.03	R1	Phe	1693.84	0.215318	0.130604	0.0306014	0.174854
SPCC126.03	R1	Ser	1693.84	-0.0172339	0.121801	0.84115	0.945861
SPCC126.03	R1	Ile	1693.84	-0.342518	0.132092	0.00347381	0.0123033
SPCC126.03	R1	Pro	1693.84	0.0639903	0.0992909	0.326039	0.777682
SPCC126.03	R1	Glu	1693.84	-0.866889	0.134518	2.78084e-11	3.97967e-10
SPCC126.03	R1	Amm	1693.84	0.203456	0.126456	0.0596099	0.182507
SPBC83.15	R1	Trp	2572.76	-0.356093	0.0981992	7.89027e-05	0.000878819
SPBC83.15	R1	Gly	2572.76	0.0408159	0.0803014	0.522419	0.999108
SPBC83.15	R1	Phe	2572.76	0.275442	0.0982595	0.00125551	0.0164385
SPBC83.15	R1	Ser	2572.76	-0.0459327	0.0930029	0.578509	0.821342
SPBC83.15	R1	Ile	2572.76	-0.350096	0.0973124	0.000129287	0.000723671
SPBC83.15	R1	Pro	2572.76	0.118777	0.0906365	0.0798478	0.393703
SPBC83.15	R1	Glu	2572.76	-0.736371	0.0981076	1.07946e-14	2.26134e-13
SPBC83.15	R1	Amm	2572.76	0.446025	0.0980322	1.3303e-06	2.02757e-05
SPBC1773.16c	R1	Trp	715.354	-0.319267	0.254926	0.051904	0.206067
SPBC1773.16c	R1	Gly	715.354	0.059362	0.132169	0.321685	0.999108
SPBC1773.16c	R1	Phe	715.354	0.131499	0.186628	0.162784	0.488099
SPBC1773.16c	R1	Ser	715.354	-0.223468	0.227659	0.17006	0.420706
SPBC1773.16c	R1	Ile	715.354	-0.384515	0.256462	0.0409146	0.0952353
SPBC1773.16c	R1	Pro	715.354	0.252459	0.394757	0.0170191	0.154711
SPBC1773.16c	R1	Glu	715.354	-0.722284	0.271869	0.00132666	0.00482358
SPBC1773.16c	R1	Amm	715.354	0.31555	0.258241	0.0493702	0.160323
SPBC685.09	R1	Trp	2097.02	-0.430726	0.0941856	8.27292e-07	1.44424e-05
SPBC685.09	R1	Gly	2097.02	0.0847235	0.0823439	0.182743	0.854363
SPBC685.09	R1	Phe	2097.02	0.0550187	0.0832332	0.425802	0.759502
SPBC685.09	R1	Ser	2097.02	-0.0872097	0.0894235	0.306374	0.597347
SPBC685.09	R1	Ile	2097.02	-0.373667	0.0932263	2.43023e-05	0.000167798
SPBC685.09	R1	Pro	2097.02	0.118323	0.0869223	0.0722462	0.371615
SPBC685.09	R1	Glu	2097.02	-0.869234	0.0941061	5.46927e-21	2.05536e-19
SPBC685.09	R1	Amm	2097.02	0.346121	0.0931392	6.30718e-05	0.000607122
SPAC19D5.06c	R1	Trp	1072.78	-0.00232634	0.102878	0.959064	0.997804
SPAC19D5.06c	R1	Gly	1072.78	0.00444448	0.0854835	0.953181	0.999108
SPAC19D5.06c	R1	Phe	1072.78	0.133451	0.10367	0.112754	0.391457
SPAC19D5.06c	R1	Ser	1072.78	-0.301079	0.111802	0.00391997	0.0246148
SPAC19D5.06c	R1	Ile	1072.78	-0.310526	0.111839	0.00297345	0.0107873
SPAC19D5.06c	R1	Pro	1072.78	0.242799	0.117872	0.00527725	0.0682104
SPAC19D5.06c	R1	Glu	1072.78	-1.1426	0.11544	7.0186e-24	3.42707e-22
SPAC19D5.06c	R1	Amm	1072.78	0.499318	0.113985	1.94495e-06	2.81617e-05
SPAC19D5.10c	R1	Trp	27.7613	-0.0333284	0.205443	0.785193	0.982297
SPAC19D5.10c	R1	Gly	27.7613	0.0097385	0.122898	0.83798	0.999108
SPAC19D5.10c	R1	Phe	27.7613	0.115904	0.195023	0.160898	0.485356
SPAC19D5.10c	R1	Ser	27.7613	-0.098287	0.236805	0.511569	0.776674
SPAC19D5.10c	R1	Ile	27.7613	-0.280456	0.303769	0.137203	0.24464
SPAC19D5.10c	R1	Pro	27.7613	0.0582037	0.132434	0.174199	NA
SPAC19D5.10c	R1	Glu	27.7613	-1.54537	0.420984	2.05647e-05	0.000112865
SPAC19D5.10c	R1	Amm	27.7613	0.282564	0.313702	0.0698851	0.205645
SPBC23E6.10c	R1	Trp	1706.51	-0.203687	0.0829929	0.00836445	0.0484745
SPBC23E6.10c	R1	Gly	1706.51	0.0645336	0.0740887	0.29282	0.999108
SPBC23E6.10c	R1	Phe	1706.51	0.0194121	0.0756573	0.760641	0.927282
SPBC23E6.10c	R1	Ser	1706.51	0.0821584	0.080764	0.292246	0.583941
SPBC23E6.10c	R1	Ile	1706.51	-0.35815	0.0837455	1.0547e-05	7.80799e-05
SPBC23E6.10c	R1	Pro	1706.51	0.0550982	0.0716337	0.338194	0.790156
SPBC23E6.10c	R1	Glu	1706.51	-1.2337	0.0845596	7.92099e-49	1.94975e-46
SPBC23E6.10c	R1	Amm	1706.51	0.549134	0.083112	6.27482e-12	3.21781e-10
SPAC27F1.05c	R1	Trp	1039.6	-0.0735707	0.190748	0.569104	0.924754
SPAC27F1.05c	R1	Gly	1039.6	0.0237214	0.120377	0.658147	0.999108
SPAC27F1.05c	R1	Phe	1039.6	0.192702	0.231982	0.0742733	0.309608
SPAC27F1.05c	R1	Ser	1039.6	-0.313384	0.251285	0.0745402	0.236292
SPAC27F1.05c	R1	Ile	1039.6	-0.758779	0.283079	0.000839559	0.00364339
SPAC27F1.05c	R1	Pro	1039.6	0.100761	0.161676	0.0816028	0.398681
SPAC27F1.05c	R1	Glu	1039.6	-0.859104	0.279805	0.000278046	0.00118924
SPAC27F1.05c	R1	Amm	1039.6	0.45865	0.28981	0.0144649	0.0616543
SPBC12D12.05c	R1	Trp	1725.31	-0.0317376	0.117166	0.753846	0.981109
SPBC12D12.05c	R1	Gly	1725.31	0.0150521	0.0934342	0.755867	0.999108
SPBC12D12.05c	R1	Phe	1725.31	0.166053	0.122796	0.0825707	0.330187
SPBC12D12.05c	R1	Ser	1725.31	-0.413405	0.132041	0.000527435	0.00450792
SPBC12D12.05c	R1	Ile	1725.31	-0.736835	0.133959	6.10037e-09	8.88524e-08
SPBC12D12.05c	R1	Pro	1725.31	0.0652352	0.0989222	0.286839	0.746932
SPBC12D12.05c	R1	Glu	1725.31	-1.04569	0.133127	5.3625e-16	1.31998e-14
SPBC12D12.05c	R1	Amm	1725.31	0.220629	0.126268	0.0449695	0.14878
SPBC2G2.14	R1	Trp	1963.93	-0.13337	0.097153	0.134787	0.414463
SPBC2G2.14	R1	Gly	1963.93	0.0135227	0.0808765	0.789327	0.999108
SPBC2G2.14	R1	Phe	1963.93	0.0983411	0.0926638	0.217324	0.561112
SPBC2G2.14	R1	Ser	1963.93	0.00122139	0.0967539	0.994452	0.996679
SPBC2G2.14	R1	Ile	1963.93	-0.481151	0.103293	9.329e-07	8.95257e-06
SPBC2G2.14	R1	Pro	1963.93	0.0979684	0.0907699	0.142162	0.54722
SPBC2G2.14	R1	Glu	1963.93	-1.02172	0.104295	1.35623e-23	6.41992e-22
SPBC2G2.14	R1	Amm	1963.93	0.405348	0.103557	2.33055e-05	0.000256101
SPAC20G8.08c	R1	Trp	1147.59	-0.0278676	0.177526	0.825931	0.989176
SPAC20G8.08c	R1	Gly	1147.59	0.0154069	0.116782	0.802487	0.999108
SPAC20G8.08c	R1	Phe	1147.59	-0.0248853	0.142759	0.758004	0.926428
SPAC20G8.08c	R1	Ser	1147.59	0.108164	0.196423	0.469547	0.746338
SPAC20G8.08c	R1	Ile	1147.59	-0.53332	0.251846	0.00661758	0.0212514
SPAC20G8.08c	R1	Pro	1147.59	0.0598707	0.125225	0.229698	0.679756
SPAC20G8.08c	R1	Glu	1147.59	-0.876162	0.253049	7.66981e-05	0.000371639
SPAC20G8.08c	R1	Amm	1147.59	0.408506	0.256365	0.0170919	0.0697587
SPAPB24D3.01	R1	Trp	1905.49	-0.0403047	0.160792	0.748574	0.980375
SPAPB24D3.01	R1	Gly	1905.49	0.0501604	0.119188	0.401834	0.999108
SPAPB24D3.01	R1	Phe	1905.49	0.0170782	0.132668	0.865647	0.959194
SPAPB24D3.01	R1	Ser	1905.49	-0.0619205	0.17036	0.658968	0.868662
SPAPB24D3.01	R1	Ile	1905.49	-0.57458	0.209562	0.00116011	0.00483184
SPAPB24D3.01	R1	Pro	1905.49	0.0849792	0.132839	0.180664	0.61614
SPAPB24D3.01	R1	Glu	1905.49	-0.807194	0.2093	1.78802e-05	9.90147e-05
SPAPB24D3.01	R1	Amm	1905.49	0.37197	0.208348	0.0162435	0.0670861
SPBC21D10.07	R1	Trp	320.57	-0.0804728	0.102644	0.38013	0.77522
SPBC21D10.07	R1	Gly	320.57	0.0462764	0.0874223	0.489511	0.999108
SPBC21D10.07	R1	Phe	320.57	0.0420526	0.0946282	0.600411	0.860232
SPBC21D10.07	R1	Ser	320.57	0.00338652	0.104272	0.985785	0.99386
SPBC21D10.07	R1	Ile	320.57	-0.418115	0.114725	0.000108769	0.0006224
SPBC21D10.07	R1	Pro	320.57	0.0521821	0.0870485	0.412421	0.844972
SPBC21D10.07	R1	Glu	320.57	-0.869556	0.117228	1.61673e-14	3.28892e-13
SPBC21D10.07	R1	Amm	320.57	0.319536	0.113044	0.00168123	0.0106112
SPAC23C11.13c	R1	Trp	4738.61	-0.0587917	0.0962403	0.480268	0.862799
SPAC23C11.13c	R1	Gly	4738.61	0.0378398	0.0830193	0.559477	0.999108
SPAC23C11.13c	R1	Phe	4738.61	0.2895	0.104379	0.00133595	0.0172621
SPAC23C11.13c	R1	Ser	4738.61	-0.0904607	0.0982613	0.32563	0.619188
SPAC23C11.13c	R1	Ile	4738.61	-0.490362	0.10379	5.00184e-07	5.18401e-06
SPAC23C11.13c	R1	Pro	4738.61	0.191398	0.104928	0.0161047	0.148107
SPAC23C11.13c	R1	Glu	4738.61	-0.975418	0.104052	1.01388e-21	4.12506e-20
SPAC23C11.13c	R1	Amm	4738.61	0.367153	0.103491	0.000125997	0.00110174
SPAC27E2.10c	R1	Trp	1018.47	-0.0428052	0.094587	0.64237	0.959102
SPAC27E2.10c	R1	Gly	1018.47	0.0118165	0.0804614	0.845518	0.999108
SPAC27E2.10c	R1	Phe	1018.47	0.28809	0.102295	0.00105573	0.0145177
SPAC27E2.10c	R1	Ser	1018.47	-0.0290261	0.096347	0.76873	0.921168
SPAC27E2.10c	R1	Ile	1018.47	-0.625931	0.104189	4.22947e-10	7.62699e-09
SPAC27E2.10c	R1	Pro	1018.47	0.154772	0.099288	0.0331081	0.23499
SPAC27E2.10c	R1	Glu	1018.47	-0.984368	0.104003	4.37272e-22	1.79391e-20
SPAC27E2.10c	R1	Amm	1018.47	0.339772	0.101833	0.000261387	0.0020992
SPCC757.08	R1	Trp	847.574	-0.0485818	0.125912	0.670302	0.969001
SPCC757.08	R1	Gly	847.574	0.0200322	0.0977946	0.780816	0.999108
SPCC757.08	R1	Phe	847.574	0.235182	0.142007	0.0254804	0.153715
SPCC757.08	R1	Ser	847.574	-0.0625954	0.129975	0.605641	0.838316
SPCC757.08	R1	Ile	847.574	-0.60737	0.1463	6.45731e-06	5.03793e-05
SPCC757.08	R1	Pro	847.574	0.115644	0.122374	0.11422	0.482578
SPCC757.08	R1	Glu	847.574	-1.09204	0.145726	6.79941e-15	1.46019e-13
SPCC757.08	R1	Amm	847.574	0.397476	0.144091	0.00128267	0.00843069
SPAC5D6.01	R1	Trp	7293.67	-0.0163761	0.131333	0.836618	0.989176
SPAC5D6.01	R1	Gly	7293.67	-0.112749	0.12678	0.155384	0.797662
SPAC5D6.01	R1	Phe	7293.67	0.277367	0.156233	0.0149444	0.107091
SPAC5D6.01	R1	Ser	7293.67	0.058948	0.13681	0.6621	0.870009
SPAC5D6.01	R1	Ile	7293.67	-0.483266	0.153484	0.000477074	0.00221988
SPAC5D6.01	R1	Pro	7293.67	0.0345183	0.0986455	0.56566	0.926619
SPAC5D6.01	R1	Glu	7293.67	-0.832348	0.154329	1.18897e-08	1.13878e-07
SPAC5D6.01	R1	Amm	7293.67	0.161842	0.139224	0.176672	0.387938
SPAC9G1.12	R1	Trp	2184.21	-0.0276902	0.122656	0.757057	0.981109
SPAC9G1.12	R1	Gly	2184.21	-0.00115121	0.0955978	0.996012	0.999108
SPAC9G1.12	R1	Phe	2184.21	0.288758	0.142423	0.00874988	0.0728609
SPAC9G1.12	R1	Ser	2184.21	-0.0313505	0.126309	0.802809	0.930231
SPAC9G1.12	R1	Ile	2184.21	-0.508461	0.140381	7.9338e-05	0.000474006
SPAC9G1.12	R1	Pro	2184.21	0.0874772	0.109496	0.196218	0.641696
SPAC9G1.12	R1	Glu	2184.21	-0.810946	0.140559	1.35343e-09	1.53524e-08
SPAC9G1.12	R1	Amm	2184.21	0.355937	0.139717	0.00339861	0.0190562
SPAC14C4.09	R1	Trp	2839.03	0.0866962	0.14535	0.470515	0.854715
SPAC14C4.09	R1	Gly	2839.03	-0.150371	0.155322	0.0843973	0.595255
SPAC14C4.09	R1	Phe	2839.03	0.248956	0.171746	0.0329024	0.183027
SPAC14C4.09	R1	Ser	2839.03	-0.296425	0.164956	0.0352831	0.136793
SPAC14C4.09	R1	Ile	2839.03	-0.350402	0.167245	0.0158363	0.0438481
SPAC14C4.09	R1	Pro	2839.03	0.898983	0.176017	1.65802e-08	1.77851e-06
SPAC14C4.09	R1	Glu	2839.03	-1.01812	0.173113	5.11526e-10	6.24874e-09
SPAC14C4.09	R1	Amm	2839.03	0.694468	0.175706	7.81329e-06	9.99087e-05
SPBC1683.12	R1	Trp	4504.66	-0.0488818	0.215667	0.678254	0.969854
SPBC1683.12	R1	Gly	4504.66	0.0398339	0.132084	0.346928	0.999108
SPBC1683.12	R1	Phe	4504.66	0.265621	0.431808	0.0236169	0.146342
SPBC1683.12	R1	Ser	4504.66	-0.576118	0.424186	0.0144945	0.0694128
SPBC1683.12	R1	Ile	4504.66	-0.770849	0.422155	0.00567547	0.0187268
SPBC1683.12	R1	Pro	4504.66	0.792428	0.496881	0.00272411	0.0413499
SPBC1683.12	R1	Glu	4504.66	-1.08436	0.407523	0.000637476	0.00248705
SPBC1683.12	R1	Amm	4504.66	0.232864	0.300975	0.0984629	0.259771
SPBC409.08	R1	Trp	1399.02	-0.406484	0.273045	0.0232314	0.109653
SPBC409.08	R1	Gly	1399.02	0.0426925	0.12521	0.436355	0.999108
SPBC409.08	R1	Phe	1399.02	0.480879	0.311806	0.00696316	0.0612137
SPBC409.08	R1	Ser	1399.02	-0.0547502	0.199527	0.716845	0.895919
SPBC409.08	R1	Ile	1399.02	-0.750167	0.277548	0.000758416	0.00332474
SPBC409.08	R1	Pro	1399.02	0.0410987	0.118371	0.39689	0.837627
SPBC409.08	R1	Glu	1399.02	-1.47438	0.270913	4.92456e-09	5.05075e-08
SPBC409.08	R1	Amm	1399.02	0.324616	0.26044	0.0456406	0.150798
SPBC21H7.04	R1	Trp	1530.16	-0.31991	0.0956923	0.000328239	0.0031561
SPBC21H7.04	R1	Gly	1530.16	0.0144181	0.0775329	0.818935	0.999108
SPBC21H7.04	R1	Phe	1530.16	0.222988	0.0946964	0.00646126	0.0574166
SPBC21H7.04	R1	Ser	1530.16	0.00327099	0.091092	0.972182	0.990491
SPBC21H7.04	R1	Ile	1530.16	-0.652099	0.097567	5.12681e-12	1.30773e-10
SPBC21H7.04	R1	Pro	1530.16	0.041762	0.0775681	0.495687	0.894196
SPBC21H7.04	R1	Glu	1530.16	-1.08025	0.097353	1.70128e-29	1.25006e-27
SPBC21H7.04	R1	Amm	1530.16	0.492241	0.0963321	6.14972e-08	1.31061e-06
SPBC337.14	R1	Trp	1533.71	-0.425147	0.111035	3.14548e-05	0.000390056
SPBC337.14	R1	Gly	1533.71	0.122884	0.100328	0.0913666	0.617435
SPBC337.14	R1	Phe	1533.71	0.299145	0.111143	0.0015045	0.0190402
SPBC337.14	R1	Ser	1533.71	-0.190315	0.106108	0.0547295	0.189497
SPBC337.14	R1	Ile	1533.71	-0.735521	0.111947	8.45189e-12	2.08043e-10
SPBC337.14	R1	Pro	1533.71	0.301888	0.115229	0.000943826	0.0179364
SPBC337.14	R1	Glu	1533.71	-1.19996	0.111799	5.90106e-28	3.9258e-26
SPBC337.14	R1	Amm	1533.71	0.469735	0.110785	4.28909e-06	5.88166e-05
SPAC1399.06	R1	Trp	81.1582	-0.410525	0.249634	0.0182021	0.0911585
SPAC1399.06	R1	Gly	81.1582	0.0848113	0.14145	0.193813	0.866769
SPAC1399.06	R1	Phe	81.1582	0.516536	0.258592	0.00298404	0.0322129
SPAC1399.06	R1	Ser	81.1582	-0.1947	0.20806	0.21324	0.48444
SPAC1399.06	R1	Ile	81.1582	-0.536365	0.254615	0.00692013	0.0219934
SPAC1399.06	R1	Pro	81.1582	0.670511	0.255721	0.000373674	0.00888534
SPAC1399.06	R1	Glu	81.1582	-1.49614	0.268769	2.23227e-09	2.40997e-08
SPAC1399.06	R1	Amm	81.1582	0.505485	0.252026	0.00553636	0.0282733
SPBC428.03c	R1	Trp	26307.2	-0.522517	0.213214	0.00204341	0.0151274
SPBC428.03c	R1	Gly	26307.2	0.0276667	0.113245	0.650729	0.999108
SPBC428.03c	R1	Phe	26307.2	0.802088	0.216009	1.19808e-05	0.000327676
SPBC428.03c	R1	Ser	26307.2	-0.164228	0.179508	0.255777	0.539011
SPBC428.03c	R1	Ile	26307.2	-0.351943	0.198805	0.025441	0.0643277
SPBC428.03c	R1	Pro	26307.2	0.166169	0.200624	0.0453973	0.279863
SPBC428.03c	R1	Glu	26307.2	-1.34016	0.208094	1.02181e-11	1.55386e-10
SPBC428.03c	R1	Amm	26307.2	0.723433	0.214162	6.60677e-05	0.000631556
SPAC11D3.14c	R1	Trp	2852.13	0.594917	0.205564	0.000479997	0.00440042
SPAC11D3.14c	R1	Gly	2852.13	0.0217778	0.110999	0.712173	0.999108
SPAC11D3.14c	R1	Phe	2852.13	-0.124942	0.156112	0.195512	0.536211
SPAC11D3.14c	R1	Ser	2852.13	-0.574319	0.20311	0.000806483	0.00644532
SPAC11D3.14c	R1	Ile	2852.13	0.405589	0.195234	0.0109243	0.0323393
SPAC11D3.14c	R1	Pro	2852.13	-0.0324591	0.107602	0.591707	0.934385
SPAC11D3.14c	R1	Glu	2852.13	-0.269668	0.186393	0.0903069	0.170322
SPAC11D3.14c	R1	Amm	2852.13	1.40894	0.200903	1.26131e-13	8.74569e-12
SPAC11D3.15	R1	Trp	4898.28	0.30534	0.159558	0.0214075	0.103121
SPAC11D3.15	R1	Gly	4898.28	0.0233911	0.103682	0.719731	0.999108
SPAC11D3.15	R1	Phe	4898.28	-0.795474	0.168621	1.68303e-07	8.8144e-06
SPAC11D3.15	R1	Ser	4898.28	-0.087684	0.144745	0.486464	0.759671
SPAC11D3.15	R1	Ile	4898.28	0.934716	0.164889	1.3993e-09	2.28104e-08
SPAC11D3.15	R1	Pro	4898.28	-0.091645	0.12242	0.183638	0.618069
SPAC11D3.15	R1	Glu	4898.28	-0.68277	0.164576	8.03442e-06	4.77712e-05
SPAC11D3.15	R1	Amm	4898.28	2.16694	0.163261	1.72774e-41	2.83522e-38
SPAC21E11.04	R1	Trp	13788.8	-0.195563	0.365541	0.015386	0.0793143
SPAC21E11.04	R1	Gly	13788.8	0.0208511	0.132334	0.335797	0.999108
SPAC21E11.04	R1	Phe	13788.8	0.0250171	0.171907	0.477051	0.792264
SPAC21E11.04	R1	Ser	13788.8	-0.207287	0.386259	0.0508942	0.179036
SPAC21E11.04	R1	Ile	13788.8	0.0298754	0.299649	0.789962	0.864602
SPAC21E11.04	R1	Pro	13788.8	-0.00371332	0.120386	0.823591	0.980147
SPAC21E11.04	R1	Glu	13788.8	-0.104453	0.361939	0.470478	0.596181
SPAC21E11.04	R1	Amm	13788.8	2.82277	0.921267	7.39317e-05	0.00069195
SPCC24B10.14c	R1	Trp	368.676	0.0292695	0.239692	0.745698	0.979545
SPCC24B10.14c	R1	Gly	368.676	0.00527046	0.129063	0.829492	0.999108
SPCC24B10.14c	R1	Phe	368.676	-0.0373096	0.172974	0.407081	0.747505
SPCC24B10.14c	R1	Ser	368.676	0.0258567	0.27182	0.806453	0.931308
SPCC24B10.14c	R1	Ile	368.676	-0.162857	0.336142	0.221348	0.350722
SPCC24B10.14c	R1	Pro	368.676	-0.00138168	0.119605	0.941975	0.992374
SPCC24B10.14c	R1	Glu	368.676	0.11425	0.34653	0.499179	0.62293
SPCC24B10.14c	R1	Amm	368.676	3.26533	0.705616	1.09995e-07	2.21929e-06
SPAC630.08c	R1	Trp	13041.4	-0.0955612	0.166805	0.453589	0.842409
SPAC630.08c	R1	Gly	13041.4	0.759101	0.220767	2.83687e-05	0.0010269
SPAC630.08c	R1	Phe	13041.4	-0.0213804	0.133511	0.819401	0.943605
SPAC630.08c	R1	Ser	13041.4	-0.380095	0.203835	0.0216044	0.0943732
SPAC630.08c	R1	Ile	13041.4	-0.419563	0.20518	0.0120276	0.0350367
SPAC630.08c	R1	Pro	13041.4	0.241551	0.251297	0.021231	0.179793
SPAC630.08c	R1	Glu	13041.4	0.0129966	0.18143	0.936983	0.960793
SPAC630.08c	R1	Amm	13041.4	1.62642	0.209595	4.96195e-16	5.19738e-14
SPBC1778.04	R1	Trp	43.7334	0.00558406	0.201386	0.964423	0.997804
SPBC1778.04	R1	Gly	43.7334	0.699349	0.370366	0.00197628	0.0397111
SPBC1778.04	R1	Phe	43.7334	-0.0353887	0.15708	0.617658	0.866799
SPBC1778.04	R1	Ser	43.7334	-0.147798	0.243416	0.346606	0.636435
SPBC1778.04	R1	Ile	43.7334	-0.238745	0.272791	0.186874	0.308615
SPBC1778.04	R1	Pro	43.7334	-0.0283203	0.117866	0.460323	NA
SPBC1778.04	R1	Glu	43.7334	0.717176	0.304948	0.00319888	0.0105409
SPBC1778.04	R1	Amm	43.7334	1.87082	0.29936	2.40754e-11	1.07749e-09
SPAC589.11	R1	Trp	122.574	0.0517875	0.22163	0.655919	0.962928
SPAC589.11	R1	Gly	122.574	-0.0106517	0.125843	0.778951	0.999108
SPAC589.11	R1	Phe	122.574	0.010634	0.159956	0.871733	0.961435
SPAC589.11	R1	Ser	122.574	-0.0677236	0.247884	0.633314	0.853259
SPAC589.11	R1	Ile	122.574	-0.271851	0.334728	0.140081	0.248511
SPAC589.11	R1	Pro	122.574	0.0273815	0.120927	0.415583	0.847495
SPAC589.11	R1	Glu	122.574	0.0220602	0.283526	0.908501	0.943634
SPAC589.11	R1	Amm	122.574	2.18674	0.456067	3.39957e-08	7.78421e-07
SPAC3C7.02c	R1	Trp	1443.36	-0.0828426	0.233288	0.468943	0.854715
SPAC3C7.02c	R1	Gly	1443.36	0.0971524	0.180299	0.0276612	0.301274
SPAC3C7.02c	R1	Phe	1443.36	0.00874693	0.161016	0.885557	0.965581
SPAC3C7.02c	R1	Ser	1443.36	-0.0552426	0.249892	0.678936	0.87978
SPAC3C7.02c	R1	Ile	1443.36	-0.097959	0.269934	0.508552	0.641949
SPAC3C7.02c	R1	Pro	1443.36	0.00821419	0.117517	0.804991	0.979302
SPAC3C7.02c	R1	Glu	1443.36	-0.149552	0.305582	0.435875	0.564202
SPAC3C7.02c	R1	Amm	1443.36	1.84609	0.464051	3.1651e-06	4.42665e-05
SPAC22F3.05c	R1	Trp	227.323	-0.0170812	0.23206	0.857242	0.989358
SPAC22F3.05c	R1	Gly	227.323	0.00820661	0.128251	0.784037	0.999108
SPAC22F3.05c	R1	Phe	227.323	-0.0530726	0.176188	0.293274	0.651022
SPAC22F3.05c	R1	Ser	227.323	0.0315111	0.263244	0.805808	0.931273
SPAC22F3.05c	R1	Ile	227.323	-0.123386	0.300971	0.39153	0.5307
SPAC22F3.05c	R1	Pro	227.323	0.0201866	0.121197	0.40472	0.839528
SPAC22F3.05c	R1	Glu	227.323	-0.0447397	0.316228	0.800863	0.868368
SPAC22F3.05c	R1	Amm	227.323	1.9327	0.624317	6.1605e-05	0.000595838
SPAC25B8.09	R1	Trp	1855.14	0.0379922	0.208441	0.756475	0.981109
SPAC25B8.09	R1	Gly	1855.14	-0.00227289	0.123129	0.961568	0.999108
SPAC25B8.09	R1	Phe	1855.14	-0.0263386	0.157324	0.70081	0.907201
SPAC25B8.09	R1	Ser	1855.14	-0.00426793	0.226662	0.969433	0.989806
SPAC25B8.09	R1	Ile	1855.14	-0.192904	0.269492	0.26359	0.398542
SPAC25B8.09	R1	Pro	1855.14	0.112917	0.1944	0.0259994	0.203876
SPAC25B8.09	R1	Glu	1855.14	0.0349633	0.258716	0.855768	0.90778
SPAC25B8.09	R1	Amm	1855.14	1.95663	0.364313	4.33327e-09	1.18515e-07
SPCC330.01c	R1	Trp	1987	-0.0378768	0.207249	0.754538	0.981109
SPCC330.01c	R1	Gly	1987	0.0162355	0.124096	0.71452	0.999108
SPCC330.01c	R1	Phe	1987	-0.136056	0.214936	0.108023	0.384525
SPCC330.01c	R1	Ser	1987	0.238809	0.280687	0.162328	0.407517
SPCC330.01c	R1	Ile	1987	-0.49957	0.357542	0.0270933	0.0676898
SPCC330.01c	R1	Pro	1987	-0.00859606	0.115106	0.802166	0.979302
SPCC330.01c	R1	Glu	1987	0.0868994	0.260465	0.690656	0.786332
SPCC330.01c	R1	Amm	1987	1.75878	0.360181	6.42642e-08	1.36367e-06
SPCC16C4.02c	R1	Trp	1849.46	0.0519736	0.21206	0.674434	0.969001
SPCC16C4.02c	R1	Gly	1849.46	-0.00993285	0.123906	0.794692	0.999108
SPCC16C4.02c	R1	Phe	1849.46	-0.0082735	0.155979	0.90014	0.969881
SPCC16C4.02c	R1	Ser	1849.46	-0.282338	0.307049	0.11301	0.316108
SPCC16C4.02c	R1	Ile	1849.46	-0.311193	0.315689	0.106487	0.202485
SPCC16C4.02c	R1	Pro	1849.46	0.117584	0.203976	0.021053	0.179546
SPCC16C4.02c	R1	Glu	1849.46	0.324903	0.314811	0.133965	0.231651
SPCC16C4.02c	R1	Amm	1849.46	1.73186	0.374616	1.69058e-07	3.28962e-06
SPAC29E6.04	R1	Trp	565.562	0.0896484	0.189526	0.495938	0.873213
SPAC29E6.04	R1	Gly	565.562	-0.0142232	0.117976	0.79028	0.999108
SPAC29E6.04	R1	Phe	565.562	-0.118333	0.177878	0.196563	0.537044
SPAC29E6.04	R1	Ser	565.562	-0.122926	0.205301	0.420407	0.710981
SPAC29E6.04	R1	Ile	565.562	-0.635872	0.272004	0.002806	0.0103081
SPAC29E6.04	R1	Pro	565.562	0.0992368	0.157904	0.0942504	0.427984
SPAC29E6.04	R1	Glu	565.562	0.299491	0.238091	0.115597	0.206939
SPAC29E6.04	R1	Amm	565.562	1.86303	0.264665	9.69829e-14	6.91952e-12
SPCC1450.13c	R1	Trp	3606.23	-0.0476716	0.221001	0.676005	0.969001
SPCC1450.13c	R1	Gly	3606.23	0.0617522	0.145224	0.13605	0.750004
SPCC1450.13c	R1	Phe	3606.23	-0.0136392	0.160126	0.821929	0.943647
SPCC1450.13c	R1	Ser	3606.23	-0.0213262	0.241594	0.87255	0.957762
SPCC1450.13c	R1	Ile	3606.23	-0.496158	0.433493	0.0340577	0.0816688
SPCC1450.13c	R1	Pro	3606.23	0.0052286	0.116801	0.877108	0.989743
SPCC1450.13c	R1	Glu	3606.23	0.353224	0.360254	0.113019	0.203063
SPCC1450.13c	R1	Amm	3606.23	1.83177	0.435774	1.11365e-06	1.72405e-05
SPAC821.08c	R1	Trp	2689.79	-0.0462525	0.145259	0.697096	0.971842
SPAC821.08c	R1	Gly	2689.79	0.0239953	0.106723	0.70822	0.999108
SPAC821.08c	R1	Phe	2689.79	0.231874	0.172478	0.0414312	0.212464
SPAC821.08c	R1	Ser	2689.79	-0.287687	0.168226	0.0416579	0.155365
SPAC821.08c	R1	Ile	2689.79	-0.99195	0.179011	2.19428e-09	3.4077e-08
SPAC821.08c	R1	Pro	2689.79	1.23924	0.177753	2.43137e-13	7.82414e-11
SPAC821.08c	R1	Glu	2689.79	-0.951106	0.177809	1.90313e-08	1.77446e-07
SPAC821.08c	R1	Amm	2689.79	1.93688	0.175802	2.60493e-29	2.13735e-26
SPAC29B12.10c	R1	Trp	8619.8	0.0204343	0.203186	0.870807	0.989358
SPAC29B12.10c	R1	Gly	8619.8	-0.0339569	0.127727	0.458228	0.999108
SPAC29B12.10c	R1	Phe	8619.8	0.142872	0.218368	0.092802	0.357293
SPAC29B12.10c	R1	Ser	8619.8	-0.18013	0.253891	0.262297	0.545308
SPAC29B12.10c	R1	Ile	8619.8	-1.41041	0.350077	3.25275e-06	2.74201e-05
SPAC29B12.10c	R1	Pro	8619.8	1.15081	0.36498	6.40741e-05	0.00204825
SPAC29B12.10c	R1	Glu	8619.8	-0.27864	0.288136	0.177722	0.287049
SPAC29B12.10c	R1	Amm	8619.8	3.03702	0.338309	1.59876e-20	3.27946e-18
SPAP8A3.02c	R1	Trp	499.922	0.0371613	0.170592	0.788544	0.982297
SPAP8A3.02c	R1	Gly	499.922	-0.0256753	0.116232	0.655422	0.999108
SPAP8A3.02c	R1	Phe	499.922	-0.0360351	0.14058	0.6822	0.896788
SPAP8A3.02c	R1	Ser	499.922	0.0434721	0.181676	0.763776	0.918883
SPAP8A3.02c	R1	Ile	499.922	-1.30906	0.240275	3.63475e-09	5.50581e-08
SPAP8A3.02c	R1	Pro	499.922	0.640824	0.254986	0.000506856	0.0114468
SPAP8A3.02c	R1	Glu	499.922	-0.238336	0.210343	0.174278	0.282897
SPAP8A3.02c	R1	Amm	499.922	2.07734	0.230692	1.06681e-20	2.28343e-18
SPAPB24D3.02c	R1	Trp	1576.84	-0.014875	0.204589	0.891924	0.990264
SPAPB24D3.02c	R1	Gly	1576.84	0.00533918	0.122833	0.924324	0.999108
SPAPB24D3.02c	R1	Phe	1576.84	0.0266587	0.156491	0.714381	0.913356
SPAPB24D3.02c	R1	Ser	1576.84	-0.142282	0.245457	0.371877	0.664177
SPAPB24D3.02c	R1	Ile	1576.84	-0.779454	0.372385	0.00334003	0.0119152
SPAPB24D3.02c	R1	Pro	1576.84	0.095792	0.168129	0.0478257	0.290383
SPAPB24D3.02c	R1	Glu	1576.84	-0.377401	0.316578	0.0879603	0.166806
SPAPB24D3.02c	R1	Amm	1576.84	2.47312	0.349673	7.13948e-14	5.32655e-12
SPCC330.07c	R1	Trp	538.197	-0.128181	0.181211	0.326139	0.712642
SPCC330.07c	R1	Gly	538.197	0.0117137	0.113852	0.874452	0.999108
SPCC330.07c	R1	Phe	538.197	0.154671	0.182126	0.134265	0.435154
SPCC330.07c	R1	Ser	538.197	1.18122	0.228099	1.73395e-08	3.86255e-07
SPCC330.07c	R1	Ile	538.197	-1.42058	0.236375	1.33488e-10	2.58724e-09
SPCC330.07c	R1	Pro	538.197	-0.191969	0.250904	0.0293571	0.220041
SPCC330.07c	R1	Glu	538.197	-0.133052	0.198236	0.458096	0.584553
SPCC330.07c	R1	Amm	538.197	1.85918	0.226785	1.6382e-17	2.06791e-15
SPAC16A10.04	R1	Trp	945.936	0.0188639	0.200026	0.887215	0.990264
SPAC16A10.04	R1	Gly	945.936	-0.0136667	0.122501	0.765454	0.999108
SPAC16A10.04	R1	Phe	945.936	-0.0554823	0.161508	0.452732	0.779238
SPAC16A10.04	R1	Ser	945.936	0.0169751	0.21822	0.902724	0.97033
SPAC16A10.04	R1	Ile	945.936	-0.60837	0.342256	0.0101261	0.0303229
SPAC16A10.04	R1	Pro	945.936	0.0899152	0.15864	0.0680235	0.359638
SPAC16A10.04	R1	Glu	945.936	-0.354993	0.295602	0.0974924	0.180559
SPAC16A10.04	R1	Amm	945.936	1.58794	0.334387	1.05633e-07	2.14889e-06
SPAC3G9.12	R1	Trp	1473.78	-0.0278928	0.20885	0.814482	0.988801
SPAC3G9.12	R1	Gly	1473.78	0.00834963	0.123734	0.84741	0.999108
SPAC3G9.12	R1	Phe	1473.78	-0.0749871	0.174024	0.303478	0.657151
SPAC3G9.12	R1	Ser	1473.78	0.0437198	0.230721	0.764165	0.918902
SPAC3G9.12	R1	Ile	1473.78	-0.597101	0.386894	0.0142097	0.0401805
SPAC3G9.12	R1	Pro	1473.78	0.0364993	0.122322	0.343018	0.794629
SPAC3G9.12	R1	Glu	1473.78	-0.231628	0.291791	0.273652	0.404075
SPAC3G9.12	R1	Amm	1473.78	1.69244	0.375597	3.20502e-07	5.86555e-06
SPBC428.08c	R1	Trp	273.713	0.0818269	0.226908	0.484914	0.866195
SPBC428.08c	R1	Gly	273.713	-0.0076182	0.125201	0.827613	0.999108
SPBC428.08c	R1	Phe	273.713	-0.0591005	0.170923	0.366849	0.718376
SPBC428.08c	R1	Ser	273.713	0.0803211	0.24706	0.576091	0.819918
SPBC428.08c	R1	Ile	273.713	-0.35472	0.3663	0.0794906	0.160514
SPBC428.08c	R1	Pro	273.713	0.0362271	0.123728	0.277974	0.737571
SPBC428.08c	R1	Glu	273.713	-0.547301	0.415259	0.0354684	0.0800235
SPBC428.08c	R1	Amm	273.713	1.81821	0.425336	8.50574e-07	1.36842e-05
SPCC162.12	R1	Trp	2361.67	-0.146346	0.243453	0.265074	0.637233
SPCC162.12	R1	Gly	2361.67	0.0109306	0.124287	0.797479	0.999108
SPCC162.12	R1	Phe	2361.67	-0.0127971	0.156881	0.839498	0.951057
SPCC162.12	R1	Ser	2361.67	0.00939242	0.230575	0.951507	0.986521
SPCC162.12	R1	Ile	2361.67	-0.656009	0.400123	0.011448	0.033667
SPCC162.12	R1	Pro	2361.67	0.045202	0.126533	0.260082	0.7172
SPCC162.12	R1	Glu	2361.67	-0.474754	0.357212	0.0506296	0.107513
SPCC162.12	R1	Amm	2361.67	1.90285	0.381205	2.93039e-08	6.90255e-07
SPAC3G9.04	R1	Trp	944.539	0.0627247	0.152064	0.619873	0.951234
SPAC3G9.04	R1	Gly	944.539	-0.035115	0.111045	0.586016	0.999108
SPAC3G9.04	R1	Phe	944.539	-0.00511524	0.126459	0.972612	0.99165
SPAC3G9.04	R1	Ser	944.539	-0.00419952	0.157447	0.96376	0.988313
SPAC3G9.04	R1	Ile	944.539	-0.777164	0.191955	6.30959e-06	4.9462e-05
SPAC3G9.04	R1	Pro	944.539	0.188921	0.196075	0.0341358	0.237757
SPAC3G9.04	R1	Glu	944.539	-0.168734	0.17165	0.260752	0.389467
SPAC3G9.04	R1	Amm	944.539	1.30553	0.188904	3.60049e-13	2.33227e-11
SPBC460.03	R1	Trp	695.443	0.12862	0.195896	0.33772	0.72825
SPBC460.03	R1	Gly	695.443	0.00156458	0.116783	0.978783	0.999108
SPBC460.03	R1	Phe	695.443	0.0158337	0.143581	0.894689	0.967821
SPBC460.03	R1	Ser	695.443	0.1797	0.21244	0.250462	0.532912
SPBC460.03	R1	Ile	695.443	-0.947111	0.266465	3.6159e-05	0.000235153
SPBC460.03	R1	Pro	695.443	0.0256555	0.112601	0.607264	0.939959
SPBC460.03	R1	Glu	695.443	-0.0987784	0.213568	0.573064	0.686263
SPBC460.03	R1	Amm	695.443	1.35211	0.260046	1.10737e-08	2.7957e-07
SPCC1682.03c	R1	Trp	669.334	0.0718436	0.181345	0.57109	0.926047
SPCC1682.03c	R1	Gly	669.334	-0.0307477	0.119533	0.582241	0.999108
SPCC1682.03c	R1	Phe	669.334	0.00132089	0.141299	0.988807	0.997929
SPCC1682.03c	R1	Ser	669.334	-0.0267147	0.189712	0.814024	0.934815
SPCC1682.03c	R1	Ile	669.334	-0.933045	0.258024	2.89281e-05	0.000194288
SPCC1682.03c	R1	Pro	669.334	0.400471	0.32926	0.00801438	0.0929938
SPCC1682.03c	R1	Glu	669.334	-0.328177	0.231867	0.0809878	0.156232
SPCC1682.03c	R1	Amm	669.334	1.53166	0.252079	6.75316e-11	2.76922e-09
SPCC830.03	R1	Trp	1359.18	0.108704	0.215166	0.40313	0.798313
SPCC830.03	R1	Gly	1359.18	-0.0428583	0.129996	0.373232	0.999108
SPCC830.03	R1	Phe	1359.18	-0.0791687	0.170805	0.309896	0.662761
SPCC830.03	R1	Ser	1359.18	0.143997	0.236696	0.362313	0.653119
SPCC830.03	R1	Ile	1359.18	-1.01409	0.340441	0.000219779	0.00113169
SPCC830.03	R1	Pro	1359.18	0.0548898	0.129383	0.243972	0.69478
SPCC830.03	R1	Glu	1359.18	-0.305191	0.283779	0.137093	0.235818
SPCC830.03	R1	Amm	1359.18	1.64032	0.330854	3.69214e-08	8.29972e-07
SPAC5D6.02c	R1	Trp	255.883	0.053489	0.182785	0.699703	0.971842
SPAC5D6.02c	R1	Gly	255.883	-0.0591637	0.131129	0.305973	0.999108
SPAC5D6.02c	R1	Phe	255.883	0.0505877	0.149379	0.545119	0.831057
SPAC5D6.02c	R1	Ser	255.883	-0.236601	0.22637	0.148894	0.383372
SPAC5D6.02c	R1	Ile	255.883	-0.876875	0.274795	0.000141527	0.000776743
SPAC5D6.02c	R1	Pro	255.883	0.171945	0.257344	0.0306227	0.225673
SPAC5D6.02c	R1	Glu	255.883	-0.0539448	0.214903	0.759591	0.837131
SPAC5D6.02c	R1	Amm	255.883	1.80244	0.261312	2.56287e-13	1.705e-11
SPCC364.06	R1	Trp	10136.1	0.0115904	0.17159	0.929575	0.99376
SPCC364.06	R1	Gly	10136.1	0.012102	0.114904	0.832873	0.999108
SPCC364.06	R1	Phe	10136.1	-0.0189502	0.139562	0.820513	0.943647
SPCC364.06	R1	Ser	10136.1	-0.109747	0.189481	0.45509	0.735257
SPCC364.06	R1	Ile	10136.1	-0.729908	0.240409	0.000312668	0.00153927
SPCC364.06	R1	Pro	10136.1	0.344318	0.31109	0.0105599	0.112028
SPCC364.06	R1	Glu	10136.1	-0.151959	0.204155	0.414488	0.54385
SPCC364.06	R1	Amm	10136.1	1.733	0.236953	1.0319e-14	9.07148e-13
SPAC26A3.03c	R1	Trp	356.713	0.044292	0.13871	0.705155	0.971842
SPAC26A3.03c	R1	Gly	356.713	0.00807706	0.102801	0.902854	0.999108
SPAC26A3.03c	R1	Phe	356.713	-0.129083	0.140235	0.17987	0.513929
SPAC26A3.03c	R1	Ser	356.713	-0.13675	0.149959	0.292386	0.583941
SPAC26A3.03c	R1	Ile	356.713	-0.928872	0.17584	1.40991e-08	1.90116e-07
SPAC26A3.03c	R1	Pro	356.713	0.178629	0.169015	0.0406767	0.262389
SPAC26A3.03c	R1	Glu	356.713	0.000125344	0.153235	0.995753	0.998012
SPAC26A3.03c	R1	Amm	356.713	1.57711	0.167492	2.72658e-22	6.71147e-20
SPCC162.05	R1	Trp	2072.39	0.0512361	0.163739	0.684119	0.970334
SPCC162.05	R1	Gly	2072.39	-0.0393841	0.116782	0.534627	0.999108
SPCC162.05	R1	Phe	2072.39	-0.136742	0.166688	0.177659	0.510576
SPCC162.05	R1	Ser	2072.39	0.0821792	0.174365	0.565548	0.81468
SPCC162.05	R1	Ile	2072.39	-1.15481	0.215591	8.7082e-09	1.22838e-07
SPCC162.05	R1	Pro	2072.39	0.17781	0.215755	0.0371818	0.248583
SPCC162.05	R1	Glu	2072.39	0.0201358	0.18417	0.964506	0.977411
SPCC162.05	R1	Amm	2072.39	1.65679	0.213343	5.3181e-16	5.45437e-14
SPAC1B2.06	R1	Trp	62.7509	-0.614324	0.290883	0.00345202	0.0236522
SPAC1B2.06	R1	Gly	62.7509	0.0334738	0.121279	0.549252	0.999108
SPAC1B2.06	R1	Phe	62.7509	0.565139	0.284349	0.00272382	0.0301335
SPAC1B2.06	R1	Ser	62.7509	-0.145396	0.21244	0.342218	0.632584
SPAC1B2.06	R1	Ile	62.7509	-0.829493	0.302123	0.000670232	0.00297793
SPAC1B2.06	R1	Pro	62.7509	0.0488063	0.12132	0.323829	0.776129
SPAC1B2.06	R1	Glu	62.7509	-0.266007	0.240913	0.164274	0.269933
SPAC1B2.06	R1	Amm	62.7509	1.8127	0.254672	6.22442e-14	4.86394e-12
SPBC428.02c	R1	Trp	55443.2	-0.569751	0.317117	0.00699844	0.042274
SPBC428.02c	R1	Gly	55443.2	0.0884404	0.155225	0.129545	0.735656
SPBC428.02c	R1	Phe	55443.2	0.533644	0.353242	0.00623043	0.0559715
SPBC428.02c	R1	Ser	55443.2	-0.163011	0.228462	0.301277	0.593274
SPBC428.02c	R1	Ile	55443.2	-0.326208	0.268458	0.0819715	0.163976
SPBC428.02c	R1	Pro	55443.2	0.0275143	0.115834	0.537405	0.918769
SPBC428.02c	R1	Glu	55443.2	-0.247753	0.253241	0.203721	0.318994
SPBC428.02c	R1	Amm	55443.2	1.47643	0.300162	4.80188e-08	1.04882e-06
SPBC3H7.18	R1	Trp	400.871	-0.623136	0.253481	0.00160154	0.0123001
SPBC3H7.18	R1	Gly	400.871	0.0210076	0.116637	0.711035	0.999108
SPBC3H7.18	R1	Phe	400.871	-0.0404836	0.143645	0.627167	0.871449
SPBC3H7.18	R1	Ser	400.871	-0.0622564	0.188279	0.642569	0.857979
SPBC3H7.18	R1	Ile	400.871	-0.541257	0.246475	0.00570214	0.0187776
SPBC3H7.18	R1	Pro	400.871	0.48722	0.290999	0.00351355	0.0507781
SPBC3H7.18	R1	Glu	400.871	-0.0166184	0.2026	0.919711	0.950606
SPBC3H7.18	R1	Amm	400.871	1.60482	0.243501	2.32561e-12	1.30102e-10
SPAC1F12.05	R1	Trp	2124.54	-0.180367	0.176286	0.164339	0.47257
SPAC1F12.05	R1	Gly	2124.54	-0.00111811	0.109899	0.98434	0.999108
SPAC1F12.05	R1	Phe	2124.54	0.0948555	0.146907	0.309386	0.662761
SPAC1F12.05	R1	Ser	2124.54	-0.250633	0.186431	0.0944505	0.278431
SPAC1F12.05	R1	Ile	2124.54	-0.612901	0.205599	0.000513696	0.00235688
SPAC1F12.05	R1	Pro	2124.54	0.665023	0.217191	0.000100897	0.0029517
SPAC1F12.05	R1	Glu	2124.54	-0.00628073	0.177523	0.966413	0.978143
SPAC1F12.05	R1	Amm	2124.54	1.46032	0.204505	7.14102e-14	5.32655e-12
SPBC3D6.03c	R1	Trp	1078.39	-0.137205	0.133885	0.234797	0.593652
SPBC3D6.03c	R1	Gly	1078.39	0.108834	0.122081	0.150729	0.785886
SPBC3D6.03c	R1	Phe	1078.39	-0.0173575	0.112846	0.839613	0.951057
SPBC3D6.03c	R1	Ser	1078.39	-0.135775	0.136436	0.263892	0.547421
SPBC3D6.03c	R1	Ile	1078.39	-0.725141	0.152018	3.97327e-07	4.17659e-06
SPBC3D6.03c	R1	Pro	1078.39	0.326534	0.163567	0.00322501	0.0471731
SPBC3D6.03c	R1	Glu	1078.39	-0.00785218	0.138372	0.906296	0.94228
SPBC3D6.03c	R1	Amm	1078.39	1.51233	0.149146	2.56994e-25	1.40576e-22
SPBC1683.10c	R1	Trp	5644.59	-0.336479	0.175621	0.0162254	0.0828605
SPBC1683.10c	R1	Gly	5644.59	0.0801601	0.123687	0.252917	0.965234
SPBC1683.10c	R1	Phe	5644.59	0.133293	0.147708	0.174012	0.505702
SPBC1683.10c	R1	Ser	5644.59	-0.191953	0.16227	0.162662	0.408147
SPBC1683.10c	R1	Ile	5644.59	-0.932868	0.180848	2.55232e-08	3.32409e-07
SPBC1683.10c	R1	Pro	5644.59	0.759367	0.185913	2.31906e-06	0.000123012
SPBC1683.10c	R1	Glu	5644.59	-0.476632	0.176094	0.00249459	0.00844044
SPBC1683.10c	R1	Amm	5644.59	1.00514	0.181285	2.15599e-09	6.55182e-08
SPAC6G9.15c	R1	Trp	1110.26	0.0143643	0.130347	0.900023	0.991731
SPAC6G9.15c	R1	Gly	1110.26	0.00341405	0.0993648	0.959356	0.999108
SPAC6G9.15c	R1	Phe	1110.26	0.0461082	0.116788	0.617601	0.866799
SPAC6G9.15c	R1	Ser	1110.26	-0.270912	0.147218	0.0383728	0.145432
SPAC6G9.15c	R1	Ile	1110.26	-0.734981	0.156297	3.93984e-07	4.16219e-06
SPAC6G9.15c	R1	Pro	1110.26	0.561064	0.161033	2.82304e-05	0.00101693
SPAC6G9.15c	R1	Glu	1110.26	-0.334269	0.14968	0.0160129	0.0412401
SPAC6G9.15c	R1	Amm	1110.26	1.37017	0.153937	3.45082e-20	6.53399e-18
SPBC947.06c	R1	Trp	1228.36	0.0340134	0.20062	0.786839	0.982297
SPBC947.06c	R1	Gly	1228.36	-0.00536189	0.121656	0.905425	0.999108
SPBC947.06c	R1	Phe	1228.36	0.0452328	0.158086	0.544635	0.831057
SPBC947.06c	R1	Ser	1228.36	-0.136231	0.235072	0.383162	0.675214
SPBC947.06c	R1	Ile	1228.36	-0.816263	0.343431	0.0016263	0.00647234
SPBC947.06c	R1	Pro	1228.36	0.733249	0.389425	0.00180183	0.0303046
SPBC947.06c	R1	Glu	1228.36	-0.595038	0.327079	0.0141398	0.0372273
SPBC947.06c	R1	Amm	1228.36	1.5302	0.333198	2.20921e-07	4.1992e-06
SPAC5H10.01	R1	Trp	7460.67	0.159845	0.247422	0.237622	0.59724
SPAC5H10.01	R1	Gly	7460.67	0.203581	0.45021	0.011699	0.165977
SPAC5H10.01	R1	Phe	7460.67	-0.521585	0.517791	0.00954097	0.0777188
SPAC5H10.01	R1	Ser	7460.67	-3.07897	0.366131	2.03177e-18	1.35168e-16
SPAC5H10.01	R1	Ile	7460.67	0.192014	0.272451	0.289312	0.426688
SPAC5H10.01	R1	Pro	7460.67	-0.015511	0.116452	0.673011	0.958573
SPAC5H10.01	R1	Glu	7460.67	-2.30064	0.369811	2.67861e-11	3.85579e-10
SPAC5H10.01	R1	Amm	7460.67	3.82898	0.362301	2.30298e-27	1.4172e-24
SPAC8F11.05c	R1	Trp	1326.59	0.0333874	0.251171	0.55473	0.917521
SPAC8F11.05c	R1	Gly	1326.59	-0.00573474	0.130662	0.923381	0.999108
SPAC8F11.05c	R1	Phe	1326.59	-0.0020626	0.170722	0.93947	0.982862
SPAC8F11.05c	R1	Ser	1326.59	0.00910844	0.286155	0.902215	0.970206
SPAC8F11.05c	R1	Ile	1326.59	-0.031856	0.30862	0.688337	0.789893
SPAC8F11.05c	R1	Pro	1326.59	0.00351923	0.12091	0.794848	0.979302
SPAC8F11.05c	R1	Glu	1326.59	0.0731258	0.367434	0.536328	0.655711
SPAC8F11.05c	R1	Amm	1326.59	6.78422	1.15587	6.80634e-11	2.76922e-09
SPCC16C4.06c	R1	Trp	576.216	0.0597042	0.138139	0.608418	0.946976
SPCC16C4.06c	R1	Gly	576.216	-0.0579681	0.110913	0.392104	0.999108
SPCC16C4.06c	R1	Phe	576.216	0.0947143	0.12959	0.303567	0.657151
SPCC16C4.06c	R1	Ser	576.216	0.0025037	0.142462	0.979599	0.992298
SPCC16C4.06c	R1	Ile	576.216	-0.47145	0.164708	0.00122346	0.00506143
SPCC16C4.06c	R1	Pro	576.216	0.13068	0.142077	0.0860525	0.408834
SPCC16C4.06c	R1	Glu	576.216	-0.81915	0.166208	1.42667e-07	1.16669e-06
SPCC16C4.06c	R1	Amm	576.216	0.89941	0.165106	4.14035e-09	1.13871e-07
SPCC31H12.06	R1	Trp	1615.03	0.0517072	0.182828	0.686441	0.971304
SPCC31H12.06	R1	Gly	1615.03	-0.300122	0.35311	0.0158613	0.210473
SPCC31H12.06	R1	Phe	1615.03	0.0352977	0.146246	0.639233	0.877564
SPCC31H12.06	R1	Ser	1615.03	0.0720192	0.19688	0.629682	0.850617
SPCC31H12.06	R1	Ile	1615.03	-0.384064	0.248254	0.039935	0.0932196
SPCC31H12.06	R1	Pro	1615.03	0.0142103	0.110712	0.798006	0.979302
SPCC31H12.06	R1	Glu	1615.03	-0.879743	0.262633	0.000114972	0.00053397
SPCC31H12.06	R1	Amm	1615.03	0.890599	0.270105	7.03647e-05	0.000664885
SPBC1683.11c	R1	Trp	2801.97	0.029088	0.170419	0.836474	0.989176
SPBC1683.11c	R1	Gly	2801.97	0.0244617	0.116041	0.651117	0.999108
SPBC1683.11c	R1	Phe	2801.97	-0.0483074	0.142783	0.572629	0.843235
SPBC1683.11c	R1	Ser	2801.97	-0.222063	0.203108	0.153647	0.390961
SPBC1683.11c	R1	Ile	2801.97	0.0563659	0.186841	0.712356	0.806653
SPBC1683.11c	R1	Pro	2801.97	0.151694	0.204851	0.0480815	0.291204
SPBC1683.11c	R1	Glu	2801.97	-0.799831	0.233552	0.000101599	0.000477264
SPBC1683.11c	R1	Amm	2801.97	1.13332	0.23582	1.02219e-07	2.10555e-06
SPBC887.17	R1	Trp	13468.9	0.00634956	0.162677	0.961847	0.997804
SPBC887.17	R1	Gly	13468.9	-0.0327766	0.115383	0.584433	0.999108
SPBC887.17	R1	Phe	13468.9	0.331897	0.230576	0.0166896	0.11556
SPBC887.17	R1	Ser	13468.9	0.0169414	0.172271	0.905987	0.971308
SPBC887.17	R1	Ile	13468.9	-0.206432	0.190149	0.182471	0.302813
SPBC887.17	R1	Pro	13468.9	0.0461314	0.113995	0.405952	0.840822
SPBC887.17	R1	Glu	13468.9	-0.68883	0.214811	0.000272122	0.00116492
SPBC887.17	R1	Amm	13468.9	1.1365	0.217403	1.12144e-08	2.81677e-07
SPBC947.11c	R1	Trp	1286.16	0.0432061	0.162017	0.741825	0.978666
SPBC947.11c	R1	Gly	1286.16	-0.105587	0.148167	0.127325	0.728862
SPBC947.11c	R1	Phe	1286.16	0.0472387	0.137063	0.601843	0.861051
SPBC947.11c	R1	Ser	1286.16	-0.0349146	0.170501	0.799105	0.929436
SPBC947.11c	R1	Ile	1286.16	-0.760126	0.214381	5.04671e-05	0.000317304
SPBC947.11c	R1	Pro	1286.16	0.365555	0.254606	0.00731374	0.0867406
SPBC947.11c	R1	Glu	1286.16	-0.598729	0.210001	0.00108656	0.00402796
SPBC947.11c	R1	Amm	1286.16	1.16687	0.21265	2.7506e-09	8.01256e-08
SPCC1739.11c	R1	Trp	2514.21	0.0541488	0.148681	0.628078	0.954259
SPCC1739.11c	R1	Gly	2514.21	-0.0402521	0.111021	0.531032	0.999108
SPCC1739.11c	R1	Phe	2514.21	-0.114872	0.143987	0.207418	0.548297
SPCC1739.11c	R1	Ser	2514.21	0.121444	0.158781	0.349119	0.638926
SPCC1739.11c	R1	Ile	2514.21	-0.662077	0.184444	5.46342e-05	0.00034003
SPCC1739.11c	R1	Pro	2514.21	0.308355	0.211996	0.0103464	0.110169
SPCC1739.11c	R1	Glu	2514.21	-0.434585	0.178554	0.00626938	0.0187821
SPCC1739.11c	R1	Amm	2514.21	1.32257	0.18345	3.51305e-14	2.83521e-12
SPCC4E9.02	R1	Trp	1602.62	-0.110288	0.216739	0.399832	0.794019
SPCC4E9.02	R1	Gly	1602.62	0.0444084	0.130837	0.358042	0.999108
SPCC4E9.02	R1	Phe	1602.62	0.0217274	0.153742	0.766964	0.929193
SPCC4E9.02	R1	Ser	1602.62	-0.198021	0.254172	0.225572	0.501351
SPCC4E9.02	R1	Ile	1602.62	-0.567981	0.339969	0.0137578	0.0392104
SPCC4E9.02	R1	Pro	1602.62	0.0828076	0.151416	0.0835039	0.402735
SPCC4E9.02	R1	Glu	1602.62	-0.380778	0.300546	0.0796969	0.154285
SPCC4E9.02	R1	Amm	1602.62	1.27738	0.341179	9.6249e-06	0.000120262
SPAC1705.02	R1	Trp	1045.37	0.0581203	0.186003	0.657235	0.962928
SPAC1705.02	R1	Gly	1045.37	-0.0622391	0.133567	0.278301	0.989225
SPAC1705.02	R1	Phe	1045.37	0.0452833	0.14941	0.583018	0.849768
SPAC1705.02	R1	Ser	1045.37	0.0876982	0.201627	0.552174	0.8052
SPAC1705.02	R1	Ile	1045.37	-0.592385	0.272506	0.00456149	0.0156054
SPAC1705.02	R1	Pro	1045.37	0.0231116	0.112753	0.620566	0.940169
SPAC1705.02	R1	Glu	1045.37	-0.468984	0.258034	0.0223786	0.0544855
SPAC1705.02	R1	Amm	1045.37	1.16519	0.272402	1.19224e-06	1.82848e-05
SPAC3F10.06c	R1	Trp	465.202	0.0113155	0.20458	0.926239	0.99376
SPAC3F10.06c	R1	Gly	465.202	-0.0015708	0.122731	0.967283	0.999108
SPAC3F10.06c	R1	Phe	465.202	0.0216486	0.155833	0.762172	0.927673
SPAC3F10.06c	R1	Ser	465.202	0.0378356	0.225914	0.800266	0.929615
SPAC3F10.06c	R1	Ile	465.202	-0.552466	0.363915	0.0194564	0.0516122
SPAC3F10.06c	R1	Pro	465.202	0.0698922	0.141564	0.107445	0.463896
SPAC3F10.06c	R1	Glu	465.202	-0.728585	0.363228	0.00700663	0.0206425
SPAC3F10.06c	R1	Amm	465.202	1.13187	0.37186	0.000121452	0.00107292
SPCP1E11.10	R1	Trp	607.317	0.0738135	0.158819	0.54587	0.910553
SPCP1E11.10	R1	Gly	607.317	-0.0186383	0.110338	0.75973	0.999108
SPCP1E11.10	R1	Phe	607.317	-0.0237284	0.130967	0.789361	0.936609
SPCP1E11.10	R1	Ser	607.317	0.197106	0.177011	0.167566	0.415941
SPCP1E11.10	R1	Ile	607.317	-0.824855	0.204786	6.55993e-06	5.10182e-05
SPCP1E11.10	R1	Pro	607.317	0.320422	0.238964	0.00979485	0.106486
SPCP1E11.10	R1	Glu	607.317	-1.12519	0.204028	3.60027e-09	3.78249e-08
SPCP1E11.10	R1	Amm	607.317	1.13259	0.201324	1.26594e-09	4.07335e-08
SPAC1B3.17	R1	Trp	756.68	0.0597377	0.154828	0.621655	0.951234
SPAC1B3.17	R1	Gly	756.68	0.0346549	0.112147	0.583465	0.999108
SPAC1B3.17	R1	Phe	756.68	-0.435956	0.210087	0.00327046	0.0344027
SPAC1B3.17	R1	Ser	756.68	0.386076	0.189516	0.0136173	0.0667045
SPAC1B3.17	R1	Ile	756.68	-0.728	0.198655	3.49398e-05	0.00022904
SPAC1B3.17	R1	Pro	756.68	0.0176069	0.103929	0.748509	0.974657
SPAC1B3.17	R1	Glu	756.68	-0.603205	0.195197	0.000513867	0.00205172
SPAC1B3.17	R1	Amm	756.68	1.27651	0.195401	3.95677e-12	2.14057e-10
SPBC17A3.06	R1	Trp	355.344	0.162283	0.181384	0.224618	0.579558
SPBC17A3.06	R1	Gly	355.344	-0.0649307	0.127052	0.304346	0.999108
SPBC17A3.06	R1	Phe	355.344	-0.0932001	0.15208	0.304175	0.657415
SPBC17A3.06	R1	Ser	355.344	0.226691	0.194075	0.138062	0.363303
SPBC17A3.06	R1	Ile	355.344	-0.947476	0.227136	3.1192e-06	2.643e-05
SPBC17A3.06	R1	Pro	355.344	0.115988	0.160471	0.0892601	0.417698
SPBC17A3.06	R1	Glu	355.344	-0.686869	0.223548	0.000436159	0.00176871
SPBC17A3.06	R1	Amm	355.344	1.10297	0.2229	4.8148e-08	1.04882e-06
SPAC13G6.08	R1	Trp	106.952	0.272111	0.252148	0.0867039	0.305981
SPAC13G6.08	R1	Gly	106.952	-0.117134	0.181617	0.0734091	0.561825
SPAC13G6.08	R1	Phe	106.952	0.070112	0.160112	0.393939	0.73712
SPAC13G6.08	R1	Ser	106.952	-0.411529	0.284691	0.0337759	0.133023
SPAC13G6.08	R1	Ile	106.952	-1.70564	0.318524	5.20797e-09	7.65339e-08
SPAC13G6.08	R1	Pro	106.952	0.0045052	0.111981	0.937157	0.992374
SPAC13G6.08	R1	Glu	106.952	-0.0189178	0.229113	0.914581	0.947492
SPAC13G6.08	R1	Amm	106.952	1.01742	0.311295	5.78128e-05	0.000564707
SPBC25B2.06c	R1	Trp	1842.92	0.0548707	0.0968633	0.549559	0.914631
SPBC25B2.06c	R1	Gly	1842.92	-0.0424591	0.0840487	0.541387	0.999108
SPBC25B2.06c	R1	Phe	1842.92	0.27326	0.104993	0.00247384	0.0280615
SPBC25B2.06c	R1	Ser	1842.92	-0.112724	0.0995804	0.226513	0.502127
SPBC25B2.06c	R1	Ile	1842.92	-0.801759	0.106573	4.26002e-15	1.57685e-13
SPBC25B2.06c	R1	Pro	1842.92	0.386846	0.108124	2.44222e-05	0.000913846
SPBC25B2.06c	R1	Glu	1842.92	-0.634768	0.104998	2.04914e-10	2.61346e-09
SPBC25B2.06c	R1	Amm	1842.92	0.862228	0.104634	1.44202e-17	1.86818e-15
SPAC17A5.12	R1	Trp	1358.73	0.0841719	0.154755	0.48796	0.867544
SPAC17A5.12	R1	Gly	1358.73	-0.106439	0.140659	0.17613	0.846765
SPAC17A5.12	R1	Phe	1358.73	0.139259	0.155388	0.175195	0.506561
SPAC17A5.12	R1	Ser	1358.73	-0.169249	0.167856	0.222906	0.499029
SPAC17A5.12	R1	Ile	1358.73	-1.07928	0.192492	1.82514e-09	2.87066e-08
SPAC17A5.12	R1	Pro	1358.73	0.330287	0.222018	0.00838388	0.095898
SPAC17A5.12	R1	Glu	1358.73	-0.851666	0.191241	1.27221e-06	8.80885e-06
[truncated: 37,386 more rows]
